# Supplementary material for: The RNA interactome of human telomerase RNA reveals a coding-independent role for a histone mRNA in telomere homeostasis
Source: eLife journal article supplement (doi:10.7554/elife.40037), 2018-10-25
Supplement: supp [file elife-40037-supp-v1.zip]

Archive with 13 entries (13 files):
- elife_poa_e40037_Figure_6_source_data_1.xlsx
- elife_poa_e40037_Figure_1_source_data_2.docx
- elife_poa_e40037_Figure_5_figure_supplement_1.pdf
- elife_poa_e40037_Figure_1_figure_supplement_2.pdf
- elife_poa_e40037_Figure_6_figure_supplement_2.pdf
- elife_poa_e40037_Figure_4_figure_supplement_1.pdf
- elife_poa_e40037_Supplementary_File_1..xlsx
- elife_poa_e40037_Figure_1_source_data_1.xlsx
- elife_poa_e40037_Transparent_Reporting_File.docx
- elife_poa_e40037_Figure_6_figure_supplement_1.pdf
- elife_poa_e40037_Figure_1_figure_supplement_1.pdf
- elife_poa_e40037_Figure_4_figure_supplement_2.pdf
- elife_poa_e40037_Figure_7_figure_supplement_1.pdf
