# Supplementary material for: The RNA interactome of human telomerase RNA reveals a coding-independent role for a histone mRNA in telomere homeostasis
Source: eLife journal article supplement (doi:10.7554/elife.40037), 2018-10-25
Supplement: supp [file elife-40037-supp-v1.zip › elife_poa_e40037_Figure_1_figure_supplement_2.pdf]

a TPT1

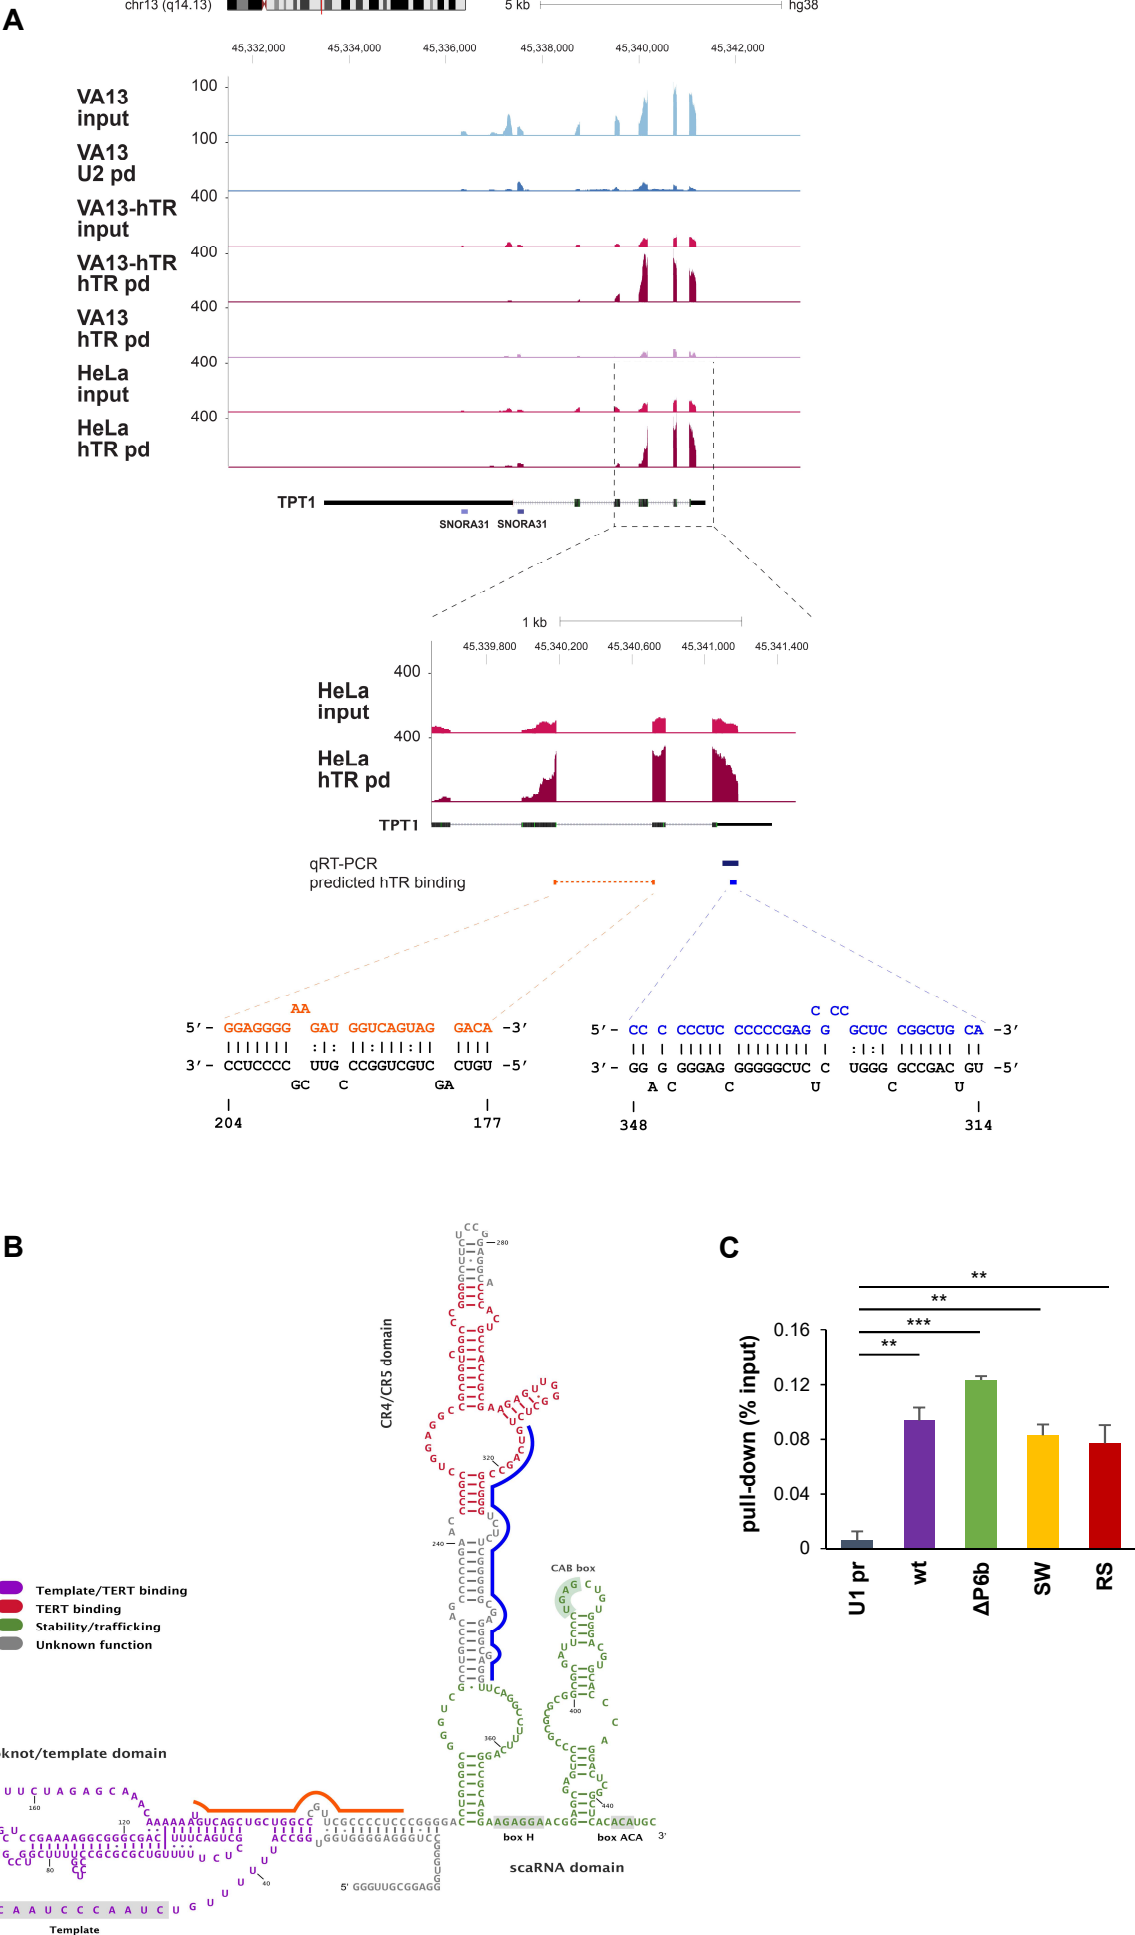

Figure 1 - Figure supplement 2 - a

**b FLNA**

**A**

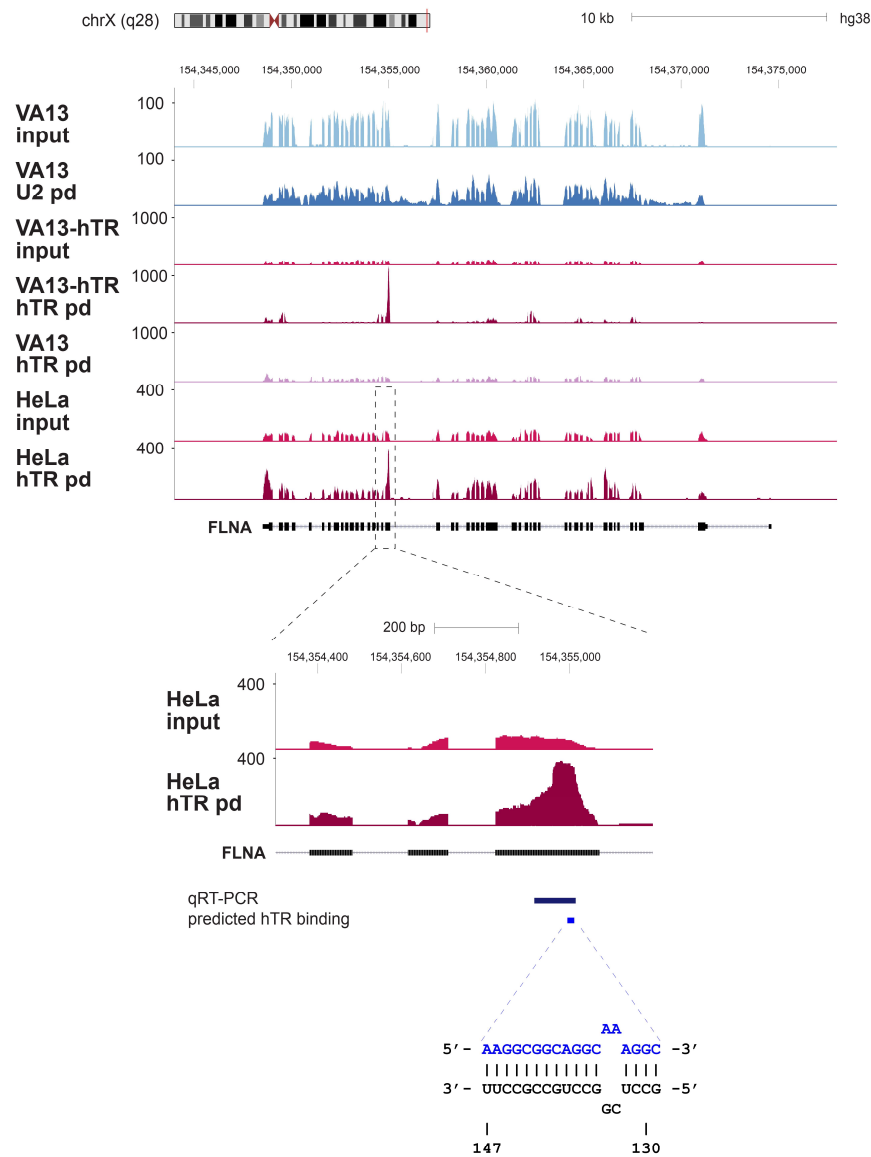

**B**

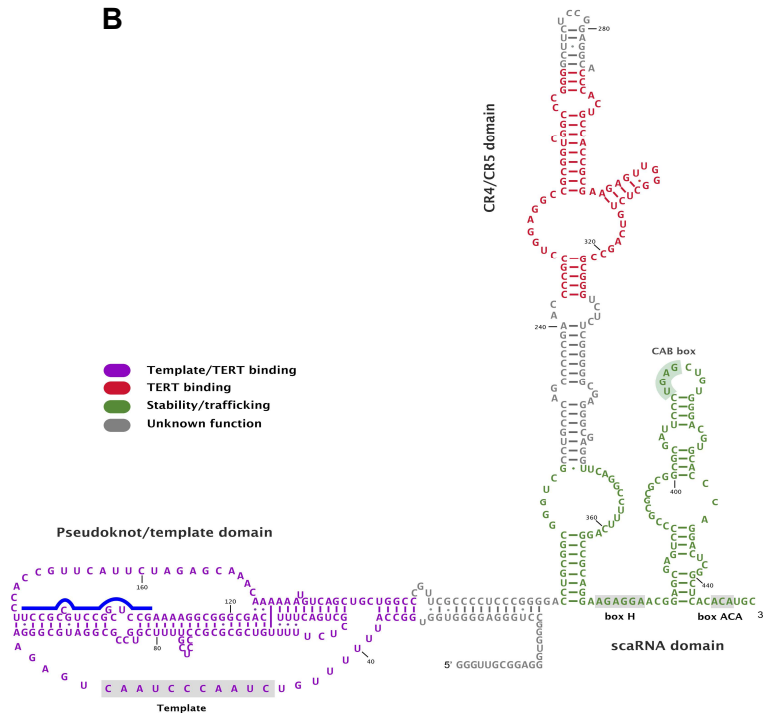

**C**

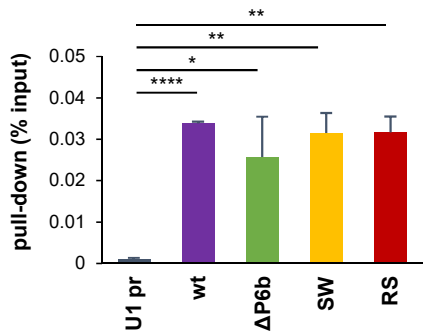

**Figure 1 - Figure supplement 2 - b**

c IFITM3

A

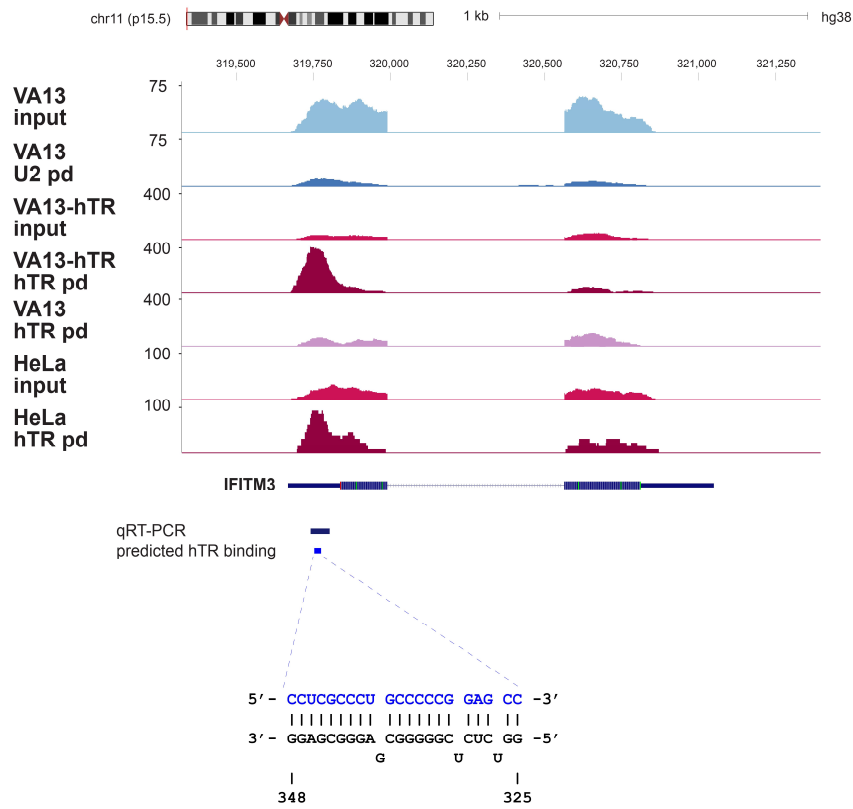

B

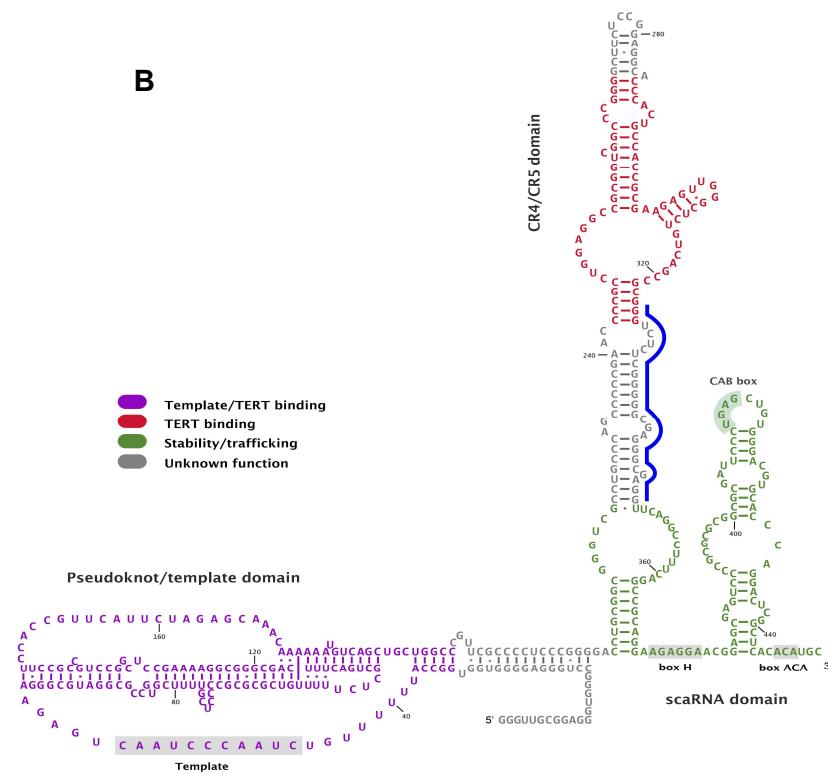

C

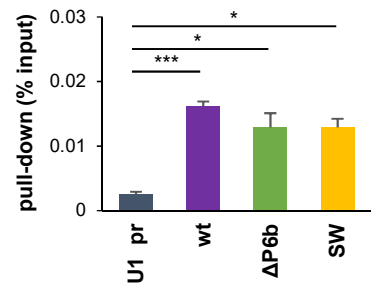

Figure 1 - Figure supplement 2 - c
