# Supplementary material for: The RNA interactome of human telomerase RNA reveals a coding-independent role for a histone mRNA in telomere homeostasis
Source: eLife journal article supplement (doi:10.7554/elife.40037), 2018-10-25
Supplement: supp [file elife-40037-supp-v1.zip › elife_poa_e40037_Figure_1_source_data_1.xlsx]

## Sheet: VA13-hTR cells
Rank	Chromosome	Peak start	Peak end	Gene	Peak location	-log10(q value) - JAMM peak finder	Enrichment (fold)
1	chrX	154354888	154355019	FLNA	CDS	41.6	7.6
2	chr6	26055948	26056113	HIST1H1C	CDS	52.3	19.9
3	chr1	109100314	109100571	SCARNA2	ncRNA	81.6	13.1
4	chrX	154399871	154399976	RPL10	CDS	33.5	5.8
5	chr3	184321450	184321587	EIF4G1	CDS	43.5	11.8
6	chr13	45340111	45340183	TPT1	CDS	23.5	4.2
7	chr9	110136245	110136348	AKAP2	CDS	32.9	23.8
8	chr3	184183541	184183676	AP2M1	CDS/3' UTR	42.9	7.9
9	chr21	37202459	37202522	TTC3	3' UTR	20.8	67.1
10	chr6	157201279	157201386	ARID1B	CDS	34.1	14.7
11	chr6	52498385	52498591	TRAM2	3' UTR	65.4	39.5
12	chrX	154400477	154400566	RPL10	CDS	28.5	6
13	chr6	44253278	44253369	HSP90AB1	CDS	29.1	5.1
14	chr16	30070220	30070310	ALDOA	CDS/3' UTR	28.8	6.2
15	chrX	41347947	41348040	DDX3X	3' UTR	29.8	47.1
16	chr20	24963869	24964001	APMAP	CDS	41.9	28.63
17	chr16	2519729	2519865	ATP6V0C	CDS/3' UTR	43.2	8.4
18	chr1	201484564	201484731	CSRP1	CDS/3' UTR	52.9	5.9
19	chr4	40815678	40815798	APBB2	3' UTR	38.2	30.2
20	chr8	130060914	130061032	ASAP1	CDS	37.5	9.3
21	chr3	47845756	47845830	DHX30	CDS	24.1	82.8
22	chr6	38703045	38703140	GLO1	5' UTR/CDS	30.4	19.8
23	chr7	150373400	150373583	REPIN1	3' UTR	58.1	21.8
24	chr6	160047833	160047901	IGF2R	CDS	22.3	13.5
25	chr1	180196318	180196397	QSOX1	CDS	25.6	12.2
26	chr8	133238605	133238707	NDRG1	3' UTR	32.6	11
27	chr13	45340767	45340799	TPT1	CDS	17.6	4.2
28	chr3	112638663	112638819	CCDC80	CDS	49.5	14.8
29	chr1	154602419	154602465	ADAR	CDS	25.3	25.2
30	chr12	6936829	6936992	ATN1	CDS	51.7	7.1
31	chr10	80169141	80169237	ANXA11	CDS	30.7	25.3
32	chr5	10258189	10258218	CCT5	CDS	15.9	9.1
33	chrX	65741628	65741708	MSN	3' UTR	25.9	11.8
34	chr3	49531695	49531951	DAG1	CDS	81.4	4.7
35	chr14	102029572	102029659	DYNC1H1	CDS	27.9	14.3
36	chr11	62572609	62572651	EEF1G	CDS	23.1	8.4
37	chr11	65920915	65920991	DRAP1	CDS	24.7	11
38	chr6	113860095	113860212	MARCKS	CDS	37.2	8
39	chr12	55727202	55727286	CD63	CDS	27	4.9
40	chr5	72199747	72199786	MAP1B	CDS	21.4	6.8
41	chr7	100886333	100886430	SRRT	CDS	31	10.1
42	chr12	6967397	6967488	SCARNA12	ncRNA	29.1	17.5
43	chr1	119916061	119916252	NOTCH2	CDS	60.6	5.7
44	chr7	143305017	143305124	CASP2	CDS/3' UTR	34.1	39.4
45	chr13	110512092	110512148	COL4A2	CDS	18.7	8.6
46	chr6	88612725	88612767	RNGTT	CDS	23.1	46.3
47	chr7	100678763	100678845	GNB2	CDS/3' UTR	26.4	7.2
48	chr17	7513143	7513354	POLR2A	CDS	67	10.9
49	chr7	99365925	99366043	ARPC1A	3' UTR	37.5	7.9
50	chr11	319719	319792	IFITM3	3' UTR	23.8	6.5
51	chr20	63521531	63521605	PPDPF	CDS	24.1	7.3
52	chr9	35682032	35682079	TPM2	3' UTR	25.8	14.3
53	chrX	53604627	53604662	HUWE1	CDS	19.2	10.8
54	chr20	50082273	50082398	UBE2V1	3' UTR	39.7	9
55	chr5	150554106	150554218	NDST1	3' UTR	35.7	12.3
56	chr18	35140621	35140748	MAPRE2	3' UTR	40.4	25.3
57	chr10	100347172	100347246	SCD	5' UTR	24.1	7.1
58	chr7	36406247	36406294	ANLN	CDS	25.8	12.1
59	chr6	7883065	7883141	TXNDC5	3' UTR	24.7	12.1
60	chr9	88476434	88476495	SPIN1	3' UTR	20.2	23.9
61	chr8	47836404	47836453	PRKDC	CDS	26.8	5.1
62	chr3	127690421	127690529	MGLL	3' UTR	34.4	17.8
63	chr1	39413912	39414137	MACF1	CDS	71.4	12.6
64	chr7	101138005	101138055	SERPINE1	3' UTR	16.8	9.5
65	chr18	49814318	49814403	SCARNA17	ncRNA	27.3	22.9
66	chr5	177331859	177331966	LMAN2	3' UTR	34.1	29
67	chr3	48469096	48469194	SHISA5	CDS	31.3	5.4
68	chr21	44326934	44327054	PFKL	3' UTR	38.2	5.2
69	chr6	113857484	113857541	MARCKS	5' UTR	19	9.8
70	chr8	23297912	23297990	LOXL2	3' UTR	25.3	4.8
71	chr1	24654921	24654965	SRRM1	CDS	24.2	23.9
72	chr1	63634905	63635013	PGM1	CDS	34.4	15.1
73	chr1	24841115	24841195	CLIC4	3' UTR	25.9	10.8
74	chr6	27867152	27867198	HIST1H1B	CDS	25.3	7.7
75	chr10	93333818	93333904	MYOF	CDS	27.6	10.2
76	chr10	102479908	102479992	ACTR1A	3' UTR	27	8
77	chr16	28835108	28835255	ATXN2L	CDS	46.6	5.4
78	chr5	112842349	112842417	APC	CDS/3' UTR	22.3	38.6
79	chr11	74034121	74034188	C2CD3	CDS/3' UTR	22	60.71
80	chr14	104719384	104719489	INF2	3' UTR	33.5	15.3
81	chr10	72368108	72368203	MICU1	3' UTR	30.4	17.6
82	chr15	43800663	43800717	HYPK	CDS	18	12.4
83	chr10	102382261	102382336	GBF1	CDS	24.41	10.4

## Sheet: HeLa cells
Rank	Chromosome	Peak start	Peak end	Gene	Peak location	-log10(q value) - JAMM peak finder	Enrichment (fold)
1	chr1	109100354	109100578	SCARNA2	ncRNA	71.55	31.6956
2	chr18	49814307	49814437	SCARNA17	ncRNA	41.7957	31.2586
3	chr8	27672570	27672917	SCARA3	3' UTR	110.537	5.40272
4	chrX	154399877	154399937	RPL10	CDS	19.6682	4.805
5	chr6	26056044	26056110	HIST1H1C	CDS	21.5199	6.60285
6	chr12	6967390	6967510	SCARNA12	ncRNA	38.5924	27.7854
7	chrX	153952715	153952962	HCFC1	CDS	78.8521	16.4186
8	chr3	184183611	184183698	AP2M1	3' UTR	28.0367	5.55708
9	chr2	233288796	233288892	SCARNA6	ncRNA	30.9067	10.0336
10	chr11	62572627	62572675	EEF1G	CDS	26.3214	4.50574
11	chr1	149851288	149851381	HIST2H2AA4	CDS	29.9482	55.5708
12	chrX	154365386	154365431	FLNA	CDS	24.6275	8.37648
13	chr6	44253305	44253357	HSP90AB1	CDS	17.247	4.78273
14	chr16	30070224	30070296	ALDOA	3' UTR	23.3758	5.58902
15	chrX	65741196	65741248	MSN	3' UTR	17.247	9.72489
16	chr12	6766602	6766653	PTMS	5' UTR	16.9287	17.5974
