# Supplementary material for: The RNA interactome of human telomerase RNA reveals a coding-independent role for a histone mRNA in telomere homeostasis
Source: eLife journal article supplement (doi:10.7554/elife.40037), 2018-10-25
Supplement: supp [file elife-40037-supp-v1.zip › elife_poa_e40037_Figure_6_source_data_1.xlsx]

## Sheet: Sheet1
Clone name	Category	HIST1H1C mRNA over-expression (%) - Figure 6A	hTR expression (%) - Figure 6D	beta-galactosidase positive cells (%) - Figure 6D and 6E	number of cells evaluated (beta-galactosidase staining)	mean telomere length (kb) - Figure 6C and Figure 6 - Figure supplement 2	short telomeres (below 1.6 kb) (%) - Figure 6C and Figure 6 - Figure supplement 2	threshold of shortest 20% telomeres (kb) - Figure 6 - Figure supplement 2
A3	HIST1H1C baseline	6.37401	131.674	6.8326	4460	2.3	29.63	1.31
A11	HIST1H1C high	22.6372	102.919	15.1834	4287	1.93	40	1.06
C4	HIST1H1C baseline	-6.37315	154.867	13.4335	2846	2.44	31	1.01
C5	HIST1H1C baseline	1.69349	55.0764	7.6139	4310	2.68	13.24	1.69
C7	HIST1H1C high	25.18	45.2668	21.4956	3070	1.62	50.62	0.69
C11	HIST1H1C baseline	-14.6168	138.589	17.1212	2313	3.14	16.46	1.95
C12	HIST1H1C baseline	0.416351	149.488	8.42983	4134	2.38	26.97	1.22
D2	HIST1H1C baseline	6.85618	97.7774	11.4603	5854	2.55	27.96	1.31
D3	HIST1H1C high	35.819	139.311	17.6906	4396	1.95	37.66	1.15
D6	HIST1H1C high	28.3466	66.6446	10.6944	3781	2.2	28.4	1.31
D8	HIST1H1C baseline	2.62065	105.362	6.44223	5550	2.37	24.21	1.4
D10	HIST1H1C high	34.7871	109.315	14.2241	6257	2.03	38.27	1.1
D12	HIST1H1C high	33.7236	91.0403	21.6794	5770	2.51	28.77	1.29
E3	HIST1H1C high	22.842	70.8074	18.9306	3720	1.38	58.9	0.26
E9	HIST1H1C high	20.1501	120.819	21.7096	2715	2.3	30.56	1.22
E11	HIST1H1C baseline	6.98951	101.139	4.39512	4748	2.18	33.33	1.07
F1	HIST1H1C baseline	-5.48334	88.9332	7.04131	4853	2.27	27.85	1.19
G3	HIST1H1C baseline	13.2671	127.176	10.834	5154	2.95	12.66	1.96
G5	HIST1H1C high	99.2592	87.7759	47.9662	4069	1.53	56.67	0.18
G7	HIST1H1C high	22.4127	70.0048	23.8701	2853	2.43	28.09	1.19
G9	HIST1H1C high	38.2019	80.2866	15.949	3945	2.02	38.64	0.93
H5	HIST1H1C high	46.3978	112.245	14.1606	4293	2.96	13.58	1.86
H6	HIST1H1C baseline	4.52704	96.7006	12.1478	4519	2.03	33.72	1.13
H8	HIST1H1C baseline	-3.76059	56.9454	13.7702	4339	2.11	36.46	0.67
