# Supplementary material for: The RNA interactome of human telomerase RNA reveals a coding-independent role for a histone mRNA in telomere homeostasis
Source: eLife journal article supplement (doi:10.7554/elife.40037), 2018-10-25
Supplement: supp [file elife-40037-supp-v1.zip › elife_poa_e40037_Supplementary_File_1..xlsx]

## Sheet: VA13_hTR_pd_filtered
Chrom	Start	End	Name	Score	Strand	Peak score	pVal	qVal	Point-source	Gene	Peak position
chrX	154354888	154355019	chrX.154354888	6218.12	-	541088	43.7483	41.6092	81	FLNA	CDS
chr6	26055948	26056113	chr6.26055948	5960.37	-	518659	54.8736	52.3153	134	HIST1H1C	CDS
chr1	109100314	109100571	chr1.109100314	5945.27	+	517345	84.937	81.6005	243	SCARNA2	ncRNA
chrX	154399871	154399976	chrX.154399871	3695.14	+	321544	35.2308	33.4964	61	RPL10	CDS
chr3	184321450	184321587	chr3b.93321450	3563.79	+	310114	45.7125	43.4642	81	EIF4G1	CDS
chr13	45340111	45340183	chr13.45340111	3152.87	-	274357	24.3983	23.5217	3	TPT1	CDS
chr9	110136245	110136348	chr9.110136245	2889.7	+	251457	34.5751	32.8645	44	AKAP2	CDS
chr3	184183541	184183676	chr3b.93183541	2600.86	+	226323	45.0578	42.8752	100	AP2M1	CDS/3' UTR
chr21	37202459	37202522	chr21.37202459	2381.13	+	207202	21.437	20.8046	1	TTC3	3' UTR
chr6	157201279	157201386	chr6b.72201279	1980.54	+	172344	35.8864	34.1211	85	ARID1B	CDS
chr6	52498385	52498591	chr6.52498385	1876.96	-	163331	68.2768	65.3797	84	TRAM2	3' UTR
chrX	154400477	154400566	chrX.154400477	1841.71	+	160263	29.9827	28.5066	44	RPL10	CDS
chr6	44253278	44253369	chr6.44253278	1761.97	+	153325	30.639	29.1383	42	HSP90AB1	CDS
chr16	30070220	30070310	chr16.30070220	1749.69	+	152256	30.3109	28.8226	36	ALDOA	CDS/3' UTR
chrX	41347947	41348040	chrX.41347947	1659.05	+	144369	31.2953	29.7668	24	DDX3X	3' UTR
chr20	24963869	24964001	chr20.24963869	1610.48	-	140142	44.0757	41.9226	63	APMAP	CDS
chr16	2519729	2519865	chr16.2519729	1526.59	+	132843	45.3852	43.1871	57	ATP6V0C	CDS/3' UTR
chr1	201484564	201484731	chr1b.76484564	1524.56	-	132666	55.5276	52.9114	93	CSRP1	CDS/3' UTR
chr4	40815678	40815798	chr4.40815678	1478.95	-	128697	40.1461	38.1618	102	APBB2	3' UTR
chr8	130060914	130061032	chr8.130060914	1449.14	-	126103	39.4909	37.5347	52	ASAP1	CDS
chr3	47845756	47845830	chr3.47845756	1344.84	+	117027	25.0559	24.1369	29	DHX30	CDS
chr6	38703045	38703140	chr6.38703045	1253.53	-	109082	31.9514	30.3785	49	GLO1	5' UTR/CDS
chr7	150373400	150373583	chr7.150373400	1235.98	+	107554	60.7593	58.0512	69	REPIN1	3' UTR
chr6	160047833	160047901	chr6b.75047833	1222.19	+	106354	23.0827	22.3174	51	IGF2R	CDS
chr1	180196318	180196397	chr1b.55196318	1218.66	+	106048	26.699	25.5962	50	QSOX1	CDS
chr8	133238605	133238707	chr8.133238605	1206.27	-	104969	34.2472	32.5567	52	NDRG1	3' UTR
chr13	45340767	45340799	chr13.45340767	1183.24	-	102965	17.962	17.5628	2	TPT1	CDS
chr3	112638663	112638819	chr3b.21638663	1157.39	-	100715	51.9297	49.4964	52	CCDC80	CDS
chr1	154602419	154602465	chr1b.29602419	1140.8	-	99272.2	26.3126	25.2761	5	ADAR	CDS
chr12	6936829	6936992	chr12.6936829	1122.77	+	97703.3	54.2194	51.7123	53	ATN1	CDS
chr10	80169141	80169237	chr10.80169141	1112.47	-	96806.7	32.2795	30.6815	36	ANXA11	CDS
chr5	10258189	10258218	chr5.10258189	1100.35	+	95752.5	16.1771	15.8883	21	CCT5	CDS
chrX	65741628	65741708	chrX.65741628	1060.92	+	92320.8	27.0275	25.8665	12	MSN	3' UTR
chr3	49531695	49531951	chr3.49531695	1017.97	+	88583.5	84.6104	81.3709	61	DAG1	CDS
chr14	102029572	102029659	chr14.102029572	1002.96	+	87277.6	29.3262	27.8915	23	DYNC1H1	CDS
chr11	62572609	62572651	chr11.62572609	1001.75	-	87172.2	23.924	23.0951	31	EEF1G	CDS
chr11	65920915	65920991	chr11.65920915	981.273	+	85390.4	25.7132	24.7338	32	DRAP1	CDS
chr6	113860095	113860212	chr6b.28860095	954.901	+	83095.6	39.1633	37.2335	18	MARCKS	CDS
chr12	55727202	55727286	chr12.55727202	951.011	-	82757	28.3412	26.9698	13	CD63	CDS
chr5	72199747	72199786	chr5.72199747	919.269	+	79995	22.1338	21.453	2	MAP1B	CDS
chr7	100886333	100886430	chr7.100886333	911.021	+	79277.2	32.6075	30.9974	88	SRRT	CDS
chr12	6967397	6967488	chr12.6967397	907.155	-	78940.9	30.639	29.1383	89	SCARNA12	ncRNA
chr1	119916061	119916252	chr1.119916061	891.784	-	77603.3	63.3744	60.612	67	NOTCH2	CDS
chr7	143305017	143305124	chr7.143305017	862.717	+	75073.9	35.8864	34.1211	38	CASP2	CDS/3' UTR
chr13	110512092	110512148	chr13.110512092	846.329	+	73647.9	19.1306	18.6581	17	COL4A2	CDS
chr6	88612725	88612767	chr6b.3612725	844.346	-	73475.4	23.924	23.0951	7	RNGTT	CDS
chr7	100678763	100678845	chr7.100678763	786.618	+	68452	27.6845	26.4335	41	GNB2	CDS/3' UTR
chr17	7513143	7513354	chr17.7513143	776.3	+	67554.2	69.9106	66.9722	127	POLR2A	CDS
chr7	99365925	99366043	chr7.99365925	776.121	+	67538.6	39.4909	37.5347	30	ARPC1A	3' UTR
chr11	319719	319792	chr11.319719	775.268	-	67464.3	24.7271	23.814	15	IFITM3	3' UTR
chr20	63521531	63521605	chr20.63521531	765.474	+	66612.1	25.0559	24.1369	47	PPDPF	CDS
chr9	35682032	35682079	chr9.35682032	750.511	-	65310.1	26.91	25.7963	26	TPM2	3' UTR
chrX	53604627	53604662	chrX.53604627	748.559	-	65140.2	19.7489	19.2358	25	HUWE1	CDS
chr20	50082273	50082398	chr20.50082273	742.337	-	64598.8	41.7837	39.7085	83	UBE2V1	3' UTR
chr5	150554106	150554218	chr5b.66554106	740.445	+	64434.2	37.5251	35.6622	45	NDST1	3' UTR
chr18	35140621	35140748	chr18.35140621	740.102	+	64404.3	42.4386	40.3514	48	MAPRE2	3' UTR
chr10	100347172	100347246	chr10.100347172	731.667	+	63670.3	25.0559	24.1369	32	SCD	5' UTR
chr7	36406247	36406294	chr7.36406247	731.304	+	63638.7	26.91	25.7963	6	ANLN	CDS
chr6	7883065	7883141	chr6.7883065	730.381	-	63558.4	25.7132	24.7338	39	TXNDC5	3' UTR
chr9	88476434	88476495	chr9.88476434	727.298	+	63290.1	20.7784	20.1915	0	SPIN1	3' UTR
chr8	47836404	47836453	chr8.47836404	725.291	-	63115.5	28.1051	26.8228	36	PRKDC	CDS
chr3	127690421	127690529	chr3b.36690421	722.457	-	62868.9	36.2142	34.428	41	MGLL	3' UTR
chr1	39413912	39414137	chr1.39413912	703.549	+	61223.5	74.4848	71.3914	36	MACF1	CDS
chr7	101138005	101138055	chr7.101138005	698.455	+	60780.2	17.1508	16.8005	17	SERPINE1	3' UTR
chr18	49814318	49814403	chr18.49814318	689.249	+	59979.2	28.6696	27.2702	58	SCARNA17	ncRNA
chr5	177331859	177331966	chr5b.93331859	685.886	-	59686.6	35.8864	34.1211	48	LMAN2	3' UTR
chr3	48469096	48469194	chr3.48469096	676.027	-	58828.7	32.9355	31.3088	83	SHISA5	CDS
chr21	44326934	44327054	chr21.44326934	653.871	+	56900.7	40.1461	38.1618	41	PFKL	3' UTR
chr6	113857484	113857541	chr6b.28857484	650.416	+	56600	19.4603	18.9551	5	MARCKS	5' UTR
chr8	23297912	23297990	chr8.23297912	647.068	-	56308.7	26.3705	25.2826	20	LOXL2	3' UTR
chr1	24654921	24654965	chr1.24654921	643.159	+	55968.6	25.1181	24.192	7	SRRM1	CDS
chr1	63634905	63635013	chr1.63634905	641.261	+	55803.4	36.2142	34.428	17	PGM1	CDS
chr1	24841115	24841195	chr1.24841115	640.837	+	55766.5	27.0275	25.8665	41	CLIC4	3' UTR
chr6	27867152	27867198	chr6.27867152	636.203	-	55363.3	26.3126	25.2761	22	HIST1H1B	CDS
chr10	93333818	93333904	chr10.93333818	626.33	-	54504.1	28.9979	27.5832	30	MYOF	CDS
chr10	102479908	102479992	chr10.102479908	613.155	-	53357.7	28.3412	26.9698	46	ACTR1A	3' UTR
chr16	28835108	28835255	chr16.28835108	609.047	+	53000.2	48.9852	46.5908	13	ATXN2L	CDS
chr5	112842349	112842417	chr5b.28842349	607.845	+	52895.6	23.0828	22.3174	29	APC	CDS/3' UTR
chr11	74034121	74034188	chr11.74034121	602.079	-	52393.9	22.7537	22.0076	63	C2CD3	CDS/3' UTR
chr14	104719384	104719489	chr14.104719384	599.288	+	52151	35.2308	33.4964	10	INF2	3' UTR
chr10	72368108	72368203	chr10.72368108	589.11	-	51265.4	31.9514	30.3785	42	MICU1	3' UTR
chr15	43800663	43800717	chr15.43800663	580.154	+	50486	18.471	18.0359	27	HYPK	CDS
chr10	102382261	102382336	chr10.102382261	578.128	+	50309.8	25.3846	24.4178	30	GBF1	CDS

## Sheet: HeLa_hTR_pd_filtered
Chrom	Start	End	Name	Score	Strand	Peak score	pVal	qVal	Point-source	Gene	Peak position	Note
chr3	169764264	169764490	chr3b.78764264	6906.03	-	1.97205e+06	85.3327	82.3607	138			region flanking TERC gene; artefact possibly due to noisy hTR processing
chr1	109100354	109100578	chr1.109100354	3874.17	+	1.10629e+06	74.1581	71.55	188	SCARNA2	ncRNA
chr18	49814307	49814437	chr18.49814307	2898.53	+	827690	43.4209	41.7957	85	SCARNA17	ncRNA
chr3	169765096	169765166	chr3b.78765096	1254.04	-	358096	27.0013	25.8343	21			region flanking TERC gene; artefact possibly due to noisy hTR transcription
chr8	27672570	27672917	chr8.27672570	990.604	+	282871	114.317	110.537	172	SCARA3	3' UTR
chrX	154399877	154399937	chrX.154399877	880.603	+	251460	20.449	19.6682	14	RPL10	CDS
chr6	26056044	26056110	chr6.26056044	818.575	-	233748	22.4246	21.5199	38	HIST1H1C	CDS
chr12	6967390	6967510	chr12.6967390	779.539	-	222601	40.1461	38.5924	99	SCARNA12	ncRNA
chrX	153952715	153952962	chrX.153952715	529.618	-	151235	81.6711	78.8521	107	HCFC1	CDS
chr3	184183611	184183698	chr3b.93183611	527.265	+	150563	29.3262	28.0367	33	AP2M1	3' UTR
chr2	233288796	233288892	chr2b.139288796	520.303	+	148575	32.2795	30.9067	27	SCARNA6	ncRNA
chr11	62572627	62572675	chr11.62572627	382.288	-	109164	27.5075	26.3214	13	EEF1G	CDS
chr1	149851288	149851381	chr1b.24851288	367.135	-	104837	31.2953	29.9482	54	HIST2H2AA4	CDS
chrX	154365386	154365431	chrX.154365386	366.279	-	104593	25.7153	24.6275	25	FLNA	CDS
chr6	44253305	44253357	chr6.44253305	261.11	+	74561.2	17.8111	17.247	38	HSP90AB1	CDS
chr16	30070224	30070296	chr16.30070224	215.53	+	61545.5	24.3983	23.3758	25	ALDOA	3' UTR
chrX	65741196	65741248	chrX.65741196	212.537	+	60690.9	17.8111	17.247	0	MSN	3' UTR
chr12	6766602	6766653	chr12.6766602	201.968	+	57672.9	17.481	16.9287	46	PTMS	5' UTR

## Sheet: JAMM_VA13_hTR_all
Chrom	Start	End	Name	Score	Strand	Peak score	pVal	qVal	Point-source
chr10	17229391	17229608	chr10.17229391	10000	.	870177	71.8711	68.8869	151
chrX	154354888	154355019	chrX.154354888	6218.12	.	541088	43.7483	41.6092	81
chr6	26055948	26056113	chr6.26055948	5960.37	.	518659	54.8736	52.3153	134
chr1	109100314	109100571	chr1.109100314	5945.27	.	517345	84.937	81.6005	243
chr7	5529185	5529453	chr7.5529185	4511.57	.	392588	88.1015	84.6402	35
chr22	36282289	36282720	chr22.36282289	3824.63	.	332812	141.725	137.787	312
chrX	154399871	154399976	chrX.154399871	3695.14	.	321544	35.2308	33.4964	61
chr3	184321450	184321587	chr3b.93321450	3563.79	.	310114	45.7125	43.4642	81
chr3	129314838	129315037	chr3b.38314838	3256.06	.	283336	65.9892	63.1299	42
chr9	35657866	35657957	chr9.35657866	3187.45	.	277367	30.639	29.1383	54
chr6	34245036	34245200	chr6.34245036	3173.73	.	276173	54.5465	52.006	111
chr13	45340111	45340183	chr13.45340111	3152.87	.	274357	24.3983	23.5217	3
chr14	68789615	68789954	chr14.68789615	2993.4	.	260481	111.707	108.069	194
chr9	110136245	110136348	chr9.110136245	2889.7	.	251457	34.5751	32.8645	44
chr8	143915829	143915982	chr8.143915829	2884.75	.	251026	50.9483	48.5284	75
chr13	45341065	45341140	chr13.45341065	2626.71	.	228572	25.3846	24.4178	54
chr3	184183541	184183676	chr3b.93183541	2600.86	.	226323	45.0578	42.8752	100
chr21	37202459	37202522	chr21.37202459	2381.13	.	207202	21.437	20.8046	1
chr14	20343231	20343340	chr14.20343231	2337.52	.	203407	36.5419	34.7338	97
chr6	26156634	26156806	chr6.26156634	2316.92	.	201615	57.1627	54.503	92
chr15	72199086	72199161	chr15.72199086	2129.98	.	185348	25.3846	24.4178	26
chrX	154354410	154354525	chrX.154354410	2047.15	.	178140	38.5081	36.5949	59
chr1	152032552	152032688	chr1b.27032552	1998.08	.	173870	45.3852	43.1871	28
chr2	84906479	84906590	chr2.84906479	1991.89	.	173332	37.1974	35.3453	67
chr6	157201279	157201386	chr6b.72201279	1980.54	.	172344	35.8864	34.1211	85
chr15	69452911	69452996	chr15.69452911	1967.23	.	171186	28.6696	27.2702	30
chr6	52498385	52498591	chr6.52498385	1876.96	.	163331	68.2768	65.3797	84
chrX	154400477	154400566	chrX.154400477	1841.71	.	160263	29.9827	28.5066	44
chr7	5529568	5529698	chr7.5529568	1802.89	.	156886	43.4209	41.3149	88
chr15	72199562	72199649	chr15.72199562	1778.45	.	154759	29.3262	27.8915	14
chr6	44253278	44253369	chr6.44253278	1761.97	.	153325	30.639	29.1383	42
chr16	30070220	30070310	chr16.30070220	1749.69	.	152256	30.3109	28.8226	36
chrX	41347947	41348040	chrX.41347947	1659.05	.	144369	31.2953	29.7668	24
chr14	68874726	68874862	chr14.68874726	1610.5	.	140144	45.3852	43.1871	109
chr20	24963869	24964001	chr20.24963869	1610.48	.	140142	44.0757	41.9226	63
chrX	154362298	154362346	chrX.154362298	1573.17	.	136895	27.5075	26.3196	8
chr1	201483640	201483831	chr1b.76483640	1550.25	.	134901	63.3744	60.612	98
chr16	2519729	2519865	chr16.2519729	1526.59	.	132843	45.3852	43.1871	57
chr1	201484564	201484731	chr1b.76484564	1524.56	.	132666	55.5276	52.9114	93
chr2	231712951	231713025	chr2b.137712951	1496.39	.	130214	25.0559	24.1369	33
chr4	40815678	40815798	chr4.40815678	1478.95	.	128697	40.1461	38.1618	102
chrX	154348698	154348766	chrX.154348698	1473.94	.	128261	23.0828	22.3174	0
chr20	36549551	36549716	chr20.36549551	1453.89	.	126517	54.8736	52.3153	114
chr8	130060914	130061032	chr8.130060914	1449.14	.	126103	39.4909	37.5347	52
chr3	124968133	124968180	chr3b.33968133	1354.93	.	117905	26.91	25.7963	16
chr7	5527371	5527471	chr7.5527371	1352.72	.	117713	33.5914	31.9248	35
chr10	17229298	17229336	chr10.17229298	1349.76	.	117455	21.5374	20.899	25
chr3	47845756	47845830	chr3.47845756	1344.84	.	117027	25.0559	24.1369	29
chr6	38703045	38703140	chr6.38703045	1253.53	.	109082	31.9514	30.3785	49
chr1	43591263	43591406	chr1.43591263	1251.28	.	108886	47.6763	45.3288	59
chr16	30069904	30070081	chr16.30069904	1243.6	.	108217	58.7976	56.1144	115
chr7	150373400	150373583	chr7.150373400	1235.98	.	107554	60.7593	58.0512	69
chr2	215435916	215435981	chr2b.121435916	1223.61	.	106478	22.0955	21.4202	16
chr6	160047833	160047901	chr6b.75047833	1222.19	.	106354	23.0827	22.3174	51
chr1	180196318	180196397	chr1b.55196318	1218.66	.	106048	26.699	25.5962	50
chr8	133238605	133238707	chr8.133238605	1206.27	.	104969	34.2472	32.5567	52
chr15	72200546	72200605	chr15.72200546	1196.22	.	104095	20.1195	19.5718	19
chr7	5527781	5527872	chr7.5527781	1189.61	.	103519	30.639	29.1383	82
chr13	45340767	45340799	chr13.45340767	1183.24	.	102965	17.962	17.5628	2
chr3	112638663	112638819	chr3b.21638663	1157.39	.	100715	51.9297	49.4964	52
chr1	154602419	154602465	chr1b.29602419	1140.8	.	99272.2	26.3126	25.2761	5
chrX	12975141	12975169	chrX.12975141	1129.85	.	98318.8	15.5826	15.3205	18
chr12	6936829	6936992	chr12.6936829	1122.77	.	97703.3	54.2194	51.7123	53
chr10	80169141	80169237	chr10.80169141	1112.47	.	96806.7	32.2795	30.6815	36
chr5	10258189	10258218	chr5.10258189	1100.35	.	95752.5	16.1771	15.8883	21
chr6	34245756	34245819	chr6.34245756	1075.29	.	93571.3	21.437	20.8046	39
chrX	65741628	65741708	chrX.65741628	1060.92	.	92320.8	27.0275	25.8665	12
chr8	100706720	100706790	chr8.100706720	1058.62	.	92120.9	23.7406	22.9177	45
chr2	55049892	55050030	chr2.55049892	1051.87	.	91533.8	46.0398	43.7546	69
chr3	49531695	49531951	chr3.49531695	1017.97	.	88583.5	84.6104	81.3709	61
chr1	26281186	26281351	chr1.26281186	1010.17	.	87904.9	54.8736	52.3153	72
chr14	102029572	102029659	chr14.102029572	1002.96	.	87277.6	29.3262	27.8915	23
chr11	62572609	62572651	chr11.62572609	1001.75	.	87172.2	23.924	23.0951	31
chr8	100721434	100721524	chr8.100721434	993.056	.	86415.7	30.3109	28.8226	38
chr8	143925114	143925285	chr8.143925114	988.115	.	85985.8	56.8357	54.1983	8
chr11	65920915	65920991	chr11.65920915	981.273	.	85390.4	25.7132	24.7338	32
chr1	153535299	153535364	chr1b.28535299	963.332	.	83829.2	22.0955	21.4202	40
chr5	179836809	179836844	chr5b.95836809	958.83	.	83437.4	19.7489	19.2358	14
chr6	113860095	113860212	chr6b.28860095	954.901	.	83095.6	39.1633	37.2335	18
chr12	55727202	55727286	chr12.55727202	951.011	.	82757	28.3412	26.9698	13
chr5	72196670	72196768	chr5.72196670	950.455	.	82708.7	32.9355	31.3088	32
chr5	72199747	72199786	chr5.72199747	919.269	.	79995	22.1338	21.453	2
chr1	633995	634079	chr1.633995	917.068	.	79803.4	28.3412	26.9698	14
chr7	100886333	100886430	chr7.100886333	911.021	.	79277.2	32.6075	30.9974	88
chr12	6967397	6967488	chr12.6967397	907.155	.	78940.9	30.639	29.1383	89
chr5	172951392	172951485	chr5b.88951392	906.66	.	78897.8	31.2953	29.7668	11
chrX	154349451	154349521	chrX.154349451	902.707	.	78553.8	23.7406	22.9177	47
chr9	137242729	137242807	chr9.137242729	895.721	.	77945.8	26.3705	25.2826	41
chrX	154362456	154362497	chrX.154362456	894.297	.	77822	23.3271	22.556	19
chr1	119916061	119916252	chr1.119916061	891.784	.	77603.3	63.3744	60.612	67
chr5	177483452	177483645	chr5b.93483452	886.87	.	77175.6	64.0281	61.2036	7
chr22	42615300	42615382	chr22.42615300	872.401	.	75916.6	27.6845	26.4335	14
chr7	143305017	143305124	chr7.143305017	862.717	.	75073.9	35.8864	34.1211	38
chrX	154348890	154349003	chrX.154348890	859.347	.	74780.7	37.8528	35.9712	81
chr13	110512092	110512148	chr13.110512092	846.329	.	73647.9	19.1306	18.6581	17
chr6	88612725	88612767	chr6b.3612725	844.346	.	73475.4	23.924	23.0951	7
chr8	38413239	38413363	chr8.38413239	825.999	.	71878.9	41.4562	39.4042	114
chr16	28836753	28836912	chr16.28836753	817.155	.	71109.3	52.9111	50.464	47
chr8	143930421	143930492	chr8.143930421	810.787	.	70555.1	24.0695	23.1988	14
chrX	154362113	154362153	chrX.154362113	804.698	.	70025.3	22.7304	22.0076	25
chr10	97432573	97432604	chr10.97432573	798.918	.	69522.3	17.3668	17.0077	3
chr2	240466679	240466825	chr2b.146466679	796.55	.	69316.2	48.658	46.2758	58
chr1	150294241	150294347	chr1b.25294241	793.612	.	69060.6	35.5586	33.802	48
chr7	100678763	100678845	chr7.100678763	786.618	.	68452	27.6845	26.4335	41
chr4	82373770	82373851	chr4.82373770	782.901	.	68128.5	27.356	26.1802	64
chr17	7513143	7513354	chr17.7513143	776.3	.	67554.2	69.9106	66.9722	127
chr7	99365925	99366043	chr7.99365925	776.121	.	67538.6	39.4909	37.5347	30
chr11	319719	319792	chr11.319719	775.268	.	67464.3	24.7271	23.814	15
chr8	143924875	143925007	chr8.143924875	767.438	.	66783	44.0757	41.9226	64
chr8	144311521	144311623	chr8.144311521	765.481	.	66612.7	34.2472	32.5567	70
chr20	63521531	63521605	chr20.63521531	765.474	.	66612.1	25.0559	24.1369	47
chr2	215375266	215375370	chr2b.121375266	765.044	.	66574.7	34.9029	33.1793	82
chr14	102049807	102049902	chr14.102049807	763.143	.	66409.3	31.9514	30.3785	49
chr1	159918757	159918805	chr1b.34918757	753.566	.	65575.9	27.5075	26.3196	16
chr9	35682032	35682079	chr9.35682032	750.511	.	65310.1	26.91	25.7963	26
chrX	53604627	53604662	chrX.53604627	748.559	.	65140.2	19.7489	19.2358	25
chr6	158095811	158095924	chr6b.73095811	745.207	.	64848.5	37.8528	35.9712	41
chr19	48966654	48966763	chr19.48966654	742.927	.	64650.1	36.5419	34.7338	33
chr20	50082273	50082398	chr20.50082273	742.337	.	64598.8	41.7837	39.7085	83
chr11	61967501	61967584	chr11.61967501	741.106	.	64491.6	28.0129	26.739	43
chr5	150554106	150554218	chr5b.66554106	740.445	.	64434.2	37.5251	35.6622	45
chr18	35140621	35140748	chr18.35140621	740.102	.	64404.3	42.4386	40.3514	48
chr15	72199393	72199467	chr15.72199393	739.922	.	64388.6	25.0559	24.1369	72
chr10	100347172	100347246	chr10.100347172	731.667	.	63670.3	25.0559	24.1369	32
chr7	36406247	36406294	chr7.36406247	731.304	.	63638.7	26.91	25.7963	6
chr6	7883065	7883141	chr6.7883065	730.381	.	63558.4	25.7132	24.7338	39
chr9	88476434	88476495	chr9.88476434	727.298	.	63290.1	20.7784	20.1915	0
chr20	45898432	45898528	chr20.45898432	726.87	.	63252.8	32.2795	30.6815	50
chr8	47836404	47836453	chr8.47836404	725.291	.	63115.5	28.1051	26.8228	36
chrX	154354688	154354713	chrX.154354688	724.122	.	63013.8	13.8008	13.6092	11
chr3	127690421	127690529	chr3b.36690421	722.457	.	62868.9	36.2142	34.428	41
chr7	2661890	2662115	chr7.2661890	707.686	.	61583.6	74.4848	71.3914	190
chr1	39413912	39414137	chr1.39413912	703.549	.	61223.5	74.4848	71.3914	36
chr3	50258957	50259105	chr3.50258957	702.315	.	61116.2	48.2694	45.9107	104
chr7	101138005	101138055	chr7.101138005	698.455	.	60780.2	17.1508	16.8005	17
chr1	149923585	149923694	chr1b.24923585	696.514	.	60611.4	36.5419	34.7338	0
chrX	154360016	154360121	chrX.154360016	693.781	.	60373.5	35.2308	33.4964	47
chr5	17275757	17275808	chr5.17275757	689.673	.	60016.1	17.481	17.098	39
chr18	49814318	49814403	chr18.49814318	689.249	.	59979.2	28.6696	27.2702	58
chr5	177331859	177331966	chr5b.93331859	685.886	.	59686.6	35.8864	34.1211	48
chr3	48469096	48469194	chr3.48469096	676.027	.	58828.7	32.9355	31.3088	83
chr10	102657152	102657241	chr10.102657152	675.776	.	58806.8	29.9827	28.5066	55
chr10	97457189	97457268	chr10.97457189	668.825	.	58202	26.699	25.5962	12
chr1	228098679	228098802	chr1b.103098679	668.704	.	58191.4	41.1287	39.0878	24
chr12	6770771	6770866	chr12.6770771	666.658	.	58013.4	31.9515	30.3785	10
chr3	184317447	184317507	chr3b.93317447	659.303	.	57373.4	20.449	19.8681	41
chr10	124989526	124989587	chr10.124989526	658.478	.	57301.6	20.7786	20.1915	40
chr3	184174935	184174972	chr3b.93174935	656.433	.	57123.6	20.941	20.3472	18
chr21	44326934	44327054	chr21.44326934	653.871	.	56900.7	40.1461	38.1618	41
chr6	113857484	113857541	chr6b.28857484	650.416	.	56600	19.4603	18.9551	5
chr6	143826219	143826305	chr6b.58826219	649.662	.	56534.4	28.9979	27.5832	41
chr8	23297912	23297990	chr8.23297912	647.068	.	56308.7	26.3705	25.2826	20
chr1	24654921	24654965	chr1.24654921	643.159	.	55968.6	25.1181	24.192	7
chrX	135032929	135033018	chrX.135032929	641.812	.	55851.4	29.9827	28.5066	69
chr1	63634905	63635013	chr1.63634905	641.261	.	55803.4	36.2142	34.428	17
chr1	24841115	24841195	chr1.24841115	640.837	.	55766.5	27.0275	25.8665	41
chr6	27867152	27867198	chr6.27867152	636.203	.	55363.3	26.3126	25.2761	22
chr2	206160000	206160030	chr2b.112160000	630.865	.	54898.8	16.7718	16.4537	4
chr10	93333818	93333904	chr10.93333818	626.33	.	54504.1	28.9979	27.5832	30
chr1	150268764	150268866	chr1b.25268764	623.446	.	54253.2	34.2472	32.5567	67
chr6	73518741	73518781	chr6.73518741	619.28	.	53890.6	22.7304	22.0076	11
chr10	102479908	102479992	chr10.102479908	613.155	.	53357.7	28.3412	26.9698	46
chr6	138915897	138915934	chr6b.53915897	610.874	.	53159.2	20.941	20.3472	9
chr14	68789379	68789516	chr14.68789379	609.74	.	53060.5	45.7125	43.4642	75
chr16	28835108	28835255	chr16.28835108	609.047	.	53000.2	48.9852	46.5908	13
chr5	112842349	112842417	chr5b.28842349	607.845	.	52895.6	23.0828	22.3174	29
chr5	173317988	173318097	chr5b.89317988	605.391	.	52682.1	36.5419	34.7338	45
chr15	96337455	96337523	chr15.96337455	604.619	.	52614.9	23.0827	22.3174	18
chr4	6641087	6641131	chr4.6641087	604.424	.	52597.9	25.1181	24.192	2
chr3	127691769	127691805	chr3b.36691769	604.2	.	52578.5	20.3449	19.7906	12
chr11	74034121	74034188	chr11.74034121	602.079	.	52393.9	22.7537	22.0076	63
chr9	131197998	131198135	chr9.131197998	600.439	.	52251.2	45.7125	43.4642	65
chr3	23917946	23918025	chr3.23917946	599.371	.	52158.3	26.699	25.5962	23
chr14	104719384	104719489	chr14.104719384	599.288	.	52151	35.2308	33.4964	10
chrX	154364694	154364752	chrX.154364694	593.865	.	51679.1	19.7899	19.2491	10
chr10	72368108	72368203	chr10.72368108	589.11	.	51265.4	31.9514	30.3785	42
chrX	154359531	154359608	chrX.154359531	581.958	.	50643	26.0419	25.0162	18
chr15	43800663	43800717	chr15.43800663	580.154	.	50486	18.471	18.0359	27
chr8	140515453	140515544	chr8.140515453	579.677	.	50444.5	30.639	29.1383	15
chr10	102382261	102382336	chr10.102382261	578.128	.	50309.8	25.3846	24.4178	30
chr8	133238074	133238110	chr8.133238074	577.618	.	50265.4	20.3449	19.7906	0
chr21	46003940	46004025	chr21.46003940	575.371	.	50069.8	28.6696	27.2702	23
chr3	184171030	184171133	chr3b.93171030	571.994	.	49776	34.5751	32.8645	37
chrX	53379941	53380103	chrX.53379941	569.296	.	49541.2	53.8924	51.4011	67
chr1	85580957	85581043	chr1.85580957	562.976	.	48991.2	28.9979	27.5832	12
chr10	97717806	97717871	chr10.97717806	560.484	.	48774.4	22.0955	21.4202	21
chr1	85320798	85320880	chr1.85320798	559.146	.	48657.9	27.6845	26.4335	10
chr11	66277151	66277261	chr11.66277151	554.632	.	48265.2	36.8697	35.0316	24
chr7	44115879	44115921	chr7.44115879	551.191	.	47965.7	23.924	23.0951	12
chrX	153870820	153870867	chrX.153870820	550.931	.	47943.1	26.91	25.7963	17
chrX	47228746	47228828	chrX.47228746	548.14	.	47700.2	27.6845	26.4335	65
chr14	22846818	22846896	chr14.22846818	545.751	.	47492.3	26.3705	25.2826	33
chr6	26124249	26124307	chr6.26124249	541.492	.	47121.8	19.7899	19.2491	42
chr12	118246290	118246386	chr12.118246290	538.504	.	46861.8	32.2795	30.6815	8
chr12	6536726	6536801	chr12.6536726	537.477	.	46772.3	25.3846	24.4178	31
chr3	47870919	47870991	chr3.47870919	536.586	.	46694.9	24.3983	23.5217	70
chrX	154019287	154019325	chrX.154019287	536.112	.	46653.6	21.5374	20.899	33
chr7	5527519	5527557	chr7.5527519	534.682	.	46529.2	21.5374	20.899	6
chr3	9702099	9702197	chr3.9702099	532.822	.	46367.3	32.9355	31.3088	61
chr1	16393299	16393379	chr1.16393299	531.219	.	46227.8	27.0275	25.8665	54
chr5	177491026	177491104	chr5b.93491026	529.396	.	46069.2	26.3705	25.2826	35
chr9	131485004	131485078	chr9.131485004	527.819	.	45931.9	25.0559	24.1369	58
chr7	44116140	44116212	chr7.44116140	526.28	.	45798	24.3983	23.5217	32
chr2	96253706	96253823	chr2b.2253706	524.881	.	45676.3	39.1633	37.2335	39
chr4	48831159	48831209	chr4.48831159	523.584	.	45563.5	17.1508	16.8005	29
chr11	66004006	66004066	chr11.66004006	521.828	.	45410.7	20.449	19.8681	23
chr3	129315251	129315360	chr3b.38315251	517.484	.	45032.6	36.5419	34.7338	14
chr7	76304163	76304210	chr7.76304163	517.05	.	44994.9	26.91	25.7963	25
chr11	65505541	65505577	chr11.65505541	514.185	.	44745.5	20.3449	19.7906	32
chr4	2250454	2250495	chr4.2250454	512.112	.	44565.2	23.3271	22.556	26
chr3	160514942	160514999	chr3b.69514942	511.013	.	44469.6	19.4603	18.9551	16
chr6	113860349	113860429	chr6b.28860349	506.549	.	44081.1	27.0275	25.8665	0
chr12	6537640	6537700	chr12.6537640	500.13	.	43522.6	20.449	19.8681	31
chr11	65921371	65921450	chr11.65921371	499.819	.	43495.5	26.6991	25.5962	12
chr16	2767746	2767881	chr16.2767746	498.696	.	43397.7	45.0578	42.8752	90
chr1	153607417	153607492	chr1b.28607417	498.104	.	43346.3	25.3846	24.4178	0
chr5	73446746	73446844	chr5.73446746	496.998	.	43250	32.9355	31.3088	60
chr2	233275862	233275946	chr2b.139275862	494.18	.	43004.8	28.3412	26.9698	80
chr3	184317737	184317782	chr3b.93317737	492.37	.	42847.3	25.7153	24.7338	34
chr1	46035469	46035586	chr1.46035469	491.4	.	42762.9	39.1633	37.2335	26
chrX	78104281	78104316	chrX.78104281	490.752	.	42706.5	19.7489	19.2358	14
chr5	147391413	147391500	chr5b.63391413	490.716	.	42703.4	29.3262	27.8915	74
chr3	184170066	184170172	chr3b.93170066	490.602	.	42693.4	35.5586	33.802	35
chr13	79368806	79368900	chr13.79368806	487.961	.	42463.6	31.6234	30.0669	54
chr7	5528130	5528173	chr7.5528130	487.905	.	42458.8	24.521	23.6379	42
chrX	153948788	153948832	chrX.153948788	483.961	.	42115.5	25.1181	24.192	19
chr1	149926432	149926488	chr1b.24926432	483.533	.	42078.3	19.1306	18.6581	1
chr5	173609259	173609345	chr5b.89609259	482.929	.	42025.8	28.9979	27.5832	25
chr22	29695739	29695869	chr22.29695739	479.97	.	41768.3	43.4209	41.3149	35
chrX	154359302	154359380	chrX.154359302	479.216	.	41702.6	26.3705	25.2826	73
chr9	134164447	134164491	chr9.134164447	476.69	.	41482.8	25.1181	24.192	43
chr2	206004453	206004563	chr2b.112004453	474.42	.	41285.3	36.8697	35.0316	38
chr15	41899929	41900015	chr15.41899929	474.114	.	41258.7	28.9979	27.5832	27
chr6	36231101	36231145	chr6.36231101	470.619	.	40954.6	25.1181	24.192	13
chr12	52170361	52170494	chr12.52170361	464.324	.	40406.8	44.4031	42.2355	43
chr8	47961159	47961205	chr8.47961159	463.95	.	40374.3	26.3126	25.2761	21
chrX	65741174	65741231	chrX.65741174	463.295	.	40317.2	19.4603	18.9551	37
chr17	81511945	81512004	chr17.81511945	462.337	.	40233.9	20.1195	19.5718	13
chr12	124334507	124334605	chr12.124334507	460.741	.	40095	32.9355	31.3088	44
chr3	4983364	4983500	chr3.4983364	457.307	.	39796.2	45.3852	43.1871	23
chr6	26250448	26250482	chr6.26250448	457.186	.	39785.7	19.1531	18.6739	0
chr3	186080006	186080062	chr3b.95080006	456.875	.	39758.6	19.1306	18.6581	34
chr11	67398434	67398524	chr11.67398434	456.031	.	39685.2	30.3109	28.8226	6
chr3	50355263	50355368	chr3.50355263	454.769	.	39575.3	35.2308	33.4964	45
chr2	28751855	28751940	chr2.28751855	453.502	.	39465.1	28.6696	27.2702	22
chr5	140568197	140568264	chr5b.56568197	453.015	.	39422.7	22.7537	22.0076	26
chr4	17811045	17811108	chr4.17811045	452.384	.	39367.8	21.437	20.8046	18
chr20	43716202	43716295	chr20.43716202	451.398	.	39282	31.2953	29.7668	3
chr21	44851469	44851539	chr21.44851469	451.251	.	39269.2	23.7406	22.9177	57
chr15	59080962	59081035	chr15.59080962	449.069	.	39079.4	24.7271	23.814	30
chr19	49490530	49490614	chr19.49490530	448.582	.	39037	28.3412	26.9698	3
chr14	55063098	55063197	chr14.55063098	446.85	.	38886.3	33.2635	31.606	23
chr5	141573841	141573913	chr5b.57573841	446.599	.	38864.4	24.3983	23.5217	41
chr3	48469417	48469466	chr3.48469417	446.015	.	38813.6	28.1051	26.8228	0
chr11	69648031	69648076	chr11.69648031	445.505	.	38769.2	25.7153	24.7338	14
chr8	144360205	144360303	chr8.144360205	437.684	.	38088.7	32.9355	31.3088	24
chr14	90405694	90405781	chr14.90405694	437.63	.	38084	29.3262	27.8915	15
chr12	6936580	6936658	chr12.6936580	437.31	.	38056.1	26.3705	25.2826	25
chr5	176392599	176392648	chr5b.92392599	434.739	.	37832.3	28.1051	26.8228	10
chr1	167541362	167541431	chr1b.42541362	432.528	.	37640	23.4117	22.5974	43
chr9	98087212	98087299	chr9.98087212	431.793	.	37576	29.3262	27.8915	16
chr1	44221144	44221293	chr1.44221144	430.217	.	37438.8	49.6396	47.2326	61
chr5	154419297	154419375	chr5b.70419297	427.308	.	37185.8	26.3705	25.2826	65
chrX	49174737	49174796	chrX.49174737	424.932	.	36979	20.1195	19.5718	37
chr8	100721772	100721833	chr8.100721772	422.227	.	36743.6	20.7784	20.1915	58
chr16	28835617	28835715	chr16.28835617	420.52	.	36595.1	32.9355	31.3088	36
chr17	42404549	42404671	chr17.42404549	419.701	.	36523.8	40.8012	38.787	95
chr1	8861228	8861304	chr1.8861228	418.941	.	36457.7	25.7132	24.7338	45
chr6	36968488	36968564	chr6.36968488	418.352	.	36406.4	25.7132	24.7338	10
chrX	153861943	153862055	chrX.153861943	415.513	.	36159.4	37.5251	35.6622	41
chr2	173363861	173363901	chr2b.79363861	413.647	.	35997	22.7304	22.0076	10
chr3	47590694	47590741	chr3.47590694	412.667	.	35911.7	26.91	25.7963	43
chr22	39313261	39313332	chr22.39313261	412.509	.	35898	24.0695	23.1988	34
chr2	113957993	113958041	chr2b.19957993	411.442	.	35805.1	27.5075	26.3196	13
chr4	10075226	10075267	chr4.10075226	410.855	.	35754.1	23.3271	22.556	13
chrX	154366065	154366105	chrX.154366065	410.424	.	35716.5	22.7304	22.0076	12
chr15	84797963	84798064	chr15.84797963	407.981	.	35504	33.9193	32.2385	59
chrX	154365402	154365441	chrX.154365402	407.967	.	35502.8	22.1338	21.453	22
chr11	62888700	62888745	chr11.62888700	407.224	.	35438.1	25.7153	24.7338	11
chr15	64137606	64137699	chr15.64137606	407.206	.	35436.6	31.2953	29.7668	22
chr6	139373494	139373552	chr6b.54373494	406.723	.	35394.5	19.7899	19.2491	29
chr9	131496100	131496193	chr9.131496100	406.177	.	35347	31.2953	29.7668	59
chr8	38347727	38347761	chr8.38347727	405.157	.	35258.2	19.1531	18.6739	31
chr12	6866005	6866080	chr12.6866005	404.389	.	35191.4	25.3846	24.4178	40
chr15	41480844	41480938	chr15.41480844	401.974	.	34981.3	31.6234	30.0669	38
chr7	99458261	99458292	chr7.99458261	401.449	.	34935.6	17.3668	17.0077	6
chr15	77052793	77052836	chr15.77052793	398.839	.	34708.4	24.521	23.6379	25
chr2	9630361	9630443	chr2.9630361	395.493	.	34417.3	27.6845	26.4335	71
chr7	5312632	5312769	chr7.5312632	392.847	.	34187.1	45.7125	43.4642	52
chr17	38919561	38919644	chr17.38919561	391.745	.	34091.1	28.0129	26.739	0
chr13	109784189	109784233	chr13.109784189	390.649	.	33995.8	25.1181	24.192	2
chr5	73446987	73447060	chr5.73446987	389.944	.	33934.4	24.7271	23.814	35
chr2	74493093	74493194	chr2.74493093	387.786	.	33746.6	33.9193	32.2385	36
chr8	144516673	144516742	chr8.144516673	386.637	.	33646.7	23.4118	22.5974	45
chr12	120701737	120701806	chr12.120701737	385.008	.	33504.9	23.4117	22.5974	15
chr11	75404743	75404784	chr11.75404743	380.558	.	33117.7	23.3271	22.556	39
chr1	26731254	26731318	chr1.26731254	379.329	.	33010.8	21.7663	21.0971	9
chr8	142735453	142735535	chr8.142735453	375.95	.	32716.7	27.6845	26.4335	63
chr22	35424274	35424381	chr22.35424274	375.388	.	32667.8	35.8864	34.1211	58
chr12	6537344	6537415	chr12.6537344	375.064	.	32639.6	24.0695	23.1988	38
chr15	88899330	88899413	chr15.88899330	374.021	.	32548.9	28.0129	26.739	67
chrX	130081439	130081479	chrX.130081439	373.55	.	32507.8	22.7304	22.0076	19
chr11	65920624	65920663	chr11.65920624	373.528	.	32506	22.1338	21.453	36
chr1	156250028	156250139	chr1b.31250028	372.291	.	32398.3	37.1974	35.3453	51
chr3	128912583	128912621	chr3b.37912583	372.204	.	32390.7	21.5374	20.899	31
chr19	46610241	46610369	chr19.46610241	371.913	.	32365.4	42.7661	40.6664	62
chr3	51420125	51420207	chr3.51420125	371.786	.	32354.3	27.6845	26.4335	31
chr3	132660382	132660485	chr3b.41660382	371.477	.	32327.5	34.5751	32.8645	45
chr1	156935691	156935760	chr1b.31935691	370.69	.	32259	23.4117	22.5974	15
chr12	55726947	55726980	chr12.55726947	370.223	.	32218.4	18.5575	18.1145	9
chr3	185824859	185824900	chr3b.94824859	369.812	.	32182.6	23.3271	22.556	38
chr1	27409922	27410082	chr1.27409922	368.191	.	32041.6	53.2382	50.7768	33
chr3	184170433	184170544	chr3b.93170433	367.985	.	32023.6	37.1974	35.3453	89
chr10	96949149	96949178	chr10.96949149	367.816	.	32008.9	16.1771	15.8883	14
chr16	1962561	1962636	chr16.1962561	365.417	.	31800.1	25.3846	24.4178	32
chr2	105280603	105280638	chr2b.11280603	365.229	.	31783.8	19.7489	19.2358	23
chr5	41918684	41918761	chr5.41918684	362.599	.	31555	26.0419	25.0162	25
chrX	119574647	119574733	chrX.119574647	362.546	.	31550.3	28.9979	27.5832	80
chr12	56272227	56272275	chr12.56272227	361.812	.	31486.4	27.5075	26.3196	1
chr17	50090285	50090405	chr17.50090285	358.552	.	31202.8	40.1461	38.1618	59
chr20	34280928	34281001	chr20.34280928	357.644	.	31123.8	24.7271	23.814	47
chr15	75675043	75675118	chr15.75675043	357.53	.	31113.8	25.3846	24.4178	13
chr2	64636455	64636524	chr2.64636455	356.648	.	31037.1	23.4117	22.5974	2
chr17	81510712	81510796	chr17.81510712	356.442	.	31019.1	28.3412	26.9698	83
chr6	44255168	44255237	chr6.44255168	354.574	.	30856.6	23.4117	22.5974	27
chr17	44076087	44076218	chr17.44076087	354.117	.	30816.9	43.7483	41.6092	57
chr8	47961563	47961608	chr8.47961563	353.792	.	30788.6	25.7153	24.7338	36
chr9	93529483	93529539	chr9.93529483	352.114	.	30642.6	19.1307	18.6581	5
chr15	51909588	51909663	chr15.51909588	351.745	.	30610.5	25.3846	24.4178	0
chr6	52500929	52500975	chr6.52500929	351.06	.	30550.8	15.8292	15.5448	36
chr3	52524420	52524497	chr3.52524420	349.181	.	30387.3	26.0419	25.0162	44
chr12	6538207	6538271	chr12.6538207	346.054	.	30115.2	21.7663	21.0971	1
chr12	111516213	111516312	chr12.111516213	345.618	.	30077.3	33.2635	31.606	22
chr11	102205942	102205972	chr11.102205942	344.824	.	30008.2	16.7718	16.4537	6
chr11	62533329	62533377	chr11.62533329	344.083	.	29943.7	27.5075	26.3196	41
chr7	98281889	98281963	chr7.98281889	343.147	.	29862.2	25.0559	24.1369	37
chr1	214384124	214384214	chr1b.89384124	343.146	.	29862.1	30.3109	28.8226	27
chr20	63522018	63522085	chr20.63522018	343.116	.	29859.6	22.7537	22.0076	40
chr15	96334412	96334458	chr15.96334412	342.998	.	29849.3	26.3126	25.2761	11
chr14	104770359	104770406	chr14.104770359	342.893	.	29840.1	26.91	25.7963	26
chr16	25178061	25178146	chr16.25178061	342.376	.	29795.2	28.6696	27.2702	54
chr12	6942111	6942206	chr12.6942111	342.22	.	29781.6	31.9515	30.3785	36
chr10	8058671	8058738	chr10.8058671	341.789	.	29744.1	22.7537	22.0076	26
chr11	57699969	57700086	chr11.57699969	341.321	.	29703.4	39.1633	37.2335	97
chr8	143925691	143925786	chr8.143925691	339.847	.	29575.1	31.9514	30.3785	90
chr2	96602180	96602225	chr2b.2602180	337.639	.	29383	25.7153	24.7338	43
chr11	65127991	65128118	chr11.65127991	335.069	.	29159.3	42.4386	40.3514	63
chr2	68252346	68252424	chr2.68252346	333.903	.	29057.9	26.3705	25.2826	35
chr8	143932528	143932571	chr8.143932528	332.475	.	28933.6	24.521	23.6379	9
chr3	128650671	128650718	chr3b.37650671	331.352	.	28835.9	26.91	25.7963	44
chr1	205791253	205791310	chr1b.80791253	331.149	.	28818.3	19.4605	18.9551	15
chr6	73517791	73517830	chr6.73517791	330.741	.	28782.8	22.1338	21.453	27
chr6	160048419	160048448	chr6b.75048419	329.643	.	28687.2	16.1771	15.8883	6
chr2	121530940	121531000	chr2b.27530940	329.45	.	28670.4	20.449	19.8681	0
chr8	123014987	123015084	chr8.123014987	328.88	.	28620.8	32.6075	30.9974	52
chr3	119825071	119825102	chr3b.28825071	328.292	.	28569.7	17.3668	17.0077	17
chr22	37805520	37805584	chr22.37805520	325.417	.	28319.5	21.7663	21.0971	37
chr15	74836699	74836757	chr15.74836699	324.951	.	28278.9	19.7899	19.2491	16
chr9	137448630	137448753	chr9.137448630	324.845	.	28269.7	41.1287	39.0878	122
chr20	31665869	31665961	chr20.31665869	324.479	.	28237.8	30.9672	29.4536	37
chr2	215397765	215397803	chr2b.121397765	323.921	.	28189.3	21.5374	20.899	4
chr12	98594032	98594090	chr12.98594032	321.016	.	27936.5	19.7899	19.2491	51
chr19	49490265	49490343	chr19.49490265	320.636	.	27903.4	26.3705	25.2826	32
chr16	87832781	87832883	chr16.87832781	319.415	.	27797.2	34.2472	32.5567	40
chrX	53588400	53588471	chrX.53588400	318.452	.	27713.4	24.0695	23.1988	24
chr1	154959473	154959595	chr1b.29959473	318.222	.	27693.4	40.8012	38.787	107
chr3	58123204	58123248	chr3.58123204	318.131	.	27685.4	25.1181	24.192	0
chr2	215372150	215372189	chr2b.121372150	317.03	.	27589.6	22.1338	21.453	9
chr10	1000712	1000804	chr10.1000712	315.075	.	27419.5	30.9672	29.4536	17
chr1	51919835	51919910	chr1.51919835	314.332	.	27354.8	25.3846	24.4178	9
chr20	63933559	63933661	chr20.63933559	313.075	.	27245.5	34.2472	32.5567	66
chr16	56608637	56608676	chr16.56608637	311.669	.	27123.1	22.1338	21.453	26
chr3	47410826	47410925	chr3.47410826	311.511	.	27109.4	33.2635	31.606	12
chr12	49128462	49128526	chr12.49128462	309.821	.	26962.4	21.7663	21.0971	5
chr15	75412809	75412853	chr15.75412809	309.141	.	26903.2	25.1181	24.192	15
chr14	50944214	50944258	chr14.50944214	307.876	.	26793	25.1181	24.192	18
chr3	184176948	184177036	chr3b.93176948	307.537	.	26763.6	29.6544	28.1945	57
chr6	26156581	26156622	chr6.26156581	306.364	.	26661.5	23.3271	22.556	39
chr6	41599368	41599484	chr6.41599368	306.275	.	26653.7	38.8357	36.9143	102
chr3	57559878	57559973	chr3.57559878	305.516	.	26587.7	31.9514	30.3785	47
chr7	137876899	137877012	chr7.137876899	305.133	.	26554.4	37.8528	35.9712	45
chr2	27041408	27041485	chr2.27041408	304.14	.	26468	26.0419	25.0162	33
chr2	203439671	203439756	chr2b.109439671	304.109	.	26465.3	28.6696	27.2702	50
chr19	3976453	3976533	chr19.3976453	304.09	.	26463.7	27.0275	25.8665	13
chr1	158094901	158095008	chr1b.33094901	303.025	.	26370.9	35.8864	34.1211	51
chr15	96331956	96331989	chr15.96331956	302.853	.	26356	18.5575	18.1145	4
chr16	89561658	89561730	chr16.89561658	302.699	.	26342.6	24.3983	23.5217	22
chrX	154349681	154349749	chrX.154349681	301.338	.	26224.2	23.0827	22.3174	67
chr14	105394644	105394690	chr14.105394644	300.189	.	26124.2	26.3126	25.2761	16
chr4	17802836	17802871	chr4.17802836	299.93	.	26101.7	19.7489	19.2358	31
chrX	49030083	49030114	chrX.49030083	299.921	.	26100.8	17.3668	17.0077	11
chr3	49533098	49533178	chr3.49533098	299.556	.	26069.1	27.0275	25.8665	22
chr15	64678168	64678217	chr15.64678168	299.29	.	26046	28.1051	26.8228	12
chr7	137908268	137908348	chr7.137908268	298.903	.	26012.3	27.0275	25.8665	32
chr6	89081086	89081126	chr6b.4081086	298.88	.	26010.2	22.7304	22.0076	15
chr11	65854971	65855056	chr11.65854971	298.528	.	25979.6	28.6696	27.2702	27
chr11	119094915	119094981	chr11.119094915	298.415	.	25969.8	22.4246	21.7075	8
chr8	143923409	143923454	chr8.143923409	298.414	.	25969.7	25.7153	24.7338	25
chr2	9584549	9584611	chr2.9584549	297.37	.	25878.9	21.1077	20.4836	57
chr14	22846143	22846241	chr14.22846143	297.253	.	25868.7	32.9355	31.3088	40
chrX	154365159	154365222	chrX.154365159	296.547	.	25807.3	21.437	20.8046	60
chr19	1440374	1440449	chr19.1440374	296.546	.	25807.1	25.3846	24.4178	36
chr2	1648540	1648602	chr2.1648540	296.44	.	25797.9	21.1077	20.4836	19
chr14	102933403	102933445	chr14.102933403	296.415	.	25795.7	23.924	23.0951	29
chr15	72202510	72202551	chr15.72202510	295.366	.	25704.5	14.1746	13.9626	19
chr8	22615742	22615785	chr8.22615742	294.596	.	25637.5	24.521	23.6379	29
chrX	154348849	154348863	chrX.154348849	293.641	.	25554.4	7.30229	7.23294	1
chr2	86481964	86482004	chr2.86481964	293.525	.	25544.3	22.7304	22.0076	18
chr22	29278089	29278132	chr22.29278089	293.454	.	25538.1	24.521	23.6379	29
chr12	69258816	69258869	chr12.69258816	293.307	.	25525.4	18.1411	17.7133	49
chr14	68882902	68882965	chr14.68882902	293.185	.	25514.7	21.437	20.8046	46
chr6	133889711	133889742	chr6b.48889711	292.429	.	25448.9	17.3668	17.0077	21
chr21	37197930	37197963	chr21.37197930	292.112	.	25421.3	18.5575	18.1145	6
chr11	65430229	65430305	chr11.65430229	290.713	.	25299.6	25.7132	24.7338	19
chr7	137879255	137879371	chr7.137879255	290.698	.	25298.3	38.8357	36.9143	53
chr20	45420378	45420426	chr20.45420378	290.669	.	25295.8	27.5075	26.3196	32
chr6	34242751	34242792	chr6.34242751	290.617	.	25291.2	23.3271	22.556	21
chr14	74764147	74764225	chr14.74764147	289.982	.	25236	26.3705	25.2826	46
chr11	72007284	72007351	chr11.72007284	289.794	.	25219.6	22.7537	22.0076	38
chr10	102644551	102644638	chr10.102644551	289.417	.	25186.8	29.3262	27.8915	51
chr11	58618298	58618335	chr11.58618298	288.846	.	25137.1	20.941	20.3472	36
chr3	47875773	47875837	chr3.47875773	288.599	.	25115.6	21.7663	21.0971	45
chr5	32229031	32229081	chr5.32229031	287.507	.	25020.7	17.1508	16.8005	49
chr20	62308132	62308167	chr20.62308132	286.629	.	24944.2	19.7489	19.2358	6
chr9	127523773	127523819	chr9.127523773	286.613	.	24942.9	26.3126	25.2761	2
chrX	12976277	12976321	chrX.12976277	285.465	.	24842.9	25.1181	24.192	20
chr3	9448540	9448628	chr3.9448540	284.66	.	24772.9	29.6544	28.1945	9
chr12	119686988	119687029	chr12.119686988	282.505	.	24585.4	23.3271	22.556	29
chr15	39582237	39582292	chr15.39582237	281.906	.	24533.3	18.8009	18.3337	22
chr17	82085733	82085874	chr17.82085733	281.662	.	24512	47.0217	44.7065	48
chr1	150512421	150512451	chr1b.25512421	281.662	.	24512	16.7718	16.4537	9
chr12	110349899	110350002	chr12.110349899	281.413	.	24490.3	34.5751	32.8645	46
chr19	38729417	38729525	chr19.38729417	281.38	.	24487.5	36.2142	34.428	49
chr7	75985137	75985230	chr7.75985137	280.786	.	24435.7	31.2953	29.7668	41
chr8	144140229	144140291	chr8.144140229	280.491	.	24410.1	21.1077	20.4836	0
chr20	31514518	31514612	chr20.31514518	280.141	.	24379.6	31.6234	30.0669	62
chrX	53433751	53433827	chrX.53433751	279.682	.	24339.7	25.7132	24.7338	59
chr1	228494124	228494187	chr1b.103494124	278.985	.	24279.1	21.437	20.8046	27
chr22	36348931	36349012	chr22.36348931	278.22	.	24212.5	27.356	26.1802	40
chrX	56729401	56729485	chrX.56729401	277.996	.	24193	28.3412	26.9698	60
chr20	44068871	44068971	chr20.44068871	276.779	.	24087.1	33.5914	31.9248	47
chr22	42619411	42619531	chr22.42619411	275.314	.	23959.6	40.1461	38.1618	65
chr2	20202626	20202734	chr2.20202626	275.148	.	23945.2	36.2142	34.428	40
chr5	141511492	141511568	chr5b.57511492	275.076	.	23938.9	25.7132	24.7338	37
chr6	89080904	89080950	chr6b.4080904	274.946	.	23927.6	26.3126	25.2761	35
chr5	73498469	73498508	chr5.73498469	274.111	.	23854.9	22.1338	21.453	29
chr12	56229219	56229263	chr12.56229219	273.65	.	23814.8	25.1181	24.192	2
chrX	153956243	153956291	chrX.153956243	273.607	.	23811	27.5075	26.3196	14
chr2	174571844	174571913	chr2b.80571844	272.761	.	23737.5	23.4117	22.5974	50
chr6	131950665	131950714	chr6b.46950665	272.62	.	23725.2	28.1051	26.8228	27
chr15	96330715	96330752	chr15.96330715	271.796	.	23653.5	20.941	20.3472	35
chr12	55966821	55966915	chr12.55966821	271.633	.	23639.3	31.6234	30.0669	32
chrX	57596591	57596665	chrX.57596591	271.551	.	23632.2	25.0721	24.1465	25
chr1	149926005	149926051	chr1b.24926005	271.159	.	23598.1	26.3126	25.2761	30
chr1	156136974	156137042	chr1b.31136974	270.395	.	23531.6	23.0827	22.3174	19
chr1	42926662	42926764	chr1.42926662	269.44	.	23448.4	34.2472	32.5567	17
chr12	6752966	6753045	chr12.6752966	269.325	.	23438.5	26.6991	25.5962	75
chr11	65428709	65428776	chr11.65428709	269.097	.	23418.6	22.7537	22.0076	52
chr5	10258299	10258353	chr5.10258299	269.054	.	23414.9	18.471	18.0359	3
chr22	42619760	42619841	chr22.42619760	267.883	.	23313	27.356	26.1802	55
chrX	49038266	49038308	chrX.49038266	267.753	.	23301.7	23.924	23.0951	0
chr11	64767244	64767284	chr11.64767244	267.674	.	23294.8	22.7304	22.0076	5
chr22	30340728	30340769	chr22.30340728	266.874	.	23225.1	23.3271	22.556	19
chr10	97715191	97715235	chr10.97715191	266.266	.	23172.2	25.1181	24.192	24
chr12	53454766	53454833	chr12.53454766	265.1	.	23070.8	22.7537	22.0076	15
chr16	2255626	2255701	chr16.2255626	264.57	.	23024.7	25.3846	24.4178	20
chr14	99514507	99514608	chr14.99514507	263.331	.	22916.9	33.9194	32.2385	68
chrX	49029841	49029916	chrX.49029841	263.224	.	22907.6	25.3846	24.4178	54
chr5	173608264	173608340	chr5b.89608264	262.919	.	22881	25.7132	24.7338	26
chr2	96251029	96251078	chr2b.2251029	262.364	.	22832.8	28.1051	26.8228	43
chr2	235042653	235042722	chr2b.141042653	262.268	.	22824.4	23.4117	22.5974	29
chr3	184316213	184316245	chr3b.93316213	262.118	.	22811.4	17.962	17.5628	2
chrX	153955529	153955566	chrX.153955529	262.078	.	22807.9	20.941	20.3472	5
chr8	144436655	144436777	chr8.144436655	261.636	.	22769.4	40.8012	38.787	14
chr20	36779468	36779572	chr20.36779468	260.931	.	22708	34.9029	33.1793	58
chr10	101579198	101579233	chr10.101579198	260.499	.	22670.4	19.7489	19.2358	21
chr3	100748198	100748273	chr3b.9748198	260.165	.	22641.4	25.3846	24.4178	26
chr5	917161	917225	chr5.917161	258.952	.	22535.9	21.7663	21.0971	39
chr1	183552859	183552916	chr1b.58552859	258.717	.	22515.4	19.4604	18.9551	20
chr5	181235470	181235555	chr5b.97235470	258.533	.	22499.4	28.6696	27.2702	41
chr15	90638516	90638587	chr15.90638516	256.648	.	22335.4	24.0695	23.1988	6
chr16	2976865	2976949	chr16.2976865	255.84	.	22265	28.3412	26.9698	81
chr22	41435501	41435637	chr22.41435501	255.52	.	22237.2	45.3852	43.1871	50
chr22	17592210	17592330	chr22.17592210	255.046	.	22196	40.1461	38.1618	67
chr11	35231042	35231092	chr11.35231042	254.757	.	22170.8	17.1508	16.8005	21
chr15	90882316	90882404	chr15.90882316	254.631	.	22159.9	29.6544	28.1945	60
chr4	10099034	10099071	chr4.10099034	254.593	.	22156.5	20.941	20.3472	8
chr6	36489538	36489605	chr6.36489538	253.72	.	22080.6	22.7537	22.0076	28
chr1	36286978	36287014	chr1.36286978	253.56	.	22066.7	20.3449	19.7906	17
chr17	81867834	81867906	chr17.81867834	253.514	.	22062.6	24.3983	23.5217	58
chr11	74013126	74013350	chr11.74013126	253.112	.	22027.7	74.1581	71.1227	173
chr14	74902998	74903060	chr14.74902998	252.108	.	21940.3	21.1077	20.4836	47
chr8	144514213	144514244	chr8.144514213	251.87	.	21919.6	17.3668	17.0077	20
chr12	6510470	6510511	chr12.6510470	251.678	.	21902.8	23.3271	22.556	16
chr13	29514154	29514198	chr13.29514154	251.558	.	21892.4	25.1181	24.192	25
chr5	115625905	115625958	chr5b.31625905	251.409	.	21879.4	18.1411	17.7133	37
chr11	61795623	61795663	chr11.61795623	251.159	.	21857.7	22.7304	22.0076	10
chr9	133362420	133362467	chr9.133362420	250.847	.	21830.6	26.91	25.7963	46
chr3	134370816	134370877	chr3b.43370816	250.36	.	21788.2	20.7784	20.1915	59
chr15	96330879	96330921	chr15.96330879	250.321	.	21784.8	23.924	23.0951	23
chr7	75422270	75422351	chr7.75422270	250.138	.	21768.9	27.356	26.1802	67
chr2	87521251	87521292	chr2.87521251	249.591	.	21721.3	23.3271	22.556	15
chr2	127526297	127526348	chr2b.33526297	249.422	.	21706.6	17.481	17.098	24
chr4	2248305	2248369	chr4.2248305	249.314	.	21697.1	21.7663	21.0971	9
chr8	144435030	144435109	chr8.144435030	249.076	.	21676.4	26.699	25.5962	31
chr19	50798487	50798587	chr19.50798487	247.879	.	21572.3	33.5914	31.9248	39
chr11	35139223	35139283	chr11.35139223	247.668	.	21553.9	20.449	19.8681	28
chr2	85539245	85539275	chr2.85539245	247.013	.	21497	16.7718	16.4537	0
chr5	32125466	32125502	chr5.32125466	246.99	.	21494.9	20.3449	19.7906	1
chr12	56348973	56349042	chr12.56348973	246.989	.	21494.9	23.4117	22.5974	53
chr16	3850603	3850689	chr16.3850603	246.47	.	21449.7	28.9979	27.5832	58
chr1	156114946	156114990	chr1b.31114946	246.411	.	21444.6	25.1181	24.192	11
chr3	47852340	47852401	chr3.47852340	246.387	.	21442.4	20.7784	20.1915	36
chr14	24149426	24149520	chr14.24149426	246.277	.	21432.9	31.6234	30.0669	33
chr8	22574828	22574887	chr8.22574828	246.264	.	21431.8	20.1195	19.5718	35
chr3	51993652	51993694	chr3.51993652	246.156	.	21422.4	23.924	23.0951	23
chrX	154367689	154367724	chrX.154367689	245.888	.	21399	19.7489	19.2358	8
chr15	48645597	48645663	chr15.48645597	245.799	.	21391.3	22.4246	21.7075	32
chr8	127922657	127922719	chr8.127922657	245.356	.	21352.7	21.4612	20.8232	54
chrX	153952902	153952987	chrX.153952902	245.355	.	21352.7	28.6696	27.2702	35
chr2	240578102	240578173	chr2b.146578102	245.129	.	21333	24.0695	23.1988	35
chr2	240466334	240466441	chr2b.146466334	244.976	.	21319.7	35.8864	34.1211	65
chr14	68792893	68792977	chr14.68792893	244.333	.	21263.7	28.3412	26.9698	39
chr12	6870405	6870459	chr12.6870405	243.957	.	21231	18.471	18.0359	10
chr12	52191879	52191991	chr12.52191879	242.974	.	21145.5	37.5251	35.6622	60
chrX	10130025	10130093	chrX.10130025	242.634	.	21115.9	23.0827	22.3174	32
chr5	138467887	138467943	chr5b.54467887	242.567	.	21110.1	19.1306	18.6581	3
chr8	22574701	22574736	chr8.22574701	242.479	.	21102.4	19.7489	19.2358	14
chr17	49404933	49405022	chr17.49404933	242.208	.	21078.8	29.9827	28.5066	11
chr2	84906087	84906127	chr2.84906087	241.956	.	21056.9	22.7304	22.0076	8
chr14	102050110	102050146	chr14.102050110	241.939	.	21055.4	20.3449	19.7906	17
chr9	131495873	131495919	chr9.131495873	241.69	.	21033.7	26.3126	25.2761	21
chr14	65062079	65062167	chr14.65062079	241.206	.	20991.6	29.6544	28.1945	84
chr4	7760926	7760982	chr4.7760926	240.741	.	20951.2	19.1306	18.6581	23
chr1	37493948	37494046	chr1.37493948	240.736	.	20950.7	32.9355	31.3088	32
chr7	135977125	135977222	chr7.135977125	240.584	.	20937.5	32.6075	30.9974	96
chr4	7054709	7054767	chr4.7054709	240.377	.	20919.5	19.7899	19.2491	0
chr3	47846194	47846237	chr3.47846194	240.162	.	20900.7	24.521	23.6379	21
chr8	22574971	22575046	chr8.22574971	239.73	.	20863.2	25.3846	24.4178	53
chr1	155326750	155326832	chr1b.30326750	239.526	.	20845.4	27.6845	26.4335	8
chrX	153959818	153959863	chrX.153959818	238.765	.	20779.2	25.7153	24.7338	37
chr6	130890333	130890382	chr6b.45890333	238.761	.	20778.8	28.1051	26.8228	26
chr2	184938596	184938671	chr2b.90938596	238.729	.	20776.1	25.3847	24.4178	39
chr8	41309391	41309431	chr8.41309391	238.509	.	20756.9	22.7304	22.0076	30
chr21	44312134	44312200	chr21.44312134	238.259	.	20735.2	22.4246	21.7075	24
chr22	38220185	38220229	chr22.38220185	237.859	.	20700.4	25.1181	24.192	10
chr20	49246418	49246511	chr20.49246418	237.681	.	20684.9	31.2953	29.7668	20
chr12	6536970	6537006	chr12.6536970	237.495	.	20668.7	20.3449	19.7906	7
chrX	153954228	153954303	chrX.153954228	237.238	.	20646.3	25.3846	24.4178	30
chr11	65526811	65526920	chr11.65526811	237.119	.	20635.9	36.5419	34.7338	49
chr10	102643768	102643814	chr10.102643768	236.743	.	20603.3	26.3126	25.2761	28
chr20	32165912	32166002	chr20.32165912	236.45	.	20577.8	30.3109	28.8226	3
chr1	149923874	149923939	chr1b.24923874	236.182	.	20554.5	22.0955	21.4202	19
chr10	59792904	59792946	chr10.59792904	235.948	.	20534.1	23.924	23.0951	20
chr11	69654069	69654151	chr11.69654069	235.626	.	20506	27.6845	26.4335	51
chr2	27409387	27409438	chr2.27409387	235.283	.	20476.2	17.481	17.098	20
chr6	108260782	108260822	chr6b.23260782	235.088	.	20459.2	22.7304	22.0076	27
chr2	96252876	96252919	chr2b.2252876	234.92	.	20444.7	24.521	23.6379	3
chrX	154359765	154359811	chrX.154359765	234.524	.	20410.1	26.3126	25.2761	29
chr9	33166912	33166957	chr9.33166912	234.195	.	20381.5	25.7153	24.7338	0
chr10	119651463	119651540	chr10.119651463	233.474	.	20318.8	26.0419	25.0162	27
chr7	2729580	2729692	chr7.2729580	233.067	.	20283.4	37.5251	35.6622	67
chr11	62881142	62881192	chr11.62881142	232.974	.	20275.3	17.1508	16.8005	9
chrX	154483807	154483845	chrX.154483807	232.942	.	20272.5	21.5374	20.899	13
chr2	43226259	43226372	chr2.43226259	232.911	.	20269.8	37.8528	35.9712	58
chr8	38413581	38413622	chr8.38413581	232.764	.	20257	23.3271	22.556	11
chr16	30069628	30069701	chr16.30069628	232.229	.	20210.4	24.7271	23.814	40
chr10	101002842	101002873	chr10.101002842	231.932	.	20184.6	17.3668	17.0077	16
chr7	143383055	143383092	chr7.143383055	231.663	.	20161.2	20.941	20.3472	15
chr7	99365881	99365918	chr7.99365881	231.324	.	20131.7	20.941	20.3472	35
chr1	151292331	151292420	chr1b.26292331	230.547	.	20064.1	29.9827	28.5066	47
chr16	28836365	28836446	chr16.28836365	230.337	.	20045.8	27.356	26.1802	0
chr8	66429396	66429431	chr8.66429396	230.203	.	20034.2	19.7489	19.2358	16
chrX	154361986	154362031	chrX.154361986	229.847	.	20003.2	25.7153	24.7338	44
chr4	3416024	3416069	chr4.3416024	229.358	.	19960.7	25.7153	24.7338	14
chr5	10679469	10679497	chr5.10679469	228.995	.	19929	15.5826	15.3205	4
chr8	143917028	143917083	chr8.143917028	228.912	.	19921.9	18.8009	18.3337	27
chr7	1815935	1816021	chr7.1815935	228.498	.	19885.8	28.9979	27.5832	42
chr8	143917663	143917714	chr8.143917663	227.323	.	19783.6	17.481	17.098	43
chr10	72274979	72275024	chr10.72274979	226.138	.	19680.5	25.7153	24.7338	20
chr2	73074344	73074386	chr2.73074344	226.034	.	19671.4	23.924	23.0951	30
chr11	65505199	65505261	chr11.65505199	226.028	.	19670.9	21.1079	20.4836	21
chr1	228494469	228494509	chr1b.103494469	225.988	.	19667.4	22.7304	22.0076	28
chr12	124336908	124337002	chr12.124336908	225.913	.	19660.9	31.6234	30.0669	0
chr9	124358722	124358765	chr9.124358722	225.833	.	19653.9	24.521	23.6379	39
chr13	113860749	113860805	chr13.113860749	225.751	.	19646.8	19.1306	18.6581	30
chrX	154367510	154367532	chrX.154367510	225.587	.	19632.5	12.022	11.8776	1
chr5	40834495	40834534	chr5.40834495	225.464	.	19621.8	22.1338	21.453	35
chr21	43690418	43690452	chr21.43690418	225.433	.	19619.1	19.1531	18.6739	0
chr2	73258938	73258981	chr2.73258938	224.995	.	19581	24.521	23.6379	3
chr7	128652864	128652946	chr7.128652864	224.38	.	19527.5	27.6845	26.4335	67
chr5	149551037	149551063	chr5b.65551037	224.136	.	19506.2	14.3944	14.1796	14
chr8	144791312	144791353	chr8.144791312	224.127	.	19505.5	23.3271	22.556	28
chr2	27055125	27055150	chr2.27055125	223.466	.	19447.9	13.8008	13.6092	19
chr1	54852112	54852154	chr1.54852112	223.409	.	19443	23.924	23.0951	18
chr9	111933786	111933827	chr9.111933786	223.255	.	19429.5	23.3271	22.556	18
chr11	124746630	124746738	chr11.124746630	222.875	.	19396.5	36.2142	34.428	33
chr15	68291345	68291422	chr15.68291345	222.723	.	19383.2	29.6285	28.17	36
chr4	10075370	10075397	chr4.10075370	222.323	.	19348.4	14.9883	14.7519	0
chr8	28347158	28347237	chr8.28347158	222.246	.	19341.8	26.699	25.5962	14
chr12	6384253	6384313	chr12.6384253	221.919	.	19313.3	20.449	19.8681	53
chr1	35192503	35192557	chr1.35192503	221.299	.	19259.3	18.471	18.0359	50
chr1	209632667	209632703	chr1b.84632667	221.247	.	19254.8	20.3449	19.7906	27
chr22	20582869	20582955	chr22.20582869	220.765	.	19212.9	28.9979	27.5832	32
chr12	49040370	49040428	chr12.49040370	220.47	.	19187.2	19.7899	19.2491	29
chr1	158038132	158038225	chr1b.33038132	220.27	.	19169.8	35.6268	33.8644	33
chr22	32859511	32859630	chr22.32859511	220.172	.	19161.3	39.8185	37.8391	66
chr1	21218988	21219054	chr1.21218988	219.274	.	19083.2	22.4246	21.7075	25
chr5	467189	467215	chr5.467189	219.173	.	19074.4	14.3944	14.1796	0
chr8	143916114	143916147	chr8.143916114	218.357	.	19003.4	18.5575	18.1145	8
chr19	18568996	18569086	chr19.18568996	217.224	.	18904.8	30.3109	28.8226	56
chr17	44932108	44932226	chr17.44932108	215.437	.	18749.3	39.4909	37.5347	101
chr5	39376701	39376745	chr5.39376701	215.019	.	18712.9	25.1181	24.192	34
chr2	202036920	202036983	chr2b.108036920	214.935	.	18705.6	21.437	20.8046	14
chr20	44065831	44066014	chr20.44065831	214.649	.	18680.7	60.7592	58.0512	140
chr1	39564738	39564779	chr1.39564738	214.244	.	18645.4	23.3271	22.556	28
chr5	14509130	14509167	chr5.14509130	214.054	.	18629	20.941	20.3472	15
chr13	44989097	44989163	chr13.44989097	213.804	.	18607.1	22.4246	21.7075	50
chr5	173317277	173317307	chr5b.89317277	213.763	.	18603.6	16.7718	16.4537	24
chr20	36779205	36779237	chr20.36779205	213.719	.	18599.7	17.962	17.5628	0
chr15	62762334	62762388	chr15.62762334	213.626	.	18591.6	18.471	18.0359	39
chr1	52687618	52687728	chr1.52687618	213.26	.	18559.8	36.8697	35.0316	19
chr11	46321028	46321068	chr11.46321028	212.609	.	18503.2	22.7304	22.0076	1
chr11	65500672	65500726	chr11.65500672	212.604	.	18502.8	18.471	18.0359	23
chr2	130151902	130151939	chr2b.36151902	212.594	.	18501.9	20.941	20.3472	6
chr10	75398807	75398887	chr10.75398807	212.36	.	18481.5	27.0275	25.8665	39
chrX	154350621	154350754	chrX.154350621	212.255	.	18472.3	44.4031	42.2355	34
chr7	131503629	131503700	chr7.131503629	212.173	.	18465.3	24.0695	23.1988	62
chr6	41598977	41599045	chr6.41598977	212.16	.	18464.1	23.0827	22.3174	11
chrX	153862443	153862485	chrX.153862443	212.132	.	18461.7	23.924	23.0951	0
chr5	78779869	78779918	chr5.78779869	211.771	.	18430.2	28.1051	26.8228	25
chr12	54402056	54402094	chr12.54402056	211.712	.	18425.1	21.5374	20.899	36
chrX	120560544	120560583	chrX.120560544	211.711	.	18425	22.1338	21.453	23
chr14	22767338	22767378	chr14.22767338	211.499	.	18406.6	22.7304	22.0076	10
chr15	75206416	75206455	chr15.75206416	211.068	.	18369.1	22.1338	21.453	34
chr4	20252811	20252850	chr4.20252811	211.024	.	18365.3	22.1338	21.453	0
chr1	201488892	201488931	chr1b.76488892	210.873	.	18352.1	22.1338	21.453	15
chr20	63521331	63521394	chr20.63521331	209.881	.	18265.8	21.437	20.8046	18
chr2	151410066	151410125	chr2b.57410066	209.524	.	18234.7	20.1195	19.5718	16
chr12	56241612	56241729	chr12.56241612	209.446	.	18228	39.1633	37.2335	0
chr10	32056263	32056308	chr10.32056263	209.432	.	18226.8	25.7153	24.7338	14
chr5	140529414	140529474	chr5b.56529414	209.215	.	18207.8	20.449	19.8681	33
chr17	81823000	81823113	chr17.81823000	209.005	.	18189.6	37.8528	35.9712	73
chr10	24607790	24607824	chr10.24607790	208.906	.	18181	11.8519	11.7104	3
chr2	215386764	215386811	chr2b.121386764	208.879	.	18178.6	26.91	25.7963	1
chr15	48644887	48644991	chr15.48644887	208.757	.	18168	34.9048	33.1793	54
chr5	157480305	157480398	chr5b.73480305	207.964	.	18099	31.2953	29.7668	42
chr1	51909220	51909261	chr1.51909220	207.711	.	18076.9	23.3271	22.556	4
chr3	44443021	44443131	chr3.44443021	207.112	.	18024.8	36.8697	35.0316	73
chr2	113240141	113240221	chr2b.19240141	206.399	.	17962.8	27.0275	25.8665	46
chrX	154472913	154472992	chrX.154472913	206.275	.	17952	26.6991	25.5962	28
chr16	3023290	3023340	chr16.3023290	206.217	.	17946.9	17.1508	16.8005	16
chr5	917482	917526	chr5.917482	206.086	.	17935.6	15.1678	14.9101	27
chr2	174562527	174562560	chr2b.80562527	205.441	.	17879.4	18.5575	18.1145	0
chrX	154019458	154019485	chrX.154019458	205.409	.	17876.6	14.9883	14.7519	20
chr3	185935478	185935564	chr3b.94935478	204.984	.	17839.7	28.998	27.5832	41
chr12	47857170	47857211	chr12.47857170	204.216	.	17772.8	23.3271	22.556	10
chr14	21429047	21429084	chr14.21429047	204.019	.	17755.7	20.941	20.3472	21
chr3	9944574	9944617	chr3.9944574	203.968	.	17751.3	24.521	23.6379	12
chr7	2646841	2646902	chr7.2646841	203.957	.	17750.3	20.7784	20.1915	59
chr6	36923560	36923640	chr6.36923560	203.608	.	17719.9	27.0275	25.8665	61
chr10	3781711	3781750	chr10.3781711	203.51	.	17711.4	22.1338	21.453	13
chr11	65505262	65505299	chr11.65505262	202.984	.	17665.6	20.941	20.3472	12
chr3	184335026	184335035	chr3b.93335026	202.599	.	17632.1	4.38578	4.33273	8
chr3	183810547	183810587	chr3b.92810547	201.916	.	17572.7	22.7304	22.0076	36
chr8	140530835	140530922	chr8.140530835	201.648	.	17549.4	29.3262	27.8915	61
chr1	16138140	16138188	chr1.16138140	201.59	.	17544.3	27.5075	26.3196	33
chr3	52405147	52405188	chr3.52405147	201.172	.	17507.9	23.3271	22.556	16
chrX	47649928	47649975	chrX.47649928	200.697	.	17466.6	26.91	25.7963	31
chr8	144316496	144316535	chr8.144316496	200.655	.	17463	22.1338	21.453	4
chr10	71816448	71816482	chr10.71816448	200.526	.	17451.8	19.1531	18.6739	10
chr8	61664613	61664685	chr8.61664613	200.333	.	17434.9	24.3983	23.5217	1
chr21	45264367	45264414	chr21.45264367	200.213	.	17424.5	26.91	25.7963	23
chr5	181242206	181242244	chr5b.97242206	199.942	.	17400.9	21.5374	20.899	23
chrX	154364897	154364930	chrX.154364897	199.834	.	17391.5	18.5575	18.1145	0
chr11	1753052	1753132	chr11.1753052	199.657	.	17376.1	27.0275	25.8665	56
chr17	28720733	28720801	chr17.28720733	199.534	.	17365.4	23.0827	22.3174	67
chr9	128436978	128437066	chr9.128436978	199.377	.	17351.7	29.6544	28.1945	81
chrX	154435272	154435321	chrX.154435272	199.319	.	17346.7	28.1051	26.8228	48
chr6	73519465	73519502	chr6.73519465	199.042	.	17322.6	20.941	20.3472	28
chr8	143921959	143922012	chr8.143921959	198.969	.	17316.2	18.1411	17.7133	17
chr16	3770647	3770744	chr16.3770647	198.584	.	17282.7	32.6075	30.9974	30
chr1	32173947	32174000	chr1.32173947	198.035	.	17235	18.1411	17.7133	15
chr1	30876777	30876901	chr1.30876777	198.034	.	17234.9	41.4562	39.4042	75
chr19	41221883	41221977	chr19.41221883	197.759	.	17210.9	31.6234	30.0669	56
chr6	43179128	43179206	chr6.43179128	197.651	.	17201.6	26.3705	25.2826	30
chr16	88734749	88734818	chr16.88734749	197.53	.	17191.1	23.4117	22.5974	46
chr1	10400441	10400520	chr1.10400441	197.402	.	17179.9	26.6991	25.5962	27
chr9	35076465	35076511	chr9.35076465	197.069	.	17150.9	26.3126	25.2761	13
chrX	153960121	153960152	chrX.153960121	197.059	.	17150.1	17.3668	17.0077	17
chr14	92688718	92688810	chr14.92688718	196.401	.	17092.8	30.9672	29.4536	32
chr3	195867685	195867772	chr3b.104867685	196.372	.	17090.3	29.3262	27.8915	60
chr17	81700774	81700824	chr17.81700774	196.197	.	17075	17.1508	16.8005	38
chr19	15238089	15238198	chr19.15238089	195.613	.	17024.2	36.5419	34.7338	58
chr1	16250919	16251027	chr1.16250919	195.372	.	17003.3	36.2142	34.428	19
chr12	6492915	6492964	chr12.6492915	195.317	.	16998.5	28.1051	26.8228	17
chr3	47610085	47610131	chr3.47610085	195.218	.	16989.9	26.3126	25.2761	44
chr16	2105952	2105996	chr16.2105952	194.755	.	16949.5	25.1181	24.192	43
chr3	128650586	128650620	chr3b.37650586	194.217	.	16902.7	19.1531	18.6739	10
chr3	50258444	50258521	chr3.50258444	194.029	.	16886.4	26.0419	25.0162	63
chr8	29336998	29337057	chr8.29336998	193.364	.	16828.6	20.1195	19.5718	31
chr8	143927279	143927311	chr8.143927279	193.358	.	16828	17.962	17.5628	23
chr17	49828492	49828581	chr17.49828492	193.128	.	16808	29.9827	28.5066	41
chr12	118043198	118043245	chr12.118043198	193.092	.	16804.9	26.91	25.7963	35
chr10	97714791	97714834	chr10.97714791	193.087	.	16804.5	24.521	23.6379	22
chr5	176290200	176290243	chr5b.92290200	192.964	.	16793.7	24.521	23.6379	2
chr6	56463604	56463673	chr6.56463604	192.865	.	16785.1	23.4117	22.5974	7
chr11	102114173	102114266	chr11.102114173	192.751	.	16775.2	31.2953	29.7668	39
chr12	120534514	120534595	chr12.120534514	192.682	.	16769.2	27.356	26.1802	32
chr5	14488007	14488059	chr5.14488007	192.657	.	16767	17.8111	17.4199	1
chr9	128256368	128256429	chr9.128256368	192.395	.	16744.2	20.7785	20.1915	10
chr11	65636254	65636334	chr11.65636254	192.08	.	16716.8	27.0275	25.8665	52
chr1	12011926	12011985	chr1.12011926	191.515	.	16667.7	20.1195	19.5718	47
chr8	143929196	143929227	chr8.143929196	191.474	.	16664	17.3668	17.0077	7
chr14	104770783	104770825	chr14.104770783	191.343	.	16652.7	23.924	23.0951	17
chr2	46297660	46297689	chr2.46297660	191.106	.	16632	16.1771	15.8883	7
chr7	55472865	55472924	chr7.55472865	191.042	.	16626.5	20.1195	19.5718	31
chr5	73447969	73448027	chr5.73447969	190.362	.	16567.3	19.7899	19.2491	6
chr6	142760133	142760201	chr6b.57760133	190.35	.	16566.2	23.0828	22.3174	25
chrX	53569667	53569740	chrX.53569667	190.323	.	16563.9	24.7271	23.814	63
chr8	144314317	144314350	chr8.144314317	190.081	.	16542.8	18.5575	18.1145	14
chr8	143919415	143919458	chr8.143919415	189.954	.	16531.8	24.521	23.6379	1
chr9	136792879	136792971	chr9.136792879	189.662	.	16506.4	30.9672	29.4536	1
chr3	51662476	51662524	chr3.51662476	189.4	.	16483.6	27.5075	26.3196	18
chr12	54280938	54281030	chr12.54280938	188.655	.	16418.7	30.9672	29.4536	13
chr1	167790443	167790500	chr1b.42790443	188.554	.	16410	19.4603	18.9551	24
chr10	17235257	17235284	chr10.17235257	188.379	.	16394.8	14.9883	14.7519	17
chrX	154366831	154366877	chrX.154366831	188.164	.	16376	26.3126	25.2761	16
chr10	102108023	102108079	chr10.102108023	188.046	.	16365.8	19.1306	18.6581	28
chr2	203441313	203441348	chr2b.109441313	187.778	.	16342.5	19.7489	19.2358	10
chrX	153949252	153949347	chrX.153949252	187.544	.	16322.1	31.9514	30.3785	14
chrX	74524632	74524670	chrX.74524632	187.398	.	16309.4	21.5374	20.899	25
chr4	2247934	2247973	chr4.2247934	187.287	.	16299.7	22.1338	21.453	22
chr11	72237546	72237624	chr11.72237546	187.086	.	16282.2	26.3705	25.2826	8
chr9	36353183	36353224	chr9.36353183	187.001	.	16274.9	23.3271	22.556	37
chr3	113746061	113746175	chr3b.22746061	186.86	.	16262.6	36.0486	34.2655	54
chr2	215375660	215375691	chr2b.121375660	186.635	.	16243	17.3668	17.0077	23
chr2	54629503	54629553	chr2.54629503	186.257	.	16210.1	17.1508	16.8005	20
chr21	33555176	33555221	chr21.33555176	185.906	.	16179.6	25.7153	24.7338	37
chr5	176347590	176347677	chr5b.92347590	185.858	.	16175.4	29.3262	27.8915	26
chr7	128858761	128858851	chr7.128858761	185.785	.	16169	30.3109	28.8226	34
chr7	74405427	74405505	chr7.74405427	185.425	.	16137.7	26.3705	25.2826	55
chr16	1962904	1962930	chr16.1962904	185.208	.	16118.8	14.3944	14.1796	3
chr12	115991625	115991668	chr12.115991625	185.059	.	16105.8	24.521	23.6379	24
chr9	122858933	122858978	chr9.122858933	185.049	.	16105	25.7153	24.7338	0
chr2	73079910	73079955	chr2.73079910	184.885	.	16090.7	25.7153	24.7338	31
chr1	153534831	153534869	chr1b.28534831	184.699	.	16074.5	21.5374	20.899	0
chr16	14260938	14261055	chr16.14260938	184.612	.	16067	39.1633	37.2335	87
chr5	73448161	73448205	chr5.73448161	184.49	.	16056.4	25.1181	24.192	10
chr19	48382810	48382922	chr19.48382810	184.419	.	16050.1	37.5251	35.6622	86
chrX	119468485	119468504	chrX.119468485	184.053	.	16018.3	10.2473	10.1422	2
chr6	35426701	35426825	chr6.35426701	183.913	.	16006.1	41.4562	39.4042	53
chr1	152036935	152036970	chr1b.27036935	183.878	.	16003.1	19.7489	19.2358	18
chr5	17275597	17275638	chr5.17275597	183.877	.	16003	23.3271	22.556	37
chr12	53286342	53286428	chr12.53286342	183.48	.	15968.4	28.9979	27.5832	59
chr10	97452228	97452264	chr10.97452228	183.204	.	15944.4	20.3449	19.7906	28
chr1	42682470	42682513	chr1.42682470	182.992	.	15926	24.521	23.6379	41
chr3	129260623	129260741	chr3b.38260623	182.672	.	15898.1	39.4909	37.5347	45
chr6	163572817	163572859	chr6b.78572817	182.245	.	15861	23.924	23.0951	0
chr16	3022851	3022915	chr16.3022851	182.064	.	15845.2	21.7663	21.0971	61
chrX	153875789	153875837	chrX.153875789	182.06	.	15844.9	27.5075	26.3196	27
chr8	130091991	130092020	chr8.130091991	181.822	.	15824.2	16.1771	15.8883	28
chr2	127050827	127050861	chr2b.33050827	181.27	.	15776.2	19.1531	18.6739	3
chr1	28648672	28648707	chr1.28648672	181.179	.	15768.2	19.7489	19.2358	1
chr4	17614688	17614736	chr4.17614688	181.158	.	15766.4	16.4904	16.1739	3
chr14	98973015	98973069	chr14.98973015	180.922	.	15745.9	18.471	18.0359	0
chr1	112701363	112701443	chr1.112701363	180.492	.	15708.4	27.0276	25.8665	28
chr12	2857996	2858036	chr12.2857996	180.105	.	15674.8	22.7304	22.0076	28
chr17	82087745	82087843	chr17.82087745	179.687	.	15638.4	32.9355	31.3088	52
chr12	57821941	57821993	chr12.57821941	179.68	.	15637.8	17.8111	17.4199	26
chr7	123692703	123692743	chr7.123692703	179.277	.	15602.7	22.7304	22.0076	0
chr1	15429657	15429757	chr1.15429657	179.046	.	15582.6	33.5914	31.9248	38
chr7	47303033	47303108	chr7.47303033	178.768	.	15558.4	25.3846	24.4178	40
chr17	81868537	81868631	chr17.81868537	178.703	.	15552.7	31.6234	30.0669	65
chr20	63742885	63742999	chr20.63742885	178.343	.	15521.5	38.1804	36.2754	109
chr5	149247847	149247882	chr5b.65247847	178.296	.	15517.4	19.7489	19.2358	13
chr2	85609540	85609585	chr2.85609540	178.098	.	15500.1	15.4988	15.2379	3
chr1	113973074	113973165	chr1.113973074	177.992	.	15490.9	30.639	29.1383	53
chr9	110061022	110061073	chr9.110061022	177.827	.	15476.6	17.481	17.098	33
chr7	44766220	44766274	chr7.44766220	177.565	.	15453.7	18.4711	18.0359	0
chr2	219540990	219541019	chr2b.125540990	177.471	.	15445.6	16.1771	15.8883	24
chr2	25740212	25740273	chr2.25740212	176.704	.	15378.8	20.7784	20.1915	11
chr12	120211738	120211774	chr12.120211738	176.647	.	15373.9	20.3449	19.7906	10
chrX	154435398	154435447	chrX.154435398	176.51	.	15361.9	28.1051	26.8228	0
chr15	62840709	62840792	chr15.62840709	176.477	.	15359.1	28.0129	26.739	27
chr6	85449960	85449991	chr6b.449960	176.117	.	15327.7	17.3668	17.0077	23
chr4	82429622	82429660	chr4.82429622	175.91	.	15309.7	21.5374	20.899	10
chrX	49029541	49029578	chrX.49029541	175.86	.	15305.4	20.941	20.3472	15
chr8	133455167	133455215	chr8.133455167	175.716	.	15292.9	27.5075	26.3196	0
chr8	143924526	143924570	chr8.143924526	175.663	.	15288.3	25.1181	24.192	18
chr9	127506440	127506480	chr9.127506440	175.519	.	15275.7	22.7304	22.0076	27
chr7	100095812	100095853	chr7.100095812	175.368	.	15262.5	23.3271	22.556	9
chr12	111453697	111453779	chr12.111453697	175.194	.	15247.4	27.6845	26.4335	47
chr2	84905714	84905745	chr2.84905714	175.155	.	15244	17.3668	17.0077	0
chr12	49330469	49330556	chr12.49330469	175.152	.	15243.8	29.3262	27.8915	13
chr4	2932648	2932700	chr4.2932648	174.952	.	15226.4	17.8113	17.4199	0
chr8	25411460	25411513	chr8.25411460	174.759	.	15209.6	18.1411	17.7133	30
chr5	31526467	31526510	chr5.31526467	174.734	.	15207.4	24.521	23.6379	32
chr1	149842348	149842431	chr1b.24842348	174.722	.	15206.3	28.0129	26.739	14
chr3	49111951	49111998	chr3.49111951	174.606	.	15196.3	26.91	25.7963	9
chr4	153335588	153335646	chr4b.69335588	173.796	.	15125.8	19.7899	19.2491	4
chr5	154815263	154815299	chr5b.70815263	173.747	.	15121.5	20.3449	19.7906	25
chr11	47165190	47165265	chr11.47165190	173.628	.	15111.2	25.3846	24.4178	59
chr8	41598375	41598407	chr8.41598375	173.438	.	15094.6	17.962	17.5628	2
chr19	41306803	41306963	chr19.41306803	173.021	.	15058.3	53.2382	50.7768	97
chr7	99419486	99419532	chr7.99419486	172.628	.	15024.1	26.3126	25.2761	21
chr11	64237494	64237537	chr11.64237494	172.515	.	15014.3	24.521	23.6379	15
chr16	69318873	69318938	chr16.69318873	171.77	.	14949.5	22.0955	21.4202	6
chr2	240569034	240569094	chr2b.146569034	171.713	.	14944.5	20.449	19.8681	42
chr11	82900231	82900319	chr11.82900231	171.262	.	14905.3	29.6544	28.1945	77
chrX	15702918	15702991	chrX.15702918	171.193	.	14899.2	24.7271	23.814	28
chr2	96297521	96297579	chr2b.2297521	171.127	.	14893.5	19.79	19.2491	3
chr2	215414870	215414908	chr2b.121414870	170.621	.	14849.5	21.5374	20.899	0
chr11	66625323	66625468	chr11.66625323	170.221	.	14814.7	48.3307	45.9605	33
chr11	63976365	63976397	chr11.63976365	169.853	.	14782.7	17.962	17.5628	22
chr8	144436313	144436357	chr8.144436313	169.761	.	14774.6	25.1181	24.192	31
chr1	25816019	25816141	chr1.25816019	169.494	.	14751.5	40.8012	38.787	43
chr12	51063836	51063894	chr12.51063836	168.86	.	14696.3	19.7899	19.2491	3
chr8	144400379	144400422	chr8.144400379	168.858	.	14696.1	24.521	23.6379	24
chr8	143918383	143918410	chr8.143918383	168.727	.	14684.7	14.9883	14.7519	5
chr2	86070181	86070215	chr2.86070181	168.628	.	14676	19.1531	18.6739	0
chr16	2176762	2176809	chr16.2176762	168.612	.	14674.6	26.91	25.7963	45
chr12	124372116	124372234	chr12.124372116	168.529	.	14667.4	39.4909	37.5347	117
chr12	48938802	48938881	chr12.48938802	168.435	.	14659.2	26.699	25.5962	17
chr21	43982971	43983003	chr21.43982971	167.676	.	14593.3	17.962	17.5628	0
chr1	32770993	32771071	chr1.32770993	167.402	.	14569.4	26.3705	25.2826	32
chr1	147620590	147620643	chr1b.22620590	167.251	.	14556.3	18.1411	17.7133	19
chr3	47406490	47406581	chr3.47406490	167.228	.	14554.2	30.639	29.1383	50
chr2	216499303	216499328	chr2b.122499303	167.105	.	14543.6	13.8008	13.6092	21
chr12	56688221	56688268	chr12.56688221	166.65	.	14504	26.91	25.7963	12
chr12	2858874	2858967	chr12.2858874	166.618	.	14501.2	31.2953	29.7668	24
chr9	128177637	128177679	chr9.128177637	166.347	.	14477.6	23.924	23.0951	7
chr5	173320610	173320671	chr5b.89320610	166.047	.	14451.4	20.7784	20.1915	23
chr9	128721245	128721291	chr9.128721245	165.615	.	14413.9	26.3126	25.2761	44
chr9	135503966	135504024	chr9.135503966	165.594	.	14412.1	19.7899	19.2491	28
chr5	173317411	173317464	chr5b.89317411	165.086	.	14367.8	18.1411	17.7133	19
chr6	34246630	34246672	chr6.34246630	164.964	.	14357.3	23.924	23.0951	2
chr6	137881721	137881756	chr6b.52881721	164.846	.	14347	19.7489	19.2358	3
chr15	43793852	43793893	chr15.43793852	164.648	.	14329.8	23.3271	22.556	0
chr5	134661431	134661513	chr5b.50661431	164.428	.	14310.6	27.6845	26.4335	0
chr17	39204571	39204628	chr17.39204571	164.235	.	14293.8	19.4603	18.9551	8
chr4	1693491	1693517	chr4.1693491	164.058	.	14278.4	14.3944	14.1796	25
chr1	26853789	26853874	chr1.26853789	163.958	.	14269.7	28.6696	27.2702	72
chr16	2766073	2766115	chr16.2766073	163.785	.	14254.6	23.924	23.0951	29
chr8	144139806	144139842	chr8.144139806	163.274	.	14210.2	20.3449	19.7906	0
chr5	6752918	6752954	chr5.6752918	162.966	.	14183.3	20.3449	19.7906	4
chr15	43746464	43746495	chr15.43746464	162.828	.	14171.4	17.3668	17.0077	24
chr10	102479281	102479329	chr10.102479281	162.753	.	14164.9	27.5075	26.3196	10
chr15	74845034	74845071	chr15.74845034	162.724	.	14162.4	20.941	20.3472	26
chr1	180197485	180197527	chr1b.55197485	162.69	.	14159.4	23.924	23.0951	22
chr7	101133782	101133819	chr7.101133782	162.558	.	14147.8	20.941	20.3472	3
chr22	36281961	36282012	chr22.36281961	162.443	.	14137.9	17.481	17.098	36
chr15	64162906	64162940	chr15.64162906	162.192	.	14116	19.1531	18.6739	15
chr12	132077551	132077597	chr12.132077551	161.76	.	14078.4	26.3126	25.2761	9
chr8	144473671	144473719	chr8.144473671	161.389	.	14046.2	16.4903	16.1739	20
chr2	203439577	203439632	chr2b.109439577	161.372	.	14044.7	18.8009	18.3337	25
chr3	150408472	150408548	chr3b.59408472	161.355	.	14043.1	25.7132	24.7338	33
chr11	65871200	65871234	chr11.65871200	160.81	.	13995.8	19.1531	18.6739	7
chr11	64256468	64256542	chr11.64256468	160.75	.	13990.6	25.0559	24.1369	6
chr11	74171407	74171459	chr11.74171407	160.608	.	13978.2	17.8111	17.4199	25
chr4	70836211	70836240	chr4.70836211	160.128	.	13936.4	16.1771	15.8883	8
chr19	49490805	49490841	chr19.49490805	160.05	.	13929.6	20.3449	19.7906	28
chr9	127505604	127505653	chr9.127505604	159.997	.	13925	16.8207	16.4718	24
chr3	50325174	50325229	chr3.50325174	159.954	.	13921.3	18.8009	18.3337	12
chr3	53242141	53242213	chr3.53242141	159.841	.	13911.5	24.3983	23.5217	25
chr19	41230989	41231029	chr19.41230989	159.769	.	13905.1	22.7304	22.0076	37
chr3	50253052	50253132	chr3.50253052	159.648	.	13894.7	27.0275	25.8665	48
chr12	120199157	120199196	chr12.120199157	159.541	.	13885.4	22.1338	21.453	28
chr4	56931261	56931295	chr4.56931261	159.364	.	13870	19.1531	18.6739	30
chr3	50258772	50258805	chr3.50258772	159.304	.	13864.7	18.5575	18.1145	15
chr13	106491058	106491090	chr13.106491058	159.172	.	13853.3	17.962	17.5628	17
chr7	149476978	149477023	chr7.149476978	159.137	.	13850.2	25.7153	24.7338	36
chr3	45224913	45224963	chr3.45224913	158.957	.	13834.5	17.1509	16.8005	0
chr16	89561257	89561300	chr16.89561257	158.944	.	13833.4	24.521	23.6379	19
chr11	119334877	119334941	chr11.119334877	158.811	.	13821.9	21.7663	21.0971	38
chr9	106939027	106939050	chr9.106939027	158.393	.	13785.4	12.6146	12.456	14
chr7	100107483	100107536	chr7.100107483	157.875	.	13740.4	18.1411	17.7133	52
chr3	39410842	39410867	chr3.39410842	157.741	.	13728.7	13.8008	13.6092	13
chr9	107283563	107283642	chr9.107283563	157.483	.	13706.3	26.699	25.5962	8
chr9	33112136	33112186	chr9.33112136	157.481	.	13706.1	17.1508	16.8005	41
chr14	73717568	73717615	chr14.73717568	157.097	.	13672.7	26.91	25.7963	37
chr12	6938917	6938986	chr12.6938917	157.044	.	13668	23.4117	22.5974	3
chr9	124356462	124356511	chr9.124356462	156.7	.	13638.1	28.1051	26.8228	32
chr15	73713637	73713724	chr15.73713637	156.561	.	13626	29.3262	27.8915	53
chr10	75399162	75399211	chr10.75399162	156.53	.	13623.4	28.1051	26.8228	24
chr12	49796132	49796228	chr12.49796132	156.429	.	13614.6	32.2795	30.6815	25
chr12	76030001	76030047	chr12.76030001	156.422	.	13613.9	26.3126	25.2761	0
chrX	9894519	9894628	chrX.9894519	156.412	.	13613.1	36.542	34.7338	16
chr3	184327237	184327281	chr3b.93327237	156.319	.	13605	25.1181	24.192	27
chr19	44820723	44820820	chr19.44820723	156.219	.	13596.3	32.6075	30.9974	62
chr7	66945115	66945163	chr7.66945115	155.934	.	13571.5	27.5075	26.3196	2
chr3	160400903	160400970	chr3b.69400903	155.908	.	13569.2	22.7537	22.0076	21
chr8	144393905	144393954	chr8.144393905	155.841	.	13563.3	28.1051	26.8228	20
chr1	207752189	207752243	chr1b.82752189	155.749	.	13555.4	18.471	18.0359	7
chr2	237368586	237368618	chr2b.143368586	155.73	.	13553.7	17.962	17.5628	18
chr1	27307381	27307476	chr1.27307381	155.719	.	13552.8	31.9514	30.3785	87
chr17	50185546	50185629	chr17.50185546	155.378	.	13523.1	28.0129	26.739	26
chr3	49705619	49705659	chr3.49705619	155.309	.	13517.1	22.7304	22.0076	15
chr14	24157907	24157964	chr14.24157907	154.229	.	13423.1	19.4603	18.9551	35
chr1	119925524	119925583	chr1.119925524	154.193	.	13419.9	20.1195	19.5718	31
chr1	1373759	1373828	chr1.1373759	154.183	.	13419.1	23.4117	22.5974	43
chr5	143223107	143223145	chr5b.59223107	154.092	.	13411.2	21.5374	20.899	6
chr17	81701064	81701122	chr17.81701064	154.035	.	13406.2	19.7899	19.2491	37
chr16	88807092	88807175	chr16.88807092	153.99	.	13402.3	28.0129	26.739	50
chr10	79298508	79298544	chr10.79298508	153.585	.	13367.1	12.5164	12.3598	23
chrX	135051516	135051548	chrX.135051516	153.551	.	13364.1	17.962	17.5628	12
chr7	2662284	2662325	chr7.2662284	153.351	.	13346.7	23.3271	22.556	20
chr1	33181538	33181639	chr1.33181538	153.096	.	13324.5	33.9193	32.2385	30
chr3	9890705	9890739	chr3.9890705	152.832	.	13301.5	19.1531	18.6739	13
chr3	127690673	127690811	chr3b.36690673	152.69	.	13289.1	46.0398	43.7546	80
chr4	70993834	70993863	chr4.70993834	152.464	.	13269.5	16.1771	15.8883	6
chr3	45225057	45225099	chr3.45225057	152.45	.	13268.3	23.924	23.0951	37
chr20	34080086	34080123	chr20.34080086	152.255	.	13251.3	20.941	20.3472	22
chr15	40624962	40625032	chr15.40624962	152.116	.	13239.2	23.7406	22.9177	27
chr3	184170630	184170681	chr3b.93170630	152.053	.	13233.8	17.481	17.098	29
chr12	131986571	131986608	chr12.131986571	152.04	.	13232.6	20.941	20.3472	4
chr1	10180084	10180131	chr1.10180084	151.851	.	13216.2	26.91	25.7963	18
chr1	153943007	153943071	chr1b.28943007	151.461	.	13182.3	21.7663	21.0971	15
chr8	22141541	22141623	chr8.22141541	151.132	.	13153.6	27.6845	26.4335	30
chr1	154970095	154970146	chr1b.29970095	150.933	.	13136.3	17.481	17.098	48
chr6	26158444	26158496	chr6.26158444	150.732	.	13118.8	17.8111	17.4199	51
chr1	45566907	45566953	chr1.45566907	150.685	.	13114.7	26.3126	25.2761	25
chr3	47588005	47588059	chr3.47588005	150.621	.	13109.1	18.471	18.0359	42
chr5	73447181	73447215	chr5.73447181	150.397	.	13089.6	19.1531	18.6739	11
chr9	33111541	33111621	chr9.33111541	150.304	.	13081.6	27.0275	25.8665	75
chr17	7591538	7591663	chr17.7591538	150.166	.	13069.5	41.7837	39.7085	55
chr16	28834581	28834604	chr16.28834581	150.124	.	13065.9	12.6146	12.456	3
chr19	13138709	13138872	chr19.13138709	149.896	.	13046.1	54.2194	51.7123	20
chr1	27405365	27405410	chr1.27405365	149.875	.	13044.2	25.7153	24.7338	42
chr1	150473045	150473101	chr1b.25473045	149.817	.	13039.2	19.1306	18.6581	0
chr20	36778987	36779029	chr20.36778987	149.691	.	13028.2	23.924	23.0951	27
chr2	27055201	27055240	chr2.27055201	149.618	.	13021.9	22.1338	21.453	19
chr7	44115351	44115403	chr7.44115351	149.597	.	13020	17.8111	17.4199	31
chr1	223951794	223951914	chr1b.98951794	149.356	.	12999.1	40.1461	38.1618	6
chr6	43020716	43020740	chr6.43020716	149.182	.	12983.9	13.2075	13.0332	23
chr14	75176428	75176502	chr14.75176428	149.043	.	12971.9	25.0559	24.1369	57
chrX	153870461	153870511	chrX.153870461	148.981	.	12966.4	17.1508	16.8005	26
chr11	65890268	65890355	chr11.65890268	148.93	.	12962	29.3262	27.8915	43
chr5	73448676	73448709	chr5.73448676	148.919	.	12961	18.5575	18.1145	3
chr7	100886827	100886865	chr7.100886827	148.735	.	12945	21.5374	20.899	21
chr7	2256895	2256928	chr7.2256895	148.577	.	12931.3	18.5575	18.1145	32
chr7	130887237	130887272	chr7.130887237	148.196	.	12898.1	19.7489	19.2358	1
chr12	124362250	124362288	chr12.124362250	148.002	.	12881.2	21.5374	20.899	32
chr1	1047804	1047846	chr1.1047804	147.975	.	12878.9	23.924	23.0951	26
chr21	43757551	43757589	chr21.43757551	147.915	.	12873.7	21.5374	20.899	21
chr15	64703063	64703109	chr15.64703063	147.897	.	12872.1	26.3126	25.2761	4
chr16	18838062	18838092	chr16.18838062	147.508	.	12838.2	16.7718	16.4537	15
chr2	175181441	175181471	chr2b.81181441	147.247	.	12815.5	16.7718	16.4537	18
chr17	4945827	4945891	chr17.4945827	147.101	.	12802.8	21.7663	21.0971	27
chr2	86031377	86031428	chr2.86031377	146.997	.	12793.8	17.481	17.098	43
chr8	61684103	61684151	chr8.61684103	146.639	.	12762.7	27.5075	26.3196	8
chr11	12528089	12528153	chr11.12528089	146.45	.	12746.2	21.7663	21.0971	27
chr2	218281967	218282000	chr2b.124281967	146.288	.	12732.1	18.5575	18.1145	16
chr13	79366719	79366780	chr13.79366719	145.918	.	12699.9	20.7839	20.1915	7
chr5	134579337	134579376	chr5b.50579337	145.156	.	12633.6	22.1338	21.453	21
chr1	183544449	183544489	chr1b.58544449	145.153	.	12633.3	22.7304	22.0076	0
chr16	29988058	29988136	chr16.29988058	145.066	.	12625.8	26.3705	25.2826	44
chr19	6415045	6415134	chr19.6415045	144.625	.	12587.4	29.9827	28.5066	59
chr3	52075834	52075893	chr3.52075834	144.326	.	12561.4	20.1195	19.5718	8
chr10	100913003	100913058	chr10.100913003	144.256	.	12555.3	18.8009	18.3337	42
chr1	28280881	28280920	chr1.28280881	144.094	.	12541.2	22.1338	21.453	38
chr1	36171183	36171255	chr1.36171183	144.012	.	12534.1	24.3983	23.5217	10
chr5	31526340	31526410	chr5.31526340	143.956	.	12529.2	23.7406	22.9177	6
chr17	63703152	63703276	chr17.63703152	143.935	.	12527.3	41.4562	39.4042	62
chr14	102232563	102232598	chr14.102232563	143.793	.	12515	19.7489	19.2358	9
chr7	44766469	44766515	chr7.44766469	143.239	.	12466.8	26.3126	25.2761	5
chr5	466926	466953	chr5.466926	143.062	.	12451.4	14.9883	14.7519	12
chr15	81003326	81003374	chr15.81003326	143.059	.	12451.1	27.5075	26.3196	11
chr1	22091642	22091714	chr1.22091642	143.055	.	12450.7	24.3983	23.5217	29
chr4	7054211	7054246	chr4.7054211	143.028	.	12448.4	19.7489	19.2358	31
chr17	50133957	50134098	chr17.50133957	142.95	.	12441.7	47.0217	44.7065	48
chr4	1978976	1979021	chr4.1978976	142.89	.	12436.4	25.7153	24.7338	26
chr20	44006595	44006633	chr20.44006595	142.674	.	12417.7	21.5374	20.899	21
chr11	82824997	82825044	chr11.82824997	142.307	.	12385.7	26.91	25.7963	17
chr8	143928492	143928544	chr8.143928492	141.678	.	12330.9	17.8111	17.4199	48
chrX	71118727	71118773	chrX.71118727	141.645	.	12328.1	26.3126	25.2761	20
chr4	1212934	1212958	chr4.1212934	141.482	.	12313.9	13.2075	13.0332	18
chrX	154399514	154399552	chrX.154399514	141.172	.	12286.9	21.5374	20.899	32
chr2	73075381	73075456	chr2.73075381	141.069	.	12277.9	25.3846	24.4178	42
chr10	17708823	17708886	chr10.17708823	140.981	.	12270.3	21.437	20.8046	37
chr7	100107966	100108045	chr7.100107966	140.528	.	12230.8	26.699	25.5962	67
chr5	157791798	157791841	chr5b.73791798	140.447	.	12223.8	24.521	23.6379	33
chr7	47368531	47368636	chr7.47368531	140.355	.	12215.8	35.2308	33.4964	16
chr14	23065823	23065868	chr14.23065823	140.166	.	12199.4	25.7153	24.7338	32
chr22	40856517	40856586	chr22.40856517	140.162	.	12199.1	23.4117	22.5974	27
chr22	39313681	39313718	chr22.39313681	139.655	.	12154.9	20.941	20.3472	19
chr13	110492085	110492115	chr13.110492085	139.654	.	12154.9	16.7718	16.4537	19
chr10	101003962	101004039	chr10.101003962	139.547	.	12145.5	26.0419	25.0162	14
chr3	120348821	120348963	chr3b.29348821	139.516	.	12142.8	47.349	45.0126	5
chr3	86968885	86968930	chr3.86968885	139.482	.	12139.8	25.7153	24.7338	25
chr12	6537877	6537902	chr12.6537877	139.084	.	12105.2	13.8008	13.6092	17
chr8	143927072	143927122	chr8.143927072	138.999	.	12097.8	17.1508	16.8005	19
chr3	58155964	58156030	chr3.58155964	138.991	.	12097.2	22.4246	21.7075	47
chr22	20586659	20586703	chr22.20586659	138.931	.	12091.9	25.1181	24.192	8
chr8	22104140	22104178	chr8.22104140	138.834	.	12083.5	21.5374	20.899	15
chr6	11190932	11190976	chr6.11190932	138.79	.	12079.6	25.1181	24.192	21
chr8	144792019	144792061	chr8.144792019	138.689	.	12070.9	23.924	23.0951	24
chr17	38920471	38920525	chr17.38920471	138.609	.	12063.9	18.471	18.0359	14
chr7	74122140	74122223	chr7.74122140	138.579	.	12061.3	28.0129	26.739	36
chr17	77499300	77499413	chr17.77499300	138.279	.	12035.2	37.8528	35.9712	64
chr7	75888070	75888121	chr7.75888070	138.23	.	12030.9	17.481	17.098	30
chr9	128981280	128981329	chr9.128981280	138.168	.	12025.5	28.1051	26.8228	30
chr16	786222	786316	chr16.786222	138.145	.	12023.5	31.6234	30.0669	57
chr8	25411234	25411276	chr8.25411234	138.108	.	12020.3	23.924	23.0951	18
chr3	184261121	184261219	chr3b.93261121	137.941	.	12005.7	32.9355	31.3088	57
chr11	65607929	65607972	chr11.65607929	137.8	.	11993.5	24.521	23.6379	37
chrX	149479974	149480012	chrX.149479974	137.621	.	11977.9	21.5374	20.899	8
chr15	71777794	71777831	chr15.71777794	137.564	.	11972.9	20.941	20.3472	30
chr7	131509423	131509498	chr7.131509423	137.469	.	11964.7	25.3846	24.4178	0
chr21	46129247	46129292	chr21.46129247	137.436	.	11961.8	25.7153	24.7338	18
chr19	48966386	48966432	chr19.48966386	136.979	.	11922	26.3126	25.2761	7
chr1	180196986	180197054	chr1b.55196986	136.957	.	11920.2	23.0827	22.3174	38
chrX	153955302	153955346	chrX.153955302	136.9	.	11915.2	25.1181	24.192	42
chr7	73536645	73536690	chr7.73536645	136.792	.	11905.8	25.7153	24.7338	27
chr20	32433584	32433648	chr20.32433584	136.701	.	11897.9	21.7663	21.0971	15
chr20	34742661	34742731	chr20.34742661	136.535	.	11883.4	23.7406	22.9177	24
chr11	65499091	65499119	chr11.65499091	136.407	.	11872.2	15.5826	15.3205	8
chr7	72925722	72925751	chr7.72925722	136.339	.	11866.3	16.1771	15.8883	0
chr1	15935483	15935548	chr1.15935483	136.262	.	11859.6	22.0955	21.4202	38
chr7	75536318	75536402	chr7.75536318	136.243	.	11858	28.3412	26.9698	44
chr1	234607506	234607583	chr1b.109607506	136.163	.	11851	26.0419	25.0162	23
chr14	103491891	103491945	chr14.103491891	136.125	.	11847.7	18.471	18.0359	36
chr21	31685118	31685161	chr21.31685118	136.015	.	11838.2	14.837	14.603	37
chrX	40654406	40654441	chrX.40654406	135.966	.	11833.9	19.7489	19.2358	11
chr14	105470368	105470410	chr14.105470368	135.935	.	11831.2	23.924	23.0951	6
chr12	6534851	6534897	chr12.6534851	135.866	.	11825.2	26.3126	25.2761	10
chr16	87412779	87412877	chr16.87412779	135.807	.	11820.1	32.9355	31.3088	54
chr11	67256507	67256565	chr11.67256507	135.736	.	11813.9	19.7899	19.2491	39
chrX	135033312	135033354	chrX.135033312	135.668	.	11808	23.924	23.0951	0
chr8	144291682	144291726	chr8.144291682	135.443	.	11788.4	25.1181	24.192	20
chr11	8684019	8684076	chr11.8684019	135.392	.	11783.9	19.4603	18.9551	46
chr5	132758630	132758669	chr5b.48758630	135.181	.	11765.6	22.1338	21.453	14
chr12	753944	753993	chr12.753944	135.155	.	11763.3	28.1051	26.8228	35
chr8	144262969	144262999	chr8.144262969	135.115	.	11759.9	16.7718	16.4537	1
chr2	73252813	73252855	chr2.73252813	135.113	.	11759.7	23.924	23.0951	36
chr7	158733019	158733106	chr7.158733019	135.069	.	11755.9	29.3263	27.8915	47
chr3	49125991	49126028	chr3.49125991	135.048	.	11754	20.941	20.3472	5
chr14	77511912	77511959	chr14.77511912	134.941	.	11744.7	26.91	25.7963	18
chr2	43224538	43224575	chr2.43224538	134.877	.	11739.2	20.941	20.3472	0
chr19	17861320	17861369	chr19.17861320	134.844	.	11736.2	28.1051	26.8228	36
chr8	143991908	143991961	chr8.143991908	134.812	.	11733.5	18.1411	17.7133	27
chr11	65891391	65891428	chr11.65891391	134.802	.	11732.6	20.941	20.3472	14
chr1	226390508	226390546	chr1b.101390508	134.499	.	11706.2	21.5374	20.899	5
chrX	154030001	154030030	chrX.154030001	134.203	.	11680.5	16.1771	15.8883	27
chr1	31434411	31434459	chr1.31434411	134.108	.	11672.3	27.5075	26.3196	2
chr12	6927675	6927721	chr12.6927675	133.926	.	11656.4	26.3126	25.2761	45
chr9	127506977	127507018	chr9.127506977	133.922	.	11656	23.3271	22.556	17
chr4	2829522	2829578	chr4.2829522	133.751	.	11641.2	19.1309	18.6581	24
chr8	144107473	144107497	chr8.144107473	133.685	.	11635.4	13.2075	13.0332	22
chr1	154344195	154344240	chr1b.29344195	133.571	.	11625.5	25.7153	24.7338	30
chr11	61404546	61404598	chr11.61404546	133.54	.	11622.8	17.8111	17.4199	26
chr3	49121154	49121190	chr3.49121154	133.514	.	11620.6	20.3449	19.7906	32
chr16	23683886	23683961	chr16.23683886	133.331	.	11604.7	25.3846	24.4178	37
chr12	131982351	131982414	chr12.131982351	133.007	.	11576.5	21.437	20.8046	14
chr5	173328092	173328128	chr5b.89328092	132.904	.	11567.5	20.3449	19.7906	0
chr12	48693060	48693100	chr12.48693060	132.757	.	11554.7	22.7304	22.0076	5
chr1	25817023	25817116	chr1.25817023	132.729	.	11552.2	31.2953	29.7668	51
chr4	6587045	6587091	chr4.6587045	132.702	.	11549.9	15.8292	15.5448	16
chrX	54815394	54815450	chrX.54815394	132.208	.	11506.9	19.1306	18.6581	24
chr4	118815474	118815515	chr4b.34815474	132.173	.	11503.8	23.3271	22.556	24
chrX	154357491	154357510	chrX.154357491	132.128	.	11499.9	10.2473	10.1422	17
chr7	74121157	74121204	chr7.74121157	132.003	.	11489	26.91	25.7963	27
chr5	146457204	146457248	chr5b.62457204	131.913	.	11481.2	25.1181	24.192	12
chr9	133363411	133363459	chr9.133363411	131.883	.	11478.6	27.5075	26.3196	12
chr16	2974041	2974084	chr16.2974041	131.872	.	11477.7	24.521	23.6379	8
chr3	9806955	9807019	chr3.9806955	131.763	.	11468.1	21.7663	21.0971	60
chr5	62403703	62403747	chr5.62403703	131.429	.	11439.1	25.1181	24.192	31
chr12	6941775	6941828	chr12.6941775	131.351	.	11432.3	18.1411	17.7133	25
chr20	43702656	43702708	chr20.43702656	131.295	.	11427.5	17.8111	17.4199	18
chr22	29049470	29049551	chr22.29049470	130.871	.	11390.6	27.356	26.1802	42
chr12	6766568	6766637	chr12.6766568	130.587	.	11365.8	23.4117	22.5974	63
chr5	179774641	179774688	chr5b.95774641	130.507	.	11358.9	26.91	25.7963	0
chr1	36177935	36177987	chr1.36177935	130.496	.	11357.9	17.8111	17.4199	41
chr5	14431144	14431168	chr5.14431144	130.241	.	11335.7	13.2075	13.0332	0
chr5	160253528	160253561	chr5b.76253528	129.969	.	11312	18.5575	18.1145	10
chr20	46061455	46061560	chr20.46061455	129.889	.	11305.1	35.2308	33.4964	73
chr2	238268130	238268168	chr2b.144268130	129.836	.	11300.5	21.5374	20.899	27
chr10	102106718	102106746	chr10.102106718	129.66	.	11285.2	15.5826	15.3205	3
chr19	2248069	2248172	chr19.2248069	129.572	.	11277.5	34.5751	32.8645	54
chr4	1983936	1983986	chr4.1983936	129.266	.	11250.9	17.1508	16.8005	6
chr1	20499676	20499747	chr1.20499676	129.01	.	11228.6	24.0695	23.1988	22
chr5	14488133	14488171	chr5.14488133	128.866	.	11216.1	21.5374	20.899	6
chr2	54664546	54664576	chr2.54664546	128.774	.	11208	16.7718	16.4537	15
chr7	131501940	131501978	chr7.131501940	128.77	.	11207.7	21.5374	20.899	18
chr2	74048216	74048291	chr2.74048216	128.728	.	11204.1	25.3846	24.4178	31
chr11	119419224	119419263	chr11.119419224	128.709	.	11202.4	22.1338	21.453	3
chr5	14144441	14144477	chr5.14144441	128.451	.	11180	20.3449	19.7906	35
chr5	134649057	134649100	chr5b.50649057	128.403	.	11175.8	24.521	23.6379	8
chr10	97641077	97641107	chr10.97641077	128.386	.	11174.3	16.7718	16.4537	15
chr6	36108425	36108467	chr6.36108425	127.661	.	11111.2	23.924	23.0951	17
chr1	9730275	9730348	chr1.9730275	127.46	.	11093.7	24.7271	23.814	16
chr2	46380259	46380325	chr2.46380259	127.458	.	11093.6	22.4246	21.7075	20
chr1	93346408	93346484	chr1.93346408	127.423	.	11090.5	25.7132	24.7338	57
chr12	48935173	48935232	chr12.48935173	127.377	.	11086.5	20.1195	19.5718	55
chr1	165728011	165728062	chr1b.40728011	127.14	.	11065.9	17.481	17.098	22
chr6	110614543	110614576	chr6b.25614543	127.104	.	11062.8	11.5194	11.38	5
chr8	22606127	22606159	chr8.22606127	126.969	.	11051	17.962	17.5628	1
chr21	34834422	34834471	chr21.34834422	126.948	.	11049.2	28.1051	26.8228	30
chr22	50465271	50465328	chr22.50465271	126.796	.	11036	19.4603	18.9551	50
chr15	74631565	74631603	chr15.74631565	126.731	.	11030.3	21.5374	20.899	21
chr3	51662900	51662944	chr3.51662900	126.673	.	11025.2	25.1181	24.192	4
chr1	156738643	156738692	chr1b.31738643	126.425	.	11003.6	28.1051	26.8228	18
chr16	70661555	70661612	chr16.70661555	126.329	.	10995.3	19.4603	18.9551	30
chr5	137753471	137753503	chr5b.53753471	126.079	.	10973.6	17.962	17.5628	12
chr10	102382112	102382171	chr10.102382112	126.036	.	10969.8	20.1195	19.5718	34
chr19	3053305	3053427	chr19.3053305	126.028	.	10969.1	40.8012	38.787	8
chr12	14790493	14790531	chr12.14790493	125.7	.	10940.6	21.5374	20.899	16
chr21	43982800	43982858	chr21.43982800	125.609	.	10932.7	19.7899	19.2491	5
chr9	127692221	127692273	chr9.127692221	125.496	.	10922.9	17.8111	17.4199	23
chr14	95533367	95533407	chr14.95533367	125.453	.	10919	22.7304	22.0076	39
chr2	226797881	226797916	chr2b.132797881	125.275	.	10903.6	19.7489	19.2358	19
chr16	30357270	30357352	chr16.30357270	125.204	.	10897.4	27.6845	26.4335	15
chr7	128652297	128652389	chr7.128652297	125.165	.	10894.1	30.9672	29.4536	72
chr14	74782023	74782066	chr14.74782023	125.029	.	10882.2	14.8368	14.603	5
chr15	75688609	75688665	chr15.75688609	124.991	.	10878.9	19.1306	18.6581	0
chr19	48965412	48965449	chr19.48965412	124.876	.	10868.9	20.941	20.3472	19
chr5	178147774	178147824	chr5b.94147774	124.853	.	10866.9	17.1508	16.8005	11
chr12	47844252	47844301	chr12.47844252	124.708	.	10854.3	28.1051	26.8228	23
chr10	102382796	102382833	chr10.102382796	124.702	.	10853.7	20.941	20.3472	6
chr14	22846328	22846381	chr14.22846328	124.601	.	10845	18.1411	17.7133	8
chr11	66243619	66243703	chr11.66243619	124.504	.	10836.5	28.3412	26.9698	66
chrX	49250340	49250398	chrX.49250340	124.446	.	10831.5	19.7899	19.2491	17
chr6	110621127	110621165	chr6b.25621127	124.443	.	10831.2	13.1807	13.0077	29
chr12	6941428	6941528	chr12.6941428	124.398	.	10827.3	33.5914	31.9248	0
chr16	56425231	56425312	chr16.56425231	124.341	.	10822.3	27.356	26.1802	20
chr16	70158068	70158113	chr16.70158068	124.297	.	10818.5	25.7153	24.7338	29
chr17	39204154	39204199	chr17.39204154	124.068	.	10798.6	25.7153	24.7338	25
chr7	130305831	130305869	chr7.130305831	123.982	.	10791.1	21.5374	20.899	35
chr2	127865045	127865093	chr2b.33865045	123.971	.	10790.1	27.5075	26.3196	24
chr15	48537650	48537713	chr15.48537650	123.925	.	10786.1	21.437	20.8046	26
chr17	42613915	42613952	chr17.42613915	123.738	.	10769.9	20.941	20.3472	18
chr16	84566673	84566731	chr16.84566673	123.634	.	10760.8	19.79	19.2491	15
chr20	49633858	49633920	chr20.49633858	123.528	.	10751.6	21.1077	20.4836	49
chrX	47186506	47186545	chrX.47186506	123.496	.	10748.8	22.1338	21.453	6
chr12	113260408	113260441	chr12.113260408	123.44	.	10744	11.52	11.38	14
chr1	1217361	1217463	chr1.1217361	123.296	.	10731.4	34.2472	32.5567	20
chr3	184171382	184171412	chr3b.93171382	123.269	.	10729.1	16.7718	16.4537	8
chr6	34240840	34240865	chr6.34240840	123.107	.	10715	13.8008	13.6092	2
chr9	130884061	130884103	chr9.130884061	123.081	.	10712.7	23.924	23.0951	34
chr17	38920230	38920262	chr17.38920230	123.053	.	10710.3	17.962	17.5628	12
chr21	45531736	45531765	chr21.45531736	122.773	.	10685.9	16.1771	15.8883	0
chr8	143932673	143932721	chr8.143932673	122.7	.	10679.5	27.5075	26.3196	11
chr2	86025636	86025684	chr2.86025636	122.646	.	10674.8	27.5075	26.3196	30
chr9	128714823	128714869	chr9.128714823	122.608	.	10671.5	26.3126	25.2761	16
chr7	97966818	97966888	chr7.97966818	122.456	.	10658.3	23.7406	22.9177	30
chr10	103602691	103602717	chr10.103602691	122.293	.	10644.1	14.3944	14.1796	23
chr12	132069528	132069564	chr12.132069528	122.248	.	10640.2	20.3449	19.7906	33
chr7	4764762	4764811	chr7.4764762	122.236	.	10639.1	28.1051	26.8228	30
chr1	158088017	158088063	chr1b.33088017	122.13	.	10630	26.3126	25.2761	34
chr12	57821220	57821301	chr12.57821220	122.113	.	10628.4	27.356	26.1802	33
chr6	17615911	17615973	chr6.17615911	122.034	.	10621.5	21.1077	20.4836	9
chr1	85581401	85581470	chr1.85581401	122.017	.	10620.1	23.4117	22.5974	43
chr10	73797893	73797935	chr10.73797893	121.934	.	10612.9	23.924	23.0951	41
chr9	129148565	129148597	chr9.129148565	121.904	.	10610.2	17.962	17.5628	14
chr16	28964076	28964161	chr16.28964076	121.807	.	10601.8	28.6696	27.2702	42
chr6	113970874	113970926	chr6b.28970874	121.78	.	10599.5	17.8111	17.4199	2
chr1	19222713	19222752	chr1.19222713	121.632	.	10586.6	22.1338	21.453	0
chr8	100706896	100706924	chr8.100706896	121.341	.	10561.3	15.5826	15.3205	27
chr2	105280505	105280533	chr2b.11280505	121.266	.	10554.7	15.5826	15.3205	0
chr17	50185794	50185843	chr17.50185794	121.221	.	10550.9	28.1051	26.8228	38
chr12	49329018	49329050	chr12.49329018	121.137	.	10543.5	17.962	17.5628	4
chr17	42843044	42843079	chr17.42843044	120.737	.	10508.7	19.7489	19.2358	22
chr16	2253963	2253998	chr16.2253963	120.725	.	10507.7	19.7489	19.2358	12
chr1	58782053	58782140	chr1.58782053	120.565	.	10493.7	29.3262	27.8915	35
chr1	956132	956200	chr1.956132	120.437	.	10482.6	23.0827	22.3174	22
chr16	67957905	67957982	chr16.67957905	120.119	.	10454.9	26.0419	25.0162	49
chr14	102233571	102233612	chr14.102233571	119.816	.	10428.5	14.1746	13.9626	35
chr5	62306241	62306281	chr5.62306241	119.805	.	10427.6	22.7304	22.0076	28
chr14	21075669	21075717	chr14.21075669	119.749	.	10422.7	27.5075	26.3196	27
chr11	70407589	70407653	chr11.70407589	119.599	.	10409.7	21.7663	21.0971	16
chr5	147509808	147509846	chr5b.63509808	119.489	.	10400.1	21.5374	20.899	0
chr16	1962255	1962295	chr16.1962255	119.415	.	10393.6	22.7304	22.0076	5
chr2	28413608	28413646	chr2.28413608	119.377	.	10390.4	21.5374	20.899	18
chr12	120211505	120211589	chr12.120211505	119.35	.	10388	28.3412	26.9698	28
chr2	241633334	241633377	chr2b.147633334	119.317	.	10385.2	24.521	23.6379	8
chr3	47852640	47852699	chr3.47852640	119.046	.	10361.6	20.1195	19.5718	44
chr14	68790204	68790250	chr14.68790204	119.032	.	10360.3	26.3126	25.2761	4
chr12	6329814	6329869	chr12.6329814	118.981	.	10355.9	18.8009	18.3337	13
chr3	146528741	146528776	chr3b.55528741	118.884	.	10347.5	19.7489	19.2358	11
chr14	22877617	22877647	chr14.22877617	118.81	.	10341.1	16.7718	16.4537	2
chr17	7251459	7251509	chr17.7251459	118.645	.	10326.7	17.1508	16.8005	23
chr10	17230673	17230724	chr10.17230673	118.632	.	10325.5	17.481	17.098	7
chr21	46664507	46664533	chr21.46664507	118.347	.	10300.8	14.3944	14.1796	1
chr5	73890248	73890305	chr5.73890248	118.265	.	10293.6	19.4603	18.9551	32
chr5	140117917	140117994	chr5b.56117917	118.219	.	10289.6	26.0423	25.0162	16
chr17	1520438	1520513	chr17.1520438	118.199	.	10287.9	25.3846	24.4178	47
chr20	388207	388243	chr20.388207	118.104	.	10279.6	20.3449	19.7906	0
chr15	82261759	82261836	chr15.82261759	118.098	.	10279.1	26.0419	25.0162	30
chr6	41587435	41587483	chr6.41587435	118.016	.	10272	27.5075	26.3196	2
chr11	65636460	65636515	chr11.65636460	117.79	.	10252.3	18.8009	18.3337	2
chr16	1964533	1964581	chr16.1964533	117.631	.	10238.4	27.5075	26.3196	34
chr3	48594690	48594781	chr3.48594690	117.572	.	10233.3	30.639	29.1383	83
chr12	53475036	53475141	chr12.53475036	117.565	.	10232.7	35.2308	33.4964	8
chr17	7226455	7226539	chr17.7226455	117.51	.	10227.9	28.3413	26.9698	68
chr11	66239176	66239213	chr11.66239176	117.43	.	10221	20.941	20.3472	15
chr2	10123017	10123050	chr2.10123017	117.329	.	10212.1	18.5575	18.1145	22
chr15	68820780	68820810	chr15.68820780	117.24	.	10204.5	16.7718	16.4537	24
chr11	66858202	66858263	chr11.66858202	116.767	.	10163.2	20.7785	20.1915	14
chr14	77025309	77025359	chr14.77025309	116.751	.	10161.8	17.1508	16.8005	17
chr1	176206603	176206642	chr1b.51206603	116.471	.	10137.5	22.1338	21.453	7
chr2	218638555	218638582	chr2b.124638555	116.412	.	10132.3	14.9883	14.7519	5
chr10	33179666	33179728	chr10.33179666	116.227	.	10116.3	21.1077	20.4836	0
chr12	53443476	53443505	chr12.53443476	116.217	.	10115.4	16.1771	15.8883	0
chr7	100089054	100089101	chr7.100089054	115.909	.	10088.6	26.91	25.7963	23
chr5	177433201	177433263	chr5b.93433201	115.843	.	10082.9	21.1077	20.4836	23
chr10	73911170	73911206	chr10.73911170	115.693	.	10069.8	20.3449	19.7906	22
chr7	75424124	75424147	chr7.75424124	115.671	.	10067.9	12.6146	12.456	0
chr1	150509973	150510010	chr1b.25509973	115.643	.	10065.4	20.941	20.3472	6
chr11	65599432	65599509	chr11.65599432	115.354	.	10040.3	26.0419	25.0162	41
chr7	139567141	139567174	chr7.139567141	115.274	.	10033.3	18.5575	18.1145	4
chr19	41306580	41306710	chr19.41306580	115.019	.	10011.1	43.4209	41.3149	61
chr11	12263420	12263479	chr11.12263420	114.934	.	10003.7	20.1195	19.5718	27
chr15	75206726	75206762	chr15.75206726	114.823	.	9994.1	20.3449	19.7906	33
chr3	119824918	119825011	chr3b.28824918	114.817	.	9993.58	31.2953	29.7668	83
chr4	10101689	10101738	chr4.10101689	114.632	.	9977.44	28.1051	26.8228	2
chr21	34858661	34858735	chr21.34858661	114.626	.	9976.92	25.0559	24.1369	33
chr13	45969112	45969153	chr13.45969112	114.524	.	9968.08	23.3271	22.556	24
chr7	56104379	56104414	chr7.56104379	114.519	.	9967.61	19.7489	19.2358	24
chr7	143381697	143381737	chr7.143381697	114.339	.	9951.98	22.7304	22.0076	29
chr12	110348245	110348278	chr12.110348245	114.326	.	9950.83	18.5575	18.1145	5
chr12	124343085	124343137	chr12.124343085	114.258	.	9944.89	17.8111	17.4199	40
chr3	105367359	105367393	chr3b.14367359	114.171	.	9937.39	19.1531	18.6739	3
chr5	10680927	10680965	chr5.10680927	114.039	.	9925.86	21.5374	20.899	30
chr2	206160598	206160629	chr2b.112160598	113.954	.	9918.49	17.3668	17.0077	26
chr8	27598103	27598130	chr8.27598103	113.894	.	9913.23	14.9883	14.7519	0
chr12	53307513	53307556	chr12.53307513	113.751	.	9900.8	24.521	23.6379	7
chrX	153959471	153959504	chrX.153959471	113.729	.	9898.92	18.5575	18.1145	16
chr16	31078875	31078935	chr16.31078875	113.637	.	9890.88	20.449	19.8681	16
chr20	36653333	36653357	chr20.36653333	113.557	.	9883.96	13.2075	13.0332	18
chr4	2514803	2514832	chr4.2514803	113.531	.	9881.7	16.1771	15.8883	9
chr11	67497386	67497435	chr11.67497386	113.497	.	9878.73	28.1051	26.8228	16
chr16	75242582	75242660	chr16.75242582	113.493	.	9878.33	26.3705	25.2826	36
chr3	129316005	129316039	chr3b.38316005	113.421	.	9872.09	19.1531	18.6739	0
chr20	62307631	62307683	chr20.62307631	113.143	.	9847.94	17.8111	17.4199	19
chr12	122133624	122133710	chr12.122133624	113.073	.	9841.83	28.9979	27.5832	4
chr7	139575174	139575220	chr7.139575174	113.052	.	9839.97	26.3126	25.2761	13
chr9	136849825	136849866	chr9.136849825	113.031	.	9838.17	23.3271	22.556	29
chr7	107759049	107759106	chr7.107759049	112.981	.	9833.82	19.4603	18.9551	20
chr9	76612516	76612584	chr9.76612516	112.766	.	9815.11	23.0827	22.3174	46
chr13	102800623	102800673	chr13.102800623	112.554	.	9796.64	19.48	18.9677	3
chr2	234495650	234495729	chr2b.140495650	112.522	.	9793.88	26.699	25.5962	25
chr7	73537190	73537228	chr7.73537190	112.121	.	9758.95	21.5374	20.899	22
chr14	74500485	74500566	chr14.74500485	111.838	.	9734.32	27.356	26.1802	62
chr10	17234732	17234753	chr10.17234732	111.813	.	9732.13	11.43	11.2996	16
chr10	5456622	5456665	chr10.5456622	111.809	.	9731.84	24.521	23.6379	20
chr7	102473551	102473616	chr7.102473551	111.711	.	9723.33	22.0955	21.4202	4
chr9	131476282	131476337	chr9.131476282	111.581	.	9712.01	18.8009	18.3337	15
chr9	136476288	136476360	chr9.136476288	111.557	.	9709.9	24.3983	23.5217	69
chr11	72109672	72109711	chr11.72109672	111.54	.	9708.38	22.1338	21.453	1
chr1	9264647	9264684	chr1.9264647	111.528	.	9707.35	20.941	20.3472	7
chr9	123104273	123104306	chr9.123104273	111.507	.	9705.54	18.5575	18.1145	16
chr15	75467405	75467440	chr15.75467405	111.444	.	9700.03	19.7489	19.2358	4
chr10	117374944	117374983	chr10.117374944	111.438	.	9699.52	22.1338	21.453	0
chrX	10143267	10143305	chrX.10143267	111.374	.	9693.94	21.5374	20.899	7
chr2	175114074	175114102	chr2b.81114074	111.27	.	9684.88	15.5826	15.3205	11
chr4	82844402	82844454	chr4.82844402	111.254	.	9683.55	17.8111	17.4199	0
chr15	89575537	89575577	chr15.89575537	111.206	.	9679.36	22.7304	22.0076	1
chr8	47961027	47961056	chr8.47961027	111.167	.	9675.99	16.1771	15.8883	0
chr20	33676214	33676271	chr20.33676214	111.154	.	9674.82	19.4603	18.9551	23
chr12	48830423	48830492	chr12.48830423	111.136	.	9673.23	23.4117	22.5974	41
chr15	48516214	48516256	chr15.48516214	110.997	.	9661.14	23.924	23.0951	14
chr13	113861594	113861650	chr13.113861594	110.979	.	9659.56	19.1306	18.6581	0
chr15	34361432	34361492	chr15.34361432	110.944	.	9656.51	20.449	19.8681	13
chr4	39977641	39977677	chr4.39977641	110.899	.	9652.67	20.3449	19.7906	0
chr20	4854011	4854077	chr20.4854011	110.891	.	9651.95	22.4246	21.7075	36
chr3	168095299	168095347	chr3b.77095299	110.887	.	9651.62	27.5075	26.3196	10
chr3	127676332	127676359	chr3b.36676332	110.871	.	9650.23	14.9883	14.7519	3
chr20	36050669	36050733	chr20.36050669	110.648	.	9630.82	21.7663	21.0971	24
chr7	143382392	143382448	chr7.143382392	110.536	.	9621.06	19.1306	18.6581	41
chrX	154441771	154441815	chrX.154441771	110.502	.	9618.09	25.1181	24.192	10
chrX	153952522	153952554	chrX.153952522	110.438	.	9612.52	17.962	17.5628	31
chr3	63988172	63988243	chr3.63988172	110.281	.	9598.88	24.0696	23.1988	41
chr2	175114696	175114755	chr2b.81114696	110.205	.	9592.2	20.1195	19.5718	37
chrX	153951850	153951901	chrX.153951850	110.185	.	9590.49	17.481	17.098	28
chr5	10353766	10353791	chr5.10353766	110.148	.	9587.28	13.8008	13.6092	15
chr7	4761172	4761229	chr7.4761172	110.007	.	9575.03	19.4603	18.9551	20
chr6	12296127	12296161	chr6.12296127	109.942	.	9569.37	19.1531	18.6739	16
chr14	50118664	50118711	chr14.50118664	109.927	.	9568.05	26.91	25.7963	0
chr20	3753898	3753960	chr20.3753898	109.897	.	9565.41	21.1078	20.4836	11
chr5	10747342	10747392	chr5.10747342	109.88	.	9563.96	19.48	18.9677	5
chr3	185925553	185925603	chr3b.94925553	109.765	.	9553.98	17.1508	16.8005	8
chr9	132691144	132691180	chr9.132691144	109.64	.	9543.07	20.3449	19.7906	11
chr2	101272950	101272978	chr2b.7272950	109.39	.	9521.3	15.5826	15.3205	24
chr1	43172193	43172229	chr1.43172193	109.345	.	9517.45	20.3449	19.7906	11
chr5	128538106	128538150	chr5b.44538106	109.3	.	9513.47	25.1181	24.192	21
chr2	180982082	180982135	chr2b.86982082	109.291	.	9512.7	18.1411	17.7133	43
chr10	113165611	113165641	chr10.113165611	109.28	.	9511.79	16.7718	16.4537	25
chr16	2103754	2103836	chr16.2103754	109.156	.	9501	27.6845	26.4335	27
chr2	74460283	74460310	chr2.74460283	109.129	.	9498.59	14.9883	14.7519	0
chr11	65423424	65423474	chr11.65423424	109.07	.	9493.52	17.1508	16.8005	46
chr11	64766003	64766056	chr11.64766003	109.064	.	9492.92	18.1412	17.7133	45
chr16	28982420	28982510	chr16.28982420	108.94	.	9482.16	30.3109	28.8226	21
chr1	41009461	41009510	chr1.41009461	108.935	.	9481.71	28.1051	26.8228	34
chr9	137216552	137216591	chr9.137216552	108.906	.	9479.21	22.1338	21.453	9
chr1	156044049	156044095	chr1b.31044049	108.852	.	9474.51	26.3126	25.2761	26
chr12	56163699	56163738	chr12.56163699	108.81	.	9470.86	22.1338	21.453	6
chr4	73258677	73258724	chr4.73258677	108.683	.	9459.82	18.3491	17.9144	2
chr4	2932051	2932082	chr4.2932051	108.607	.	9453.22	17.3668	17.0077	3
chr20	36784993	36785048	chr20.36784993	108.481	.	9442.27	18.8009	18.3337	18
chr5	41918371	41918418	chr5.41918371	108.475	.	9441.74	26.91	25.7963	31
chrX	153950460	153950486	chrX.153950460	108.343	.	9430.18	14.3944	14.1796	22
chr8	144517064	144517103	chr8.144517064	108.035	.	9403.38	22.1338	21.453	1
chr2	74527512	74527561	chr2.74527512	107.747	.	9378.38	28.1051	26.8228	16
chr11	74034023	74034091	chr11.74034023	107.653	.	9370.15	23.0827	22.3174	66
chr11	85664115	85664163	chr11.85664115	107.504	.	9357.18	27.5075	26.3196	4
chr10	102376390	102376416	chr10.102376390	107.464	.	9353.72	14.3944	14.1796	3
chr15	74629857	74629899	chr15.74629857	107.415	.	9349.45	23.924	23.0951	26
chr5	179836666	179836692	chr5b.95836666	107.387	.	9347.03	14.3944	14.1796	7
chr6	73518346	73518391	chr6.73518346	107.382	.	9346.63	25.7153	24.7338	44
chr8	130112149	130112183	chr8.130112149	107.365	.	9345.14	19.1531	18.6739	6
chr16	4609587	4609683	chr16.4609587	107.335	.	9342.53	32.2795	30.6815	73
chr12	113387797	113387860	chr12.113387797	107.325	.	9341.64	21.437	20.8046	10
chr1	11128065	11128122	chr1.11128065	107.318	.	9341.03	19.4603	18.9551	52
chr15	90910264	90910307	chr15.90910264	107.184	.	9329.36	24.521	23.6379	6
chr17	2060905	2060984	chr17.2060905	107.167	.	9327.88	26.699	25.5962	63
chr5	176527389	176527433	chr5b.92527389	107.054	.	9318.08	25.1181	24.192	19
chrX	40062776	40062815	chrX.40062776	106.973	.	9310.98	22.1338	21.453	12
chrX	150470676	150470758	chrX.150470676	106.948	.	9308.85	27.6845	26.4335	14
chr1	39562131	39562219	chr1.39562131	106.864	.	9301.52	29.6544	28.1945	68
chr2	219224668	219224704	chr2b.125224668	106.799	.	9295.9	20.3449	19.7906	12
chr7	130398117	130398159	chr7.130398117	106.758	.	9292.27	23.924	23.0951	12
chr20	26208407	26208435	chr20.26208407	106.403	.	9261.43	15.5826	15.3205	14
chr12	120212080	120212107	chr12.120212080	106.289	.	9251.45	14.9883	14.7519	0
chr12	56226196	56226257	chr12.56226196	106.209	.	9244.54	20.7784	20.1915	36
chr5	139026878	139026914	chr5b.55026878	106.087	.	9233.9	12.5168	12.3598	22
chr21	33552740	33552779	chr21.33552740	106.058	.	9231.39	22.1338	21.453	19
chr11	134178696	134178729	chr11.134178696	106.008	.	9227.05	18.5575	18.1145	0
chr2	69245430	69245461	chr2.69245430	105.866	.	9214.66	17.3668	17.0077	22
chr20	37983380	37983440	chr20.37983380	105.863	.	9214.41	20.449	19.8681	4
chr7	76054856	76054891	chr7.76054856	105.858	.	9214.01	19.7489	19.2358	24
chr22	29769750	29769774	chr22.29769750	105.84	.	9212.4	13.2075	13.0332	2
chr3	128071001	128071062	chr3b.37071001	105.825	.	9211.13	20.7784	20.1915	50
chr12	56615422	56615491	chr12.56615422	105.756	.	9205.11	23.4117	22.5974	48
chr1	151176595	151176643	chr1b.26176595	105.753	.	9204.89	27.5075	26.3196	16
chr20	44942993	44943030	chr20.44942993	105.621	.	9193.4	20.941	20.3472	0
chr7	100430666	100430701	chr7.100430666	105.546	.	9186.79	19.7489	19.2358	4
chr1	228098250	228098294	chr1b.103098250	105.533	.	9185.69	25.1181	24.192	32
chr6	43161166	43161202	chr6.43161166	105.507	.	9183.48	20.3449	19.7906	33
chr1	236025958	236025997	chr1b.111025958	105.504	.	9183.15	22.1338	21.453	23
chr1	158095272	158095307	chr1b.33095272	105.401	.	9174.21	19.7489	19.2358	1
chr3	125013041	125013082	chr3b.34013041	105.38	.	9172.34	23.3271	22.556	36
chr9	137192008	137192047	chr9.137192008	105.245	.	9160.63	22.1338	21.453	18
chr7	143382619	143382673	chr7.143382619	105.24	.	9160.24	18.471	18.0359	24
chr6	154733722	154733752	chr6b.69733722	104.94	.	9134.1	16.7718	16.4537	8
chr1	16396795	16396897	chr1.16396795	104.808	.	9122.6	34.2472	32.5567	12
chr11	61416129	61416213	chr11.61416129	104.471	.	9093.25	28.3412	26.9698	21
chr16	2761591	2761637	chr16.2761591	104.352	.	9082.94	26.3126	25.2761	19
chr5	177489474	177489530	chr5b.93489474	104.324	.	9080.5	19.1306	18.6581	19
chr3	172633700	172633741	chr3b.81633700	104.322	.	9080.33	23.3271	22.556	16
chr11	119336407	119336439	chr11.119336407	104.134	.	9063.94	17.962	17.5628	10
chr22	24542467	24542544	chr22.24542467	104.009	.	9053.09	26.0419	25.0162	60
chr17	82585986	82586020	chr17.82585986	103.923	.	9045.62	19.1531	18.6739	0
chr11	62789069	62789113	chr11.62789069	103.877	.	9041.57	25.1181	24.192	21
chr22	20953231	20953253	chr22.20953231	103.681	.	9024.53	12.022	11.8776	13
chr5	115842001	115842019	chr5b.31842001	103.619	.	9019.14	9.65682	9.56252	4
chr11	67498178	67498227	chr11.67498178	103.581	.	9015.81	28.1051	26.8228	48
chr7	44061056	44061104	chr7.44061056	103.575	.	9015.36	27.5075	26.3196	44
chr14	95533458	95533485	chr14.95533458	103.573	.	9015.17	14.9883	14.7519	3
chr5	126777406	126777436	chr5b.42777406	103.543	.	9012.5	16.7718	16.4537	11
chr9	137272835	137272873	chr9.137272835	103.388	.	8999.02	21.5374	20.899	35
chr5	179775809	179775845	chr5b.95775809	103.3	.	8991.41	20.3449	19.7906	0
chr7	44056859	44056896	chr7.44056859	103.267	.	8988.48	20.941	20.3472	9
chr5	886282	886320	chr5.886282	103.125	.	8976.18	21.5374	20.899	6
chr1	244862634	244862677	chr1b.119862634	103.113	.	8975.09	24.521	23.6379	37
chr22	36480706	36480753	chr22.36480706	103.082	.	8972.42	26.91	25.7963	30
chr9	129095008	129095040	chr9.129095008	103.006	.	8965.82	17.962	17.5628	13
chr5	177492541	177492582	chr5b.93492541	102.941	.	8960.14	23.3271	22.556	4
chr15	74631678	74631708	chr15.74631678	102.934	.	8959.58	16.7718	16.4537	0
chr19	2755178	2755261	chr19.2755178	102.652	.	8935.02	28.0129	26.739	69
chr3	47405941	47405986	chr3.47405941	102.58	.	8928.78	25.7153	24.7338	39
chr10	62091147	62091191	chr10.62091147	102.516	.	8923.21	15.1681	14.9101	17
chr9	33469548	33469603	chr9.33469548	102.509	.	8922.55	18.8009	18.3337	14
chr1	43591873	43591924	chr1.43591873	102.491	.	8920.97	17.481	17.098	1
chr5	141516035	141516096	chr5b.57516035	102.407	.	8913.67	20.7784	20.1915	12
chr5	73447754	73447783	chr5.73447754	102.401	.	8913.18	16.1771	15.8883	28
chr7	100089308	100089361	chr7.100089308	102.342	.	8908.01	18.1411	17.7133	41
chr1	8878605	8878642	chr1.8878605	102.276	.	8902.31	20.941	20.3472	22
chr1	33324031	33324112	chr1.33324031	102.272	.	8901.92	27.356	26.1802	11
chr2	150486010	150486043	chr2b.56486010	101.96	.	8874.8	18.5575	18.1145	9
chr9	107306505	107306539	chr9.107306505	101.923	.	8871.53	19.1531	18.6739	11
chrX	56564789	56564823	chrX.56564789	101.875	.	8867.4	19.1531	18.6739	9
chr8	22575241	22575279	chr8.22575241	101.863	.	8866.33	21.5374	20.899	8
chr7	2664105	2664151	chr7.2664105	101.853	.	8865.45	26.3126	25.2761	41
chr10	80520547	80520601	chr10.80520547	101.693	.	8851.55	18.471	18.0359	42
chr6	52500358	52500386	chr6.52500358	101.684	.	8850.79	15.5826	15.3205	8
chr1	30871619	30871649	chr1.30871619	101.614	.	8844.69	16.7718	16.4537	26
chr1	151286801	151286898	chr1b.26286801	101.554	.	8839.45	32.6075	30.9974	23
chr1	153939613	153939652	chr1b.28939613	101.418	.	8827.65	22.1338	21.453	33
chr5	154419536	154419575	chr5b.70419536	101.355	.	8822.15	22.1338	21.453	0
chr5	58459954	58459991	chr5.58459954	101.326	.	8819.59	20.941	20.3472	0
chr19	48391321	48391395	chr19.48391321	101.323	.	8819.31	25.0559	24.1369	2
chr7	149011925	149011998	chr7.149011925	101.299	.	8817.28	24.7271	23.814	63
chr1	244056706	244056771	chr1b.119056706	101.271	.	8814.8	22.0955	21.4202	52
chr15	77114041	77114080	chr15.77114041	101.228	.	8811.07	22.1338	21.453	26
chr12	132816686	132816725	chr12.132816686	101.219	.	8810.31	22.1338	21.453	35
chr5	154814446	154814479	chr5b.70814446	101.066	.	8796.99	18.5575	18.1145	22
chr12	6766433	6766476	chr12.6766433	101.048	.	8795.42	14.837	14.603	12
chr7	100689447	100689493	chr7.100689447	100.918	.	8784.11	26.3126	25.2761	9
chr12	47842082	47842121	chr12.47842082	100.904	.	8782.87	22.1338	21.453	28
chr5	140333193	140333235	chr5b.56333193	100.814	.	8775.09	23.924	23.0951	4
chr11	65890473	65890522	chr11.65890473	100.681	.	8763.51	28.1051	26.8228	26
chr12	53100789	53100815	chr12.53100789	100.335	.	8733.4	14.3944	14.1796	0
chr6	36686438	36686495	chr6.36686438	100.076	.	8710.87	19.4603	18.9551	20
chr14	73715821	73715867	chr14.73715821	99.9937	.	8703.68	26.3126	25.2761	7
chr12	6938593	6938620	chr12.6938593	99.9503	.	8699.9	14.9883	14.7519	22
chr20	3801026	3801070	chr20.3801026	99.9242	.	8697.63	25.1181	24.192	19
chr11	126263661	126263719	chr11.126263661	99.8491	.	8691.1	19.7899	19.2491	19
chr5	69189618	69189670	chr5.69189618	99.6212	.	8671.27	17.8112	17.4199	23
chr21	43691469	43691501	chr21.43691469	99.5769	.	8667.41	17.962	17.5628	16
chr16	30710089	30710127	chr16.30710089	99.5292	.	8663.26	21.5374	20.899	14
chr14	22841533	22841564	chr14.22841533	99.44	.	8655.5	17.3668	17.0077	28
chr11	119044638	119044722	chr11.119044638	99.4359	.	8655.15	28.3412	26.9698	69
chr10	94254923	94254952	chr10.94254923	99.3921	.	8651.33	16.1771	15.8883	3
chr7	128654507	128654542	chr7.128654507	99.3784	.	8650.14	19.7489	19.2358	21
chr12	49050432	49050490	chr12.49050432	99.2592	.	8639.76	19.7899	19.2491	0
chr1	26855403	26855434	chr1.26855403	99.256	.	8639.49	17.3668	17.0077	17
chr7	139596781	139596819	chr7.139596781	99.2394	.	8638.04	21.5374	20.899	11
chr19	10391457	10391550	chr19.10391457	99.221	.	8636.45	31.2953	29.7668	47
chrX	153957339	153957374	chrX.153957339	99.1784	.	8632.73	19.7489	19.2358	32
chr16	400405	400479	chr16.400405	99.1701	.	8632.01	25.0559	24.1369	19
chr6	111661623	111661649	chr6b.26661623	99.0479	.	8621.38	14.3944	14.1796	0
chr2	85609461	85609501	chr2.85609461	98.9729	.	8614.85	13.8436	13.6336	32
chr20	64063579	64063636	chr20.64063579	98.8869	.	8607.37	19.4603	18.9551	6
chr3	114351148	114351180	chr3b.23351148	98.871	.	8605.99	17.962	17.5628	11
chr16	70664339	70664388	chr16.70664339	98.8435	.	8603.6	28.1051	26.8228	18
chr4	27017839	27017868	chr4.27017839	98.6735	.	8588.8	16.1771	15.8883	21
chr2	46382441	46382491	chr2.46382441	98.6651	.	8588.07	17.1508	16.8005	31
chr2	27034163	27034202	chr2.27034163	98.6586	.	8587.5	22.1338	21.453	20
chr10	14588527	14588568	chr10.14588527	98.6453	.	8586.34	23.3271	22.556	17
chr5	173318927	173318977	chr5b.89318927	98.6309	.	8585.09	17.1508	16.8005	37
chrX	153949098	153949134	chrX.153949098	98.617	.	8583.88	20.3449	19.7906	31
chrX	47195790	47195824	chrX.47195790	98.5202	.	8575.46	19.1531	18.6739	26
chr17	80343200	80343258	chr17.80343200	98.3609	.	8561.6	19.7899	19.2491	32
chr15	64684376	64684422	chr15.64684376	98.0547	.	8534.96	15.8294	15.5448	41
chr16	30069851	30069867	chr16.30069851	97.9186	.	8523.11	8.4779	8.39773	15
chr1	156548094	156548172	chr1b.31548094	97.8759	.	8519.4	26.3705	25.2826	57
chr10	68174262	68174293	chr10.68174262	97.8369	.	8516	17.3668	17.0077	29
chr22	37941701	37941787	chr22.37941701	97.7988	.	8512.68	28.9979	27.5832	9
chr22	29273770	29273799	chr22.29273770	97.6854	.	8502.82	16.1771	15.8883	25
chr2	188987119	188987152	chr2b.94987119	97.6174	.	8496.9	18.5575	18.1145	4
chr17	39729226	39729280	chr17.39729226	97.4236	.	8480.04	18.471	18.0359	24
chrX	153867372	153867414	chrX.153867372	97.3324	.	8472.1	23.924	23.0951	0
chr1	228098009	228098036	chr1b.103098009	97.3276	.	8471.69	14.9883	14.7519	10
chr14	74809681	74809731	chr14.74809681	97.3183	.	8470.88	17.1508	16.8005	6
chr9	114402194	114402235	chr9.114402194	97.1787	.	8458.73	23.3271	22.556	27
chr3	134371006	134371039	chr3b.43371006	97.1524	.	8456.44	18.5575	18.1145	11
chr8	37698488	37698525	chr8.37698488	97.145	.	8455.79	20.941	20.3472	3
chrX	154355681	154355719	chrX.154355681	97.0679	.	8449.09	21.5374	20.899	20
chr2	231708665	231708691	chr2b.137708665	96.9821	.	8441.62	14.3944	14.1796	22
chr15	74033253	74033320	chr15.74033253	96.941	.	8438.05	22.7537	22.0076	20
chr3	133617153	133617195	chr3b.42617153	96.6156	.	8409.73	23.924	23.0951	25
chr1	116404453	116404489	chr1.116404453	96.5394	.	8403.09	12.5164	12.3598	26
chr12	49040573	49040618	chr12.49040573	96.4687	.	8396.95	25.7153	24.7338	12
chr22	41177311	41177373	chr22.41177311	96.1471	.	8368.96	21.1077	20.4836	17
chr15	74449300	74449336	chr15.74449300	96.1094	.	8365.68	20.3449	19.7906	14
chr12	52897381	52897431	chr12.52897381	96.0395	.	8359.6	17.1508	16.8005	23
chr17	76949991	76950130	chr17.76949991	95.996	.	8355.81	46.3671	44.0621	105
chr8	26656578	26656602	chr8.26656578	95.9721	.	8353.73	13.2075	13.0332	14
chr8	116850746	116850800	chr8.116850746	95.8357	.	8341.87	18.471	18.0359	11
chr20	2462724	2462765	chr20.2462724	95.8304	.	8341.4	23.3271	22.556	15
chr8	143992252	143992300	chr8.143992252	95.7104	.	8330.96	27.5075	26.3196	40
chr1	2303330	2303380	chr1.2303330	95.6635	.	8326.88	17.1508	16.8005	24
chr10	102159445	102159481	chr10.102159445	95.5819	.	8319.78	20.3449	19.7906	31
chr1	32772177	32772222	chr1.32772177	95.5683	.	8318.6	25.7153	24.7338	16
chr8	143440968	143441031	chr8.143440968	95.2274	.	8288.93	21.437	20.8046	24
chrX	53538863	53538885	chrX.53538863	95.1763	.	8284.49	12.022	11.8776	21
chr14	24123264	24123295	chr14.24123264	95.1265	.	8280.15	17.3668	17.0077	17
chrX	154019093	154019123	chrX.154019093	95.0722	.	8275.42	16.7718	16.4537	0
chr7	137879971	137880025	chr7.137879971	95.0546	.	8273.9	18.471	18.0359	28
chr14	22875103	22875149	chr14.22875103	94.9304	.	8263.08	26.3126	25.2761	37
chr17	7417141	7417271	chr17.7417141	94.8592	.	8256.89	43.4209	41.3149	56
chr7	6024022	6024058	chr7.6024022	94.7643	.	8248.63	20.3449	19.7906	20
chr2	148468910	148468947	chr2b.54468910	94.6576	.	8239.35	12.8487	12.677	18
chrX	154535219	154535242	chrX.154535219	94.5491	.	8229.91	12.6146	12.456	0
chr3	47413010	47413068	chr3.47413010	94.5255	.	8227.85	19.7899	19.2491	14
chr9	137255531	137255598	chr9.137255531	94.5172	.	8227.13	22.7537	22.0076	35
chr14	24150074	24150121	chr14.24150074	94.4602	.	8222.17	26.91	25.7963	34
chr7	139716750	139716789	chr7.139716750	94.3801	.	8215.2	22.1338	21.453	33
chr7	150373161	150373205	chr7.150373161	94.3081	.	8208.93	25.1181	24.192	30
chr3	186081059	186081101	chr3b.95081059	94.2467	.	8203.6	23.924	23.0951	0
chr2	97756956	97756986	chr2b.3756956	94.2136	.	8200.71	16.7718	16.4537	0
chr1	156239860	156239900	chr1b.31239860	94.1534	.	8195.47	22.7304	22.0076	7
chr2	215371995	215372026	chr2b.121371995	93.8475	.	8168.85	17.3668	17.0077	0
chr2	25742414	25742444	chr2.25742414	93.8219	.	8166.63	16.7718	16.4537	6
chr22	37569268	37569311	chr22.37569268	93.792	.	8164.03	24.521	23.6379	24
chr11	64803906	64803972	chr11.64803906	93.7599	.	8161.23	22.4246	21.7075	33
chr22	17818801	17818883	chr22.17818801	93.7042	.	8156.39	27.6845	26.4335	75
chr20	63931654	63931693	chr20.63931654	93.6857	.	8154.78	22.1338	21.453	30
chr22	31089914	31089974	chr22.31089914	93.5964	.	8147.01	20.449	19.8681	11
chr12	56612100	56612142	chr12.56612100	93.5592	.	8143.76	23.924	23.0951	26
chr9	128552604	128552646	chr9.128552604	93.535	.	8141.66	23.924	23.0951	0
chr5	73447277	73447305	chr5.73447277	93.4588	.	8135.03	15.5826	15.3205	10
chr3	49125850	49125890	chr3.49125850	93.4472	.	8134.02	13.8433	13.6336	23
chr3	111072581	111072637	chr3b.20072581	93.438	.	8133.22	19.1306	18.6581	24
chr5	177433575	177433652	chr5b.93433575	93.3646	.	8126.83	26.0419	25.0162	12
chr10	101584765	101584818	chr10.101584765	93.2704	.	8118.64	18.1411	17.7133	27
chr5	139341901	139341928	chr5b.55341901	93.2021	.	8112.7	14.9883	14.7519	0
chr7	44383777	44383798	chr7.44383777	92.9488	.	8090.66	11.43	11.2996	15
chr14	73739087	73739135	chr14.73739087	92.8278	.	8080.12	27.5075	26.3196	0
chr10	104312503	104312541	chr10.104312503	92.8223	.	8079.65	21.5374	20.899	11
chr11	66333276	66333355	chr11.66333276	92.7459	.	8073	26.699	25.5962	55
chr5	178149690	178149755	chr5b.94149690	92.7444	.	8072.87	22.0955	21.4202	27
chr9	129148039	129148072	chr9.129148039	92.7258	.	8071.24	18.5575	18.1145	31
chr1	24653009	24653069	chr1.24653009	92.7071	.	8069.62	20.449	19.8681	19
chr21	44318517	44318580	chr21.44318517	92.6612	.	8065.63	21.437	20.8046	38
chr8	144523943	144523989	chr8.144523943	92.6483	.	8064.5	26.3126	25.2761	10
chr3	99795251	99795285	chr3b.8795251	92.4365	.	8046.07	19.1531	18.6739	7
chr12	124342001	124342036	chr12.124342001	92.3429	.	8037.93	19.7489	19.2358	9
chr9	137215142	137215164	chr9.137215142	92.2705	.	8031.63	12.022	11.8776	4
chr7	44058181	44058222	chr7.44058181	92.2601	.	8030.72	23.3271	22.556	18
chr11	126264426	126264515	chr11.126264426	92.0522	.	8012.64	29.9827	28.5066	47
chr6	143941911	143941938	chr6b.58941911	92.0444	.	8011.96	14.9883	14.7519	7
chr2	120970443	120970484	chr2b.26970443	92.0277	.	8010.5	23.3271	22.556	36
chr16	70674322	70674361	chr16.70674322	91.9713	.	8005.6	22.1338	21.453	35
chr12	6940908	6940943	chr12.6940908	91.9237	.	8001.45	19.7489	19.2358	25
chr14	22842634	22842663	chr14.22842634	91.8833	.	7997.94	16.1771	15.8883	0
chrX	153953755	153953790	chrX.153953755	91.882	.	7997.82	19.7489	19.2358	10
chr2	111883972	111884010	chr2b.17883972	91.7597	.	7987.18	21.5374	20.899	2
chr12	52286071	52286142	chr12.52286071	91.6234	.	7975.32	24.0695	23.1988	17
chr17	42404335	42404382	chr17.42404335	91.5822	.	7971.74	26.91	25.7963	3
chr20	38090828	38090878	chr20.38090828	91.4979	.	7964.4	17.1508	16.8005	9
chr7	2730439	2730490	chr7.2730439	91.4943	.	7964.08	17.481	17.098	0
chr11	64765420	64765457	chr11.64765420	91.397	.	7955.62	20.941	20.3472	19
chr7	130900956	130901029	chr7.130900956	91.3367	.	7950.37	24.7271	23.814	45
chr6	158501886	158501915	chr6b.73501886	91.2455	.	7942.44	16.1771	15.8883	10
chr9	35555138	35555178	chr9.35555138	91.1458	.	7933.76	22.7304	22.0076	27
chr2	27053941	27053976	chr2.27053941	91.0002	.	7921.09	19.7489	19.2358	12
chr20	36461851	36461948	chr20.36461851	90.9759	.	7918.97	32.6075	30.9974	43
chr11	46320858	46320915	chr11.46320858	90.973	.	7918.72	19.4603	18.9551	41
chr20	50192363	50192394	chr20.50192363	90.9716	.	7918.6	17.3668	17.0077	10
chr7	139583872	139583895	chr7.139583872	90.9613	.	7917.71	12.6146	12.456	9
chr9	15510165	15510207	chr9.15510165	90.9499	.	7916.71	23.924	23.0951	6
chr4	866399	866455	chr4.866399	90.9273	.	7914.74	19.1306	18.6581	12
chr1	11974904	11974979	chr1.11974904	90.8665	.	7909.46	25.3846	24.4178	37
chr17	28700989	28701054	chr17.28700989	90.8549	.	7908.45	22.0955	21.4202	61
chr8	37699432	37699464	chr8.37699432	90.816	.	7905.06	17.962	17.5628	17
chr17	8467037	8467093	chr17.8467037	90.7518	.	7899.47	19.1308	18.6581	26
chr17	78853837	78853876	chr17.78853837	90.645	.	7890.19	22.1338	21.453	16
chrX	53614591	53614621	chrX.53614591	90.6375	.	7889.53	16.7718	16.4537	26
chr3	127678347	127678421	chr3b.36678347	90.6024	.	7886.47	28.5028	27.1047	21
chr4	118815135	118815180	chr4b.34815135	90.5951	.	7885.84	25.7153	24.7338	16
chr12	56688039	56688105	chr12.56688039	90.5924	.	7885.61	22.4246	21.7075	12
chr11	62726738	62726781	chr11.62726738	90.5659	.	7883.3	24.521	23.6379	0
chr14	65076064	65076094	chr14.65076064	90.4544	.	7873.59	16.7718	16.4537	1
chr7	102201440	102201524	chr7.102201440	90.4294	.	7871.42	28.3413	26.9698	61
chr1	214551428	214551457	chr1b.89551428	90.4086	.	7869.61	16.1771	15.8883	10
chr11	1753402	1753438	chr11.1753402	90.3965	.	7868.55	20.3449	19.7906	0
chr15	96336061	96336095	chr15.96336061	90.3649	.	7865.8	19.1531	18.6739	1
chr8	42175707	42175734	chr8.42175707	90.3641	.	7865.73	14.9883	14.7519	9
chr5	177490904	177490932	chr5b.93490904	90.3565	.	7865.08	15.5826	15.3205	0
chr3	28241706	28241738	chr3.28241706	90.3501	.	7864.52	17.962	17.5628	13
chr3	184167913	184167971	chr3b.93167913	90.1537	.	7847.43	19.7899	19.2491	9
chr5	177433349	177433394	chr5b.93433349	90.1346	.	7845.77	25.7153	24.7338	43
chr16	1964299	1964345	chr16.1964299	90.0294	.	7836.62	26.3126	25.2761	13
chr14	22981318	22981363	chr14.22981318	89.8632	.	7822.15	25.7153	24.7338	10
chr12	56272002	56272053	chr12.56272002	89.5977	.	7799.05	17.481	17.098	5
chr2	152619622	152619663	chr2b.58619622	89.5807	.	7797.57	23.3271	22.556	12
chr11	46377403	46377508	chr11.46377403	89.5125	.	7791.63	35.2308	33.4964	30
chr1	201783437	201783473	chr1b.76783437	89.4436	.	7785.64	12.5164	12.3598	20
chr1	32771559	32771593	chr1.32771559	89.2775	.	7771.18	19.1531	18.6739	2
chr22	38862163	38862194	chr22.38862163	89.0166	.	7748.48	17.3668	17.0077	27
chr19	48874770	48874810	chr19.48874770	88.9882	.	7746.01	22.7304	22.0076	9
chr1	43619706	43619769	chr1.43619706	88.9311	.	7741.04	21.437	20.8046	22
chrX	41347792	41347831	chrX.41347792	88.9161	.	7739.74	22.1338	21.453	29
chr19	53874252	53874345	chr19.53874252	88.7479	.	7725.1	31.2953	29.7668	38
chr5	150545359	150545385	chr5b.66545359	88.6773	.	7718.96	14.3944	14.1796	25
chr1	43622089	43622137	chr1.43622089	88.6261	.	7714.5	27.5075	26.3196	32
chr14	22981565	22981602	chr14.22981565	88.5908	.	7711.43	20.941	20.3472	36
chrX	49029442	49029462	chrX.49029442	88.5564	.	7708.43	10.8384	10.7226	2
chr2	215372308	215372338	chr2b.121372308	88.5148	.	7704.82	10.5203	10.4078	26
chr21	45225252	45225284	chr21.45225252	88.5002	.	7703.55	17.962	17.5628	23
chr2	232333924	232333965	chr2b.138333924	88.4921	.	7702.85	23.3271	22.556	9
chr2	28393261	28393293	chr2.28393261	88.4541	.	7699.53	17.962	17.5628	9
chr19	15244263	15244345	chr19.15244263	88.3794	.	7693.04	27.6845	26.4335	41
chr9	120456172	120456231	chr9.120456172	88.1889	.	7676.46	22.8679	22.103	31
chr10	95290844	95290872	chr10.95290844	88.1627	.	7674.18	15.5826	15.3205	27
chr8	41309302	41309324	chr8.41309302	88.1447	.	7672.61	12.022	11.8776	9
chr13	112883164	112883207	chr13.112883164	88.1	.	7668.72	16.8397	16.4896	2
chr11	67285646	67285710	chr11.67285646	88.0072	.	7660.64	21.7663	21.0971	57
chr20	33675745	33675775	chr20.33675745	87.8726	.	7648.93	16.7718	16.4537	6
chr20	45420559	45420627	chr20.45420559	87.8663	.	7648.39	23.0827	22.3174	18
chr10	814959	814988	chr10.814959	87.8575	.	7647.62	16.1771	15.8883	26
chr20	35557518	35557595	chr20.35557518	87.7023	.	7634.11	26.0419	25.0162	35
chr2	54987578	54987626	chr2.54987578	87.6558	.	7630.07	27.5075	26.3196	2
chr1	204411328	204411362	chr1b.79411328	87.6307	.	7627.88	19.1531	18.6739	0
chr22	25459527	25459574	chr22.25459527	87.593	.	7624.6	26.91	25.7963	14
chrX	153954403	153954436	chrX.153954403	87.5765	.	7623.17	18.5575	18.1145	30
chr2	46382063	46382108	chr2.46382063	87.5327	.	7619.36	25.7153	24.7338	23
chr8	143933210	143933251	chr8.143933210	87.4938	.	7615.97	23.3271	22.556	38
chr2	219539307	219539351	chr2b.125539307	87.4931	.	7615.91	15.1679	14.9101	8
chr17	3812766	3812805	chr17.3812766	87.4828	.	7615.02	22.1338	21.453	10
chr1	50970352	50970409	chr1.50970352	87.457	.	7612.77	19.4603	18.9551	47
chr9	131447149	131447219	chr9.131447149	87.2844	.	7597.75	23.7406	22.9177	34
chr16	2899116	2899208	chr16.2899116	87.162	.	7587.1	30.9672	29.4536	43
chrX	47211589	47211623	chrX.47211589	87.1497	.	7586.03	19.1531	18.6739	9
chr12	132044823	132044863	chr12.132044823	87.0147	.	7574.28	22.7304	22.0076	31
chr10	68166372	68166406	chr10.68166372	87.0135	.	7574.17	19.1531	18.6739	0
chr1	153933524	153933573	chr1b.28933524	87.0031	.	7573.27	28.1051	26.8228	8
chr11	64766932	64766970	chr11.64766932	86.9482	.	7568.49	21.5374	20.899	6
chr12	111456130	111456178	chr12.111456130	86.8649	.	7561.25	27.5075	26.3196	35
chr10	80155632	80155669	chr10.80155632	86.8448	.	7559.5	20.941	20.3472	22
chr9	121784255	121784337	chr9.121784255	86.6008	.	7538.26	27.6845	26.4335	40
chr1	25816518	25816574	chr1.25816518	86.599	.	7538.1	19.1306	18.6581	36
chrX	154364529	154364581	chrX.154364529	86.2885	.	7511.09	17.8111	17.4199	46
chr7	102283592	102283634	chr7.102283592	86.18	.	7501.64	23.924	23.0951	20
chr7	128652157	128652192	chr7.128652157	86.1275	.	7497.08	19.7489	19.2358	14
chr9	128820400	128820446	chr9.128820400	86.06	.	7491.21	26.3126	25.2761	34
chr1	16397631	16397684	chr1.16397631	86.0089	.	7486.76	18.1411	17.7133	50
chr17	42422781	42422830	chr17.42422781	85.9442	.	7481.13	28.1051	26.8228	10
chr3	184314603	184314643	chr3b.93314603	85.7646	.	7465.5	22.7304	22.0076	17
chrX	153954519	153954552	chrX.153954519	85.7542	.	7464.6	18.5575	18.1145	7
chr12	49050264	49050291	chr12.49050264	85.711	.	7460.84	14.9883	14.7519	21
chr12	124400547	124400587	chr12.124400547	85.7107	.	7460.81	22.7304	22.0076	11
chr16	31109082	31109147	chr16.31109082	85.6821	.	7458.32	22.0955	21.4202	41
chr5	180790718	180790770	chr5b.96790718	85.6806	.	7458.19	17.8111	17.4199	8
chr8	41265044	41265082	chr8.41265044	85.5791	.	7449.36	21.5374	20.899	11
chr6	18264429	18264465	chr6.18264429	85.4834	.	7441.03	20.3449	19.7906	3
chr16	79523	79570	chr16.79523	85.4721	.	7440.04	26.91	25.7963	34
chr9	128107835	128107892	chr9.128107835	85.427	.	7436.12	19.4603	18.9551	9
chr9	123381027	123381061	chr9.123381027	85.411	.	7434.73	19.1531	18.6739	26
chrX	48561111	48561140	chrX.48561111	85.3704	.	7431.2	16.1771	15.8883	25
chr16	30664774	30664852	chr16.30664774	85.3423	.	7428.75	26.3705	25.2826	0
chr3	50257684	50257712	chr3.50257684	85.3243	.	7427.19	15.5826	15.3205	0
chr2	130157278	130157307	chr2b.36157278	85.3199	.	7426.8	16.1771	15.8883	10
chr9	83971914	83971952	chr9.83971914	85.2425	.	7420.07	21.5374	20.899	23
chrX	74214689	74214735	chrX.74214689	85.2238	.	7418.45	15.8294	15.5448	25
chr3	51969042	51969108	chr3.51969042	85.1054	.	7408.14	22.4246	21.7075	38
chr11	67497549	67497595	chr11.67497549	85.0206	.	7400.76	26.3126	25.2761	6
chr3	58137501	58137553	chr3.58137501	84.9848	.	7397.65	17.8111	17.4199	45
chr2	46384655	46384711	chr2.46384655	84.873	.	7387.91	19.1306	18.6581	28
chr19	44903086	44903160	chr19.44903086	84.8495	.	7385.87	25.0559	24.1369	1
chr20	43702822	43702847	chr20.43702822	84.8165	.	7383	13.8008	13.6092	3
chr6	43132445	43132493	chr6.43132445	84.8124	.	7382.64	27.5075	26.3196	19
chr17	82078689	82078784	chr17.82078689	84.7983	.	7381.42	31.9514	30.3785	30
chrX	48560666	48560713	chrX.48560666	84.701	.	7372.95	16.1601	15.873	3
chr3	9838041	9838081	chr3.9838041	84.6688	.	7370.15	22.7304	22.0076	19
chr19	13778171	13778248	chr19.13778171	84.6225	.	7366.12	26.0419	25.0162	44
chr14	68790471	68790510	chr14.68790471	84.5945	.	7363.68	22.1338	21.453	3
chr11	65650650	65650765	chr11.65650650	84.5638	.	7361.01	38.5081	36.5949	72
chr16	89290741	89290819	chr16.89290741	84.554	.	7360.16	26.3705	25.2826	56
chr12	55728290	55728321	chr12.55728290	84.5452	.	7359.39	17.3668	17.0077	30
chr6	156779124	156779150	chr6b.71779124	84.532	.	7358.24	14.3944	14.1796	23
chr9	136728063	136728103	chr9.136728063	84.4867	.	7354.3	22.7304	22.0076	31
chr5	179774498	179774529	chr5b.95774498	84.4053	.	7347.22	17.3668	17.0077	18
chr7	106284846	106284885	chr7.106284846	84.2211	.	7331.19	22.1338	21.453	29
chr1	46248117	46248193	chr1.46248117	84.1618	.	7326.03	25.7132	24.7338	68
chrX	47186350	47186403	chrX.47186350	84.132	.	7323.44	18.1411	17.7133	4
chr14	102507341	102507421	chr14.102507341	84.1291	.	7323.18	27.0275	25.8665	36
chr5	142152544	142152584	chr5b.58152544	84.1107	.	7321.59	13.8433	13.6336	27
chrX	154359025	154359047	chrX.154359025	84.0994	.	7320.6	12.022	11.8776	19
chr19	16234503	16234591	chr19.16234503	84.066	.	7317.69	29.6544	28.1945	52
chr21	37202302	37202327	chr21.37202302	84.0589	.	7317.08	13.8008	13.6092	23
chr8	144529728	144529760	chr8.144529728	84.0543	.	7316.67	17.962	17.5628	6
chr17	29574526	29574662	chr17.29574526	84.0059	.	7312.47	45.3852	43.1871	66
chr1	15429031	15429084	chr1.15429031	83.9755	.	7309.82	18.1411	17.7133	39
chr20	34743049	34743083	chr20.34743049	83.9225	.	7305.21	19.1531	18.6739	0
chr3	47408861	47408893	chr3.47408861	83.9135	.	7304.42	17.962	17.5628	7
chr10	96750675	96750719	chr10.96750675	83.8487	.	7298.79	25.1181	24.192	41
chr7	139716853	139716888	chr7.139716853	83.791	.	7293.77	19.7489	19.2358	31
chr2	96832823	96832874	chr2b.2832823	83.7616	.	7291.2	17.481	17.098	3
chr1	214383888	214383934	chr1b.89383888	83.7548	.	7290.62	26.3126	25.2761	19
chr1	203741224	203741279	chr1b.78741224	83.5523	.	7272.99	18.8009	18.3337	42
chr10	102160663	102160688	chr10.102160663	83.5269	.	7270.78	13.8008	13.6092	8
chr7	5605877	5605906	chr7.5605877	83.5198	.	7270.17	16.1771	15.8883	0
chr12	114672004	114672074	chr12.114672004	83.5054	.	7268.91	23.7406	22.9177	60
chr10	80155717	80155745	chr10.80155717	83.4324	.	7262.56	15.5826	15.3205	9
chr19	46838337	46838389	chr19.46838337	83.3814	.	7258.12	17.8111	17.4199	48
chr1	1534117	1534149	chr1.1534117	83.3799	.	7257.99	17.962	17.5628	7
chr21	32645657	32645692	chr21.32645657	83.2718	.	7248.58	19.7489	19.2358	24
chrX	154349600	154349611	chrX.154349600	83.1625	.	7239.08	5.54743	5.49091	0
chr5	77075072	77075105	chr5.77075072	83.1604	.	7238.89	18.5575	18.1145	0
chr7	44708005	44708036	chr7.44708005	83.099	.	7233.54	17.3668	17.0077	19
chr6	35427080	35427119	chr6.35427080	83.0601	.	7230.17	22.1338	21.453	11
chr11	46372103	46372136	chr11.46372103	83.0198	.	7226.66	18.5575	18.1145	10
chrX	153958619	153958636	chrX.153958619	82.9944	.	7224.44	9.067	8.98046	12
chr15	74782554	74782588	chr15.74782554	82.9428	.	7219.95	19.1531	18.6739	25
chr2	240462448	240462477	chr2b.146462448	82.8238	.	7209.6	16.1771	15.8883	1
chr3	51663109	51663163	chr3.51663109	82.8179	.	7209.09	18.471	18.0359	0
chr3	111945736	111945808	chr3b.20945736	82.8071	.	7208.15	27.7522	26.4802	16
chr6	43132066	43132126	chr6.43132066	82.7737	.	7205.24	20.449	19.8681	52
chr1	156468818	156468856	chr1b.31468818	82.7585	.	7203.92	21.5374	20.899	12
chr2	20201598	20201639	chr2.20201598	82.7399	.	7202.3	23.3271	22.556	40
chr1	153949244	153949287	chr1b.28949244	82.6567	.	7195.06	24.521	23.6379	8
chr7	100615164	100615210	chr7.100615164	82.6432	.	7193.88	26.3126	25.2761	5
chr5	177489050	177489091	chr5b.93489050	82.6424	.	7193.82	23.3271	22.556	1
chrX	21940762	21940792	chrX.21940762	82.5381	.	7184.74	16.7718	16.4537	23
chr5	138467441	138467480	chr5b.54467441	82.5039	.	7181.77	22.1338	21.453	4
chr17	77498841	77498908	chr17.77498841	82.5019	.	7181.59	22.7537	22.0076	59
chr6	35088700	35088761	chr6.35088700	82.1437	.	7150.42	20.7784	20.1915	15
chr20	31665178	31665236	chr20.31665178	81.9981	.	7137.75	19.7899	19.2491	57
chr17	78855086	78855155	chr17.78855086	81.9782	.	7136.02	23.4117	22.5974	64
chr22	30292327	30292375	chr22.30292327	81.9291	.	7131.75	27.5075	26.3196	12
chr19	47000897	47001005	chr19.47000897	81.6666	.	7108.9	36.2142	34.428	55
chr20	44901696	44901741	chr20.44901696	81.6537	.	7107.78	25.7153	24.7338	21
chr3	160399901	160399938	chr3b.69399901	81.5388	.	7097.78	20.941	20.3472	14
chr10	100237067	100237103	chr10.100237067	81.5015	.	7094.54	20.3449	19.7906	33
chr9	129147492	129147522	chr9.129147492	81.4152	.	7087.03	16.7718	16.4537	12
chr9	137457424	137457469	chr9.137457424	81.3638	.	7082.55	25.7153	24.7338	42
chr5	141573546	141573582	chr5b.57573546	81.3242	.	7079.11	20.3449	19.7906	13
chr11	119418545	119418588	chr11.119418545	81.2454	.	7072.25	24.521	23.6379	22
chr2	226796913	226796941	chr2b.132796913	81.1695	.	7065.65	15.5826	15.3205	8
chr1	8358775	8358814	chr1.8358775	81.1267	.	7061.92	22.1338	21.453	31
chr7	128841318	128841346	chr7.128841318	81.0369	.	7054.1	15.5826	15.3205	5
chr20	3796625	3796669	chr20.3796625	81.0137	.	7052.09	25.1181	24.192	19
chr9	128907404	128907423	chr9.128907404	80.9881	.	7049.86	10.2473	10.1422	3
chr5	641312	641348	chr5.641312	80.8161	.	7034.9	20.3449	19.7906	0
chr8	144434837	144434881	chr8.144434837	80.7816	.	7031.89	25.1181	24.192	18
chr7	74194831	74194864	chr7.74194831	80.699	.	7024.7	18.5575	18.1145	7
chr1	204411164	204411221	chr1b.79411164	80.6031	.	7016.36	19.4603	18.9551	39
chr17	2043173	2043225	chr17.2043173	80.5898	.	7015.2	17.8111	17.4199	11
chr2	135645431	135645455	chr2b.41645431	80.4617	.	7004.06	13.2075	13.0332	6
chr8	140524700	140524751	chr8.140524700	80.3886	.	6997.69	17.481	17.098	22
chr10	102146681	102146731	chr10.102146681	80.3802	.	6996.97	17.1508	16.8005	39
chr1	149886213	149886239	chr1b.24886213	80.3411	.	6993.56	14.3944	14.1796	20
chr15	90882585	90882648	chr15.90882585	80.2827	.	6988.48	21.437	20.8046	17
chr7	72926281	72926317	chr7.72926281	80.2625	.	6986.72	20.3449	19.7906	29
chr16	4805160	4805227	chr16.4805160	80.2372	.	6984.52	22.7537	22.0076	23
chr4	73141782	73141807	chr4.73141782	80.1405	.	6976.11	13.8008	13.6092	0
chr2	1649137	1649184	chr2.1649137	80.103	.	6972.84	26.91	25.7963	16
chrX	154778817	154778851	chrX.154778817	80.0356	.	6966.97	11.8519	11.7104	22
chr10	102160244	102160291	chr10.102160244	79.9364	.	6958.34	26.91	25.7963	38
chr5	62403301	62403352	chr5.62403301	79.8967	.	6954.89	17.481	17.098	20
chr8	144355482	144355504	chr8.144355482	79.7883	.	6945.46	12.022	11.8776	6
chr2	101859767	101859804	chr2b.7859767	79.7368	.	6940.98	20.941	20.3472	20
chr14	67783279	67783366	chr14.67783279	79.708	.	6938.47	29.3262	27.8915	6
chr12	53502036	53502097	chr12.53502036	79.6892	.	6936.84	20.7784	20.1915	30
chr5	32174188	32174228	chr5.32174188	79.4513	.	6916.13	22.7304	22.0076	8
chr5	146459220	146459262	chr5b.62459220	79.3087	.	6903.72	23.924	23.0951	34
chr16	10941626	10941674	chr16.10941626	79.2152	.	6895.59	27.5075	26.3196	45
chr14	105250181	105250219	chr14.105250181	79.1067	.	6886.15	21.5374	20.899	18
chr6	10410062	10410121	chr6.10410062	79.0523	.	6881.41	20.1195	19.5718	38
chr14	23047343	23047383	chr14.23047343	79.0007	.	6876.93	22.7304	22.0076	22
chr1	156252970	156253017	chr1b.31252970	78.9921	.	6876.17	26.91	25.7963	16
chr10	102159925	102159969	chr10.102159925	78.9867	.	6875.71	15.1679	14.9101	27
chr21	45991003	45991040	chr21.45991003	78.918	.	6869.72	20.941	20.3472	7
chr7	98933292	98933319	chr7.98933292	78.8697	.	6865.53	14.9883	14.7519	0
chr10	6840492	6840521	chr10.6840492	78.8138	.	6860.66	16.1771	15.8883	0
chr10	73760068	73760128	chr10.73760068	78.7554	.	6855.57	20.449	19.8681	55
chr4	143513578	143513598	chr4b.59513578	78.5915	.	6841.32	10.8384	10.7226	4
chr1	40422157	40422191	chr1.40422157	78.5711	.	6839.54	19.1531	18.6739	7
chrX	130013907	130013950	chrX.130013907	78.5475	.	6837.49	24.521	23.6379	2
chr3	51993989	51994014	chr3.51993989	78.5245	.	6835.49	13.8008	13.6092	22
chr11	10306066	10306096	chr11.10306066	78.466	.	6830.4	16.7718	16.4537	21
chr5	139475645	139475684	chr5b.55475645	78.3727	.	6822.28	22.1338	21.453	0
chr2	171522601	171522648	chr2b.77522601	78.2688	.	6813.23	26.91	25.7963	15
chr15	39581864	39581898	chr15.39581864	78.0618	.	6795.22	19.1531	18.6739	14
chr5	138168499	138168533	chr5b.54168499	77.9825	.	6788.32	11.8528	11.7104	26
chr11	59655574	59655613	chr11.59655574	77.9113	.	6782.13	13.5118	13.3217	5
chr6	160047325	160047356	chr6b.75047325	77.8758	.	6779.03	10.8536	10.7277	8
chr9	136840428	136840465	chr9.136840428	77.6	.	6755.04	20.941	20.3472	31
chr8	22138348	22138393	chr8.22138348	77.5965	.	6754.73	25.7153	24.7338	32
chr6	151349051	151349071	chr6b.66349051	77.5457	.	6750.32	10.8384	10.7226	18
chr3	93980244	93980291	chr3b.2980244	77.4995	.	6746.29	26.91	25.7963	26
chr19	38374806	38374901	chr19.38374806	77.4262	.	6739.92	31.9514	30.3785	43
chr14	63976607	63976649	chr14.63976607	77.4021	.	6737.82	23.924	23.0951	26
chr2	236124527	236124569	chr2b.142124527	77.4009	.	6737.71	23.924	23.0951	16
chr19	17580890	17580925	chr19.17580890	77.2324	.	6723.05	19.7489	19.2358	5
chr5	72200162	72200195	chr5.72200162	77.1624	.	6716.96	18.5575	18.1145	10
chr15	74035557	74035590	chr15.74035557	77.1327	.	6714.38	18.5575	18.1145	18
chr6	26251923	26251955	chr6.26251923	77.0929	.	6710.91	17.962	17.5628	0
chr14	104769928	104769961	chr14.104769928	76.9774	.	6700.86	18.5575	18.1145	14
chr2	151410444	151410501	chr2b.57410444	76.9646	.	6699.75	19.4603	18.9551	20
chrX	154031146	154031184	chrX.154031146	76.945	.	6698.04	21.5374	20.899	0
chr2	74461734	74461785	chr2.74461734	76.8905	.	6693.3	17.481	17.098	13
chr3	100775266	100775290	chr3b.9775266	76.7242	.	6678.83	13.2075	13.0332	0
chr12	49329191	49329229	chr12.49329191	76.6815	.	6675.12	21.5374	20.899	18
chr10	52315607	52315642	chr10.52315607	76.6767	.	6674.69	19.7489	19.2358	21
chr8	144106466	144106500	chr8.144106466	76.6339	.	6670.97	19.1531	18.6739	30
chr7	98949845	98949885	chr7.98949845	76.6294	.	6670.58	22.7304	22.0076	2
chr1	6222585	6222658	chr1.6222585	76.6243	.	6670.13	24.7271	23.814	2
chr12	121822621	121822656	chr12.121822621	76.5648	.	6664.96	19.7489	19.2358	16
chr5	177433949	177433991	chr5b.93433949	76.5145	.	6660.58	23.924	23.0951	16
chr1	26942919	26942971	chr1.26942919	76.486	.	6658.1	17.8111	17.4199	9
chr12	120096830	120096856	chr12.120096830	76.4839	.	6657.92	14.3944	14.1796	21
chr7	128844942	128844991	chr7.128844942	76.4547	.	6655.38	28.1051	26.8228	26
chr2	231460490	231460537	chr2b.137460490	76.4383	.	6653.95	26.91	25.7963	13
chr11	67286061	67286120	chr11.67286061	76.4315	.	6653.36	20.1195	19.5718	56
chr16	30892869	30892917	chr16.30892869	76.4099	.	6651.48	27.5075	26.3196	14
chr8	37698073	37698106	chr8.37698073	76.2724	.	6639.51	18.5575	18.1145	30
chr8	144526611	144526647	chr8.144526611	76.2627	.	6638.67	20.3449	19.7906	12
chr17	63420584	63420637	chr17.63420584	76.2314	.	6635.94	18.1411	17.7133	34
chr20	62308397	62308463	chr20.62308397	76.1571	.	6629.48	22.4246	21.7075	21
chr7	5530549	5530572	chr7.5530549	76.1318	.	6627.28	12.6146	12.456	1
chr20	50191303	50191345	chr20.50191303	76.1289	.	6627.03	23.924	23.0951	38
chr14	103693717	103693765	chr14.103693717	76.0713	.	6622.02	27.5075	26.3196	36
chr9	128566751	128566801	chr9.128566751	76.0599	.	6621.02	17.1508	16.8005	30
chrX	49071750	49071779	chrX.49071750	76.0579	.	6620.85	10.1867	10.0842	21
chr10	79300842	79300871	chr10.79300842	76.0522	.	6620.35	16.1771	15.8883	20
chr2	188988597	188988643	chr2b.94988597	76.0002	.	6615.83	26.3126	25.2761	2
chr1	161171787	161171817	chr1b.36171787	75.9903	.	6614.97	16.7718	16.4537	2
chr7	94663706	94663740	chr7.94663706	75.9187	.	6608.74	19.1531	18.6739	20
chr6	85449784	85449819	chr6b.449784	75.9168	.	6608.57	19.7489	19.2358	27
chr17	40356221	40356313	chr17.40356221	75.8234	.	6600.44	30.9672	29.4536	31
chr15	74802559	74802611	chr15.74802559	75.7973	.	6598.17	17.8111	17.4199	21
chr5	172951962	172952002	chr5b.88951962	75.772	.	6595.97	22.7304	22.0076	17
chr10	71750694	71750725	chr10.71750694	75.6326	.	6583.84	17.3668	17.0077	11
chr10	52314523	52314558	chr10.52314523	75.5659	.	6578.03	19.7489	19.2358	21
chr16	55505640	55505664	chr16.55505640	75.5485	.	6576.52	13.2075	13.0332	10
chr2	20203105	20203149	chr2.20203105	75.5465	.	6576.35	25.1181	24.192	24
chr10	71828905	71828927	chr10.71828905	75.5406	.	6575.83	12.022	11.8776	17
chr14	24185212	24185274	chr14.24185212	75.4643	.	6569.2	21.1077	20.4836	22
chr1	153535979	153536008	chr1b.28535979	75.2578	.	6551.22	16.1771	15.8883	19
chr5	146203685	146203722	chr5b.62203685	75.2277	.	6548.61	20.941	20.3472	31
chr16	27461250	27461317	chr16.27461250	75.177	.	6544.2	22.7537	22.0076	33
chr8	91040667	91040727	chr8.91040667	75.1489	.	6541.75	20.4494	19.8681	48
chr4	7763692	7763727	chr4.7763692	75.1405	.	6541.02	19.7489	19.2358	3
chr8	100712456	100712493	chr8.100712456	75.1225	.	6539.45	20.941	20.3472	0
chr5	177303871	177303898	chr5b.93303871	75.0553	.	6533.61	14.9883	14.7519	24
chr12	47783569	47783641	chr12.47783569	75.0394	.	6532.22	24.3983	23.5217	47
chr9	127815482	127815541	chr9.127815482	75.0336	.	6531.71	20.1195	19.5718	57
chr1	155947707	155947747	chr1b.30947707	74.976	.	6526.71	22.7304	22.0076	1
chr8	38996999	38997043	chr8.38996999	74.9469	.	6524.17	25.1181	24.192	26
chrX	71419856	71419899	chrX.71419856	74.9375	.	6523.36	24.521	23.6379	2
chr11	62566889	62566935	chr11.62566889	74.9093	.	6520.9	26.3126	25.2761	7
chr1	150159358	150159407	chr1b.25159358	74.8909	.	6519.3	28.1051	26.8228	0
chr2	24819915	24819940	chr2.24819915	74.8848	.	6518.77	13.8008	13.6092	23
chr9	114504974	114505019	chr9.114504974	74.8022	.	6511.58	25.7153	24.7338	6
chr2	215430767	215430802	chr2b.121430767	74.799	.	6511.3	19.7489	19.2358	0
chr7	100477575	100477641	chr7.100477575	74.7713	.	6508.89	22.4247	21.7075	2
chr21	44322992	44323018	chr21.44322992	74.7491	.	6506.96	14.3944	14.1796	2
chr6	2948315	2948344	chr6.2948315	74.7394	.	6506.12	16.1771	15.8883	5
chr6	35575151	35575201	chr6.35575151	74.7268	.	6505.02	17.1508	16.8005	49
chr22	21000068	21000103	chr22.21000068	74.7102	.	6503.58	19.7489	19.2358	0
chr1	36340995	36341060	chr1.36340995	74.6313	.	6496.71	22.0955	21.4202	59
chr2	70087675	70087695	chr2.70087675	74.6222	.	6495.92	10.8384	10.7226	18
chr2	173364833	173364871	chr2b.79364833	74.5704	.	6491.41	21.5374	20.899	13
chr11	6614925	6614958	chr11.6614925	74.5049	.	6485.71	18.5575	18.1145	4
chr6	43450893	43450933	chr6.43450893	74.4926	.	6484.64	22.7304	22.0076	24
chr17	72124141	72124196	chr17.72124141	74.4136	.	6477.77	18.8009	18.3337	38
chr22	41434891	41434971	chr22.41434891	74.3087	.	6468.64	27.0275	25.8665	7
chr1	40069764	40069797	chr1.40069764	74.2818	.	6466.29	18.5575	18.1145	0
chr1	158087824	158087850	chr1b.33087824	74.2697	.	6465.25	14.3944	14.1796	1
chr8	144099335	144099363	chr8.144099335	74.1068	.	6451.07	15.5826	15.3205	11
chr22	32802025	32802062	chr22.32802025	74.093	.	6449.87	20.941	20.3472	12
chrX	150471266	150471296	chrX.150471266	74.0126	.	6442.87	16.7718	16.4537	19
chr20	3927695	3927733	chr20.3927695	73.917	.	6434.55	21.5374	20.899	14
chr14	20457295	20457335	chr14.20457295	73.8745	.	6430.86	22.7304	22.0076	0
chr15	80695534	80695582	chr15.80695534	73.8134	.	6425.54	27.5075	26.3196	3
chr11	66539389	66539435	chr11.66539389	73.7924	.	6423.71	26.3126	25.2761	0
chr3	150409047	150409087	chr3b.59409047	73.6576	.	6411.98	22.7304	22.0076	0
chr19	49599461	49599560	chr19.49599461	73.6381	.	6410.28	33.2635	31.606	49
chr4	82798518	82798541	chr4.82798518	73.6031	.	6407.24	12.6146	12.456	8
chr7	74196168	74196200	chr7.74196168	73.5949	.	6406.53	17.962	17.5628	29
chr15	82262623	82262673	chr15.82262623	73.5899	.	6406.09	17.1513	16.8005	1
chr14	102726807	102726869	chr14.102726807	73.4599	.	6394.77	21.1077	20.4836	5
chrX	71056765	71056809	chrX.71056765	73.4473	.	6393.68	17.2172	16.8585	1
chr14	105395072	105395119	chr14.105395072	73.3805	.	6387.87	26.91	25.7963	15
chr16	56609360	56609387	chr16.56609360	73.3797	.	6387.8	14.9883	14.7519	4
chr5	177458082	177458126	chr5b.93458082	73.3207	.	6382.67	25.1181	24.192	2
chr10	79315319	79315359	chr10.79315319	73.2812	.	6379.22	22.7304	22.0076	4
chr10	63209117	63209152	chr10.63209117	73.2761	.	6378.78	12.1843	12.0295	0
chr16	69324806	69324841	chr16.69324806	73.2321	.	6374.96	19.7489	19.2358	7
chr5	179801813	179801873	chr5b.95801813	73.1924	.	6371.5	20.449	19.8681	22
chr22	30337740	30337784	chr22.30337740	73.1322	.	6366.26	25.1181	24.192	15
chr10	24607589	24607621	chr10.24607589	73.0317	.	6357.51	17.962	17.5628	9
chr11	65920450	65920479	chr11.65920450	73.0105	.	6355.67	16.1771	15.8883	7
chr1	26848650	26848716	chr1.26848650	72.9909	.	6353.96	22.4249	21.7075	11
chr3	49014699	49014753	chr3.49014699	72.9873	.	6353.65	18.471	18.0359	5
chr3	43080366	43080398	chr3.43080366	72.9344	.	6349.05	17.962	17.5628	0
chr17	66302948	66302984	chr17.66302948	72.9319	.	6348.83	20.3449	19.7906	4
chr8	38057149	38057171	chr8.38057149	72.9194	.	6347.75	12.022	11.8776	12
chr1	236551302	236551349	chr1b.111551302	72.8192	.	6339.02	16.1598	15.873	4
chr20	53576152	53576184	chr20.53576152	72.8048	.	6337.77	17.962	17.5628	0
chr2	37645891	37645923	chr2.37645891	72.7964	.	6337.04	17.962	17.5628	6
chr2	174572122	174572152	chr2b.80572122	72.6089	.	6320.73	16.7718	16.4537	0
chr9	79706761	79706802	chr9.79706761	72.49	.	6310.38	23.3271	22.556	35
chr9	127107962	127108014	chr9.127107962	72.4782	.	6309.35	17.8111	17.4199	6
chr16	28956229	28956257	chr16.28956229	72.4446	.	6306.43	15.5826	15.3205	10
chr2	69509350	69509398	chr2.69509350	72.27	.	6291.23	27.5075	26.3196	12
chr12	49763203	49763230	chr12.49763203	72.2659	.	6290.88	14.9883	14.7519	8
chr20	63567427	63567465	chr20.63567427	72.1712	.	6282.63	13.1802	13.0077	0
chr15	74449956	74449989	chr15.74449956	72.0394	.	6271.17	18.5575	18.1145	1
chr11	65619608	65619640	chr11.65619608	71.9766	.	6265.7	17.962	17.5628	1
chr22	41358760	41358796	chr22.41358760	71.9403	.	6262.55	20.3449	19.7906	5
chr3	49532931	49532988	chr3.49532931	71.9053	.	6259.5	19.4603	18.9551	1
chr14	65076542	65076597	chr14.65076542	71.8768	.	6257.02	18.8009	18.3337	44
chr12	122867093	122867129	chr12.122867093	71.8502	.	6254.71	20.3449	19.7906	26
chr7	2730319	2730354	chr7.2730319	71.8062	.	6250.88	19.7489	19.2358	27
chr11	61866165	61866236	chr11.61866165	71.7492	.	6245.92	24.0695	23.1988	13
chr15	78978982	78979025	chr15.78978982	71.6836	.	6240.21	24.521	23.6379	13
chr5	77776264	77776289	chr5.77776264	71.5211	.	6226.07	13.8008	13.6092	4
chr2	64636325	64636349	chr2.64636325	71.5076	.	6224.89	13.2075	13.0332	19
chr8	128081952	128081991	chr8.128081952	71.373	.	6213.18	13.5121	13.3217	11
chr1	151287060	151287099	chr1b.26287060	71.3516	.	6211.32	22.1338	21.453	12
chr5	151033677	151033714	chr5b.67033677	71.3382	.	6210.15	20.941	20.3472	34
chr7	128653085	128653123	chr7.128653085	71.3241	.	6208.93	21.5374	20.899	29
chr17	44932643	44932757	chr17.44932643	71.2799	.	6205.08	38.1804	36.2754	85
chr1	205795379	205795416	chr1b.80795379	71.2728	.	6204.46	20.941	20.3472	12
chr22	38486002	38486047	chr22.38486002	71.2569	.	6203.08	25.7153	24.7338	26
chr7	43955716	43955780	chr7.43955716	71.223	.	6200.13	21.7664	21.0971	40
chr17	81695037	81695071	chr17.81695037	71.1837	.	6196.71	19.1531	18.6739	3
chr12	6927777	6927797	chr12.6927777	71.1733	.	6195.8	10.8384	10.7226	0
chr8	144397772	144397799	chr8.144397772	71.1661	.	6195.18	14.9883	14.7519	25
chr6	27892935	27892967	chr6.27892935	71.1211	.	6191.26	17.962	17.5628	4
chr7	134448417	134448458	chr7.134448417	71.0514	.	6185.19	23.3271	22.556	16
chr3	148986683	148986733	chr3b.57986683	71.049	.	6184.98	19.48	18.9677	1
chr1	42929249	42929312	chr1.42929249	71.0291	.	6183.26	21.437	20.8046	11
chr7	143382817	143382854	chr7.143382817	70.9964	.	6180.41	20.941	20.3472	23
chr2	219224344	219224367	chr2b.125224344	70.98	.	6178.98	12.6146	12.456	0
chr15	88898911	88898951	chr15.88898911	70.9234	.	6174.06	22.7304	22.0076	37
chr12	15665824	15665861	chr12.15665824	70.888	.	6170.97	20.941	20.3472	10
chr5	135353080	135353127	chr5b.51353080	70.7913	.	6162.56	26.91	25.7963	41
chr8	118097963	118098031	chr8.118097963	70.787	.	6162.19	23.0827	22.3174	5
chr13	79366063	79366101	chr13.79366063	70.7269	.	6156.96	21.5374	20.899	36
chr20	41028983	41029035	chr20.41028983	70.7261	.	6156.89	17.8111	17.4199	43
chr12	124325441	124325473	chr12.124325441	70.7186	.	6156.23	17.962	17.5628	26
chrX	153953618	153953647	chrX.153953618	70.7043	.	6154.99	16.1771	15.8883	23
chrX	73846644	73846679	chrX.73846644	70.6564	.	6150.83	19.7489	19.2358	11
chr9	128908059	128908089	chr9.128908059	70.5201	.	6138.96	16.7718	16.4537	26
chr2	175181668	175181708	chr2b.81181668	70.5108	.	6138.16	22.7304	22.0076	7
chr5	172043865	172043894	chr5b.88043865	70.5065	.	6137.78	16.1771	15.8883	0
chr1	24669507	24669553	chr1.24669507	70.4046	.	6128.91	26.3126	25.2761	34
chr16	31093337	31093378	chr16.31093337	70.3867	.	6127.35	23.3271	22.556	13
chr3	44926718	44926750	chr3.44926718	70.3792	.	6126.7	17.962	17.5628	0
chr11	72292233	72292303	chr11.72292233	70.3696	.	6125.87	23.7406	22.9177	31
chr10	118005805	118005849	chr10.118005805	70.3289	.	6122.33	15.1678	14.9101	4
chr14	22878132	22878181	chr14.22878132	70.1839	.	6109.7	28.1051	26.8228	20
chr17	63608085	63608140	chr17.63608085	70.153	.	6107.02	18.8009	18.3337	7
chr22	23273677	23273707	chr22.23273677	70.1284	.	6104.88	16.7718	16.4537	2
chr9	123103360	123103406	chr9.123103360	70.0834	.	6100.97	26.3126	25.2761	9
chr1	202134158	202134193	chr1b.77134158	70.0758	.	6100.3	19.7489	19.2358	11
chr20	50191561	50191629	chr20.50191561	69.9157	.	6086.37	23.0827	22.3174	25
chr1	40770721	40770785	chr1.40770721	69.9008	.	6085.07	21.7663	21.0971	24
chr17	4972509	4972591	chr17.4972509	69.8485	.	6080.53	27.6845	26.4335	14
chr2	167955417	167955437	chr2b.73955417	69.8356	.	6079.4	10.8384	10.7226	0
chr11	57816501	57816544	chr11.57816501	69.7662	.	6073.36	24.521	23.6379	2
chr6	38153341	38153384	chr6.38153341	69.6917	.	6066.88	24.521	23.6379	20
chr7	66089305	66089348	chr7.66089305	69.5163	.	6051.62	24.521	23.6379	20
chr2	61188068	61188102	chr2.61188068	69.4312	.	6044.21	19.1531	18.6739	15
chr14	99515089	99515128	chr14.99515089	69.4105	.	6042.41	22.1338	21.453	11
chr8	144431088	144431135	chr8.144431088	69.3408	.	6036.34	26.91	25.7963	4
chr20	50931071	50931106	chr20.50931071	69.3191	.	6034.45	19.7489	19.2358	13
chr19	41238022	41238059	chr19.41238022	69.2667	.	6029.9	20.941	20.3472	4
chr12	56611893	56611923	chr12.56611893	69.1812	.	6022.46	16.7718	16.4537	2
chr20	64063789	64063848	chr20.64063789	69.0955	.	6015	20.1195	19.5718	50
chr3	149542442	149542483	chr3b.58542442	69.0934	.	6014.81	14.1753	13.9626	3
chr6	35425903	35425945	chr6.35425903	69.0646	.	6012.31	14.5059	14.2738	8
chr3	50236367	50236389	chr3.50236367	68.9559	.	6002.85	12.022	11.8776	21
chr16	1769967	1770032	chr16.1769967	68.934	.	6000.95	22.0955	21.4202	23
chr6	75123350	75123398	chr6.75123350	68.9306	.	6000.65	16.4903	16.1739	33
chr9	136477329	136477377	chr9.136477329	68.9284	.	6000.45	27.5075	26.3196	9
chr11	72712478	72712551	chr11.72712478	68.9227	.	5999.96	24.7271	23.814	9
chr20	2461737	2461788	chr20.2461737	68.9027	.	5998.22	17.481	17.098	15
chr7	32992178	32992228	chr7.32992178	68.8943	.	5997.49	17.1508	16.8005	22
chr1	27547686	27547771	chr1.27547686	68.8853	.	5996.71	28.6697	27.2702	34
chr19	46788469	46788527	chr19.46788469	68.8253	.	5991.49	19.7899	19.2491	20
chr1	63636243	63636287	chr1.63636243	68.7312	.	5983.3	25.1181	24.192	20
chr11	64768111	64768161	chr11.64768111	68.6993	.	5980.52	17.1508	16.8005	46
chr15	81001951	81001989	chr15.81001951	68.6437	.	5975.68	21.5374	20.899	0
chr14	73738885	73738934	chr14.73738885	68.6118	.	5972.9	28.1051	26.8228	35
chr12	52170697	52170764	chr12.52170697	68.5957	.	5971.51	22.7537	22.0076	61
chr6	85614997	85615025	chr6b.614997	68.5716	.	5969.41	15.5826	15.3205	23
chr3	42658762	42658805	chr3.42658762	68.5149	.	5964.47	24.521	23.6379	15
chr16	69318696	69318726	chr16.69318696	68.4738	.	5960.9	16.7718	16.4537	15
chr11	65598098	65598180	chr11.65598098	68.3974	.	5954.25	27.6845	26.4335	18
chr6	158503751	158503782	chr6b.73503751	68.3639	.	5951.34	17.3668	17.0077	13
chr9	35608888	35608940	chr9.35608888	68.3313	.	5948.5	17.8111	17.4199	30
chr10	92593309	92593342	chr10.92593309	68.2939	.	5945.24	18.5575	18.1145	15
chr1	26574107	26574150	chr1.26574107	68.2802	.	5944.05	24.521	23.6379	20
chr14	105397514	105397569	chr14.105397514	68.175	.	5934.9	18.8009	18.3337	28
chr1	153940962	153940995	chr1b.28940962	68.164	.	5933.94	18.5575	18.1145	0
chr11	71996600	71996666	chr11.71996600	68.1467	.	5932.43	22.4247	21.7075	2
chr17	50184235	50184275	chr17.50184235	68.0808	.	5926.71	22.7304	22.0076	6
chr7	100688700	100688752	chr7.100688700	68.0371	.	5922.9	17.8111	17.4199	1
chr14	73276847	73276872	chr14.73276847	67.9937	.	5919.12	13.8008	13.6092	20
chr15	24978229	24978263	chr15.24978229	67.9732	.	5917.34	19.1531	18.6739	13
chr12	56112917	56112958	chr12.56112917	67.9653	.	5916.65	23.3271	22.556	1
chr12	48837958	48838004	chr12.48837958	67.9607	.	5916.25	26.3126	25.2761	40
chr1	107057099	107057141	chr1.107057099	67.9407	.	5914.51	23.924	23.0951	7
chr11	67495455	67495509	chr11.67495455	67.8624	.	5907.7	18.471	18.0359	39
chr2	85309136	85309181	chr2.85309136	67.8402	.	5905.77	25.7153	24.7338	3
chr1	3781117	3781149	chr1.3781117	67.8033	.	5902.55	17.962	17.5628	0
chr16	2770651	2770702	chr16.2770651	67.7884	.	5901.26	17.481	17.098	4
chr1	150509541	150509589	chr1b.25509541	67.7624	.	5899	27.5075	26.3196	4
chr2	241255121	241255148	chr2b.147255121	67.6725	.	5891.17	14.9883	14.7519	0
chr11	61865859	61865940	chr11.61865859	67.662	.	5890.26	27.356	26.1802	40
chr17	77214016	77214072	chr17.77214016	67.5754	.	5882.72	19.1306	18.6581	49
chr8	143916281	143916331	chr8.143916281	67.5735	.	5882.56	17.1508	16.8005	37
chr9	136476560	136476601	chr9.136476560	67.4847	.	5874.83	23.3271	22.556	7
chr1	25808751	25808792	chr1.25808751	67.4639	.	5873.02	23.3271	22.556	8
chr14	22981968	22981998	chr14.22981968	67.4514	.	5871.94	16.7718	16.4537	28
chr1	15935158	15935193	chr1.15935158	67.4154	.	5868.8	19.7489	19.2358	3
chr12	56153923	56153971	chr12.56153923	67.3502	.	5863.13	27.5075	26.3196	0
chr5	73448387	73448412	chr5.73448387	67.3057	.	5859.25	13.8008	13.6092	9
chr10	133295962	133296003	chr10.133295962	67.2808	.	5857.08	23.3271	22.556	12
chr9	127948184	127948213	chr9.127948184	67.2625	.	5855.5	16.1771	15.8883	0
chr9	136724941	136724991	chr9.136724941	67.2092	.	5850.85	17.1508	16.8005	46
chr3	69879300	69879337	chr3.69879300	67.1759	.	5847.96	20.941	20.3472	20
chr2	95415264	95415306	chr2b.1415264	67.1028	.	5841.6	23.924	23.0951	8
chr17	75847591	75847640	chr17.75847591	67.1023	.	5841.56	28.1051	26.8228	14
chr21	45986659	45986695	chr21.45986659	67.1014	.	5841.48	20.3449	19.7906	20
chr16	67542859	67542925	chr16.67542859	67.0816	.	5839.76	22.4246	21.7075	15
chr11	119044438	119044486	chr11.119044438	67.0377	.	5835.93	27.5075	26.3196	44
chr14	21089287	21089319	chr14.21089287	67.0098	.	5833.51	17.962	17.5628	31
chr10	103661461	103661509	chr10.103661461	66.9995	.	5832.61	27.5075	26.3196	10
chr20	36782996	36783025	chr20.36782996	66.9784	.	5830.77	16.1771	15.8883	2
chr1	11840449	11840498	chr1.11840449	66.9343	.	5826.94	28.1051	26.8228	10
chr14	22872110	22872142	chr14.22872110	66.8567	.	5820.18	17.962	17.5628	9
chr5	72220087	72220112	chr5.72220087	66.7094	.	5807.37	13.8008	13.6092	0
[truncated: 1,680 more rows]

## Sheet: JAMM_VA13_hTR_1
Chrom	Start	End	Name	Score	Strand	Peak score	pVal	qVal	Point-source
chr13	45340094	45340135	chr13.45340094	10000	.	670761	23.3271	22.3107	19
chr1	109100230	109100566	chr1.109100230	9500.05	.	637226	110.727	106.432	10
chr6	26055997	26056114	chr6.26055997	8966.64	.	601447	39.1633	37.6912	86
chr8	143992893	143993144	chr8.143992893	7794.12	.	522799	82.9775	79.1943	74
chr9	35657815	35657950	chr9.35657815	7739.71	.	519150	45.0578	42.6739	105
chr7	5528308	5528773	chr7.5528308	7612.27	.	510601	149.175	144.278	407
chr10	17229516	17229601	chr10.17229516	7422.11	.	497846	28.6696	27.5631	44
chrX	154354941	154355000	chrX.154354941	5803.56	.	389280	20.1195	19.1743	33
chr13	45341107	45341140	chr13.45341107	5586.07	.	374692	18.5575	17.6525	12
chr21	37202432	37202519	chr21.37202432	4327.09	.	290244	29.3262	28.2141	16
chr12	6936830	6937157	chr12.6936830	4206.9	.	282183	107.79	103.592	47
chr9	110136253	110136347	chr9.110136253	3995.02	.	267970	31.6234	30.4861	40
chr8	143915819	143915936	chr8.143915819	3977.16	.	266772	39.1633	37.6912	54
chr5	10258197	10258233	chr5.10258197	3785.22	.	253898	20.3449	19.3975	21
chr14	20343212	20343353	chr14.20343212	3697.09	.	247986	47.0217	44.5345	115
chrX	154399896	154399941	chrX.154399896	3364.41	.	225672	25.7153	24.6519	36
chr3	47845750	47845842	chr3.47845750	3097.6	.	207775	30.9672	29.8456	35
chr3	129314816	129314955	chr3b.38314816	3056.58	.	205024	46.3671	43.9324	59
chr14	68789716	68789885	chr14.68789716	3020.3	.	202590	56.1817	53.2889	79
chr3	184183609	184183701	chr3b.93183609	2992.31	.	200713	30.9672	29.8456	29
chr12	55727155	55727291	chr12.55727155	2957.8	.	198397	45.3852	42.9877	55
chr3	184321523	184321585	chr3b.93321523	2929.97	.	196531	21.1077	20.1366	5
chr6	34245049	34245175	chr6.34245049	2848.71	.	191081	42.1112	39.8393	54
chr6	160047849	160047893	chr6b.75047849	2774.2	.	186083	25.1181	24.0645	35
chr17	81511247	81511625	chr17.81511247	2724.26	.	182733	124.433	119.837	41
chr7	5529183	5529279	chr7.5529183	2676.77	.	179547	32.2795	31.1359	37
chr15	72199503	72199596	chr15.72199503	2634.6	.	176719	31.2953	30.1672	47
chr13	110512081	110512141	chr13.110512081	2497.23	.	167504	20.449	19.4923	17
chr11	65505549	65505624	chr11.65505549	2358.37	.	158190	25.3846	24.3241	32
chr6	34245739	34245828	chr6.34245739	2324.72	.	155933	29.9827	28.8665	52
chr13	75853224	75853356	chr13.75853224	2289.95	.	153601	44.0757	41.7385	110
chr16	30070208	30070306	chr16.30070208	2250.27	.	150940	32.9355	31.7873	14
chr15	69452930	69452981	chr15.69452930	2245.91	.	150647	17.481	16.5977	25
chr6	52498384	52498507	chr6.52498384	2240.88	.	150309	41.1287	38.9018	64
chr8	143991338	143991551	chr8.143991338	2127.06	.	142675	70.5641	67.1142	173
chr6	44253277	44253325	chr6.44253277	2104.75	.	141179	27.5075	26.417	23
chr2	231712927	231713012	chr2b.137712927	2082.34	.	139675	28.6696	27.5631	5
chrX	47571475	47571550	chrX.47571475	1994.14	.	133759	25.3846	24.3241	40
chr8	143917922	143917969	chr8.143917922	1990.55	.	133518	26.91	25.8284	46
chr10	80169132	80169250	chr10.80169132	1978.97	.	132741	39.4909	37.9528	45
chr1	180196326	180196404	chr1b.55196326	1973.55	.	132378	26.3705	25.292	42
chr10	96949149	96949198	chr10.96949149	1936.73	.	129908	28.1051	27.0058	14
chr5	179836806	179836847	chr5b.95836806	1934.43	.	129754	23.3271	22.3107	15
chr2	206159981	206160018	chr2b.112159981	1879.9	.	126097	20.941	19.9813	2
chr7	150373425	150373550	chr7.150373425	1850.4	.	124117	41.7837	39.5378	44
chr13	45340761	45340781	chr13.45340761	1845.1	.	123762	10.8384	10.2364	6
chr9	88476392	88476434	chr9.88476392	1809.04	.	121343	23.924	22.8943	21
chr11	65892946	65893018	chr11.65892946	1799.72	.	120718	24.3983	23.3574	60
chrX	154349494	154349528	chrX.154349494	1791.71	.	120181	19.1531	18.2327	22
chr16	2519748	2519825	chr16.2519748	1780.92	.	119457	26.0419	24.9717	39
chr6	26156692	26156744	chr6.26156692	1742.16	.	116857	17.8111	16.9242	28
chrX	154348645	154348729	chrX.154348645	1733.66	.	116287	28.3412	27.2371	38
chr6	38703066	38703104	chr6.38703066	1707.96	.	114563	21.5374	20.5613	28
chr13	113322406	113322504	chr13.113322406	1701.27	.	114115	32.9355	31.7873	48
chr12	56117649	56117706	chr12.56117649	1679.01	.	112622	19.4603	18.5296	27
chr11	65892491	65892552	chr11.65892491	1673.65	.	112262	20.7784	19.8202	44
chr6	88612726	88612771	chr6b.3612726	1672.71	.	112199	25.7153	24.6519	6
chr7	100886383	100886426	chr7.100886383	1670.01	.	112018	24.521	23.4783	31
chrX	154400506	154400608	chrX.154400506	1666.22	.	111764	34.2472	33.0525	17
chr3	49111911	49112012	chr3.49111911	1661.03	.	111416	33.9193	32.7297	48
chr3	184170484	184170628	chr3b.93170484	1638.5	.	109904	48.0035	45.4793	66
chr14	102029574	102029619	chr14.102029574	1627.85	.	109190	25.7153	24.6519	10
chr11	319722	319766	chr11.319722	1599.4	.	107281	25.1181	24.0645	12
chr5	17275754	17275838	chr5.17275754	1598.3	.	107208	28.3412	27.2371	42
chr11	62790616	62790665	chr11.62790616	1595.94	.	107049	28.1051	27.0058	13
chr20	24963869	24963947	chr20.24963869	1572.02	.	105445	26.3705	25.292	59
chr8	38347748	38347785	chr8.38347748	1568.54	.	105212	20.941	19.9813	10
chrX	154360290	154360378	chrX.154360290	1546.2	.	103713	29.6545	28.5401	49
chrX	53604625	53604669	chrX.53604625	1538.18	.	103175	25.1181	24.0645	12
chr2	9584594	9584634	chr2.9584594	1533.41	.	102855	22.7304	21.727	13
chr7	5527336	5527421	chr7.5527336	1521.59	.	102063	28.6696	27.5631	46
chr15	72200554	72200582	chr15.72200554	1519.47	.	101920	15.5826	14.7463	11
chr2	240466586	240466809	chr2b.146466586	1498.67	.	100525	73.8314	70.3145	150
chr4	1983884	1984046	chr4.1983884	1493.14	.	100154	53.8924	51.0922	117
chr6	157201335	157201378	chr6b.72201335	1488.47	.	99840.5	14.837	14.0231	0
chrX	135032984	135033102	chrX.135032984	1484.89	.	99600.6	39.4909	37.9528	6
chr1	154602407	154602461	chr1b.29602407	1482.67	.	99451.8	18.471	17.5689	23
chr5	917155	917207	chr5.917155	1475.66	.	98981.7	17.8111	16.9242	25
chr7	100678791	100678832	chr7.100678791	1474.25	.	98887.2	23.3271	22.3107	13
chr10	102107854	102108082	chr10.102107854	1469.22	.	98549.5	75.4649	71.9101	182
chrX	53538875	53538921	chrX.53538875	1469.13	.	98543.7	26.3126	25.2407	7
chr1	151400061	151400111	chr1b.26400061	1466.45	.	98363.8	17.1508	16.2804	26
chr19	3976335	3976596	chr19.3976335	1459.39	.	97890.1	86.2432	82.3461	100
chr2	233275760	233275956	chr2b.139275760	1452.35	.	97418.2	65.0087	61.7928	13
chr6	113857471	113857514	chr6b.28857471	1447.23	.	97074.4	24.521	23.4783	15
chr3	185925524	185925564	chr3b.94925524	1441.52	.	96691.6	22.7304	21.727	19
chr8	38413233	38413376	chr8.38413233	1432.18	.	96064.9	47.6763	45.1683	119
chr11	75404772	75404809	chr11.75404772	1431.8	.	96039.5	20.941	19.9813	12
chr1	149923502	149923614	chr1b.24923502	1430.58	.	95957.6	37.5251	36.1426	43
chr1	154207526	154207568	chr1b.29207526	1429.88	.	95910.9	23.924	22.8943	22
chr2	237341043	237341087	chr2b.143341043	1416.97	.	95044.9	25.1181	24.0645	23
chr11	65920934	65920972	chr11.65920934	1414.42	.	94873.6	21.5374	20.5613	9
chrX	41347932	41347989	chrX.41347932	1405.9	.	94302.2	19.4603	18.5296	39
chr15	72199108	72199132	chr15.72199108	1391.89	.	93362.8	13.2075	12.4588	2
chr1	152032564	152032617	chr1b.27032564	1390.74	.	93285.1	18.1411	17.2426	16
chr5	32228966	32229112	chr5.32228966	1390.44	.	93265.1	48.658	46.1052	85
chr8	133238650	133238688	chr8.133238650	1389.78	.	93220.8	21.5374	20.5613	19
chr20	36549605	36549715	chr20.36549605	1371.83	.	92017.2	36.8697	35.5179	57
chr6	34245383	34245435	chr6.34245383	1371.3	.	91981.1	17.8111	16.9242	21
chr16	28836732	28836892	chr16.28836732	1369.49	.	91860	53.2382	50.4516	99
chr13	29513129	29513180	chr13.29513129	1356.56	.	90992.6	17.481	16.5977	28
chr2	84906529	84906569	chr2.84906529	1354.13	.	90829.8	22.7304	21.727	16
chr1	19339289	19339357	chr1.19339289	1346.37	.	90309	23.0827	22.0679	36
chrX	153960108	153960154	chrX.153960108	1339.73	.	89863.8	26.3126	25.2407	30
chr3	184317735	184317780	chr3b.93317735	1335.77	.	89598.4	25.7153	24.6519	29
chr1	201484638	201484678	chr1b.76484638	1327.72	.	89058.3	22.7304	21.727	14
chr13	109784167	109784221	chr13.109784167	1326.2	.	88956.3	18.4711	17.5689	32
chr3	9464505	9464552	chr3.9464505	1314.97	.	88202.9	26.91	25.8284	29
chrX	12975150	12975169	chrX.12975150	1312.26	.	88021.2	10.2473	9.7254	7
chr1	205791218	205791301	chr1b.80791218	1304.34	.	87489.8	28.0129	26.915	45
chr13	49198395	49198441	chr13.49198395	1301.2	.	87279.5	26.3126	25.2407	18
chr12	6967391	6967483	chr12.6967391	1294.53	.	86832.2	30.9672	29.8456	0
chr3	49531760	49531939	chr3.49531760	1291.37	.	86620.2	59.4515	56.4294	0
chr16	2767769	2767914	chr16.2767769	1288.47	.	86425.7	48.3307	45.7972	63
chr1	24654917	24654962	chr1.24654917	1286.31	.	86280.4	25.7153	24.6519	29
chr2	215435910	215435948	chr2b.121435910	1279.86	.	85847.9	21.5374	20.5613	22
chr14	22846837	22846886	chr14.22846837	1277.83	.	85712	28.1051	27.0058	19
chr3	184317449	184317501	chr3b.93317449	1265.06	.	84855.1	17.8111	16.9242	29
chr5	72199738	72199772	chr5.72199738	1262.61	.	84690.7	19.1531	18.2327	11
chr10	119677222	119677271	chr10.119677222	1260	.	84515.6	28.1051	27.0058	14
chrX	65740873	65740934	chrX.65740873	1259.54	.	84484.9	20.7784	19.8202	14
chr1	228098601	228098780	chr1b.103098601	1257.44	.	84343.9	59.4515	56.4294	113
chr6	113860075	113860157	chr6b.28860075	1251.9	.	83972.6	27.6845	26.5886	35
chr10	97432553	97432600	chr10.97432553	1248.8	.	83764.4	16.1598	15.3103	23
chr7	5529612	5529652	chr7.5529612	1240.65	.	83217.7	22.7304	21.727	35
chr11	74034148	74034211	chr11.74034148	1239.36	.	83131.7	21.437	20.4625	38
chr10	124989543	124989601	chr10.124989543	1234.93	.	82834.3	19.7899	18.8473	23
chr3	127691776	127691833	chr3b.36691776	1233.93	.	82767.3	19.4603	18.5296	11
chr1	8013554	8013613	chr1.8013554	1231.22	.	82585.2	20.1195	19.1743	28
chrX	154367465	154367494	chrX.154367465	1229.24	.	82452.4	16.1771	15.3264	12
chr22	36282551	36282606	chr22.36282551	1208.02	.	81029.5	18.8009	17.8851	50
chr2	43224795	43224961	chr2.43224795	1188.52	.	79721	55.2006	52.3527	38
chr13	113860746	113860790	chr13.113860746	1186.06	.	79556.5	25.1181	24.0645	13
chr6	89081074	89081145	chr6b.4081074	1180.98	.	79215.3	24.0695	23.0302	27
chr6	7883092	7883139	chr6.7883092	1169.28	.	78430.7	26.91	25.8284	9
chr8	143925724	143925870	chr8.143925724	1166.57	.	78249.1	48.658	46.1052	52
chr7	100868545	100868691	chr7.100868545	1158.67	.	77719.3	48.658	46.1052	1
chr3	124968141	124968167	chr3b.33968141	1157.44	.	77636.2	9.18429	8.78877	9
chr13	79368838	79368889	chr13.79368838	1157.05	.	77610.1	17.481	16.5977	22
chr20	63521532	63521619	chr20.63521532	1154.23	.	77421	29.3262	28.2141	47
chr13	44575459	44575508	chr13.44575459	1153.74	.	77388.4	16.8207	15.9528	10
chrX	49030048	49030147	chrX.49030048	1151.96	.	77269.1	33.2635	32.0888	46
chr1	150294270	150294307	chr1b.25294270	1148.63	.	77045.4	20.941	19.9813	19
chr10	24607783	24607823	chr10.24607783	1146.93	.	76931.5	22.7304	21.727	6
chr13	114325387	114325431	chr13.114325387	1141.57	.	76572.1	25.1181	24.0645	0
chr11	66277143	66277253	chr11.66277143	1141.22	.	76548.7	36.8697	35.5179	54
chr5	38933339	38933386	chr5.38933339	1134.41	.	76091.8	26.91	25.8284	20
chr5	72196668	72196762	chr5.72196668	1132.35	.	75953.3	31.6234	30.4861	7
chr3	184335031	184335087	chr3b.93335031	1131.91	.	75924.1	19.1308	18.2123	14
chr8	123014961	123015092	chr8.123014961	1123.4	.	75353.4	43.7483	41.431	67
chr2	206004382	206004557	chr2b.112004382	1118.49	.	75024.1	58.1437	55.215	114
chr8	143260553	143260805	chr8.143260553	1114.06	.	74726.7	83.3041	79.4861	115
chr1	158094756	158094940	chr1b.33094756	1109.7	.	74434.6	61.0862	57.9672	79
chr19	41259774	41260006	chr19.41259774	1107.28	.	74271.9	76.7715	73.1966	52
chrX	154362293	154362313	chrX.154362293	1105.86	.	74177	10.8384	10.2364	4
chr3	49359956	49359991	chr3.49359956	1104.53	.	74087.6	19.7489	18.8154	18
chr14	55063097	55063146	chr14.55063097	1094.52	.	73416.3	28.1051	27.0058	17
chr4	82373790	82373845	chr4.82373790	1088.87	.	73037.2	18.8009	17.8851	35
chr11	74254434	74254491	chr11.74254434	1085.67	.	72822.7	19.4603	18.5296	19
chr9	131485028	131485141	chr9.131485028	1081.12	.	72517.6	37.8528	36.4329	91
chr15	75675053	75675101	chr15.75675053	1078.88	.	72367	27.5075	26.417	25
chr2	73258937	73259022	chr2.73258937	1067.12	.	71577.9	28.6696	27.5631	47
chrX	119468476	119468527	chrX.119468476	1060.87	.	71159.1	17.481	16.5977	0
chr5	172951374	172951427	chr5b.88951374	1060.61	.	71141.6	18.1411	17.2426	15
chr14	74781609	74781812	chr14.74781609	1058.79	.	71019.5	67.2964	64.0013	33
chr5	140529396	140529606	chr5b.56529396	1051.61	.	70537.7	69.5839	66.2052	51
chr3	127690437	127690521	chr3b.36690437	1050.31	.	70450.6	28.3412	27.2371	25
chr12	110019192	110019241	chr12.110019192	1048.13	.	70304.8	28.1051	27.0058	14
chr15	41480840	41480938	chr15.41480840	1041.37	.	69850.9	32.9355	31.7873	54
chr2	96253712	96253796	chr2b.2253712	1038.53	.	69660.5	28.3413	27.2371	25
chr7	101138000	101138046	chr7.101138000	1034.98	.	69422.1	26.3126	25.2407	41
chr7	66153661	66153706	chr7.66153661	1034.19	.	69369.2	25.7153	24.6519	9
chr12	69258793	69258906	chr12.69258793	1033.74	.	69339	37.8528	36.4329	71
chr20	63521718	63521765	chr20.63521718	1031.21	.	69169.2	26.91	25.8284	0
chr2	86481966	86482006	chr2.86481966	1024.23	.	68701.7	22.7304	21.727	20
chr21	44806236	44806335	chr21.44806236	1017.03	.	68218.6	33.2635	32.0888	43
chrX	10567431	10567478	chrX.10567431	1016.84	.	68205.9	16.1599	15.3103	24
chr10	72368119	72368165	chr10.72368119	1005.99	.	67477.7	26.3126	25.2407	25
chr14	22846178	22846410	chr14.22846178	1004.47	.	67375.9	76.7715	73.1966	128
chr4	7054669	7054758	chr4.7054669	995.047	.	66743.9	29.9827	28.8665	30
chr15	96337452	96337503	chr15.96337452	994.964	.	66738.3	17.481	16.5977	19
chr10	102382242	102382303	chr10.102382242	992.901	.	66599.9	20.7784	19.8202	22
chr3	48469140	48469180	chr3.48469140	986.828	.	66192.6	22.7304	21.727	29
chr15	64678131	64678245	chr15.64678131	986.79	.	66190	38.1804	36.7338	49
chr15	43800661	43800711	chr15.43800661	981.663	.	65846.1	17.1508	16.2804	17
chr4	80203485	80203526	chr4.80203485	981.378	.	65827	23.3271	22.3107	13
chr9	137242775	137242804	chr9.137242775	970.589	.	65103.3	16.1771	15.3264	0
chrX	65741636	65741671	chrX.65741636	968.412	.	64957.3	19.7489	18.8154	0
chr15	88898839	88899102	chr15.88898839	967.982	.	64928.5	86.8963	82.9534	35
chr7	2661918	2662114	chr7.2661918	967.62	.	64904.1	65.0087	61.7928	58
chr6	158095838	158095932	chr6b.73095838	967.08	.	64867.9	31.6234	30.4861	14
chr15	74845038	74845092	chr15.74845038	961.487	.	64492.7	18.471	17.5689	22
chr2	203439608	203439650	chr2b.109439608	957.471	.	64223.4	23.924	22.8943	0
chr7	143390782	143390840	chr7.143390782	955.424	.	64086.1	19.7899	18.8473	0
chr14	68874769	68874843	chr14.68874769	946.054	.	63457.6	25.0559	24.0038	38
chr10	102159468	102159516	chr10.102159468	942.042	.	63188.4	27.5075	26.417	19
chr8	100706744	100706768	chr8.100706744	941.993	.	63185.2	13.2075	12.4588	20
chr13	39013535	39013582	chr13.39013535	941.854	.	63175.9	26.91	25.8284	20
chrX	78104270	78104322	chrX.78104270	941.5	.	63152.1	17.8111	16.9242	23
chr14	102933371	102933436	chr14.102933371	940.073	.	63056.4	22.0955	21.1072	35
chr2	74361306	74361354	chr2.74361306	939.88	.	63043.4	27.5075	26.417	31
chr8	23842648	23842696	chr8.23842648	937.218	.	62864.9	27.5075	26.417	7
chr4	2250459	2250501	chr4.2250459	935.785	.	62768.8	23.924	22.8943	17
chr5	73498485	73498533	chr5.73498485	934.231	.	62664.5	27.5075	26.417	9
chr5	179623064	179623103	chr5b.95623064	934.043	.	62651.9	22.1338	21.1438	14
chr5	10679466	10679498	chr5.10679466	933.962	.	62646.5	17.962	17.072	16
chr5	10679711	10679738	chr5.10679711	933.936	.	62644.8	14.9883	14.1694	12
chr3	112638722	112638767	chr3b.21638722	931.85	.	62504.9	25.7153	24.6519	30
chr5	112842326	112842396	chr5b.28842326	931.608	.	62488.6	23.7407	22.7126	17
chr1	153535308	153535358	chr1b.28535308	921.707	.	61824.5	17.1508	16.2804	27
chr4	40815760	40815785	chr4.40815760	917.151	.	61518.9	13.8008	13.0317	20
chr11	62572619	62572647	chr11.62572619	915.106	.	61381.7	15.5826	14.7463	15
chr1	201483690	201483733	chr1b.76483690	912.173	.	61185	24.521	23.4783	40
chr6	34240814	34240859	chr6.34240814	908.659	.	60949.3	25.7153	24.6519	26
chr5	177331881	177331931	chr5b.93331881	908.106	.	60912.2	17.1508	16.2804	20
chr13	45339550	45339591	chr13.45339550	905.328	.	60725.9	14.1746	13.3863	4
chr1	43591305	43591355	chr1.43591305	899.922	.	60363.2	17.1508	16.2804	16
chrX	47214932	47214977	chrX.47214932	899.347	.	60324.7	15.4986	14.6643	36
chr13	49997303	49997334	chr13.49997303	898.193	.	60247.3	17.3668	16.4918	12
chr3	195867907	195868061	chr3b.104867907	896.608	.	60140.9	51.2755	48.5958	91
chr8	144514219	144514258	chr8.144514219	892.912	.	59893	22.1338	21.1438	5
chr14	55612470	55612517	chr14.55612470	890.73	.	59746.7	26.91	25.8284	26
chr4	48831162	48831188	chr4.48831162	887.318	.	59517.8	14.3944	13.6005	7
chr16	24930940	24931220	chr16.24930940	885.07	.	59367	92.4473	88.4532	114
chr7	143305026	143305071	chr7.143305026	884.711	.	59342.9	25.7153	24.6519	40
chr20	36050565	36050782	chr20.36050565	882.179	.	59173.1	71.8711	68.3889	198
chr18	47868367	47868442	chr18.47868367	876.066	.	58763	25.3846	24.3241	26
chr8	140515426	140515474	chr8.140515426	875.202	.	58705.1	27.5075	26.417	0
chr5	173318001	173318041	chr5b.89318001	874.286	.	58643.7	22.7304	21.727	11
chr14	104719359	104719475	chr14.104719359	871.589	.	58462.7	38.8357	37.3652	20
chrX	47228793	47228840	chrX.47228793	870.872	.	58414.7	26.91	25.8284	22
chr5	150554132	150554208	chr5b.66554132	869.45	.	58319.3	25.7132	24.6511	25
chr12	6870392	6870441	chr12.6870392	867.406	.	58182.2	28.1051	27.0058	0
chrX	49029829	49029915	chrX.49029829	866.297	.	58107.8	28.9979	27.8896	37
chr2	61888504	61888538	chr2.61888504	865.554	.	58058	19.1531	18.2327	13
chr8	144313984	144314049	chr8.144313984	863.835	.	57942.7	22.0955	21.1072	34
chr7	33005870	33005926	chr7.33005870	862.594	.	57859.4	19.1306	18.2123	33
chr1	167541365	167541434	chr1b.42541365	861.869	.	57810.8	23.4117	22.3858	22
chr13	29511095	29511133	chr13.29511095	861.134	.	57761.5	21.5374	20.5613	4
chr3	184259654	184259694	chr3b.93259654	861.123	.	57760.7	22.7304	21.727	0
chr11	66004017	66004061	chr11.66004017	858.714	.	57599.2	25.1181	24.0645	12
chr8	38060139	38060171	chr8.38060139	857.945	.	57547.6	17.962	17.072	12
chr15	72202512	72202554	chr15.72202512	856.498	.	57450.5	23.924	22.8943	25
chr5	140568195	140568233	chr5b.56568195	855.525	.	57385.2	21.5374	20.5613	27
chr3	119825069	119825109	chr3b.28825069	850.299	.	57034.7	22.7304	21.727	19
chr4	1026679	1026800	chr4.1026679	849.733	.	56996.7	46.1085	43.6797	0
chr10	102644562	102644670	chr10.102644562	844.377	.	56637.5	36.2142	34.8681	55
chr15	59080979	59081017	chr15.59080979	842.246	.	56494.6	21.5374	20.5613	7
chr13	44989120	44989164	chr13.44989120	840.953	.	56407.8	17.2172	16.3428	14
chr14	23325704	23325752	chr14.23325704	840.585	.	56383.2	27.5075	26.417	34
chrX	54445014	54445103	chrX.54445014	838.988	.	56276	29.9827	28.8665	30
chr21	43690397	43690447	chr21.43690397	837.099	.	56149.3	17.1508	16.2804	15
chr5	141528871	141528921	chr5b.57528871	834.913	.	56002.7	17.1508	16.2804	27
chr11	65921379	65921419	chr11.65921379	833.661	.	55918.7	22.7304	21.727	0
chr21	44323886	44323926	chr21.44323886	833.39	.	55900.5	22.7304	21.727	22
chr2	105280514	105280655	chr2b.11280514	833.304	.	55894.8	47.0217	44.5345	90
chr11	64767569	64767664	chr11.64767569	828.769	.	55590.6	31.9514	30.811	49
chr13	46052460	46052493	chr13.46052460	828.36	.	55563.1	18.5575	17.6525	4
chr8	143924059	143924141	chr8.143924059	827.113	.	55479.5	27.6845	26.5886	3
chr3	47870968	47871014	chr3.47870968	825.914	.	55399.1	26.3126	25.2407	19
chr16	30069934	30069977	chr16.30069934	825.097	.	55344.3	24.521	23.4783	42
chr1	24841136	24841187	chr1.24841136	824.554	.	55307.9	17.481	16.5977	16
chr5	154419324	154419372	chr5b.70419324	822.262	.	55154.1	27.5075	26.417	38
chr8	133238060	133238086	chr8.133238060	821.17	.	55080.9	14.3944	13.6005	4
chr10	8058666	8058773	chr10.8058666	819.361	.	54959.5	35.8865	34.5455	63
chrX	10130031	10130070	chrX.10130031	814.206	.	54613.7	22.1338	21.1438	31
chr8	100721480	100721530	chr8.100721480	808.578	.	54236.2	17.1508	16.2804	11
chr8	41309370	41309418	chr8.41309370	808.052	.	54200.9	27.5075	26.417	35
chr2	46380308	46380441	chr2.46380308	804.258	.	53946.5	44.4031	42.0513	79
chr1	16393322	16393376	chr1.16393322	804.251	.	53946	18.471	17.5689	27
chrX	153929959	153930004	chrX.153929959	799.568	.	53631.9	25.7153	24.6519	19
chr1	633994	634039	chr1.633994	798.951	.	53590.5	25.7153	24.6519	34
chrX	154354676	154354699	chrX.154354676	797.32	.	53481.1	12.6146	11.9004	15
chr20	45898464	45898503	chr20.45898464	796.967	.	53457.4	22.1338	21.1438	13
chr8	47836403	47836434	chr8.47836403	794.654	.	53302.3	17.3668	16.4918	30
chr8	25411447	25411555	chr8.25411447	793.983	.	53257.3	36.2142	34.8681	36
chr6	148544569	148544681	chr6b.63544569	793.026	.	53193.1	37.5251	36.1426	17
chr8	143930426	143930455	chr8.143930426	791.363	.	53081.5	16.1771	15.3264	9
chr20	43716189	43716301	chr20.43716189	788.909	.	52917	37.5251	36.1426	8
chr2	32597851	32597897	chr2.32597851	787.54	.	52825.1	26.3126	25.2407	12
chr8	143924886	143924923	chr8.143924886	787.102	.	52795.7	20.941	19.9813	8
chr10	97717786	97717846	chr10.97717786	784.627	.	52629.7	20.449	19.4923	18
chr5	154815275	154815311	chr5b.70815275	779.832	.	52308.1	20.3449	19.3975	13
chr11	66244340	66244544	chr11.66244340	779.492	.	52285.3	67.6232	64.2943	22
chr12	124334529	124334572	chr12.124334529	777.452	.	52148.4	24.521	23.4783	26
chr3	184316202	184316246	chr3b.93316202	774.986	.	51983	25.1181	24.0645	10
chr1	156786777	156786918	chr1b.31786777	774.699	.	51963.8	47.0217	44.5345	35
chr10	98417349	98417556	chr10.98417349	774.486	.	51949.5	68.6036	65.2379	26
chr3	188609313	188609380	chr3b.97609313	769.472	.	51613.2	22.7537	21.7402	55
chr12	6938579	6938630	chr12.6938579	769.234	.	51597.2	17.481	16.5977	22
chr7	36406242	36406300	chr7.36406242	765.869	.	51371.5	19.7899	18.8473	29
chr10	102479292	102479337	chr10.102479292	765.566	.	51351.2	25.7153	24.6519	12
chr6	113857785	113857812	chr6b.28857785	763.859	.	51236.6	14.9883	14.1694	2
chr9	133362446	133362478	chr9.133362446	762.844	.	51168.6	17.962	17.072	23
chr1	54871514	54871546	chr1.54871514	760.052	.	50981.3	17.962	17.072	18
chr2	36537442	36537505	chr2.36537442	759.638	.	50953.5	21.437	20.4625	20
chr8	144526514	144526696	chr8.144526514	759.307	.	50931.3	60.4323	57.3547	162
chr1	159918427	159918508	chr1b.34918427	755.074	.	50647.4	27.356	26.2677	21
chr9	131198048	131198107	chr9.131198048	754.91	.	50636.4	20.1195	19.1743	33
chrX	49029483	49029553	chrX.49029483	753.636	.	50551	23.7406	22.7126	30
chr8	142736786	142736833	chr8.142736786	753.303	.	50528.6	26.91	25.8284	42
chr20	63933574	63933666	chr20.63933574	753.132	.	50517.2	30.9672	29.8456	51
chr13	52030263	52030312	chr13.52030263	751.345	.	50397.3	28.1051	27.0058	19
chr3	184170100	184170226	chr3b.93170100	745.305	.	49992.1	42.1111	39.8393	19
chr10	102479938	102479988	chr10.102479938	740.713	.	49684.1	17.1509	16.2804	25
chr8	144516647	144516759	chr8.144516647	739.027	.	49571.1	37.5251	36.1426	59
chr15	90882293	90882424	chr15.90882293	738.948	.	49565.8	43.7483	41.431	82
chr3	184174931	184174963	chr3b.93174931	738.85	.	49559.2	17.962	17.072	21
chr1	116404457	116404506	chr1.116404457	738.054	.	49505.8	28.1051	27.0058	16
chr7	128652861	128652982	chr7.128652861	737.445	.	49464.9	40.4736	38.434	63
chrX	119574618	119574752	chrX.119574618	736.516	.	49402.6	44.7305	42.3571	117
chr10	68210866	68210910	chr10.68210866	735.308	.	49321.5	25.1181	24.0645	14
chr12	51063742	51063897	chr12.51063742	735.194	.	49313.9	51.6026	48.9096	97
chr6	99410835	99410882	chr6b.14410835	733.103	.	49173.7	26.91	25.8284	14
chr5	134666859	134666908	chr5b.50666859	732.488	.	49132.4	28.1051	27.0058	12
chrX	154025378	154025522	chrX.154025378	727.666	.	48809	48.0035	45.4793	30
chr6	158095958	158096030	chr6b.73095958	724.763	.	48614.2	24.3984	23.3574	50
chr3	58123190	58123223	chr3.58123190	724.328	.	48585.1	18.5575	17.6525	1
chr15	41899926	41899985	chr15.41899926	723.514	.	48530.4	20.1196	19.1743	32
chr6	113860326	113860363	chr6b.28860326	720.105	.	48301.8	20.941	19.9813	0
chr14	102049814	102049864	chr14.102049814	717.018	.	48094.8	17.1508	16.2804	16
chr7	44767854	44767958	chr7.44767854	716.368	.	48051.2	34.903	33.6863	41
chr5	177491046	177491078	chr5b.93491046	715.078	.	47964.6	17.962	17.072	15
chr1	85320813	85320865	chr1.85320813	714.575	.	47930.9	17.8111	16.9242	31
chr13	113820872	113820904	chr13.113820872	714.443	.	47922.1	17.962	17.072	19
chr3	183810555	183810595	chr3b.92810555	711.651	.	47734.7	22.7304	21.727	13
chr11	102205925	102205968	chr11.102205925	710.942	.	47687.2	24.521	23.4783	7
chr4	2249665	2249696	chr4.2249665	707.634	.	47465.3	10.8536	10.2413	9
chr2	8733523	8733563	chr2.8733523	706.553	.	47392.8	22.7304	21.727	17
chr13	113861856	113861893	chr13.113861856	706.05	.	47359	20.941	19.9813	7
chr1	158087815	158087848	chr1b.33087815	705.002	.	47288.7	18.5575	17.6525	10
chr8	130060960	130060980	chr8.130060960	704.692	.	47268	10.8384	10.2364	12
chr2	28404219	28404258	chr2.28404219	703.254	.	47171.5	22.1338	21.1438	16
chr16	30604911	30605028	chr16.30604911	700.518	.	46988	39.1633	37.6912	21
chr15	40624974	40625021	chr15.40624974	697.034	.	46754.3	26.91	25.8284	8
chr6	34242751	34242783	chr6.34242751	695.671	.	46662.9	17.962	17.072	16
chr12	55966819	55966861	chr12.55966819	694.737	.	46600.2	23.924	22.8943	19
chr13	113861573	113861613	chr13.113861573	693.881	.	46542.8	22.7304	21.727	9
chr3	128912576	128912620	chr3b.37912576	693.529	.	46519.2	25.1181	24.0645	4
chr16	1998389	1998490	chr16.1998389	693.472	.	46515.4	33.9193	32.7297	45
chr10	103602690	103602811	chr10.103602690	692.185	.	46429.1	40.4736	38.434	40
chr8	143929176	143929217	chr8.143929176	691.496	.	46382.9	23.3271	22.3107	27
chr2	55049908	55049965	chr2.55049908	689.591	.	46255.1	19.4604	18.5296	34
chr10	97457172	97457232	chr10.97457172	688.042	.	46151.2	20.449	19.4923	21
chrX	154450494	154450542	chrX.154450494	687.74	.	46130.9	27.5075	26.417	40
chr6	138915900	138915921	chr6b.53915900	687.266	.	46099.1	11.43	10.764	0
chr14	65062133	65062182	chr14.65062133	687.035	.	46083.6	28.1051	27.0058	17
chr14	22767334	22767377	chr14.22767334	686.297	.	46034.1	24.521	23.4783	14
chr6	108074332	108074535	chr6b.23074332	685.119	.	45955.1	67.2964	64.0013	3
chrX	153958145	153958191	chrX.153958145	682.115	.	45753.6	26.3126	25.2407	15
chr13	21177018	21177164	chr13.21177018	681.638	.	45721.6	48.658	46.1052	4
chr19	583225	583296	chr19.583225	681.547	.	45715.5	24.0695	23.0302	40
chr1	46035462	46035577	chr1.46035462	680.22	.	45626.5	38.5081	37.0405	73
chr6	26124271	26124304	chr6.26124271	680.083	.	45617.3	18.5575	17.6525	13
chr13	113854576	113854616	chr13.113854576	679.792	.	45597.8	22.7304	21.727	0
chr8	66429398	66429436	chr8.66429398	679.299	.	45564.7	21.5374	20.5613	6
chr9	130884115	130884152	chr9.130884115	675.994	.	45343	20.941	19.9813	0
chr8	22138178	22138219	chr8.22138178	674.557	.	45246.6	23.3271	22.3107	8
chr2	46382463	46382510	chr2.46382463	674.268	.	45227.2	26.91	25.8284	17
chr5	73446804	73446841	chr5.73446804	673.648	.	45185.7	20.941	19.9813	2
chr8	11847744	11847790	chr8.11847744	673.616	.	45183.5	26.3126	25.2407	9
chr21	29343525	29343566	chr21.29343525	673.546	.	45178.8	23.3271	22.3107	1
chr12	120701747	120701795	chr12.120701747	672.846	.	45131.8	27.5075	26.417	25
chr1	150268808	150268853	chr1b.25268808	670.53	.	44976.5	25.7153	24.6519	31
chr19	48966654	48966715	chr19.48966654	669.055	.	44877.6	20.7784	19.8202	29
chr3	49705621	49705666	chr3.49705621	667.788	.	44792.6	25.7153	24.6519	19
chr2	27055150	27055196	chr2.27055150	667.017	.	44740.9	26.3126	25.2407	2
chr5	14297839	14297888	chr5.14297839	665.898	.	44665.8	28.1051	27.0058	8
chr13	113834232	113834273	chr13.113834232	665.842	.	44662.1	23.3271	22.3107	5
chr12	111516228	111516277	chr12.111516228	662.975	.	44469.8	28.1051	27.0058	15
chr1	63634900	63634938	chr1.63634900	661.373	.	44362.3	21.5374	20.5613	18
chr1	119916124	119916159	chr1.119916124	661.165	.	44348.3	19.7489	18.8154	4
chr21	44326944	44327053	chr21.44326944	660.981	.	44336	36.5419	35.1921	31
chr6	134170270	134170310	chr6b.49170270	659.99	.	44269.5	22.7304	21.727	5
chr8	144314386	144314439	chr8.144314386	658.851	.	44193.1	18.1411	17.2426	32
chr3	186080019	186080048	chr3b.95080019	657.102	.	44075.8	16.1771	15.3264	3
chr5	14509147	14509190	chr5.14509147	655.283	.	43953.8	24.521	23.4783	0
chr11	69648034	69648076	chr11.69648034	652.712	.	43781.4	23.924	22.8943	11
chr1	150471809	150471986	chr1b.25471809	652.271	.	43751.8	58.7976	55.8299	122
chr11	62888688	62888742	chr11.62888688	651.829	.	43722.1	18.471	17.5689	22
chr17	50184889	50185146	chr17.50184889	651.081	.	43671.9	84.937	81.0812	216
chr14	22877212	22877329	chr14.22877212	650.711	.	43647.1	39.1633	37.6912	60
chr9	128633319	128633379	chr9.128633319	649.22	.	43547.1	20.449	19.4923	31
chr2	96271188	96271231	chr2b.2271188	648.356	.	43489.2	24.521	23.4783	12
chr5	179836464	179836559	chr5b.95836464	646.637	.	43373.9	31.9514	30.811	38
chr4	17811052	17811074	chr4.17811052	645.656	.	43308.1	12.022	11.3295	3
chr5	467190	467231	chr5.467190	645.495	.	43297.3	23.3271	22.3107	0
chr5	72198595	72198697	chr5.72198595	644.608	.	43237.8	34.2472	33.0525	10
chr9	98087172	98087300	chr9.98087172	644.006	.	43197.4	42.7661	40.4774	49
chr6	36231079	36231133	chr6.36231079	642.468	.	43094.3	18.471	17.5689	35
chr11	62881136	62881172	chr11.62881136	641.34	.	43018.6	20.3449	19.3975	15
chr5	73448672	73448704	chr5.73448672	641.232	.	43011.3	17.962	17.072	7
chr2	96297503	96297526	chr2b.2297503	640.264	.	42946.4	12.6146	11.9004	21
chr20	50082300	50082410	chr20.50082300	639.326	.	42883.4	36.8697	35.5179	55
chr14	21393760	21393803	chr14.21393760	638.789	.	42847.5	24.521	23.4783	29
chr2	74493097	74493142	chr2.74493097	638.207	.	42808.4	25.7153	24.6519	0
chr7	55206606	55206697	chr7.55206606	633.017	.	42460.3	30.639	29.5195	32
chrX	153861936	153862053	chrX.153861936	632.953	.	42456	39.1633	37.6912	48
chr17	81510545	81510676	chr17.81510545	630.976	.	42323.4	43.7483	41.431	51
chr12	6866013	6866063	chr12.6866013	630.914	.	42319.2	17.1508	16.2804	22
chr1	156935706	156935767	chr1b.31935706	628.436	.	42153	20.7784	19.8202	0
chr6	73518745	73518772	chr6.73518745	628.37	.	42148.6	14.9883	14.1694	0
chr7	139716722	139716920	chr7.139716722	628.138	.	42133.1	65.6623	62.4184	166
chr17	76737076	76737122	chr17.76737076	626.945	.	42053	26.3126	25.2407	9
chr13	98395397	98395440	chr13.98395397	626.066	.	41994	24.521	23.4783	23
chr2	26778602	26778660	chr2.26778602	625.392	.	41948.9	19.79	18.8473	7
chr3	33866452	33866500	chr3.33866452	622.308	.	41742	27.5075	26.417	17
chr9	128177631	128177679	chr9.128177631	622.256	.	41738.5	27.5075	26.417	20
chr14	24157915	24157973	chr14.24157915	621.833	.	41710.1	19.7899	18.8473	27
chr5	1798713	1798757	chr5.1798713	621.311	.	41675.1	25.1181	24.0645	11
chr21	44851490	44851530	chr21.44851490	621.241	.	41670.4	22.7304	21.727	19
chrX	153954235	153954437	chrX.153954235	620.206	.	41601	66.9696	63.6957	20
chr3	185824863	185824897	chr3b.94824863	619.415	.	41547.9	19.1531	18.2327	4
chrX	153952921	153952996	chrX.153952921	618.311	.	41473.9	25.3846	24.3241	47
chr20	34080073	34080165	chr20.34080073	616.366	.	41343.4	30.9672	29.8456	34
chr7	131503610	131503731	chr7.131503610	616.128	.	41327.5	40.4736	38.434	67
chr8	22615762	22615815	chr8.22615762	614.16	.	41195.4	18.1411	17.2426	5
chr2	206056272	206056442	chr2b.112056272	613.901	.	41178	56.5087	53.6072	122
chr11	2397223	2397267	chr11.2397223	613.203	.	41131.2	25.1181	24.0645	25
chr10	95263974	95264011	chr10.95263974	610.406	.	40943.6	20.941	19.9813	16
chr7	98933291	98933330	chr7.98933291	610.339	.	40939.1	22.1338	21.1438	13
chr17	78972033	78972218	chr17.78972033	609.648	.	40892.8	61.4131	58.2794	101
chr3	160400877	160400983	chr3b.69400877	609.231	.	40864.8	35.5586	34.2489	41
chr2	27041398	27041490	chr2.27041398	609.199	.	40862.7	30.9672	29.8456	41
chr3	4983382	4983459	chr3.4983382	608.212	.	40796.5	26.0419	24.9717	3
chr11	6682178	6682268	chr11.6682178	607.355	.	40739	30.3109	29.1928	50
chr6	160105195	160105305	chr6b.75105195	607.138	.	40724.4	36.8697	35.5179	9
chr8	26656575	26656631	chr8.26656575	606.844	.	40704.7	19.1307	18.2123	14
chr7	44708023	44708062	chr7.44708023	606.34	.	40670.9	22.1338	21.1438	16
chr20	63933354	63933439	chr20.63933354	606.281	.	40667	28.6696	27.5631	66
chrX	154019307	154019348	chrX.154019307	605.8	.	40634.7	14.1747	13.3863	14
chr9	130885866	130885906	chr9.130885866	604.026	.	40515.7	22.7304	21.727	9
chr3	123733715	123733870	chr3b.32733715	603.984	.	40512.9	51.6026	48.9096	130
chr10	113165581	113165704	chr10.113165581	603.929	.	40509.2	41.1287	38.9018	23
chr3	52405152	52405199	chr3.52405152	603.724	.	40495.5	26.91	25.8284	6
chr20	43702574	43702646	chr20.43702574	603.611	.	40487.9	24.3983	23.3574	17
chr10	71816704	71816752	chr10.71816704	602.967	.	40444.7	27.5075	26.417	35
chr11	65428743	65428791	chr11.65428743	602.893	.	40439.7	27.5075	26.417	33
chr8	144311990	144312052	chr8.144311990	602.735	.	40429.1	21.1077	20.1366	21
chr8	23297935	23297976	chr8.23297935	602.461	.	40410.7	23.3271	22.3107	2
chr10	75399070	75399267	chr10.75399070	600.289	.	40265	65.35	62.1156	45
chr6	139373523	139373546	chr6b.54373523	600.191	.	40258.4	12.6146	11.9004	0
chr9	131174193	131174243	chr9.131174193	600.173	.	40257.2	17.1508	16.2804	20
chr8	29337031	29337077	chr8.29337031	598.655	.	40155.4	26.3126	25.2407	0
chr1	1014352	1014401	chr1.1014352	598.517	.	40146.1	28.1051	27.0058	14
chr3	127604941	127604979	chr3b.36604941	597.773	.	40096.3	21.5374	20.5613	3
chr7	76302740	76302766	chr7.76302740	596.704	.	40024.6	14.3944	13.6005	0
chrX	154435318	154435385	chrX.154435318	596.358	.	40001.3	22.7537	21.7402	11
chrX	154400765	154400799	chrX.154400765	595.993	.	39976.9	19.1531	18.2327	11
chr12	49128461	49128496	chr12.49128461	595.807	.	39964.4	19.7489	18.8154	16
chr11	102110884	102111044	chr11.102110884	595.606	.	39950.9	53.2382	50.4516	46
chr10	73797925	73797972	chr10.73797925	595.574	.	39948.8	26.91	25.8284	19
chrX	153870483	153870529	chrX.153870483	594.665	.	39887.8	26.3126	25.2407	15
chrX	154364683	154364706	chrX.154364683	592.772	.	39760.8	12.6146	11.9004	12
chr2	235042655	235042699	chr2b.141042655	592.655	.	39753	25.1181	24.0645	27
chr13	26222060	26222083	chr13.26222060	591.05	.	39645.3	12.6146	11.9004	7
chr1	39413953	39414035	chr1.39413953	590.038	.	39577.5	27.6845	26.5886	75
chrX	73843005	73843046	chrX.73843005	588.681	.	39486.4	23.3271	22.3107	0
chr5	150399959	150400008	chr5b.66399959	588.595	.	39480.6	28.1051	27.0058	7
chr22	37805533	37805584	chr22.37805533	587.793	.	39426.8	17.481	16.5977	22
chr8	142735440	142735520	chr8.142735440	587.376	.	39398.9	27.0276	25.9408	76
chr10	71816561	71816640	chr10.71816561	587.186	.	39386.1	26.699	25.6186	36
chr6	107070760	107070842	chr6b.22070760	586.705	.	39353.9	27.6846	26.5886	52
chr16	56431229	56431275	chr16.56431229	585.886	.	39298.9	26.3126	25.2407	21
chr12	6770761	6770788	chr12.6770761	585.811	.	39293.9	14.9883	14.1694	8
chr12	6942096	6942161	chr12.6942096	585.06	.	39243.5	22.0955	21.1072	49
chr1	156114778	156114839	chr1b.31114778	582.774	.	39090.2	20.7784	19.8202	0
chr12	48937591	48937637	chr12.48937591	582.289	.	39057.7	26.3126	25.2407	13
chr9	127505605	127505716	chr9.127505605	582.093	.	39044.5	37.1974	35.8404	75
chr11	66858081	66858275	chr11.66858081	581.444	.	39001	64.355	61.1568	24
chr1	207752200	207752244	chr1b.82752200	580.106	.	38911.3	25.1181	24.0645	21
chr15	88899361	88899403	chr15.88899361	579.928	.	38899.3	23.924	22.8943	12
chr5	173317415	173317457	chr5b.89317415	579.255	.	38854.1	23.924	22.8943	9
chr13	29514356	29514393	chr13.29514356	578.946	.	38833.4	20.941	19.9813	0
chr2	28393130	28393300	chr2.28393130	577.416	.	38730.8	56.5087	53.6072	45
chr3	50259055	50259088	chr3.50259055	577.123	.	38711.1	18.5575	17.6525	6
chrX	49038272	49038337	chrX.49038272	576.731	.	38684.8	22.0955	21.1072	4
chr2	158625118	158625166	chr2b.64625118	576.615	.	38677.1	27.5075	26.417	15
chr2	241633269	241633313	chr2b.147633269	576.418	.	38663.8	25.1181	24.0645	20
chr11	67398435	67398516	chr11.67398435	575.959	.	38633.1	27.356	26.2677	0
chrX	130081411	130081465	chrX.130081411	575.832	.	38624.5	18.471	17.5689	0
chr16	2763040	2763280	chr16.2763040	575.772	.	38620.5	79.3847	75.7663	20
chr7	139583859	139583902	chr7.139583859	575.621	.	38610.4	24.521	23.4783	21
chr8	22619215	22619270	chr8.22619215	575.369	.	38593.5	18.8009	17.8851	8
chr7	55472885	55472915	chr7.55472885	574.83	.	38557.3	16.7718	15.9116	9
chr2	20203984	20204107	chr2.20203984	574.116	.	38509.5	41.1287	38.9018	70
chr3	184171059	184171139	chr3b.93171059	572.822	.	38422.6	27.0276	25.9408	21
chr3	9702140	9702211	chr3.9702140	572.718	.	38415.7	24.0696	23.0302	25
chr11	65444720	65444960	chr11.65444720	572.393	.	38393.9	79.3847	75.7663	84
chr9	131495881	131495910	chr9.131495881	572.179	.	38379.5	10.1867	9.66905	0
chr1	85580958	85581004	chr1.85580958	571.489	.	38333.2	26.3126	25.2407	1
chr8	144429110	144429179	chr8.144429110	569.671	.	38211.3	23.4117	22.3858	32
chr3	47875790	47875831	chr3.47875790	568.713	.	38147	23.3271	22.3107	9
chr2	28751896	28751932	chr2.28751896	568.651	.	38142.9	20.3449	19.3975	19
chr3	160514952	160514981	chr3b.69514952	568.602	.	38139.6	16.1771	15.3264	6
chr1	153607383	153607448	chr1b.28607383	568.436	.	38128.5	22.0955	21.1072	11
chrX	154019453	154019590	chrX.154019453	567.541	.	38068.4	45.7125	43.3081	4
chr15	74836692	74836741	chr15.74836692	563.953	.	37827.8	16.8207	15.9528	24
chr4	1693507	1693532	chr4.1693507	563.189	.	37776.5	13.8008	13.0317	4
chr1	161160852	161160958	chr1b.36160852	562.323	.	37718.5	35.5586	34.2489	42
chr1	150473243	150473350	chr1b.25473243	560.624	.	37604.4	35.8864	34.5455	50
chr9	93557886	93557929	chr9.93557886	559.615	.	37536.8	24.521	23.4783	18
chr5	41918710	41918760	chr5.41918710	558.854	.	37485.7	17.1508	16.2804	24
chr6	158092967	158092993	chr6b.73092967	558.345	.	37451.6	14.3944	13.6005	16
chr14	22981979	22982159	chr14.22981979	558.095	.	37434.9	59.7785	56.7326	5
chr3	52529187	52529231	chr3.52529187	557.538	.	37397.5	25.1181	24.0645	20
chr1	145826897	145826924	chr1b.20826897	557.158	.	37371.9	14.9883	14.1694	0
chr1	154962945	154963021	chr1b.29962945	557.071	.	37366.1	25.7132	24.6511	25
chr4	77048449	77048473	chr4.77048449	556.308	.	37314.9	13.2075	12.4588	11
chr3	57597235	57597263	chr3.57597235	555.477	.	37259.2	15.5826	14.7463	1
chr7	135977201	135977243	chr7.135977201	555.368	.	37251.9	23.924	22.8943	20
chr11	33710075	33710119	chr11.33710075	554.556	.	37197.5	25.1181	24.0645	20
chr14	23065803	23065906	chr14.23065803	554.545	.	37196.7	34.5752	33.3781	52
chr10	100362754	100362791	chr10.100362754	553.799	.	37146.7	20.941	19.9813	13
chr6	109382277	109382304	chr6b.24382277	553.515	.	37127.6	14.9883	14.1694	0
chr5	141573865	141573901	chr5b.57573865	552.132	.	37034.8	20.3449	19.3975	15
chr22	42615314	42615345	chr22.42615314	551.695	.	37005.6	17.3668	16.4918	0
chr1	156250057	156250101	chr1b.31250057	551.661	.	37003.2	25.1181	24.0645	22
chr21	31731896	31731976	chr21.31731896	551.109	.	36966.3	27.0275	25.9408	23
chrX	3822449	3822499	chrX.3822449	550.298	.	36911.8	17.151	16.2804	37
chr14	90405691	90405736	chr14.90405691	548.761	.	36808.7	25.7153	24.6519	38
chr5	173321387	173321426	chr5b.89321387	546.608	.	36664.3	22.1338	21.1438	22
chr7	99365940	99365983	chr7.99365940	546.461	.	36654.5	14.8368	14.0231	1
chr7	98281912	98281952	chr7.98281912	546.2	.	36637	22.7304	21.727	14
chrX	47241339	47241406	chrX.47241339	544.473	.	36521.1	22.7537	21.7402	31
chrX	56729375	56729428	chrX.56729375	543.776	.	36474.4	18.1411	17.2426	24
chr13	45969129	45969175	chr13.45969129	543.323	.	36444	26.3126	25.2407	7
chr3	52524440	52524479	chr3.52524440	543.298	.	36442.3	22.1338	21.1438	20
chr12	122982659	122982826	chr12.122982659	543.043	.	36425.2	55.5276	52.6679	0
chr2	27409380	27409429	chr2.27409380	541.774	.	36340.1	28.1051	27.0058	6
chr2	237414072	237414117	chr2b.143414072	541.284	.	36307.2	25.7153	24.6519	21
chr20	62308111	62308156	chr20.62308111	540.688	.	36267.2	25.7153	24.6519	33
chr6	166411990	166412025	chr6b.81411990	540.349	.	36244.5	12.1845	11.4813	14
chr6	111661626	111661716	chr6b.26661626	539.443	.	36183.7	30.3109	29.1928	35
chr2	95087289	95087329	chr2b.1087289	538.794	.	36140.2	22.7304	21.727	20
chr8	41509661	41509686	chr8.41509661	538.574	.	36125.4	13.8008	13.0317	8
chr20	31665841	31665933	chr20.31665841	538.19	.	36099.7	30.9672	29.8456	68
chr2	96343227	96343268	chr2b.2343227	537.851	.	36077	23.3271	22.3107	29
chr5	31526650	31526689	chr5.31526650	536.016	.	35953.8	22.1338	21.1438	16
chr2	85609503	85609556	chr2.85609503	535.68	.	35931.3	18.1411	17.2426	32
chr7	102473525	102473563	chr7.102473525	534.142	.	35828.2	21.5374	20.5613	8
chr4	70993698	70993882	chr4.70993698	533.928	.	35813.8	61.0862	57.9672	142
chr3	186787673	186787720	chr3b.95787673	532.494	.	35717.6	26.91	25.8284	7
chr1	231528738	231528783	chr1b.106528738	532.383	.	35710.2	25.7153	24.6519	15
chr16	30710072	30710119	chr16.30710072	532.205	.	35698.2	26.91	25.8284	26
chr12	52170947	52171090	chr12.52170947	531.144	.	35627	47.6763	45.1683	54
chr2	240568942	240569080	chr2b.146568942	530.097	.	35556.8	46.0399	43.6183	8
chrX	154483780	154483828	chrX.154483780	529.608	.	35524	27.5075	26.417	0
chr6	139374484	139374520	chr6b.54374484	529.258	.	35500.6	20.3449	19.3975	15
chr2	219221171	219221212	chr2b.125221171	528.783	.	35468.7	23.3271	22.3107	3
chr9	128256374	128256411	chr9.128256374	527.481	.	35381.3	20.941	19.9813	6
chr2	238451011	238451055	chr2b.144451011	527.248	.	35365.8	25.1181	24.0645	0
chr6	108260788	108260810	chr6b.23260788	526.931	.	35344.5	12.022	11.3295	21
chr8	144516342	144516442	chr8.144516342	526.247	.	35298.6	33.5914	32.4077	38
chr21	43982973	43983008	chr21.43982973	525.934	.	35277.6	19.7489	18.8154	0
chr8	144311577	144311597	chr8.144311577	525.441	.	35244.5	10.8384	10.2364	9
chr1	201782360	201782547	chr1b.76782360	525.096	.	35221.4	62.0669	58.9179	87
chr3	48469394	48469434	chr3.48469394	525.04	.	35217.6	22.7304	21.727	9
chr1	27407506	27407554	chr1.27407506	524.081	.	35153.3	27.5075	26.417	14
chr11	65427339	65427687	chr11.65427339	522.988	.	35080	114.644	110.224	72
chr6	44255179	44255218	chr6.44255179	522.863	.	35071.6	22.1338	21.1438	13
chr6	45546976	45547030	chr6.45546976	522.584	.	35052.9	18.471	17.5689	16
chr4	51844186	51844311	chr4.51844186	522.078	.	35019	47.6046	45.0984	0
chr2	64636426	64636481	chr2.64636426	521.957	.	35010.9	18.8009	17.8851	31
chr2	9630404	9630453	chr2.9630404	521.789	.	34999.6	28.1051	27.0058	35
chr12	49040328	49040436	chr12.49040328	521.144	.	34956.3	36.2142	34.8681	47
chr10	100347177	100347205	chr10.100347177	521.103	.	34953.5	15.5826	14.7463	9
chr1	44221218	44221316	chr1.44221218	520.643	.	34922.7	32.9355	31.7873	83
chr14	50944205	50944240	chr14.50944205	520.149	.	34889.6	19.7489	18.8154	24
chr14	74903005	74903050	chr14.74903005	519.887	.	34872	25.7153	24.6519	30
chr15	62840724	62840878	chr15.62840724	519.309	.	34833.2	51.2756	48.5958	12
chr10	93333829	93333881	chr10.93333829	519.29	.	34831.9	17.8111	16.9242	19
chr9	93529463	93529519	chr9.93529463	518.262	.	34763	19.1306	18.2123	21
chrX	153862436	153862481	chrX.153862436	517.8	.	34732	25.7153	24.6519	13
chr1	150625660	150625699	chr1b.25625660	516.018	.	34612.5	13.512	12.7462	34
chr5	138168506	138168550	chr5b.54168506	514.859	.	34534.8	25.1181	24.0645	13
chrX	154362129	154362145	chrX.154362129	514.537	.	34513.1	8.4779	8.14119	9
chr1	171532376	171532417	chr1b.46532376	513.442	.	34439.7	23.3271	22.3107	0
chr6	36968501	36968544	chr6.36968501	513.258	.	34427.3	24.521	23.4783	27
chr5	173320187	173320385	chr5b.89320187	512.606	.	34383.6	65.6623	62.4184	145
chr3	45224894	45225058	chr3.45224894	511.062	.	34280	54.5465	51.7175	3
chr3	47410812	47410901	chr3.47410812	510.547	.	34245.5	29.9827	28.8665	26
chr15	64137604	64137657	chr15.64137604	510.212	.	34223	18.1411	17.2426	16
chr15	64963114	64963145	chr15.64963114	510.092	.	34215	17.3668	16.4918	3
chr13	29514169	29514236	chr13.29514169	509.685	.	34187.6	22.7537	21.7402	19
chr10	102107707	102107787	chr10.102107707	509.514	.	34176.2	27.0275	25.9408	23
chr4	82429337	82429377	chr4.82429337	509.439	.	34171.1	22.7304	21.727	17
chr4	1338560	1338597	chr4.1338560	507.895	.	34067.6	20.941	19.9813	19
chr16	28834575	28834624	chr16.28834575	507.702	.	34054.6	28.1051	27.0058	9
chr11	35806478	35806522	chr11.35806478	507.422	.	34035.9	25.1181	24.0645	8
chr13	79481393	79481442	chr13.79481393	506.675	.	33985.7	16.8209	15.9528	24
chrX	153870828	153870847	chrX.153870828	506.541	.	33976.8	10.2473	9.7254	9
chr2	36513619	36513666	chr2.36513619	506.413	.	33968.2	26.91	25.8284	45
chr10	101002829	101002878	chr10.101002829	506.408	.	33967.9	28.1051	27.0058	24
chr13	20988508	20988543	chr13.20988508	506.314	.	33961.6	19.7489	18.8154	4
chr5	10353779	10353847	chr5.10353779	505.71	.	33921	23.0828	22.0679	2
chr9	125240745	125240765	chr9.125240745	505.11	.	33880.8	10.8384	10.2364	6
chr6	27892825	27892968	chr6.27892825	504.48	.	33838.5	47.6763	45.1683	31
chr22	38221510	38221553	chr22.38221510	504.292	.	33825.9	24.521	23.4783	20
chr1	36171111	36171250	chr1.36171111	504.287	.	33825.6	46.3671	43.9324	90
chr4	1813989	1814028	chr4.1813989	504.233	.	33821.9	22.1338	21.1438	6
chr13	39013995	39014032	chr13.39013995	503.857	.	33796.8	20.941	19.9813	18
chr1	26731225	26731290	chr1.26731225	503.533	.	33775	22.0955	21.1072	38
chr16	28836041	28836105	chr16.28836041	502.637	.	33714.9	21.7663	20.7795	52
chr13	110462310	110462337	chr13.110462310	502.518	.	33706.9	14.9883	14.1694	0
chr7	44766460	44766502	chr7.44766460	501.065	.	33609.5	23.924	22.8943	14
chr12	115991628	115991693	chr12.115991628	499.702	.	33518.1	22.0956	21.1072	29
chr8	22574846	22574896	chr8.22574846	499.224	.	33486	17.1509	16.2804	37
chr2	97792446	97792493	chr2b.3792446	499.172	.	33482.5	26.91	25.8284	3
chr5	154803583	154803634	chr5b.70803583	498.733	.	33453.1	17.481	16.5977	26
chr9	76503361	76503395	chr9.76503361	498.719	.	33452.1	19.1531	18.2327	12
chr4	2248300	2248394	chr4.2248300	498.374	.	33429	31.6234	30.4861	0
chr9	127523767	127523795	chr9.127523767	498.273	.	33422.2	15.5826	14.7463	8
chr1	119925535	119925571	chr1.119925535	497.883	.	33396	20.3449	19.3975	19
chr2	226797508	226797659	chr2b.132797508	497.862	.	33394.6	50.294	47.6545	5
chr1	36286960	36287032	chr1.36286960	497.236	.	33352.6	24.3984	23.3574	33
chr3	123700782	123700823	chr3b.32700782	497.18	.	33348.9	23.3271	22.3107	18
chr12	98594079	98594127	chr12.98594079	496.059	.	33273.7	27.5075	26.417	32
chr11	62533339	62533384	chr11.62533339	495.506	.	33236.6	25.7153	24.6519	31
chr3	9890691	9890730	chr3.9890691	495.428	.	33231.4	22.1338	21.1438	17
chr2	43226290	43226333	chr2.43226290	494.311	.	33156.4	24.521	23.4783	31
chrX	154531479	154531514	chrX.154531479	494.071	.	33140.3	19.7489	18.8154	0
chr20	35277584	35277647	chr20.35277584	491.336	.	32956.9	21.437	20.4625	41
chr1	149842483	149842563	chr1b.24842483	490.626	.	32909.3	30.7538	29.6331	28
chr1	94174188	94174234	chr1.94174188	489.938	.	32863.1	26.3126	25.2407	11
chr6	113859833	113859860	chr6b.28859833	489.239	.	32816.2	14.9883	14.1694	0
chr10	102657194	102657233	chr10.102657194	489.02	.	32801.6	22.1338	21.1438	11
chr4	17614690	17614732	chr4.17614690	488.83	.	32788.8	23.924	22.8943	1
chr15	51909627	51909675	chr15.51909627	488.731	.	32782.2	27.5075	26.417	5
chrX	10220713	10220752	chrX.10220713	487.4	.	32692.9	22.1338	21.1438	26
chr7	99458244	99458286	chr7.99458244	487.283	.	32685	14.5058	13.6973	23
chr3	47852326	47852392	chr3.47852326	487.07	.	32670.8	22.4246	21.4231	57
chr14	68789241	68789341	chr14.68789241	487.057	.	32669.8	33.5914	32.4077	41
chr7	75888101	75888163	chr7.75888101	486.351	.	32622.5	21.1077	20.1366	19
chrX	154362472	154362497	chrX.154362472	486.214	.	32613.3	8.84943	8.48305	3
chr13	37022147	37022223	chr13.37022147	485.58	.	32570.8	25.7134	24.6511	0
chr19	49490275	49490320	chr19.49490275	483.614	.	32438.9	25.7153	24.6519	19
chr6	44253636	44253690	chr6.44253636	483.5	.	32431.3	18.471	17.5689	28
chr7	150372686	150372728	chr7.150372686	483.498	.	32431.2	23.924	22.8943	15
chr19	46610228	46610368	chr19.46610228	483.23	.	32413.2	46.6944	44.2222	75
chr12	55726955	55726979	chr12.55726955	481.934	.	32326.2	13.2075	12.4588	2
chr22	35424291	35424350	chr22.35424291	481.083	.	32269.2	20.1196	19.1743	38
chr8	144140212	144140274	chr8.144140212	480.867	.	32254.7	21.1077	20.1366	18
chr6	12514221	12514265	chr6.12514221	479.69	.	32175.7	25.1181	24.0645	11
chr7	128651303	128651329	chr7.128651303	479.425	.	32158	14.3944	13.6005	11
chr15	40956084	40956140	chr15.40956084	479.336	.	32152	19.1306	18.2123	27
chr17	49404938	49404979	chr17.49404938	478.895	.	32122.4	23.3271	22.3107	17
chr3	128814557	128814602	chr3b.37814557	476.339	.	31950.9	25.7153	24.6519	8
chr9	128166280	128166330	chr9.128166280	476.229	.	31943.6	17.1508	16.2804	34
chr3	49533080	49533144	chr3.49533080	475.604	.	31901.7	21.7663	20.7795	16
chr12	6936592	6936655	chr12.6936592	475.081	.	31866.6	21.437	20.4625	34
chr17	38920481	38920526	chr17.38920481	474.483	.	31826.4	25.7153	24.6519	2
chr5	140245801	140245828	chr5b.56245801	474.365	.	31818.5	14.9883	14.1694	12
chr6	26250438	26250464	chr6.26250438	473.48	.	31759.2	14.3944	13.6005	18
chr8	144435090	144435137	chr8.144435090	471.423	.	31621.2	16.1598	15.3103	0
chr9	98087356	98087474	chr9.98087356	471.398	.	31619.5	39.4909	37.9528	53
chr5	176347598	176347634	chr5b.92347598	470.751	.	31576.1	20.3449	19.3975	18
chr10	80155697	80155721	chr10.80155697	469.97	.	31523.8	13.2075	12.4588	15
chr10	99955532	99955570	chr10.99955532	469.892	.	31518.5	21.5374	20.5613	7
chrX	49174768	49174797	chrX.49174768	469.511	.	31493	16.1771	15.3264	0
chr1	209632673	209632703	chr1b.84632673	469.327	.	31480.6	16.7718	15.9116	21
chr7	152163621	152163680	chr7.152163621	468.422	.	31419.9	20.1195	19.1743	6
chr14	77511909	77511948	chr14.77511909	468.263	.	31409.2	22.1338	21.1438	21
chr17	63703142	63703292	chr17.63703142	467.961	.	31389	49.9668	47.353	74
chr5	176392590	176392617	chr5b.92392590	466.764	.	31308.7	14.9883	14.1694	4
chr14	68882918	68882971	chr14.68882918	466.617	.	31298.8	18.1411	17.2426	18
chr3	51420136	51420191	chr3.51420136	466.595	.	31297.4	18.8009	17.8851	19
chr1	155766064	155766110	chr1b.30766064	465.296	.	31210.2	26.3126	25.2407	11
chr17	7312351	7312393	chr17.7312351	465.201	.	31203.9	23.924	22.8943	36
chr7	100107495	100107570	chr7.100107495	464.827	.	31178.7	25.3846	24.3241	23
chr1	37493965	37494001	chr1.37493965	464.253	.	31140.3	20.3449	19.3975	15
chr8	25412706	25412749	chr8.25412706	462.78	.	31041.5	24.521	23.4783	1
chr17	38919530	38919567	chr17.38919530	462.278	.	31007.8	20.941	19.9813	18
chr15	48645615	48645652	chr15.48645615	461.391	.	30948.3	20.941	19.9813	7
chr15	90953861	90953904	chr15.90953861	460.553	.	30892.1	24.521	23.4783	12
chr1	214551426	214551474	chr1b.89551426	460.325	.	30876.8	27.5075	26.417	6
chr13	113584882	113584941	chr13.113584882	460.191	.	30867.8	20.1195	19.1743	32
chr11	74085756	74085796	chr11.74085756	459.233	.	30803.6	22.7304	21.727	18
chr2	25743979	25744021	chr2.25743979	457.311	.	30674.6	23.924	22.8943	14
chr1	214384141	214384186	chr1b.89384141	457.217	.	30668.3	25.7153	24.6519	7
chr6	87663088	87663122	chr6b.2663088	455.973	.	30584.9	19.1531	18.2327	28
chr6	157200943	157200977	chr6b.72200943	453.393	.	30411.9	19.1531	18.2327	14
chr12	56272201	56272244	chr12.56272201	452.915	.	30379.8	24.521	23.4783	12
chr4	6641092	6641118	chr4.6641092	452.771	.	30370.1	14.3944	13.6005	5
chr21	31694880	31694907	chr21.31694880	450.823	.	30239.4	14.9883	14.1694	3
chr6	43020736	43020783	chr6.43020736	450.808	.	30238.4	26.91	25.8284	26
chr1	147620598	147620649	chr1b.22620598	450.693	.	30230.7	17.481	16.5977	11
chr18	35140656	35140704	chr18.35140656	450.668	.	30229	27.5075	26.417	26
chr4	1212935	1212989	chr4.1212935	450.579	.	30223	18.4711	17.5689	28
chr6	89352573	89352635	chr6b.4352573	450.402	.	30211.2	21.1078	20.1366	0
chr9	35076474	35076521	chr9.35076474	450.389	.	30210.3	26.91	25.8284	21
chr1	151067514	151067556	chr1b.26067514	449.918	.	30178.7	23.924	22.8943	23
chr12	118043199	118043244	chr12.118043199	449.594	.	30157	25.7153	24.6519	13
chr4	2514131	2514240	chr4.2514131	449.457	.	30147.8	36.5419	35.1921	0
chr2	219443307	219443347	chr2b.125443307	446.711	.	29963.6	22.7304	21.727	11
chrX	153700837	153700865	chrX.153700837	446.585	.	29955.2	15.5826	14.7463	8
chr11	67398283	67398323	chr11.67398283	446.162	.	29926.8	22.7304	21.727	9
chr20	50582729	50582773	chr20.50582729	445.436	.	29878.1	25.1181	24.0645	16
chr13	113838143	113838181	chr13.113838143	445.054	.	29852.5	21.5374	20.5613	21
chr1	110340787	110341031	chr1.110340787	443.673	.	29759.8	80.6913	76.9702	39
chr3	36992916	36992954	chr3.36992916	443.045	.	29717.7	21.5374	20.5613	14
chr5	138344870	138344989	chr5b.54344870	442.84	.	29704	39.8186	38.2076	0
chr3	9448525	9448567	chr3.9448525	442.4	.	29674.5	23.924	22.8943	20
chr20	33676227	33676266	chr20.33676227	441.141	.	29590	22.1338	21.1438	10
chr7	149003724	149003759	chr7.149003724	440.663	.	29557.9	19.7489	18.8154	9
chr2	96252655	96252805	chr2b.2252655	440.354	.	29537.2	49.9668	47.353	27
chr21	44324529	44324573	chr21.44324529	440.089	.	29519.5	15.1679	14.3365	13
chr2	55050377	55050423	chr2.55050377	440.066	.	29517.9	26.3126	25.2407	2
chr19	50798510	50798559	chr19.50798510	439.752	.	29496.9	28.1051	27.0058	12
chr1	151287010	151287135	chr1b.26287010	439.226	.	29461.6	41.7837	39.5378	62
chr2	240464648	240464689	chr2b.146464648	439.225	.	29461.5	23.3271	22.3107	3
chr4	102613515	102613557	chr4b.18613515	438.979	.	29445	23.924	22.8943	9
chr1	160358513	160358654	chr1b.35358513	438.339	.	29402	47.0217	44.5345	84
chr7	99419497	99419537	chr7.99419497	438.134	.	29388.3	22.7304	21.727	10
chr12	113260386	113260429	chr12.113260386	437.608	.	29353	24.521	23.4783	18
chr3	127618973	127619042	chr3b.36618973	437.205	.	29326	23.4118	22.3858	0
chr3	23918470	23918497	chr3.23918470	437.078	.	29317.5	14.9883	14.1694	0
chr11	47165220	47165248	chr11.47165220	437.022	.	29313.7	15.5826	14.7463	26
chr12	109110408	109110461	chr12.109110408	436.733	.	29294.3	18.1411	17.2426	21
chr7	72925702	72925745	chr7.72925702	436.039	.	29247.8	24.521	23.4783	12
chr7	1815948	1815982	chr7.1815948	435.654	.	29222	19.1531	18.2327	0
chr13	46592983	46593021	chr13.46592983	435.102	.	29184.9	21.5374	20.5613	3
chr3	120396517	120396574	chr3b.29396517	434.985	.	29177.1	19.4603	18.5296	35
chr8	29069870	29069925	chr8.29069870	434.77	.	29162.7	21.363	20.3894	1
chr19	1440400	1440443	chr19.1440400	434.499	.	29144.5	24.521	23.4783	8
chr2	87521242	87521290	chr2.87521242	434.305	.	29131.4	27.5075	26.417	19
chr11	65920642	65920679	chr11.65920642	434.005	.	29111.4	20.941	19.9813	12
chrX	153952782	153952849	chrX.153952782	433.866	.	29102	22.7537	21.7402	38
chr1	247298850	247298901	chr1b.122298850	433.859	.	29101.6	17.481	16.5977	16
chr13	113243016	113243043	chr13.113243016	433.603	.	29084.4	14.9883	14.1694	0
chr2	226797259	226797343	chr2b.132797259	433.387	.	29069.9	28.3413	27.2371	33
chr21	45175897	45175942	chr21.45175897	432.746	.	29026.9	25.7153	24.6519	9
chr2	219540201	219540246	chr2b.125540201	432.688	.	29023	25.7153	24.6519	0
chr1	151581724	151581780	chr1b.26581724	432.579	.	29015.7	19.1306	18.2123	3
chr1	44650766	44650815	chr1.44650766	432.067	.	28981.4	28.1051	27.0058	24
chrX	154531836	154531876	chrX.154531836	432.013	.	28977.7	22.7304	21.727	6
chr9	33166866	33166905	chr9.33166866	431.371	.	28934.7	22.1338	21.1438	27
chr5	143223061	143223124	chr5b.59223061	431.062	.	28913.9	21.437	20.4625	32
chrX	40654420	40654459	chrX.40654420	430.738	.	28892.2	22.1338	21.1438	31
chr7	2663654	2663755	chr7.2663654	430.641	.	28885.7	33.9193	32.7297	41
chr6	157672922	157672965	chr6b.72672922	429.968	.	28840.6	24.521	23.4783	27
chr1	165728023	165728061	chr1b.40728023	429.494	.	28808.7	21.5374	20.5613	25
chr11	46320889	46321014	chr11.46320889	429.289	.	28795	41.7837	39.5378	10
chr2	218638517	218638556	chr2b.124638517	429.002	.	28775.7	22.1338	21.1438	4
chr3	155080353	155080414	chr3b.64080353	428.849	.	28765.5	20.7784	19.8202	35
chr20	5119618	5119650	chr20.5119618	428.837	.	28764.7	17.962	17.072	11
chr7	143388314	143388354	chr7.143388314	428.745	.	28758.5	22.7304	21.727	14
chr15	96331910	96331950	chr15.96331910	428.62	.	28750.1	22.7304	21.727	7
chr12	2858019	2858057	chr12.2858019	428.546	.	28745.2	21.5374	20.5613	9
chr11	35231042	35231089	chr11.35231042	428.498	.	28742	26.91	25.8284	13
chr15	59136897	59136931	chr15.59136897	428.284	.	28727.6	19.1531	18.2327	6
chr5	77074140	77074173	chr5.77074140	427.909	.	28702.5	18.5575	17.6525	8
chr3	23917968	23917993	chr3.23917968	427.853	.	28698.7	13.8008	13.0317	1
chr7	131501899	131502009	chr7.131501899	427.743	.	28691.3	36.8697	35.5179	59
chr1	32173949	32173998	chr1.32173949	427.41	.	28669	28.1051	27.0058	21
chr10	3781707	3781751	chr10.3781707	426.298	.	28594.4	25.1181	24.0645	0
chrX	53433785	53433835	chrX.53433785	426.248	.	28591	17.1508	16.2804	0
chr21	45531710	45531760	chr21.45531710	425.936	.	28570.1	17.151	16.2804	13
chr12	56349005	56349050	chr12.56349005	425.49	.	28540.2	25.7153	24.6519	31
chr2	219182339	219182412	chr2b.125182339	425.394	.	28533.7	24.7272	23.6763	48
chr17	81511949	81511978	chr17.81511949	425.175	.	28519	16.1771	15.3264	9
chr9	33112148	33112190	chr9.33112148	425.007	.	28507.8	23.924	22.8943	10
chr1	112701270	112701450	chr1.112701270	424.577	.	28478.9	59.7785	56.7326	0
chr3	50355262	50355348	chr3.50355262	424.558	.	28477.7	28.9979	27.8896	0
chr5	134661435	134661479	chr5b.50661435	424.34	.	28463.1	25.1181	24.0645	0
chr3	141447144	141447166	chr3b.50447144	424.307	.	28460.9	12.022	11.3295	11
chr21	35006100	35006174	chr21.35006100	423.787	.	28426	28.5028	27.3975	9
chr1	149926017	149926049	chr1b.24926017	423.351	.	28396.7	17.962	17.072	17
chr8	22605787	22605829	chr8.22605787	423.281	.	28392	14.5062	13.6973	25
chr4	867101	867153	chr4.867101	422.987	.	28372.3	17.8111	16.9242	27
chr13	44434666	44434710	chr13.44434666	422.85	.	28363.1	15.1679	14.3365	21
chr4	851824	851865	chr4.851824	422.028	.	28308	23.3271	22.3107	0
chr7	2662402	2662498	chr7.2662402	421.173	.	28250.7	32.2795	31.1359	68
chr20	50081861	50081904	chr20.50081861	420.832	.	28227.8	24.521	23.4783	15
chr3	134371191	134371237	chr3b.43371191	420.587	.	28211.4	26.3126	25.2407	12
chr20	25248331	25248364	chr20.25248331	420.371	.	28196.8	18.5575	17.6525	6
chr3	184261141	184261184	chr3b.93261141	420.014	.	28172.9	24.521	23.4783	34
chr9	128808490	128808666	chr9.128808490	419.935	.	28167.6	58.4707	55.5325	120
chr2	226796923	226796995	chr2b.132796923	419.843	.	28161.4	24.3983	23.3574	33
chr2	218638381	218638438	chr2b.124638381	419.598	.	28145	19.4603	18.5296	28
chr16	28835661	28835711	chr16.28835661	418.531	.	28073.4	17.1508	16.2804	2
chrX	53588425	53588457	chrX.53588425	418.489	.	28070.6	11.1866	10.5394	0
chr14	103491912	103491954	chr14.103491912	418.488	.	28070.5	23.924	22.8943	15
chr10	101579202	101579256	chr10.101579202	418.414	.	28065.6	18.4712	17.5689	17
chr9	128907392	128907423	chr9.128907392	418.361	.	28062	17.3668	16.4918	15
chr12	2874173	2874268	chr12.2874173	417.597	.	28010.8	31.9515	30.811	7
chr5	149551007	149551058	chr5b.65551007	417.488	.	28003.5	17.481	16.5977	9
chr15	68291355	68291401	chr15.68291355	417.233	.	27986.3	17.9719	17.0739	18
chrX	54470342	54470379	chrX.54470342	415.669	.	27881.4	20.941	19.9813	0
chr8	127922691	127922734	chr8.127922691	414.194	.	27782.5	14.8368	14.0231	14
chr8	143921175	143921204	chr8.143921175	414.165	.	27780.5	10.187	9.66905	10
chr5	10680995	10681027	chr5.10680995	413.88	.	27761.4	17.962	17.072	14
chr14	22877053	22877146	chr14.22877053	413.548	.	27739.2	31.2953	30.1672	33
chrX	154350629	154350768	chrX.154350629	413.534	.	27738.2	46.3672	43.9324	26
chr17	81510709	81510828	chr17.81510709	412.925	.	27697.4	39.8185	38.2076	82
chr6	52500952	52500972	chr6.52500952	412.673	.	27680.5	10.8384	10.2364	11
chr12	98601445	98601481	chr12.98601445	411.291	.	27587.8	20.3449	19.3975	12
chr15	75677331	75677415	chr15.75677331	411.227	.	27583.5	28.3412	27.2371	44
chr10	102141084	102141156	chr10.102141084	410.643	.	27544.3	24.3983	23.3574	27
chr16	18838043	18838111	chr16.18838043	410.282	.	27520.1	23.0828	22.0679	35
chr8	144393946	144393976	chr8.144393946	409.915	.	27495.5	16.7718	15.9116	0
chr1	167790442	167790499	chr1b.42790442	409.199	.	27447.5	19.4603	18.5296	24
chr10	72013173	72013214	chr10.72013173	408.751	.	27417.4	14.1746	13.3863	19
chr9	136850850	136850908	chr9.136850850	408.481	.	27399.3	19.7899	18.8473	36
chr6	143765549	143765593	chr6b.58765549	408.198	.	27380.3	15.1681	14.3365	30
chr15	75206432	75206471	chr15.75206432	408.179	.	27379.1	22.1338	21.1438	0
chr14	21492919	21492995	chr14.21492919	408.028	.	27368.9	25.7132	24.6511	23
chr8	144360194	144360316	chr8.144360194	407.886	.	27359.4	40.8012	38.5924	20
chr6	26204650	26204678	chr6.26204650	407.395	.	27326.5	15.5826	14.7463	8
chr5	128263510	128263553	chr5b.44263510	407.285	.	27319.1	24.521	23.4783	9
chr11	65430254	65430298	chr11.65430254	407.182	.	27312.2	25.1181	24.0645	16
chr7	75422296	75422342	chr7.75422296	406.802	.	27286.7	26.3126	25.2407	0
chr1	149926430	149926457	chr1b.24926430	406.428	.	27261.6	14.9883	14.1694	3
chr8	143916135	143916167	chr8.143916135	406.055	.	27236.6	17.962	17.072	16
chrX	53380014	53380067	chrX.53380014	405.669	.	27210.7	18.1411	17.2426	19
chr1	956115	956214	chr1.956115	405.349	.	27189.2	33.2635	32.0888	39
chr11	57700012	57700098	chr11.57700012	405.067	.	27170.3	28.9979	27.8896	36
chr11	67438852	67438921	chr11.67438852	404.931	.	27161.2	23.4117	22.3858	22
chrX	154472891	154472944	chrX.154472891	404.672	.	27143.8	18.1411	17.2426	34
chr5	176290204	176290267	chr5b.92290204	404.619	.	27140.3	21.437	20.4625	28
chr10	79298504	79298544	chr10.79298504	404.349	.	27122.1	22.7304	21.727	0
chr6	26123811	26123850	chr6.26123811	403.864	.	27089.6	22.1338	21.1438	27
chr15	72751711	72751841	chr15.72751711	403.296	.	27051.5	43.421	41.117	22
chr6	27867174	27867194	chr6.27867174	402.592	.	27004.3	10.8384	10.2364	0
chr5	147509696	147509886	chr5b.63509696	402.536	.	27000.5	63.0476	59.8747	31
chr20	36779194	36779233	chr20.36779194	402.072	.	26969.4	22.1338	21.1438	30
chr6	110814631	110814734	chr6b.25814631	402.041	.	26967.4	39.3725	37.8975	0
chr12	52170362	52170445	chr12.52170362	401.792	.	26950.6	28.0129	26.915	34
chr5	178147760	178147828	chr5b.94147760	401.422	.	26925.8	23.0827	22.0679	20
chrX	51743779	51743906	chrX.51743779	400.969	.	26895.4	42.4386	40.1564	0
chr13	110507985	110508009	chr13.110507985	400.593	.	26870.2	13.2075	12.4588	0
chr17	81868538	81868748	chr17.81868538	400.316	.	26851.7	69.5839	66.2052	64
chr17	81700786	81700828	chr17.81700786	399.474	.	26795.1	23.924	22.8943	26
chr4	24582806	24582850	chr4.24582806	399.026	.	26765.1	17.2172	16.3428	12
chr15	39581137	39581184	chr15.39581137	398.972	.	26761.5	26.91	25.8284	0
chr12	49031595	49031775	chr12.49031595	398.947	.	26759.8	59.7785	56.7326	37
chr1	154978963	154979018	chr1b.29978963	398.822	.	26751.4	18.8009	17.8851	20
chr7	5527789	5527868	chr7.5527789	398.622	.	26738	26.699	25.6186	76
chr11	58618319	58618352	chr11.58618319	398.337	.	26718.9	18.5575	17.6525	15
chr1	19222701	19222744	chr1.19222701	397.266	.	26647	24.521	23.4783	10
chr2	215375281	215375315	chr2b.121375281	396.701	.	26609.2	19.1531	18.2327	0
chr20	34280950	34280990	chr20.34280950	396.458	.	26592.9	22.7304	21.727	17
chr13	110307502	110307542	chr13.110307502	396.181	.	26574.3	22.7304	21.727	17
chr19	49490526	49490551	chr19.49490526	395.976	.	26560.5	13.8008	13.0317	7
chr4	73141761	73141802	chr4.73141761	395.626	.	26537	23.3271	22.3107	6
chr14	105250195	105250231	chr14.105250195	395.309	.	26515.8	20.3449	19.3975	18
chr4	48420176	48420334	chr4.48420176	394.943	.	26491.2	52.5841	49.8205	141
chr11	65891079	65891118	chr11.65891079	394.714	.	26475.8	22.1338	21.1438	0
chr1	8861252	8861277	chr1.8861252	394.048	.	26431.2	13.8008	13.0317	18
chr14	68878721	68878860	chr14.68878721	393.967	.	26425.8	46.3671	43.9324	39
chr13	29536048	29536144	chr13.29536048	393.664	.	26405.4	32.2795	31.1359	52
chr12	110349924	110349965	chr12.110349924	393.047	.	26364	23.3271	22.3107	0
chr2	96602203	96602230	chr2b.2602203	392.482	.	26326.2	14.9883	14.1694	24
chr12	131986547	131986597	chr12.131986547	392.372	.	26318.7	17.1508	16.2804	16
chr5	66075092	66075131	chr5.66075092	392.028	.	26295.7	22.1338	21.1438	0
chr15	96330882	96330927	chr15.96330882	391.91	.	26287.8	25.7153	24.6519	0
chr2	233288821	233288901	chr2b.139288821	391.465	.	26257.9	27.0275	25.9408	49
chr12	6965565	6965607	chr12.6965565	391.356	.	26250.6	23.924	22.8943	20
chr12	6938930	6938975	chr12.6938930	390.251	.	26176.5	25.7153	24.6519	26
chr22	20953226	20953266	chr22.20953226	389.532	.	26128.3	22.7304	21.727	5
chr8	30352294	30352333	chr8.30352294	389.507	.	26126.6	22.1338	21.1438	19
chr3	134367150	134367197	chr3b.43367150	389.154	.	26102.9	26.91	25.8284	0
chr2	127526320	127526345	chr2b.33526320	389.074	.	26097.6	13.8008	13.0317	1
chr2	61537831	61537869	chr2.61537831	388.09	.	26031.5	21.5374	20.5613	15
chr12	124778437	124778486	chr12.124778437	387.795	.	26011.8	28.1051	27.0058	33
chrX	153948780	153948812	chrX.153948780	387.593	.	25998.2	17.962	17.072	15
chr3	9806988	9807028	chr3.9806988	387.486	.	25991	22.7304	21.727	18
chr11	2403037	2403150	chr11.2403037	387.041	.	25961.2	37.8528	36.4329	50
chr14	102050107	102050148	chr14.102050107	386.308	.	25912	23.3271	22.3107	5
chr8	47961180	47961200	chr8.47961180	385.451	.	25854.6	10.8384	10.2364	0
chr13	113319489	113319516	chr13.113319489	385.097	.	25830.8	14.9883	14.1694	0
chr5	55534594	55534744	chr5.55534594	385.022	.	25825.8	49.9669	47.353	0
chr21	31685131	31685165	chr21.31685131	384.711	.	25804.9	19.1531	18.2327	14
chr1	201488894	201488931	chr1b.76488894	384.63	.	25799.5	20.941	19.9813	0
chr6	56463606	56463645	chr6.56463606	384.375	.	25782.4	22.1338	21.1438	5
chr21	43756687	43756726	chr21.43756687	384.233	.	25772.8	22.1338	21.1438	8
chr6	35575152	35575200	chr6.35575152	383.784	.	25742.7	27.5075	26.417	9
chr21	43867063	43867223	chr21.43867063	381.151	.	25566.1	60.6881	57.5971	0
chr5	177489147	177489244	chr5b.93489147	381.031	.	25558.1	32.6075	31.4615	47
chr16	28836337	28836458	chr16.28836337	380.972	.	25554.1	40.4736	38.434	25
chr7	100886808	100886862	chr7.100886808	380.891	.	25548.7	18.471	17.5689	15
chr15	96334424	96334455	chr15.96334424	379.665	.	25466.4	17.3668	16.4918	17
chr5	141512551	141512591	chr5b.57512551	379.39	.	25448	22.7304	21.727	18
chr14	24164850	24164884	chr14.24164850	379.242	.	25438.1	19.1531	18.2327	14
chr2	130153879	130153919	chr2b.36153879	378.919	.	25416.4	22.7304	21.727	7
chr1	21219000	21219031	chr1.21219000	378.688	.	25400.9	17.3668	16.4918	13
chr5	141654018	141654063	chr5b.57654018	378.624	.	25396.6	25.7153	24.6519	0
chr1	202808140	202808226	chr1b.77808140	378.461	.	25385.7	28.9979	27.8896	32
chr22	38866526	38866623	chr22.38866526	378.092	.	25360.9	32.6075	31.4615	43
chr5	176596517	176596594	chr5b.92596517	377.857	.	25345.1	26.0421	24.9717	0
chr5	6754878	6754923	chr5.6754878	377.52	.	25322.6	25.7153	24.6519	16
chr1	51919854	51919888	chr1.51919854	377.122	.	25295.9	19.1531	18.2327	13
chr14	100835156	100835198	chr14.100835156	377.068	.	25292.3	23.924	22.8943	19
chr3	184164543	184164607	chr3b.93164543	376.995	.	25287.4	21.7665	20.7795	40
chr3	195867712	195867784	chr3b.104867712	376.311	.	25241.5	24.3983	23.3574	30
chr8	41264999	41265047	chr8.41264999	376.196	.	25233.8	27.5075	26.417	9
chr11	74253578	74253616	chr11.74253578	375.991	.	25220	21.5374	20.5613	32
chr1	35192491	35192556	chr1.35192491	375.966	.	25218.3	22.0955	21.1072	38
chr8	144473640	144473722	chr8.144473640	375.704	.	25200.7	27.6845	26.5886	51
chr12	54402049	54402147	chr12.54402049	375.616	.	25194.9	32.9355	31.7873	43
chr11	61967532	61967558	chr11.61967532	375.355	.	25177.4	14.3944	13.6005	10
chr17	57683008	57683074	chr17.57683008	375.113	.	25161.1	22.4246	21.4231	37
chr22	29695750	29695848	chr22.29695750	374.694	.	25133	32.9355	31.7873	57
chr9	123103449	123103494	chr9.123103449	374.038	.	25089	25.7153	24.6519	11
chr1	149842345	149842413	chr1b.24842345	373.544	.	25055.8	26.2503	25.1793	35
chr21	41991792	41991877	chr21.41991792	373.501	.	25053	28.6696	27.5631	9
chr2	240462300	240462364	chr2b.146462300	373.269	.	25037.4	21.7663	20.7795	30
chr9	107306500	107306543	chr9.107306500	373.052	.	25022.9	24.521	23.4783	22
chr4	2928723	2928751	chr4.2928723	372.659	.	24996.5	9.85291	9.37222	0
chr21	44327112	44327184	chr21.44327112	372.61	.	24993.2	24.3983	23.3574	39
chrX	153794711	153794750	chrX.153794711	372.51	.	24986.5	22.1338	21.1438	0
chr2	135645410	135645456	chr2b.41645410	372.322	.	24973.9	26.3126	25.2407	16
chr12	124343103	124343147	chr12.124343103	372.3	.	24972.4	25.1181	24.0645	14
chr1	11273533	11273582	chr1.11273533	372.169	.	24963.7	28.1051	27.0058	19
chr5	61162258	61162405	chr5.61162258	371.998	.	24952.2	48.9853	46.404	15
chr21	46003964	46004023	chr21.46003964	371.508	.	24919.3	20.1196	19.1743	52
chr12	48923479	48923526	chr12.48923479	371.365	.	24909.7	26.91	25.8284	31
chr2	173363874	173363893	chr2b.79363874	371.144	.	24894.9	10.2473	9.7254	0
chr9	124358725	124358763	chr9.124358725	370.764	.	24869.4	21.5374	20.5613	12
chr21	44850504	44850538	chr21.44850504	370.408	.	24845.5	19.1531	18.2327	13
chr2	219540999	219541026	chr2b.125540999	369.995	.	24817.8	14.9883	14.1694	18
chr11	68262500	68262566	chr11.68262500	369.598	.	24791.2	22.4246	21.4231	5
chr17	7513248	7513302	chr17.7513248	369.532	.	24786.8	18.471	17.5689	35
chr6	138432297	138432341	chr6b.53432297	369.335	.	24773.5	25.1181	24.0645	19
chr10	63209108	63209145	chr10.63209108	369.274	.	24769.4	20.941	19.9813	3
chr22	36348955	36349005	chr22.36348955	369.125	.	24759.5	17.1508	16.2804	7
chr6	148544424	148544490	chr6b.63544424	368.699	.	24730.9	22.4249	21.4231	8
chr2	121530938	121530965	chr2b.27530938	368.447	.	24714	14.9883	14.1694	0
chrX	141907808	141907837	chrX.141907808	368.351	.	24707.5	16.1771	15.3264	13
chr7	72947038	72947098	chr7.72947038	368.297	.	24703.9	20.449	19.4923	41
chr21	37197927	37197946	chr21.37197927	367.834	.	24672.9	10.2473	9.7254	0
chr2	101699229	101699301	chr2b.7699229	367.579	.	24655.8	27.7522	26.6547	14
chr5	115842001	115842027	chr5b.31842001	367.469	.	24648.4	14.3944	13.6005	4
chr7	44116166	44116189	chr7.44116166	367.39	.	24643.1	12.6146	11.9004	7
chr6	160048419	160048444	chr6b.75048419	367.257	.	24634.1	13.8008	13.0317	6
chr5	173609287	173609318	chr5b.89609287	367.223	.	24631.9	17.3668	16.4918	0
chr3	49057637	49057676	chr3.49057637	366.819	.	24604.8	22.1338	21.1438	9
chr8	130055779	130055956	chr8.130055779	366.529	.	24585.4	58.7977	55.8299	16
chr7	43869328	43869483	chr7.43869328	366.239	.	24565.9	51.6026	48.9096	0
chr1	33181518	33181647	chr1.33181518	366.092	.	24556	43.0935	40.8027	34
chr3	120094068	120094129	chr3b.29094068	365.681	.	24528.4	20.7784	19.8202	26
chr2	174567961	174568006	chr2b.80567961	365.608	.	24523.5	25.7153	24.6519	17
chr9	137214311	137214346	chr9.137214311	365.48	.	24515	19.7489	18.8154	12
chr18	49814336	49814378	chr18.49814336	364.776	.	24467.7	23.924	22.8943	20
chr6	36598896	36598934	chr6.36598896	364.697	.	24462.5	21.5374	20.5613	7
chrX	21940766	21940789	chrX.21940766	364.363	.	24440	12.6146	11.9004	4
chr13	51383400	51383435	chr13.51383400	364.254	.	24432.8	19.7489	18.8154	0
chr2	121338577	121338623	chr2b.27338577	364.163	.	24426.6	26.3126	25.2407	3
chr13	29849649	29849689	chr13.29849649	363.779	.	24400.9	22.7304	21.727	16
chr15	64682514	64682577	chr15.64682514	363.352	.	24372.2	21.4371	20.4625	0
chr11	65854952	65855047	chr11.65854952	363.027	.	24350.4	31.9515	30.811	36
chr4	70839631	70839737	chr4.70839631	362.576	.	24320.2	35.5586	34.2489	13
chr1	156479652	156479698	chr1b.31479652	362.395	.	24308	26.3126	25.2407	29
chr2	37645892	37645921	chr2.37645892	362.339	.	24304.3	16.1771	15.3264	5
chr3	172247665	172247717	chr3b.81247665	362.145	.	24291.3	17.8111	16.9242	50
chr13	110492097	110492142	chr13.110492097	361.717	.	24262.5	15.4986	14.6643	0
chr4	10075217	10075254	chr4.10075217	361.501	.	24248.1	20.941	19.9813	17
chr1	51909196	51909235	chr1.51909196	361.471	.	24246.1	22.1338	21.1438	22
chr12	48935137	48935241	chr12.48935137	361.115	.	24222.2	34.903	33.6863	11
chr10	119651496	119651540	chr10.119651496	360.61	.	24188.3	25.1181	24.0645	22
chr4	1245462	1245510	chr4.1245462	360.437	.	24176.7	18.7266	17.8116	4
chr13	26687531	26687599	chr13.26687531	359.774	.	24132.2	23.0828	22.0679	0
chr6	158502844	158502900	chr6b.73502844	359.549	.	24117.1	19.1306	18.2123	32
chr1	161120757	161120803	chr1b.36120757	359.055	.	24084	26.3126	25.2407	35
chr11	65501413	65501463	chr11.65501413	358.881	.	24072.3	17.1508	16.2804	3
chr13	20779450	20779493	chr13.20779450	358.405	.	24040.4	14.8371	14.0231	0
chr11	65128041	65128098	chr11.65128041	358.202	.	24026.8	19.4603	18.5296	13
chr22	17592250	17592293	chr22.17592250	357.936	.	24009	24.521	23.4783	4
chr2	73227139	73227208	chr2.73227139	357.845	.	24002.9	23.4117	22.3858	22
chr5	177513582	177513765	chr5b.93513582	357.791	.	23999.2	60.7592	57.6614	149
chr2	203440427	203440467	chr2b.109440427	357.75	.	23996.4	22.7304	21.727	2
chr7	137876938	137876982	chr7.137876938	357.364	.	23970.6	15.1678	14.3365	7
chr10	104312502	104312548	chr10.104312502	357.285	.	23965.3	26.3126	25.2407	12
chr1	24669451	24669538	chr1.24669451	357.255	.	23963.3	29.3262	28.2141	2
chrX	17727027	17727132	chrX.17727027	356.898	.	23939.3	35.2308	33.9822	32
chr15	62762345	62762388	chr15.62762345	356.204	.	23892.8	16.8397	15.9703	28
chr16	29799684	29799732	chr16.29799684	356.038	.	23881.7	27.5075	26.417	20
chrX	154441754	154441787	chrX.154441754	354.991	.	23811.4	18.5575	17.6525	5
chrX	150763748	150763814	chrX.150763748	354.839	.	23801.2	22.4246	21.4231	10
chr9	110061015	110061064	chr9.110061015	354.11	.	23752.3	16.8214	15.9528	6
chr15	68207696	68207730	chr15.68207696	353.615	.	23719.1	19.1531	18.2327	12
chr12	49032659	49032698	chr12.49032659	353.559	.	23715.3	22.1338	21.1438	26
chr11	119334867	119334916	chr11.119334867	353.489	.	23710.7	28.1051	27.0058	30
chr3	150409149	150409192	chr3b.59409149	353.414	.	23705.6	24.521	23.4783	21
chr3	128813861	128813898	chr3b.37813861	352.843	.	23667.3	20.941	19.9813	15
chr10	101579356	101579402	chr10.101579356	352.38	.	23636.3	15.8292	14.9827	13
chr9	137214996	137215048	chr9.137214996	352.365	.	23635.3	17.8111	16.9242	22
chr7	128652096	128652190	chr7.128652096	351.919	.	23605.4	31.6234	30.4861	25
chr11	64804112	64804208	chr11.64804112	351.853	.	23600.9	32.2795	31.1359	39
chr16	3850643	3850688	chr16.3850643	351.29	.	23563.2	25.7153	24.6519	18
chr14	21429045	21429094	chr14.21429045	351.285	.	23562.8	16.8211	15.9528	23
chr4	10099042	10099063	chr4.10099042	350.339	.	23499.4	11.43	10.764	0
chr1	26281233	26281298	chr1.26281233	349.914	.	23470.9	22.0955	21.1072	25
chr8	144291676	144291718	chr8.144291676	349.691	.	23455.9	23.924	22.8943	18
chr3	141876737	141876762	chr3b.50876737	349.149	.	23419.6	13.8008	13.0317	6
chr16	2002299	2002342	chr16.2002299	348.487	.	23375.1	24.521	23.4783	13
chr1	154970138	154970222	chr1b.29970138	347.584	.	23314.6	28.3412	27.2371	34
chr12	753045	753092	chr12.753045	347.435	.	23304.6	26.91	25.8284	9
chr16	28835117	28835145	chr16.28835117	347.36	.	23299.6	15.5826	14.7463	4
chr4	2928497	2928536	chr4.2928497	347.342	.	23298.3	22.1338	21.1438	12
chr5	471102	471132	chr5.471102	347.148	.	23285.3	16.7718	15.9116	4
chr9	137448704	137448794	chr9.137448704	347.131	.	23284.2	30.3109	29.1928	48
chr9	120856158	120856199	chr9.120856158	346.868	.	23266.5	23.3271	22.3107	29
chr6	73519000	73519023	chr6.73519000	346.755	.	23259	12.6146	11.9004	4
chr13	73062112	73062150	chr13.73062112	345.98	.	23207	13.1802	12.4353	21
chr3	100736626	100736667	chr3b.9736626	345.942	.	23204.4	23.3271	22.3107	1
chrX	154432415	154432442	chrX.154432415	345.914	.	23202.5	14.9883	14.1694	0
chr6	111719909	111719933	chr6b.26719909	345.576	.	23179.9	13.2075	12.4588	19
chr16	89561662	89561696	chr16.89561662	345.29	.	23160.7	19.1531	18.2327	28
chr13	41131936	41131972	chr13.41131936	344.758	.	23125	20.3449	19.3975	28
chr14	102233581	102233626	chr14.102233581	344.557	.	23111.5	25.7153	24.6519	13
chr13	98409426	98409452	chr13.98409426	344.494	.	23107.3	14.3944	13.6005	0
chr1	167553674	167553712	chr1b.42553674	344.454	.	23104.6	21.5374	20.5613	37
chr12	110340874	110340903	chr12.110340874	343.78	.	23059.4	16.1771	15.3264	19
chr11	58579527	58579569	chr11.58579527	343.635	.	23049.7	23.924	22.8943	17
chr10	123154988	123155034	chr10.123154988	343.413	.	23034.8	15.8292	14.9827	7
chr2	218594470	218594512	chr2b.124594470	343.367	.	23031.7	23.924	22.8943	0
chr16	786201	786331	chr16.786201	342.972	.	23005.2	43.4209	41.117	78
chr6	158502566	158502617	chr6b.73502566	342.729	.	22988.9	17.481	16.5977	17
chr7	130305832	130305875	chr7.130305832	342.266	.	22957.9	24.521	23.4783	34
chr2	215312104	215312141	chr2b.121312104	342.241	.	22956.2	20.941	19.9813	9
chr6	35427488	35427539	chr6.35427488	341.863	.	22930.8	17.481	16.5977	23
chr1	156468125	156468200	chr1b.31468125	341.532	.	22908.6	25.3847	24.3241	1
chr12	120212261	120212362	chr12.120212261	340.876	.	22864.6	33.9193	32.7297	22
chr5	10747252	10747283	chr5.10747252	340.374	.	22831	17.3668	16.4918	15
chr5	179774381	179774459	chr5b.95774381	339.642	.	22781.8	26.3705	25.292	17
chr2	163607875	163607958	chr2b.69607875	339.448	.	22768.8	28.0129	26.915	0
chr10	32287171	32287202	chr10.32287171	339.386	.	22764.6	17.3668	16.4918	7
chr8	22141562	22141602	chr8.22141562	339.384	.	22764.6	22.7304	21.727	7
chr16	69318870	69318918	chr16.69318870	339.302	.	22759	27.5075	26.417	8
chr14	24123241	24123334	chr14.24123241	339.275	.	22757.3	31.2953	30.1672	0
chr21	46132515	46132550	chr21.46132515	338.919	.	22733.3	19.7489	18.8154	32
chr20	31665127	31665228	chr20.31665127	338.822	.	22726.8	33.9193	32.7297	67
chr2	238253183	238253237	chr2b.144253183	338.794	.	22725	18.471	17.5689	22
chr9	129006723	129006805	chr9.129006723	338.563	.	22709.5	27.6846	26.5886	69
chr14	22879420	22879464	chr14.22879420	338.4	.	22698.5	25.1181	24.0645	22
chr5	140706186	140706236	chr5b.56706186	338.247	.	22688.3	17.1508	16.2804	15
chr17	42613901	42613959	chr17.42613901	337.857	.	22662.1	19.7899	18.8473	27
chr15	74044495	74044707	chr15.74044495	337.723	.	22653.1	70.2374	66.8027	19
chr20	35953989	35954164	chr20.35953989	337.361	.	22628.8	58.1437	55.215	15
chr7	158655254	158655417	chr7.158655254	337.14	.	22614	54.2194	51.4015	1
chr1	39564750	39564785	chr1.39564750	336.792	.	22590.7	19.7489	18.8154	14
chr21	45264366	45264409	chr21.45264366	336.721	.	22585.9	24.521	23.4783	10
chr12	54280937	54280974	chr12.54280937	336.567	.	22575.6	20.941	19.9813	26
chr7	75985165	75985221	chr7.75985165	336.211	.	22551.7	19.1306	18.2123	17
chr11	61967360	61967380	chr11.61967360	335.688	.	22516.7	10.8384	10.2364	12
chr20	33675731	33675773	chr20.33675731	335.462	.	22501.5	23.924	22.8943	19
chr20	3753863	3753992	chr20.3753863	335.361	.	22494.7	43.0935	40.8027	30
chr2	62222415	62222481	chr2.62222415	335.194	.	22483.5	22.4246	21.4231	0
chr15	68207358	68207469	chr15.68207358	334.82	.	22458.4	37.1975	35.8404	27
chr9	132691091	132691146	chr9.132691091	334.189	.	22416.1	18.8009	17.8851	12
chr21	31120265	31120315	chr21.31120265	334.105	.	22410.4	17.1508	16.2804	42
chr5	141511502	141511556	chr5b.57511502	334.031	.	22405.5	18.471	17.5689	21
chr5	179833681	179833733	chr5b.95833681	333.975	.	22401.7	17.8111	16.9242	31
chr2	96251049	96251084	chr2b.2251049	333.95	.	22400.1	19.7489	18.8154	0
chr20	31514550	31514584	chr20.31514550	333.541	.	22372.6	19.1531	18.2327	3
chr9	129011495	129011521	chr9.129011495	333.537	.	22372.3	14.3944	13.6005	17
chr8	41308646	41308679	chr8.41308646	333.391	.	22362.5	18.5575	17.6525	20
chr15	81003305	81003408	chr15.81003305	333.39	.	22362.5	34.5751	33.3781	4
chr6	52500360	52500412	chr6.52500360	333.267	.	22354.2	17.8111	16.9242	34
chr7	101206234	101206323	chr7.101206234	333.061	.	22340.4	29.9827	28.8665	42
chr12	119686986	119687036	chr12.119686986	332.91	.	22330.3	17.1508	16.2804	35
chr4	7760870	7760963	chr4.7760870	332.456	.	22299.8	31.2953	30.1672	12
chr11	82900272	82900317	chr11.82900272	332.335	.	22291.7	25.7153	24.6519	0
chr22	20582887	20582931	chr22.20582887	332.197	.	22282.5	25.1181	24.0645	14
chr3	160399903	160399937	chr3b.69399903	332.067	.	22273.8	19.1531	18.2327	12
chr16	2976914	2976974	chr16.2976914	331.918	.	22263.7	20.449	19.4923	32
chr2	113240129	113240209	chr2b.19240129	331.845	.	22258.8	27.0276	25.9408	23
chrX	74524645	74524682	chrX.74524645	331.584	.	22241.4	20.941	19.9813	3
chr7	76304166	76304190	chr7.76304166	331.567	.	22240.2	13.2075	12.4588	0
chr7	2355306	2355353	chr7.2355306	331.227	.	22217.4	26.91	25.8284	14
chr3	127034830	127034944	chr3b.36034830	331.216	.	22216.6	38.1804	36.7338	15
chr7	143388547	143388588	chr7.143388547	330.414	.	22162.9	23.3271	22.3107	0
chr6	35090403	35090438	chr6.35090403	330.2	.	22148.5	19.7489	18.8154	10
chr16	70661595	70661635	chr16.70661595	330.096	.	22141.6	22.7304	21.727	17
chr14	102016424	102016457	chr14.102016424	330.064	.	22139.4	18.5575	17.6525	0
chr8	23296049	23296077	chr8.23296049	329.414	.	22095.8	15.5826	14.7463	3
chr11	124746596	124746726	chr11.124746596	328.976	.	22066.4	43.4209	41.117	105
chr20	41162781	41162910	chr20.41162781	328.578	.	22039.7	43.0935	40.8027	61
chr7	75417904	75417949	chr7.75417904	328.374	.	22026	25.7153	24.6519	27
chr2	101859766	101859807	chr2b.7859766	328.171	.	22012.4	23.3271	22.3107	21
chr4	6923480	6923534	chr4.6923480	328.055	.	22004.7	18.4713	17.5689	0
chr8	144511057	144511144	chr8.144511057	327.593	.	21973.7	29.3262	28.2141	18
chr9	110171727	110171750	chr9.110171727	327.427	.	21962.5	12.6146	11.9004	16
chr8	143475489	143475530	chr8.143475489	327.312	.	21954.8	23.3271	22.3107	3
chr12	50099123	50099260	chr12.50099123	327.108	.	21941.1	45.7125	43.3081	74
chr1	171591736	171591790	chr1b.46591736	327.013	.	21934.8	18.471	17.5689	6
chr5	179840671	179840713	chr5b.95840671	326.783	.	21919.3	23.924	22.8943	0
chr7	100089341	100089385	chr7.100089341	326.402	.	21893.8	25.1181	24.0645	8
chr1	16138153	16138193	chr1.16138153	326.372	.	21891.7	22.7304	21.727	20
chr3	49705981	49706031	chr3.49705981	326.031	.	21868.9	19.48	18.547	3
chr9	137215421	137215469	chr9.137215421	325.918	.	21861.3	27.5075	26.417	17
chr7	44115864	44115900	chr7.44115864	325.721	.	21848.1	12.5164	11.8062	25
chr14	99502820	99502874	chr14.99502820	325.27	.	21817.8	18.4712	17.5689	35
chr3	100748316	100748391	chr3b.9748316	324.946	.	21796.1	25.3846	24.3241	42
chrX	135051522	135051556	chrX.135051522	324.871	.	21791.1	19.1531	18.2327	3
chr12	122231118	122231162	chr12.122231118	324.708	.	21780.1	25.1181	24.0645	16
chr15	43528173	43528209	chr15.43528173	324.434	.	21761.8	20.3449	19.3975	12
chr13	113837006	113837051	chr13.113837006	324.206	.	21746.5	25.7153	24.6519	30
chr9	134842466	134842525	chr9.134842466	323.982	.	21731.5	20.1195	19.1743	27
chr11	6614900	6614948	chr11.6614900	323.459	.	21696.4	27.5075	26.417	17
chr20	38551091	38551133	chr20.38551091	323.422	.	21693.9	23.924	22.8943	27
chr21	45265242	45265281	chr21.45265242	323.348	.	21688.9	22.1338	21.1438	0
chr3	57559925	57559964	chr3.57559925	322.643	.	21641.7	13.5118	12.7462	25
chr8	143923288	143923318	chr8.143923288	322.542	.	21634.9	16.7718	15.9116	17
chr15	74840334	74840379	chr15.74840334	322.488	.	21631.2	25.7153	24.6519	24
chr22	42619745	42619837	chr22.42619745	322.346	.	21621.7	30.9672	29.8456	69
chr11	65423400	65423488	chr11.65423400	321.926	.	21593.5	29.6544	28.5401	47
chr12	53307509	53307552	chr12.53307509	321.776	.	21583.5	24.521	23.4783	3
chr5	33526535	33526650	chr5.33526535	321.507	.	21565.4	43.8638	41.5358	0
chr22	38220161	38220242	chr22.38220161	321.172	.	21542.9	27.356	26.2677	48
chr5	177483612	177483657	chr5b.93483612	321.154	.	21541.7	25.7153	24.6519	10
chr6	156779151	156779190	chr6b.71779151	321.096	.	21537.8	22.1338	21.1438	14
chr10	73760104	73760157	chr10.73760104	320.883	.	21523.6	18.1411	17.2426	0
chr10	71828917	71828957	chr10.71828917	320.874	.	21523	13.8434	13.058	5
chrX	55006776	55006822	chrX.55006776	320.507	.	21498.4	26.3126	25.2407	20
chr3	47588019	47588059	chr3.47588019	320.396	.	21490.9	22.7304	21.727	5
chr7	4763974	4764011	chr7.4763974	319.446	.	21427.2	20.941	19.9813	0
chr2	127289744	127289777	chr2b.33289744	319.377	.	21422.6	18.5575	17.6525	6
chr6	169702737	169702776	chr6b.84702737	319.364	.	21421.7	22.1338	21.1438	0
chr9	130234928	130234967	chr9.130234928	319.263	.	21414.9	22.1338	21.1438	19
chr5	14144408	14144480	chr5.14144408	319.088	.	21403.2	24.3983	23.3574	0
chr6	34246617	34246692	chr6.34246617	319.03	.	21399.3	25.3846	24.3241	46
chr20	44006624	44006717	chr20.44006624	318.525	.	21365.4	31.2953	30.1672	77
chrX	154030009	154030044	chrX.154030009	318.392	.	21356.5	19.7489	18.8154	19
chr13	114325105	114325141	chr13.114325105	318.162	.	21341	12.5166	11.8062	7
chr17	44076103	44076184	chr17.44076103	317.704	.	21310.3	27.356	26.2677	35
chr10	24607600	24607627	chr10.24607600	316.787	.	21248.9	14.9883	14.1694	0
chr3	160565301	160565337	chr3b.69565301	316.516	.	21230.6	20.3449	19.3975	14
chr3	47590704	47590727	chr3.47590704	316.427	.	21224.7	12.6146	11.9004	0
chr2	37646249	37646276	chr2.37646249	316.359	.	21220.1	14.9883	14.1694	8
chr9	89002224	89002267	chr9.89002224	316.332	.	21218.3	16.8399	15.9703	8
chr1	224386479	224386546	chr1b.99386479	316.201	.	21209.5	22.7537	21.7402	18
chr7	2664100	2664222	chr7.2664100	315.987	.	21195.2	40.8012	38.5924	40
chr6	143826248	143826279	chr6b.58826248	315.984	.	21195	17.3668	16.4918	12
chr10	102643757	102643801	chr10.102643757	315.977	.	21194.5	25.1181	24.0645	0
chr1	109626940	109626988	chr1.109626940	315.786	.	21181.7	27.5075	26.417	25
chr14	73714122	73714270	chr14.73714122	315.54	.	21165.2	49.3124	46.7119	107
chr5	160093827	160093858	chr5b.76093827	315.22	.	21143.7	17.3668	16.4918	0
chr2	135112540	135112684	chr2b.41112540	315.163	.	21139.9	54.7088	51.8685	0
chr2	24819913	24819954	chr2.24819913	314.435	.	21091.1	23.3271	22.3107	5
chr2	218281962	218281997	chr2b.124281962	314.418	.	21089.9	19.7489	18.8154	19
chr11	65500680	65500704	chr11.65500680	314.08	.	21067.3	13.2075	12.4588	0
chr14	73276955	73276995	chr14.73276955	313.99	.	21061.2	22.7304	21.727	13
chr10	68074545	68074595	chr10.68074545	313.982	.	21060.7	17.151	16.2804	5
chr10	59792930	59792964	chr10.59792930	313.814	.	21049.4	19.1531	18.2327	28
chrX	154438802	154438833	chrX.154438802	313.612	.	21035.8	17.3668	16.4918	7
chrX	47186512	47186550	chrX.47186512	313.351	.	21018.4	21.5374	20.5613	0
chr8	23006901	23006939	chr8.23006901	313.203	.	21008.4	21.5374	20.5613	13
chr13	106491063	106491101	chr13.106491063	313.081	.	21000.3	21.5374	20.5613	12
chr12	113186856	113186901	chr12.113186856	312.313	.	20948.7	25.7153	24.6519	12
chr20	49246406	49246453	chr20.49246406	311.892	.	20920.5	26.91	25.8284	6
chr16	2972340	2972495	chr16.2972340	311.749	.	20910.9	51.6026	48.9096	54
chr14	74764172	74764207	chr14.74764172	311.733	.	20909.8	19.7489	18.8154	21
chr1	223951597	223951689	chr1b.98951597	311.389	.	20886.7	30.9677	29.8456	35
chr7	1499907	1500070	chr7.1499907	311.077	.	20865.8	54.2195	51.4015	15
chr10	649124	649178	chr10.649124	311.051	.	20864.1	20.9866	20.0157	15
chr1	43617872	43617905	chr1.43617872	310.953	.	20857.5	18.5575	17.6525	22
chr9	137083377	137083503	chr9.137083377	310.779	.	20845.8	42.1112	39.8393	39
chr3	17161011	17161151	chr3.17161011	310.747	.	20843.7	46.6945	44.2222	40
chr15	77114042	77114088	chr15.77114042	310.693	.	20840	26.3126	25.2407	24
chr1	155660044	155660173	chr1b.30660044	310.679	.	20839.1	43.0935	40.8027	73
chr2	86025602	86025678	chr2.86025602	310.532	.	20829.3	25.7132	24.6511	34
chr15	75467357	75467402	chr15.75467357	310.31	.	20814.4	25.7153	24.6519	0
chr6	90575553	90575625	chr6b.5575553	310.225	.	20808.7	24.3984	23.3574	17
chr21	44312157	44312179	chr21.44312157	310.086	.	20799.3	12.022	11.3295	0
chr2	25740196	25740250	chr2.25740196	309.966	.	20791.3	18.471	17.5689	11
chr12	49330434	49330535	chr12.49330434	309.869	.	20784.8	33.9193	32.7297	46
chr13	113622398	113622440	chr13.113622398	309.813	.	20781.1	16.462	15.604	0
chr1	39485597	39485837	chr1.39485597	308.873	.	20718	79.3847	75.7663	31
chr2	55419306	55419347	chr2.55419306	308.715	.	20707.4	23.3271	22.3107	1
chr11	64270164	64270213	chr11.64270164	308.69	.	20705.7	28.1051	27.0058	23
chr3	170129314	170129356	chr3b.79129314	308.283	.	20678.4	23.924	22.8943	6
chr12	69585494	69585513	chr12.69585494	308.199	.	20672.8	10.2473	9.7254	7
chr8	27672747	27672788	chr8.27672747	308.131	.	20668.2	23.3271	22.3107	9
chr5	176290671	176290796	chr5b.92290671	307.761	.	20643.4	41.7837	39.5378	53
chrX	47649935	47649967	chrX.47649935	307.755	.	20643	17.962	17.072	7
chr20	32165939	32166005	chr20.32165939	307.709	.	20639.9	22.4246	21.4231	50
chr1	8361152	8361264	chr1.8361152	307.63	.	20634.6	37.5251	36.1426	77
chr6	36685925	36685964	chr6.36685925	307.553	.	20629.5	22.1338	21.1438	11
chr12	120211685	120211789	chr12.120211685	307.504	.	20626.2	34.903	33.6863	63
chr12	110720142	110720208	chr12.110720142	307.466	.	20623.6	22.4246	21.4231	26
chr7	73441856	73441890	chr7.73441856	306.989	.	20591.6	19.1531	18.2327	14
chr3	128408433	128408532	chr3b.37408433	306.925	.	20587.3	33.2635	32.0888	0
chr20	63742915	63743014	chr20.63742915	306.653	.	20569.1	33.2635	32.0888	10
chr16	28823241	28823366	chr16.28823241	306.561	.	20562.9	41.7837	39.5378	44
chr17	82085766	82085812	chr17.82085766	306.475	.	20557.2	26.3126	25.2407	19
chr13	112823217	112823253	chr13.112823217	306.421	.	20553.5	14.1945	13.4019	14
chr12	56582105	56582135	chr12.56582105	306.178	.	20537.2	16.7718	15.9116	3
chr21	43694116	43694151	chr21.43694116	305.997	.	20525.1	19.7489	18.8154	10
chr12	6941416	6941464	chr12.6941416	305.779	.	20510.5	27.5075	26.417	26
chr14	102015985	102016025	chr14.102015985	305.471	.	20489.8	22.7304	21.727	13
chrX	150763934	150763987	chrX.150763934	304.744	.	20441	18.1411	17.2426	4
chr8	53882408	53882527	chr8.53882408	303.85	.	20381	45.3602	42.9668	0
chr7	44582112	44582157	chr7.44582112	303.772	.	20375.8	25.7153	24.6519	17
chrX	120560557	120560584	chrX.120560557	302.896	.	20317.1	14.9883	14.1694	10
chr2	96252876	96252902	chr2b.2252876	302.77	.	20308.6	14.3944	13.6005	3
chr10	90915701	90915747	chr10.90915701	302.232	.	20272.5	26.3126	25.2407	0
chr11	119336407	119336455	chr11.119336407	301.958	.	20254.1	27.5075	26.417	10
chr20	63567391	63567425	chr20.63567391	301.956	.	20254	19.1531	18.2327	20
chr1	156249718	156249767	chr1b.31249718	300.487	.	20155.5	28.1051	27.0058	2
chr9	127815546	127815588	chr9.127815546	300.465	.	20154	23.924	22.8943	6
chr4	1945730	1945865	chr4.1945730	300.199	.	20136.2	45.0583	42.6739	0
chr20	46061458	46061541	chr20.46061458	300.189	.	20135.5	28.0129	26.915	67
chr5	168579305	168579342	chr5b.84579305	299.451	.	20086	20.941	19.9813	27
chr16	1938774	1938816	chr16.1938774	299.333	.	20078.1	23.924	22.8943	27
chr16	1962571	1962625	chr16.1962571	299.279	.	20074.5	18.471	17.5689	22
chr1	36177951	36177983	chr1.36177951	299.264	.	20073.4	17.962	17.072	25
chr3	114350607	114350647	chr3b.23350607	299.208	.	20069.7	22.7304	21.727	28
chr4	10116796	10116815	chr4.10116796	299.084	.	20061.4	10.2473	9.7254	0
chr1	154251080	154251228	chr1b.29251080	298.734	.	20037.9	49.3124	46.7119	120
chr21	46256334	46256464	chr21.46256334	298.601	.	20029	49.4746	46.8697	0
chr8	143921973	143922003	chr8.143921973	298.288	.	20008	16.7718	15.9116	21
chr22	50506152	50506196	chr22.50506152	298.035	.	19991	25.1181	24.0645	34
chr1	150816368	150816411	chr1b.25816368	297.798	.	19975.1	24.521	23.4783	27
chr22	29278082	29278134	chr22.29278082	297.76	.	19972.6	17.8111	16.9242	19
chr20	36462493	36462536	chr20.36462493	297.529	.	19957.1	24.521	23.4783	7
chr3	134357616	134357649	chr3b.43357616	297.522	.	19956.6	18.5575	17.6525	16
chr10	102402358	102402439	chr10.102402358	297.159	.	19932.3	27.3561	26.2677	0
chr17	39204570	39204600	chr17.39204570	297.035	.	19923.9	16.7718	15.9116	6
chr21	33552723	33552752	chr21.33552723	296.967	.	19919.4	16.1771	15.3264	0
chr15	90881759	90881901	chr15.90881759	296.559	.	19892	47.349	44.8481	9
chr4	1986339	1986370	chr4.1986339	296.548	.	19891.3	17.3668	16.4918	0
chr1	204411168	204411218	chr1b.79411168	296.328	.	19876.5	17.1508	16.2804	34
chr8	100721808	100721830	chr8.100721808	296.261	.	19872	12.022	11.3295	19
chr8	143917699	143917728	chr8.143917699	296.15	.	19864.6	16.1771	15.3264	21
chr3	125013303	125013355	chr3b.34013303	296.142	.	19864.1	17.8111	16.9242	6
chr11	72007319	72007348	chr11.72007319	296.072	.	19859.3	16.1771	15.3264	1
chr1	225845476	225845510	chr1b.100845476	295.686	.	19833.5	19.1531	18.2327	18
chr11	66437194	66437231	chr11.66437194	295.642	.	19830.5	20.941	19.9813	1
chr3	47410233	47410284	chr3.47410233	295.535	.	19823.3	17.481	16.5977	10
chr7	76054866	76054911	chr7.76054866	295.502	.	19821.1	25.7153	24.6519	7
chr2	74460266	74460305	chr2.74460266	295.349	.	19810.9	22.1338	21.1438	0
chr11	126264452	126264497	chr11.126264452	294.968	.	19785.3	25.7153	24.6519	34
chr4	7054212	7054247	chr4.7054212	294.706	.	19767.7	19.7489	18.8154	30
chr15	77052801	77052821	chr15.77052801	294.697	.	19767.1	10.8384	10.2364	7
chr12	6384285	6384339	chr12.6384285	294.341	.	19743.2	18.471	17.5689	24
chr9	35754136	35754182	chr9.35754136	294.173	.	19731.9	26.3126	25.2407	0
chr2	113957994	113958017	chr2b.19957994	294.082	.	19725.9	12.6146	11.9004	12
chr16	579134	579175	chr16.579134	293.922	.	19715.1	23.3271	22.3107	21
chr11	119094927	119094971	chr11.119094927	293.859	.	19710.9	25.1181	24.0645	1
chrX	154364869	154364889	chrX.154364869	293.802	.	19707.1	10.8384	10.2364	3
chr14	22842613	22842636	chr14.22842613	293.752	.	19703.8	12.6146	11.9004	12
chr8	47962132	47962169	chr8.47962132	293.624	.	19695.1	20.941	19.9813	9
chr3	124967900	124967946	chr3b.33967900	293.394	.	19679.7	26.3126	25.2407	15
chrX	53614588	53614618	chrX.53614588	293.337	.	19675.9	16.7718	15.9116	10
chr9	110137369	110137407	chr9.110137369	293.267	.	19671.2	21.5374	20.5613	13
chr7	6655390	6655415	chr7.6655390	293.157	.	19663.8	13.8008	13.0317	19
chr8	144525759	144525798	chr8.144525759	292.555	.	19623.4	22.1338	21.1438	32
chr9	130235730	130235796	chr9.130235730	292.509	.	19620.3	22.4246	21.4231	35
chr5	34190050	34190096	chr5.34190050	292.132	.	19595.1	26.3126	25.2407	17
chr16	89290762	89290805	chr16.89290762	292.048	.	19589.5	24.521	23.4783	35
chr14	102209416	102209465	chr14.102209416	291.96	.	19583.6	28.1051	27.0058	5
chr16	2766093	2766145	chr16.2766093	291.852	.	19576.3	17.8111	16.9242	23
chr10	102401271	102401294	chr10.102401271	291.687	.	19565.2	12.6146	11.9004	0
chr5	98796243	98796279	chr5b.14796243	291.189	.	19531.8	20.3449	19.3975	0
chr5	135353068	135353147	chr5b.51353068	290.986	.	19518.2	26.6991	25.6186	8
chr3	47406526	47406563	chr3.47406526	290.877	.	19510.9	20.941	19.9813	0
chr9	33461690	33461722	chr9.33461690	290.712	.	19499.8	17.962	17.072	23
chr12	49050246	49050342	chr12.49050246	290.511	.	19486.4	32.2795	31.1359	39
chr13	109772169	109772211	chr13.109772169	290.438	.	19481.5	14.6415	13.8279	2
chr2	1648560	1648587	chr2.1648560	290.282	.	19471	14.9883	14.1694	1
chr5	126777405	126777461	chr5b.42777405	289.937	.	19447.9	19.1306	18.2123	10
chr19	4360562	4360756	chr19.4360562	289.848	.	19441.9	64.355	61.1568	121
chr5	173317173	173317207	chr5b.89317173	289.586	.	19424.3	19.1531	18.2327	5
chr15	74035919	74035950	chr15.74035919	289.153	.	19395.2	17.3668	16.4918	3
chr1	183552863	183552922	chr1b.58552863	288.669	.	19362.8	20.1196	19.1743	16
chr1	159918770	159918789	chr1b.34918770	288.312	.	19338.8	10.2473	9.7254	3
chr11	62807270	62807327	chr11.62807270	288.31	.	19338.7	19.4605	18.5296	36
chr2	47905794	47905820	chr2.47905794	288.126	.	19326.3	14.3944	13.6005	0
chr6	130415613	130415671	chr6b.45415613	287.986	.	19316.9	22.4918	21.4887	0
chr1	231337208	231337243	chr1b.106337208	287.59	.	19290.4	19.7489	18.8154	9
chr15	60347548	60347582	chr15.60347548	286.981	.	19249.6	19.1531	18.2327	0
chr2	240578140	240578167	chr2b.146578140	286.896	.	19243.9	14.9883	14.1694	0
chr5	73447981	73448016	chr5.73447981	286.254	.	19200.8	12.1843	11.4813	0
chr1	1254310	1254355	chr1.1254310	286.243	.	19200.1	25.7153	24.6519	13
chr6	87701708	87701729	chr6b.2701708	286.116	.	19191.6	11.43	10.764	3
chr3	47846191	47846226	chr3.47846191	285.995	.	19183.4	19.7489	18.8154	12
chr15	90638496	90638531	chr15.90638496	285.822	.	19171.8	12.1843	11.4813	0
chr4	55370002	55370042	chr4.55370002	285.5	.	19150.2	13.8437	13.058	6
chr16	29988005	29988099	chr16.29988005	285.099	.	19123.3	31.6235	30.4861	0
chr5	134648903	134648944	chr5b.50648903	284.977	.	19115.2	23.3271	22.3107	24
chr1	154275680	154275727	chr1b.29275680	284.745	.	19099.6	26.91	25.8284	22
chr2	233288699	233288749	chr2b.139288699	284.461	.	19080.5	17.1508	16.2804	15
chr8	144523873	144523912	chr8.144523873	284.424	.	19078.1	22.1338	21.1438	4
chr12	6753005	6753056	chr12.6753005	284.162	.	19060.5	17.481	16.5977	36
chr11	65624517	65624544	chr11.65624517	284.137	.	19058.8	14.9883	14.1694	0
chr5	179765366	179765568	chr5b.95765366	284.045	.	19052.6	66.9696	63.6957	0
chr11	64765413	64765543	chr11.64765413	283.899	.	19042.8	43.4209	41.117	100
chr8	23019070	23019109	chr8.23019070	283.88	.	19041.6	22.1338	21.1438	25
chr1	228494118	228494175	chr1b.103494118	283.818	.	19037.4	19.4605	18.5296	5
chr1	154261003	154261060	chr1b.29261003	283.724	.	19031.1	19.4603	18.5296	22
chr12	51243001	51243036	chr12.51243001	283.716	.	19030.6	19.7489	18.8154	3
chr10	43408510	43408567	chr10.43408510	283.587	.	19021.9	21.6709	20.6845	23
chr12	120534553	120534602	chr12.120534553	283.373	.	19007.6	28.1051	27.0058	1
chr7	137908309	137908356	chr7.137908309	283.285	.	19001.6	16.1598	15.3103	28
chrX	10117166	10117252	chrX.10117166	283.27	.	19000.7	28.9979	27.8896	8
chr14	23068513	23068608	chr14.23068513	283.179	.	18994.5	31.9514	30.811	52
chr12	8032945	8032981	chr12.8032945	283.163	.	18993.5	20.3449	19.3975	3
chr7	74405250	74405348	chr7.74405250	282.777	.	18967.5	32.9355	31.7873	22
chr9	130233223	130233262	chr9.130233223	282.562	.	18953.1	22.1338	21.1438	3
chrX	63351115	63351228	chrX.63351115	282.355	.	18939.2	37.8528	36.4329	88
chr2	241573767	241573806	chr2b.147573767	282.302	.	18935.7	22.1338	21.1438	0
chr3	50325819	50325860	chr3.50325819	281.709	.	18895.9	23.3271	22.3107	14
chr3	47408846	47408894	chr3.47408846	281.653	.	18892.2	27.5075	26.417	22
chr1	228494451	228494496	chr1b.103494451	281.582	.	18887.4	25.7153	24.6519	13
chr3	53231382	53231426	chr3.53231382	281.445	.	18878.2	25.1181	24.0645	25
chrX	47195793	47195827	chrX.47195793	281.381	.	18874	19.1531	18.2327	7
chr11	118406970	118407010	chr11.118406970	281.242	.	18864.6	22.7304	21.727	10
chr5	154814725	154814764	chr5b.70814725	281.172	.	18859.9	13.5118	12.7462	5
chr4	13540982	13541027	chr4.13540982	281.108	.	18855.6	25.7153	24.6519	10
chr13	29850204	29850239	chr13.29850204	281.106	.	18855.5	19.7489	18.8154	0
chr7	100689307	100689416	chr7.100689307	281.083	.	18853.9	36.5419	35.1921	39
chr11	883215	883258	chr11.883215	280.805	.	18835.3	24.521	23.4783	16
chr15	84784744	84784774	chr15.84784744	280.686	.	18827.3	16.7718	15.9116	10
chr17	7911604	7911751	chr17.7911604	280.645	.	18824.5	48.9852	46.404	110
chr7	139360158	139360203	chr7.139360158	280.461	.	18812.2	25.7153	24.6519	15
chr11	65891540	65891580	chr11.65891540	280.443	.	18811	22.7304	21.727	8
chr6	42938817	42938861	chr6.42938817	280.085	.	18787	25.1181	24.0645	0
chrX	153953640	153953689	chrX.153953640	280.03	.	18783.3	28.1051	27.0058	15
chrX	154487612	154487664	chrX.154487612	279.872	.	18772.7	17.8111	16.9242	25
chr5	173608280	173608311	chr5b.89608280	279.119	.	18722.2	17.3668	16.4918	10
chr5	140550642	140550681	chr5b.56550642	279.114	.	18721.9	22.1338	21.1438	22
chr7	35694608	35694651	chr7.35694608	279.024	.	18715.9	24.521	23.4783	22
chr5	177490439	177490465	chr5b.93490439	278.717	.	18695.2	14.3944	13.6005	0
chr1	226390490	226390517	chr1b.101390490	278.394	.	18673.6	14.9883	14.1694	23
chr1	154157495	154157514	chr1b.29157495	278.226	.	18662.3	10.2473	9.7254	4
chr12	48830439	48830491	chr12.48830439	278.042	.	18650	17.8111	16.9242	25
chr13	49996249	49996286	chr13.49996249	277.816	.	18634.8	14.5714	13.7603	0
chr7	139569312	139569391	chr7.139569312	277.785	.	18632.7	26.6992	25.6186	66
chr9	130887356	130887397	chr9.130887356	277.736	.	18629.4	23.3271	22.3107	26
chr6	149378637	149378701	chr6b.64378637	277.585	.	18619.3	21.7663	20.7795	18
chr2	24821031	24821086	chr2.24821031	277.387	.	18606	18.8009	17.8851	5
chr11	8684039	8684069	chr11.8684039	277.376	.	18605.3	16.7718	15.9116	15
chr8	38057160	38057194	chr8.38057160	277.175	.	18591.8	19.1531	18.2327	1
chr8	42175679	42175730	chr8.42175679	277.142	.	18589.6	17.481	16.5977	24
chr13	79520839	79520861	chr13.79520839	277.026	.	18581.8	12.022	11.3295	0
chrX	153948130	153948154	chrX.153948130	276.914	.	18574.3	13.2075	12.4588	17
chr1	109312167	109312212	chr1.109312167	276.771	.	18564.7	15.4988	14.6643	23
chr5	14461157	14461201	chr5.14461157	276.749	.	18563.2	15.168	14.3365	33
chr6	43029401	43029439	chr6.43029401	276.317	.	18534.3	21.5374	20.5613	1
chr8	102412627	102412663	chr8.102412627	276.285	.	18532.1	20.3449	19.3975	3
chr10	110508272	110508411	chr10.110508272	276.256	.	18530.1	52.8397	50.0729	0
chr8	140524699	140524735	chr8.140524699	276.087	.	18518.8	20.3449	19.3975	20
chr12	78119699	78119918	chr12.78119699	276.011	.	18513.7	72.5246	69.0254	153
chr12	124336876	124336915	chr12.124336876	275.998	.	18512.9	22.1338	21.1438	12
chr11	65211311	65211350	chr11.65211311	275.781	.	18498.3	22.1338	21.1438	8
chr1	109310939	109310972	chr1.109310939	275.774	.	18497.8	18.5575	17.6525	13
chr9	133762720	133762882	chr9.133762720	275.523	.	18481	54.5829	51.7464	11
chr4	1246373	1246445	chr4.1246373	275.342	.	18468.9	24.3984	23.3574	0
chr11	1276969	1277039	chr11.1276969	275.311	.	18466.8	23.7406	22.7126	66
chr11	1753050	1753130	chr11.1753050	275.279	.	18464.6	27.0275	25.9408	7
chr5	150372135	150372176	chr5b.66372135	275.222	.	18460.8	23.3271	22.3107	27
chr7	80918976	80919017	chr7.80918976	275.199	.	18459.3	23.3271	22.3107	8
chr11	64853732	64853766	chr11.64853732	275.182	.	18458.1	19.1531	18.2327	17
chr1	25816544	25816582	chr1.25816544	275.166	.	18457.1	21.5374	20.5613	14
chr5	73695391	73695422	chr5.73695391	275.113	.	18453.5	10.8538	10.2413	0
chr3	134356861	134356891	chr3b.43356861	275.09	.	18451.9	16.7718	15.9116	7
chr20	45883380	45883429	chr20.45883380	275.047	.	18449.1	28.1051	27.0058	14
chr13	40771053	40771083	chr13.40771053	274.931	.	18441.3	10.5206	9.93187	2
chr12	6537356	6537380	chr12.6537356	274.854	.	18436.1	13.2075	12.4588	1
chr8	143437884	143437924	chr8.143437884	274.843	.	18435.4	13.8433	13.058	4
chrX	48904757	48904846	chrX.48904757	274.734	.	18428	29.9827	28.8665	49
chr2	127057514	127057550	chr2b.33057514	274.636	.	18421.5	20.3449	19.3975	0
chr1	24360950	24360993	chr1.24360950	274.625	.	18420.8	24.521	23.4783	15
chr7	127347671	127347720	chr7.127347671	274.587	.	18418.2	28.1051	27.0058	0
chr17	81867830	81867867	chr17.81867830	273.964	.	18376.4	20.941	19.9813	15
chr9	115090769	115090801	chr9.115090769	273.962	.	18376.3	17.962	17.072	0
chr10	79312705	79312735	chr10.79312705	273.878	.	18370.6	16.7718	15.9116	7
chr5	157791782	157791820	chr5b.73791782	273.872	.	18370.3	13.1802	12.4353	25
chr14	24149450	24149491	chr14.24149450	273.56	.	18349.3	23.3271	22.3107	0
chr12	6927721	6927775	chr12.6927721	273.377	.	18337.1	18.471	17.5689	0
chr13	99238464	99238490	chr13.99238464	273.32	.	18333.2	14.3944	13.6005	0
chr2	68319483	68319520	chr2.68319483	273.099	.	18318.4	20.941	19.9813	7
chr6	73519496	73519527	chr6.73519496	273.035	.	18314.1	17.3668	16.4918	13
chr16	3023284	3023317	chr16.3023284	272.972	.	18309.9	18.5575	17.6525	0
chr8	133239002	133239047	chr8.133239002	272.922	.	18306.5	15.4987	14.6643	26
chr8	128066901	128066975	chr8.128066901	272.774	.	18296.6	25.056	24.0038	18
chr4	2247917	2247971	chr4.2247917	272.736	.	18294	18.471	17.5689	23
chr10	43397341	43397387	chr10.43397341	272.627	.	18286.7	26.3126	25.2407	0
chr19	14120095	14120142	chr19.14120095	272.543	.	18281.1	26.91	25.8284	25
chr13	98347078	98347183	chr13.98347078	272.279	.	18263.4	40.1218	38.434	0
chr13	95075659	95075764	chr13.95075659	272.279	.	18263.4	40.1218	38.434	0
chr13	87678029	87678134	chr13.87678029	272.279	.	18263.4	40.1218	38.434	0
chr13	51685880	51685985	chr13.51685880	272.279	.	18263.4	40.1218	38.434	0
chr13	49991609	49991714	chr13.49991609	272.279	.	18263.4	40.1218	38.434	0
chr13	41599761	41599866	chr13.41599761	272.279	.	18263.4	40.1218	38.434	0
chr13	33186981	33187086	chr13.33186981	272.279	.	18263.4	40.1218	38.434	0
chr13	33107121	33107226	chr13.33107121	272.279	.	18263.4	40.1218	38.434	0
chr13	32792479	32792584	chr13.32792479	272.279	.	18263.4	40.1218	38.434	0
chr13	21060529	21060634	chr13.21060529	272.279	.	18263.4	40.1218	38.434	0
chr13	114001611	114001716	chr13.114001611	272.279	.	18263.4	40.1218	38.434	0
chr13	113998409	113998514	chr13.113998409	272.279	.	18263.4	40.1218	38.434	0
chr13	113968089	113968194	chr13.113968089	272.279	.	18263.4	40.1218	38.434	0
chr13	113817669	113817774	chr13.113817669	272.279	.	18263.4	40.1218	38.434	0
chr13	113490478	113490583	chr13.113490478	272.279	.	18263.4	40.1218	38.434	0
chr13	113175716	113175821	chr13.113175716	272.279	.	18263.4	40.1218	38.434	0
chr13	111291290	111291395	chr13.111291290	272.279	.	18263.4	40.1218	38.434	0
chr13	108230278	108230383	chr13.108230278	272.279	.	18263.4	40.1218	38.434	0
chr13	107858847	107858952	chr13.107858847	272.279	.	18263.4	40.1218	38.434	0
chr13	107685746	107685851	chr13.107685746	272.279	.	18263.4	40.1218	38.434	0
chr17	42404612	42404663	chr17.42404612	272.219	.	18259.4	17.4811	16.5977	27
chr14	99515006	99515089	chr14.99515006	272.09	.	18250.7	28.0129	26.915	35
chr3	51662872	51662957	chr3.51662872	272.084	.	18250.3	28.6696	27.5631	24
chr1	26855411	26855444	chr1.26855411	271.903	.	18238.2	18.5575	17.6525	4
chr10	97452226	97452255	chr10.97452226	271.653	.	18221.4	10.1867	9.66905	2
chr9	35682050	35682069	chr9.35682050	271.523	.	18212.7	10.2473	9.7254	6
chr7	100095432	100095446	chr7.100095432	271.382	.	18203.3	7.30229	7.06842	5
chr12	49330737	49330852	chr12.49330737	271.331	.	18199.8	38.5081	37.0405	72
chr12	6537183	6537208	chr12.6537183	271.259	.	18195	13.8008	13.0317	5
chr8	144095382	144095526	chr8.144095382	271.046	.	18180.7	48.0035	45.4793	9
chr20	396395	396429	chr20.396395	270.945	.	18174	19.1531	18.2327	14
chr8	144399329	144399366	chr8.144399329	270.903	.	18171.1	20.941	19.9813	7
chr13	98322367	98322471	chr13.98322367	270.777	.	18162.7	39.7474	38.2076	0
chr13	97977308	97977412	chr13.97977308	270.777	.	18162.7	39.7474	38.2076	0
chr13	93966012	93966116	chr13.93966012	270.777	.	18162.7	39.7474	38.2076	0
chr13	75824071	75824175	chr13.75824071	270.777	.	18162.7	39.7474	38.2076	0
chr13	73767271	73767375	chr13.73767271	270.777	.	18162.7	39.7474	38.2076	0
chr13	46735387	46735491	chr13.46735387	270.777	.	18162.7	39.7474	38.2076	0
chr13	29579954	29580058	chr13.29579954	270.777	.	18162.7	39.7474	38.2076	0
chr13	29515597	29515701	chr13.29515597	270.777	.	18162.7	39.7474	38.2076	0
chr13	27091387	27091491	chr13.27091387	270.777	.	18162.7	39.7474	38.2076	0
chr13	20728602	20728706	chr13.20728602	270.777	.	18162.7	39.7474	38.2076	0
chr13	19959372	19959476	chr13.19959372	270.777	.	18162.7	39.7474	38.2076	0
chr13	114260161	114260265	chr13.114260161	270.777	.	18162.7	39.7474	38.2076	0
chr13	114066912	114067016	chr13.114066912	270.777	.	18162.7	39.7474	38.2076	0
chr13	113925497	113925601	chr13.113925497	270.777	.	18162.7	39.7474	38.2076	0
chr13	113407928	113408032	chr13.113407928	270.777	.	18162.7	39.7474	38.2076	0
chr13	112871467	112871571	chr13.112871467	270.777	.	18162.7	39.7474	38.2076	0
chr13	110151914	110152018	chr13.110151914	270.777	.	18162.7	39.7474	38.2076	0
chr13	108215318	108215422	chr13.108215318	270.777	.	18162.7	39.7474	38.2076	0
chr1	35191391	35191555	chr1.35191391	270.626	.	18152.5	54.5465	51.7175	124
chr16	25178085	25178143	chr16.25178085	270.577	.	18149.2	19.7899	18.8473	24
chr9	128185646	128185697	chr9.128185646	270.517	.	18145.2	17.481	16.5977	40
chr13	112705652	112705685	chr13.112705652	269.683	.	18089.3	13.0569	12.3146	16
chr5	14445176	14445255	chr5.14445176	269.612	.	18084.5	26.699	25.6186	5
chr2	127865048	127865074	chr2b.33865048	269.562	.	18081.1	14.3944	13.6005	7
chr7	128654495	128654549	chr7.128654495	269.51	.	18077.7	18.471	17.5689	5
chr10	79315444	79315485	chr10.79315444	269.334	.	18065.9	23.3271	22.3107	3
chr16	87832810	87832882	chr16.87832810	269.197	.	18056.7	24.3983	23.3574	51
chr12	49328996	49329029	chr12.49328996	269.192	.	18056.3	18.5575	17.6525	11
chrX	49075412	49075475	chrX.49075412	269.083	.	18049	21.437	20.4625	8
chrX	152700640	152700721	chrX.152700640	269.072	.	18048.3	27.3561	26.2677	32
chr5	37248942	37249031	chr5.37248942	268.752	.	18026.9	34.128	32.9338	0
chr13	98286017	98286120	chr13.98286017	268.683	.	18022.2	39.373	37.8975	0
chr13	97387605	97387708	chr13.97387605	268.683	.	18022.2	39.373	37.8975	0
chr13	94607436	94607539	chr13.94607436	268.683	.	18022.2	39.373	37.8975	0
chr13	75656736	75656839	chr13.75656736	268.683	.	18022.2	39.373	37.8975	0
chr13	61401575	61401678	chr13.61401575	268.683	.	18022.2	39.373	37.8975	0
chr13	52201776	52201879	chr13.52201776	268.683	.	18022.2	39.373	37.8975	0
chr13	39519486	39519589	chr13.39519486	268.683	.	18022.2	39.373	37.8975	0
chr13	36991575	36991678	chr13.36991575	268.683	.	18022.2	39.373	37.8975	0
chr13	114121956	114122059	chr13.114121956	268.683	.	18022.2	39.373	37.8975	0
chr13	113231343	113231446	chr13.113231343	268.683	.	18022.2	39.373	37.8975	0
chr13	113179937	113180040	chr13.113179937	268.683	.	18022.2	39.373	37.8975	0
chr13	112737917	112738020	chr13.112737917	268.683	.	18022.2	39.373	37.8975	0
chr13	102649636	102649739	chr13.102649636	268.683	.	18022.2	39.373	37.8975	0
chr3	127035428	127035459	chr3b.36035428	268.587	.	18015.8	17.3668	16.4918	0
chr19	38729884	38729954	chr19.38729884	268.395	.	18002.9	23.7406	22.7126	14
chr6	110614550	110614577	chr6b.25614550	268.112	.	17983.9	9.51944	9.07628	0
chr14	72969966	72970109	chr14.72969966	268.066	.	17980.8	47.6763	45.1683	61
chr7	44761851	44761899	chr7.44761851	268.007	.	17976.9	27.5075	26.417	29
chrX	47223672	47223696	chrX.47223672	267.81	.	17963.7	13.2075	12.4588	16
chr5	177337404	177337543	chr5b.93337404	267.779	.	17961.6	46.3672	43.9324	22
chr13	20988059	20988077	chr13.20988059	267.044	.	17912.3	9.65682	9.18443	8
chr17	28720789	28720826	chr17.28720789	266.831	.	17898	20.941	19.9813	11
chr2	101736346	101736395	chr2b.7736346	266.777	.	17894.3	28.1051	27.0058	1
chr5	59039147	59039183	chr5.59039147	266.733	.	17891.4	20.3449	19.3975	0
chr20	32433585	32433634	chr20.32433585	266.731	.	17891.2	28.1051	27.0058	14
chr1	10400470	10400507	chr1.10400470	266.294	.	17862	20.941	19.9813	0
chr16	3119762	3119891	chr16.3119762	266.192	.	17855.1	43.0935	40.8027	0
chr2	226798433	226798514	chr2b.132798433	265.82	.	17830.2	27.3562	26.2677	1
chr5	10654204	10654244	chr5.10654204	265.793	.	17828.4	15.7063	14.8607	5
chr14	74500525	74500571	chr14.74500525	265.74	.	17824.8	26.3126	25.2407	34
chrX	154358726	154358801	chrX.154358726	265.727	.	17823.9	25.3847	24.3241	0
chr8	144442378	144442414	chr8.144442378	265.723	.	17823.7	20.3449	19.3975	3
chr10	73793683	73793725	chr10.73793683	265.406	.	17802.4	23.924	22.8943	10
chr2	74527546	74527570	chr2.74527546	265.297	.	17795.1	13.2075	12.4588	7
chr7	72942204	72942238	chr7.72942204	265.25	.	17792	19.1531	18.2327	7
chr5	43066274	43066314	chr5.43066274	265.214	.	17789.5	22.7304	21.727	1
chr21	46265410	46265436	chr21.46265410	265.203	.	17788.8	14.3944	13.6005	5
chr7	130936563	130936604	chr7.130936563	264.373	.	17733.1	23.3271	22.3107	14
chr7	5312662	5312717	chr7.5312662	264.089	.	17714.1	18.8009	17.8851	22
chr1	154183005	154183033	chr1b.29183005	263.604	.	17681.5	15.5826	14.7463	0
chr14	92652522	92652588	chr14.92652522	263.587	.	17680.4	22.4246	21.4231	32
chr13	25974600	25974700	chr13.25974600	263.585	.	17680.3	38.2504	36.8012	0
chrX	72144893	72144931	chrX.72144893	263.492	.	17674	21.5374	20.5613	4
chr9	128720732	128720802	chr9.128720732	263.395	.	17667.5	23.7407	22.7126	3
chr6	35426015	35426055	chr6.35426015	263.233	.	17656.6	22.7304	21.727	26
chr1	153929572	153929602	chr1b.28929572	263.174	.	17652.7	16.7718	15.9116	9
chr3	44443056	44443118	chr3.44443056	263.025	.	17642.7	21.1077	20.1366	23
chr10	1000711	1000731	chr10.1000711	262.954	.	17637.9	10.8384	10.2364	0
chr8	144548087	144548153	chr8.144548087	262.888	.	17633.5	22.4246	21.4231	44
chr5	140567547	140567644	chr5b.56567547	262.881	.	17633.1	32.6075	31.4615	32
chr2	20202666	20202720	chr2.20202666	262.823	.	17629.1	18.471	17.5689	0
chr22	38862186	38862228	chr22.38862186	262.784	.	17626.5	23.924	22.8943	20
chr12	6385099	6385138	chr12.6385099	262.498	.	17607.3	22.1338	21.1438	14
chrX	153695430	153695560	chrX.153695430	262.448	.	17604	49.4751	46.8697	0
chr6	41770550	41770603	chr6.41770550	262.381	.	17599.5	18.1411	17.2426	13
chr9	137216553	137216603	chr9.137216553	262.161	.	17584.7	17.1508	16.2804	0
chr11	117204435	117204480	chr11.117204435	262.14	.	17583.4	25.7153	24.6519	1
chr9	128437025	128437115	chr9.128437025	262.077	.	17579.1	30.3109	29.1928	1
chr1	154959526	154959605	chr1b.29959526	262.05	.	17577.3	26.6992	25.6186	22
chr3	9944585	9944626	chr3.9944585	261.843	.	17563.4	23.3271	22.3107	1
chr3	48468094	48468130	chr3.48468094	261.694	.	17553.4	12.5164	11.8062	23
chr4	2269869	2269953	chr4.2269869	261.692	.	17553.3	32.2542	31.1108	0
chr15	74782542	74782592	chr15.74782542	261.563	.	17544.6	17.1508	16.2804	40
chr1	156646340	156646475	chr1b.31646340	261.391	.	17533.1	45.0578	42.6739	37
chr20	63202946	63202990	chr20.63202946	261.382	.	17532.5	25.1181	24.0645	12
chr1	201876838	201876884	chr1b.76876838	261.327	.	17528.8	26.3126	25.2407	22
chr13	95243459	95243558	chr13.95243459	261.191	.	17519.7	37.876	36.4536	0
chr13	40560353	40560452	chr13.40560353	261.191	.	17519.7	37.876	36.4536	0
chr13	25338982	25339081	chr13.25338982	261.191	.	17519.7	37.876	36.4536	0
chr4	77035992	77036018	chr4.77035992	261.175	.	17518.6	14.3944	13.6005	0
chr15	48537677	48537716	chr15.48537677	261.158	.	17517.5	22.1338	21.1438	10
chr3	28241669	28241707	chr3.28241669	260.926	.	17501.9	21.5374	20.5613	3
chr11	69654099	69654127	chr11.69654099	260.67	.	17484.7	15.5826	14.7463	25
chr12	57821964	57821983	chr12.57821964	260.409	.	17467.2	10.2473	9.7254	3
chr14	68789410	68789481	chr14.68789410	260.289	.	17459.2	24.0695	23.0302	25
chr5	32125467	32125494	chr5.32125467	260.17	.	17451.2	14.9883	14.1694	8
chr8	102864022	102864048	chr8.102864022	259.606	.	17413.4	14.3944	13.6005	0
chr3	24121579	24121669	chr3.24121579	259.547	.	17409.4	34.5027	33.3061	0
chr1	16125200	16125246	chr1.16125200	259.198	.	17386	26.3126	25.2407	0
chr15	82261780	82261821	chr15.82261780	259.154	.	17383	23.3271	22.3107	6
chr13	99667873	99667971	chr13.99667873	259.059	.	17376.7	37.5015	36.1426	0
chr13	94124078	94124176	chr13.94124078	259.059	.	17376.7	37.5015	36.1426	0
chr13	93253692	93253790	chr13.93253692	259.059	.	17376.7	37.5015	36.1426	0
chr13	75789422	75789520	chr13.75789422	259.059	.	17376.7	37.5015	36.1426	0
chr13	50082193	50082291	chr13.50082193	259.059	.	17376.7	37.5015	36.1426	0
chr13	43572733	43572831	chr13.43572733	259.059	.	17376.7	37.5015	36.1426	0
chr13	29551504	29551602	chr13.29551504	259.059	.	17376.7	37.5015	36.1426	0
chr13	27432884	27432982	chr13.27432884	259.059	.	17376.7	37.5015	36.1426	0
chr13	114323028	114323126	chr13.114323028	259.059	.	17376.7	37.5015	36.1426	0
chr13	113971142	113971240	chr13.113971142	259.059	.	17376.7	37.5015	36.1426	0
chr13	112769496	112769594	chr13.112769496	259.059	.	17376.7	37.5015	36.1426	0
chr13	109284217	109284315	chr13.109284217	259.059	.	17376.7	37.5015	36.1426	0
chr13	101690527	101690625	chr13.101690527	259.059	.	17376.7	37.5015	36.1426	0
chr13	100152908	100153006	chr13.100152908	259.059	.	17376.7	37.5015	36.1426	0
chr11	66267290	66267338	chr11.66267290	259.05	.	17376.1	27.5075	26.417	8
chr2	238909911	238909955	chr2b.144909911	259.041	.	17375.5	25.1181	24.0645	18
chr5	173318942	173318984	chr5b.89318942	259.039	.	17375.3	14.5058	13.6973	18
chr7	74657928	74657998	chr7.74657928	259.014	.	17373.6	23.7406	22.7126	22
chr21	45148082	45148120	chr21.45148082	258.928	.	17367.9	21.5374	20.5613	8
chr8	144107492	144107518	chr8.144107492	258.809	.	17359.9	14.3944	13.6005	3
chr1	236551286	236551362	chr1b.111551286	258.735	.	17354.9	25.7132	24.6511	68
chr3	184320659	184320788	chr3b.93320659	258.321	.	17327.2	43.0935	40.8027	98
chr1	43605346	43605377	chr1.43605346	258.287	.	17324.9	17.3668	16.4918	21
chr3	184193759	184193808	chr3b.93193759	258.228	.	17320.9	28.1051	27.0058	25
chr7	151123259	151123350	chr7.151123259	258.221	.	17320.4	30.6391	29.5195	22
chr1	240207332	240207384	chr1b.115207332	258.201	.	17319.1	17.8111	16.9242	3
chr12	111448512	111448607	chr12.111448512	258.087	.	17311.4	31.9514	30.811	54
chr20	32166866	32166914	chr20.32166866	257.928	.	17300.8	27.5075	26.417	10
chr1	150553740	150553783	chr1b.25553740	257.873	.	17297.1	24.521	23.4783	13
chr12	6940914	6940954	chr12.6940914	257.534	.	17274.4	22.7304	21.727	15
chr16	69324229	69324269	chr16.69324229	257.395	.	17265	22.7304	21.727	9
chr1	234607495	234607545	chr1b.109607495	257.386	.	17264.5	17.1508	16.2804	33
chr9	131476226	131476302	chr9.131476226	257.347	.	17261.9	25.7132	24.6511	1
chr2	130151890	130151931	chr2b.36151890	257.313	.	17259.6	14.1747	13.3863	13
chr3	111945665	111945738	chr3b.20945665	257.199	.	17251.9	28.1275	27.0237	12
chr14	92652172	92652254	chr14.92652172	257.06	.	17242.6	27.6845	26.5886	29
chr7	151077644	151077689	chr7.151077644	256.836	.	17227.6	25.7153	24.6519	0
chr17	82585989	82586034	chr17.82585989	256.777	.	17223.6	25.7153	24.6519	10
chr1	9264660	9264702	chr1.9264660	256.757	.	17222.3	23.924	22.8943	0
chr16	74661212	74661252	chr16.74661212	256.626	.	17213.4	22.7304	21.727	24
chr7	75417498	75417536	chr7.75417498	256.578	.	17210.2	21.5374	20.5613	4
chr2	85310015	85310052	chr2.85310015	256.425	.	17200	20.941	19.9813	18
chr9	124356506	124356550	chr9.124356506	256.357	.	17195.4	15.1678	14.3365	17
chr1	225920480	225920535	chr1b.100920480	255.894	.	17164.4	18.8009	17.8851	26
chr11	65624344	65624384	chr11.65624344	255.65	.	17148	22.7304	21.727	14
chr1	179882351	179882396	chr1b.54882351	255.601	.	17144.7	25.7153	24.6519	0
chr20	53576128	53576174	chr20.53576128	255.386	.	17130.3	26.3126	25.2407	11
chr13	113855869	113855898	chr13.113855869	255.285	.	17123.5	16.1771	15.3264	12
chr2	218635664	218635779	chr2b.124635664	255.256	.	17121.5	43.8636	41.5358	0
chr1	955976	956041	chr1.955976	255.22	.	17119.1	22.0955	21.1072	29
chr4	1812628	1812674	chr4.1812628	255.159	.	17115.1	15.8292	14.9827	7
chr2	54657974	54658050	chr2.54657974	255.04	.	17107.1	25.7133	24.6511	0
chr5	5464833	5464943	chr5.5464833	254.692	.	17083.7	36.8699	35.5179	0
chr10	6840658	6840695	chr10.6840658	254.661	.	17081.6	12.8484	12.1116	13
chr2	203113066	203113098	chr2b.109113066	254.643	.	17080.5	12.6766	11.9434	0
chrX	149480195	149480237	chrX.149480195	254.292	.	17056.9	23.924	22.8943	0
chr8	47737495	47737700	chr8.47737495	254.25	.	17054.1	67.9501	64.6092	0
chr9	137039798	137039846	chr9.137039798	254.212	.	17051.5	27.5075	26.417	20
chr11	62593294	62593345	chr11.62593294	254.206	.	17051.1	17.481	16.5977	19
chr6	113971024	113971050	chr6b.28971024	254.197	.	17050.5	14.3944	13.6005	5
chr12	120696446	120696486	chr12.120696446	254.168	.	17048.6	22.7304	21.727	20
chr10	22714290	22714327	chr10.22714290	254.129	.	17046	20.941	19.9813	13
chr2	171160691	171160721	chr2b.77160691	254.085	.	17043	16.7718	15.9116	0
chr5	14450460	14450502	chr5.14450460	254.045	.	17040.3	16.4622	15.604	13
chr12	106238925	106238964	chr12.106238925	253.994	.	17036.9	22.1338	21.1438	6
chr12	111453720	111453750	chr12.111453720	253.943	.	17033.5	16.7718	15.9116	10
chr10	100360934	100360975	chr10.100360934	253.636	.	17012.9	23.3271	22.3107	10
chr13	97434569	97434607	chr13.97434569	253.427	.	16998.9	13.1802	12.4353	4
chr17	77498744	77498942	chr17.77498744	253.318	.	16991.6	65.6623	62.4184	3
chr8	144263511	144263536	chr8.144263511	253.253	.	16987.2	13.8008	13.0317	0
chr5	138467063	138467226	chr5b.54467063	253.12	.	16978.3	54.2196	51.4015	0
chr21	46443654	46443865	chr21.46443654	252.873	.	16961.7	79.7341	76.041	0
chr8	127738863	127738905	chr8.127738863	252.713	.	16951	23.924	22.8943	6
chr8	144106566	144106604	chr8.144106566	252.638	.	16946	21.5374	20.5613	14
chr2	27384776	27384822	chr2.27384776	252.319	.	16924.6	26.3126	25.2407	0
chr1	151286814	151286860	chr1b.26286814	252.206	.	16917	26.3126	25.2407	10
chr12	95282373	95282414	chr12.95282373	252.177	.	16915	23.3271	22.3107	0
chr9	93516058	93516085	chr9.93516058	252.108	.	16910.4	14.9883	14.1694	7
chr1	42926679	42926721	chr1.42926679	252.083	.	16908.8	23.924	22.8943	8
chr4	4321063	4321166	chr4.4321063	251.957	.	16900.3	34.5756	33.3781	0
chr5	128259697	128259755	chr5b.44259697	251.905	.	16896.8	19.7899	18.8473	0
chr9	133342553	133342597	chr9.133342553	251.747	.	16886.2	25.1181	24.0645	0
chr3	120448772	120448841	chr3b.29448772	251.574	.	16874.6	23.4117	22.3858	18
chr8	144501170	144501207	chr8.144501170	251.16	.	16846.8	20.941	19.9813	0
chrX	24054872	24054904	chrX.24054872	251.079	.	16841.4	17.962	17.072	17
chr11	57817353	57817451	chr11.57817353	251.062	.	16840.2	32.9355	31.7873	57
chr13	75636603	75636634	chr13.75636603	250.55	.	16805.9	10.8541	10.2413	2
chr19	15238092	15238167	chr19.15238092	250.498	.	16802.4	25.3846	24.3241	50
chr10	75399955	75399993	chr10.75399955	250.489	.	16801.8	21.5374	20.5613	16
chr9	134843556	134843609	chr9.134843556	250.449	.	16799.1	18.1411	17.2426	47
chrX	19887357	19887389	chrX.19887357	250.318	.	16790.3	17.962	17.072	5
chrX	111707930	111708064	chrX.111707930	250.277	.	16787.6	45.0336	42.651	0
chr14	20408112	20408241	chr14.20408112	249.971	.	16767.1	43.0935	40.8027	21
chr14	63542849	63542882	chr14.63542849	249.797	.	16755.4	18.5575	17.6525	8
chr16	31477462	31477555	chr16.31477462	249.785	.	16754.6	31.2953	30.1672	43
chr8	144547988	144548026	chr8.144547988	249.66	.	16746.2	21.5374	20.5613	1
chr1	153953294	153953328	chr1b.28953294	249.65	.	16745.5	19.1531	18.2327	3
chr9	131146175	131146212	chr9.131146175	249.424	.	16730.4	20.941	19.9813	0
chr6	99550505	99550560	chr6b.14550505	249.344	.	16725	21.363	20.3894	19
chrX	154016606	154016635	chrX.154016606	249.191	.	16714.8	16.1771	15.3264	0
chr6	110680164	110680301	chr6b.25680164	249.161	.	16712.7	52.0921	49.3651	0
chr2	73074310	73074361	chr2.73074310	248.966	.	16699.7	17.4813	16.5977	6
chr7	137879970	137879983	chr7.137879970	248.928	.	16697.1	6.71603	6.51675	10
chr9	128714820	128714854	chr9.128714820	248.865	.	16692.9	19.1531	18.2327	0
chr13	93741770	93741863	chr13.93741770	248.695	.	16681.5	35.6297	34.3118	0
chr13	75625954	75626047	chr13.75625954	248.695	.	16681.5	35.6297	34.3118	0
chr13	43258338	43258431	chr13.43258338	248.695	.	16681.5	35.6297	34.3118	0
chr13	24304528	24304621	chr13.24304528	248.695	.	16681.5	35.6297	34.3118	0
chr13	20814376	20814469	chr13.20814376	248.695	.	16681.5	35.6297	34.3118	0
chr6	147204433	147204490	chr6b.62204433	248.612	.	16675.9	19.4604	18.5296	10
chr9	136358413	136358451	chr9.136358413	248.503	.	16668.6	21.5374	20.5613	0
chr12	56163682	56163727	chr12.56163682	248.216	.	16649.4	25.7153	24.6519	23
chr13	20999186	20999219	chr13.20999186	248.102	.	16641.7	13.0557	12.3146	0
chr1	43620878	43620923	chr1.43620878	248.068	.	16639.4	25.7153	24.6519	15
chr12	121641917	121641969	chr12.121641917	248.027	.	16636.6	17.8112	16.9242	20
chr20	26208409	26208428	chr20.26208409	247.637	.	16610.5	10.2473	9.7254	12
chrX	150470703	150470738	chrX.150470703	247.535	.	16603.6	19.7489	18.8154	11
chr3	48632104	48632141	chr3.48632104	247.483	.	16600.2	20.941	19.9813	0
chr5	10258404	10258430	chr5.10258404	247.344	.	16590.9	14.3944	13.6005	0
chr1	154970366	154970437	chr1b.29970366	247.312	.	16588.7	24.0695	23.0302	24
chr3	124796660	124796703	chr3b.33796660	247.181	.	16580	24.521	23.4783	5
chr2	26034147	26034254	chr2.26034147	246.886	.	16560.2	35.8871	34.5458	14
chr6	133889714	133889730	chr6b.48889714	246.766	.	16552.1	8.4779	8.14119	0
chrX	154367691	154367712	chrX.154367691	246.67	.	16545.6	11.43	10.764	0
chr17	7251463	7251534	chr17.7251463	246.557	.	16538.1	24.0695	23.0302	33
chr5	146457193	146457234	chr5b.62457193	246.351	.	16524.3	23.3271	22.3107	0
chr1	26779445	26779591	chr1.26779445	246.311	.	16521.6	48.658	46.1052	109
chr8	47961601	47961637	chr8.47961601	246.247	.	16517.3	20.3449	19.3975	0
chr3	48469531	48469568	chr3.48469531	246.16	.	16511.5	12.8484	12.1116	35
chr8	143929802	143929836	chr8.143929802	245.813	.	16488.2	19.1531	18.2327	14
chr9	33111590	33111645	chr9.33111590	245.738	.	16483.1	18.8009	17.8851	13
chr9	128917424	128917487	chr9.128917424	245.641	.	16476.7	21.437	20.4625	26
chr15	90882809	90882858	chr15.90882809	245.607	.	16474.3	28.1051	27.0058	0
chr3	45225903	45225942	chr3.45225903	245.516	.	16468.2	22.1338	21.1438	8
chr1	26853814	26853881	chr1.26853814	245.316	.	16454.9	22.7537	21.7402	37
chr3	52199242	52199279	chr3.52199242	244.865	.	16424.6	20.941	19.9813	8
chr5	6752924	6752963	chr5.6752924	244.704	.	16413.8	22.1338	21.1438	0
chr12	122133520	122133632	chr12.122133520	244.694	.	16413.1	37.5251	36.1426	34
chrX	71245827	71245865	chrX.71245827	244.646	.	16409.9	21.5374	20.5613	11
chr6	154733722	154733762	chr6b.69733722	244.573	.	16405	22.7304	21.727	8
chr3	33093371	33093414	chr3.33093371	244.453	.	16396.9	24.521	23.4783	1
chr5	146062538	146062578	chr5b.62062538	244.391	.	16392.8	22.7304	21.727	23
chr2	206056507	206056577	chr2b.112056507	244.356	.	16390.4	23.7406	22.7126	45
chr5	181242235	181242259	chr5b.97242235	244.095	.	16373	13.2075	12.4588	14
chr10	110510192	110510226	chr10.110510192	244.065	.	16370.9	19.1531	18.2327	1
chr5	179878408	179878442	chr5b.95878408	244.053	.	16370.1	19.1531	18.2327	5
chr5	138467878	138467909	chr5b.54467878	243.988	.	16365.8	17.3668	16.4918	5
chr22	42585809	42585855	chr22.42585809	243.951	.	16363.3	26.3126	25.2407	27
chr11	65636281	65636314	chr11.65636281	243.941	.	16362.6	18.5575	17.6525	17
chr16	31109104	31109146	chr16.31109104	243.861	.	16357.2	23.924	22.8943	19
chrX	49079796	49079827	chrX.49079796	243.731	.	16348.5	17.3668	16.4918	4
chr2	112559411	112559442	chr2b.18559411	243.543	.	16335.9	17.3668	16.4918	2
chr10	125036218	125036332	chr10.125036218	243.53	.	16335	43.4894	41.1743	0
chr13	110699842	110699901	chr13.110699842	243.485	.	16332	21.2498	20.2762	15
chr2	120222510	120222555	chr2b.26222510	243.471	.	16331.1	25.7153	24.6519	20
chr2	54629510	54629534	chr2.54629510	243.398	.	16326.2	13.2075	12.4588	11
chr8	144313602	144313632	chr8.144313602	243.167	.	16310.7	16.7718	15.9116	13
chr7	2646883	2646909	chr7.2646883	243.167	.	16310.7	14.3944	13.6005	0
chr15	66499574	66499590	chr15.66499574	243.145	.	16309.2	8.4779	8.14119	0
chr9	130886649	130886689	chr9.130886649	243.071	.	16304.3	22.7304	21.727	13
chr6	12296106	12296144	chr6.12296106	243.044	.	16302.4	21.5374	20.5613	17
chr9	133341544	133341592	chr9.133341544	242.66	.	16276.7	27.5075	26.417	13
chr3	49121163	49121212	chr3.49121163	242.613	.	16273.5	28.1051	27.0058	1
chr14	104769869	104769920	chr14.104769869	242.489	.	16265.2	17.481	16.5977	14
chr17	41974844	41974892	chr17.41974844	242.414	.	16260.2	27.5075	26.417	0
chr10	128098743	128098762	chr10.128098743	242.369	.	16257.1	10.2473	9.7254	16
chr15	75685290	75685326	chr15.75685290	242.356	.	16256.3	20.3449	19.3975	0
chr2	73239714	73239734	chr2.73239714	242.022	.	16233.9	10.8384	10.2364	3
chr12	6536749	6536769	chr12.6536749	241.672	.	16210.4	10.8384	10.2364	6
chr3	50184657	50184690	chr3.50184657	241.528	.	16200.8	18.5575	17.6525	14
chr5	138352777	138352821	chr5b.54352777	241.418	.	16193.4	25.1181	24.0645	16
chr16	31078882	31078938	chr16.31078882	241.367	.	16189.9	19.1306	18.2123	15
chr5	34192060	34192102	chr5.34192060	241.303	.	16185.6	23.924	22.8943	0
chr19	41231012	41231043	chr19.41231012	241.069	.	16170	17.3668	16.4918	14
chr13	45515006	45515111	chr13.45515006	241.025	.	16167	35.5717	34.2589	0
chr16	3022889	3022949	chr16.3022889	241.006	.	16165.8	20.449	19.4923	27
chr3	48158706	48158802	chr3.48158706	240.976	.	16163.7	32.2798	31.1359	33
chr5	177492066	177492107	chr5b.93492066	240.824	.	16153.5	14.1746	13.3863	1
chr4	17810584	17810626	chr4.17810584	240.799	.	16151.8	23.924	22.8943	5
chr6	130890362	130890383	chr6b.45890362	240.653	.	16142	11.43	10.764	0
chr1	22526596	22526637	chr1.22526596	240.617	.	16139.6	23.3271	22.3107	5
chr6	88963405	88963429	chr6b.3963405	240.335	.	16120.7	13.2075	12.4588	0
chr22	29049456	29049549	chr22.29049456	240.112	.	16105.8	31.2953	30.1672	45
chr19	6414124	6414283	chr19.6414124	240.099	.	16104.9	52.9111	50.1345	9
chr12	131982336	131982389	chr12.131982336	240.042	.	16101	18.1411	17.2426	0
chr1	28280890	28280944	chr1.28280890	239.771	.	16082.9	18.4713	17.5689	23
chr3	16316482	16316551	chr3.16316482	239.743	.	16081	23.4117	22.3858	18
chr4	41424149	41424180	chr4.41424149	239.659	.	16075.4	17.3668	16.4918	6
chr3	58111846	58111865	chr3.58111846	239.609	.	16072.1	10.2473	9.7254	7
chr11	119418548	119418726	chr11.119418548	239.213	.	16045.5	59.1246	56.1251	15
chr4	55397174	55397229	chr4.55397174	239.2	.	16044.6	21.3633	20.3895	0
chr5	67164603	67164696	chr5.67164603	239.177	.	16043	31.4371	30.3002	0
chr1	27409918	27409960	chr1.27409918	238.765	.	16015.4	23.924	22.8943	4
chr9	136115928	136115968	chr9.136115928	238.746	.	16014.1	22.7304	21.727	19
chr2	226799541	226799569	chr2b.132799541	238.44	.	15993.6	9.85385	9.37222	8
chr1	222665433	222665563	chr1b.97665433	238.368	.	15988.8	43.4209	41.117	8
chr11	3827170	3827329	chr11.3827170	238.301	.	15984.3	52.9111	50.1345	28
chr17	7244050	7244092	chr17.7244050	237.997	.	15963.9	23.924	22.8943	30
chr3	49115581	49115692	chr3.49115581	237.8	.	15950.7	37.1974	35.8404	42
chr2	113265540	113265572	chr2b.19265540	237.718	.	15945.2	17.962	17.072	0
chr1	93346434	93346488	chr1.93346434	237.476	.	15928.9	18.471	17.5689	31
chr7	2376702	2376819	chr7.2376702	237.38	.	15922.5	39.1634	37.6912	33
chr5	73448341	73448371	chr5.73448341	237.292	.	15916.6	16.7718	15.9116	20
chr19	45687559	45687605	chr19.45687559	237.23	.	15912.5	26.3126	25.2407	30
chr1	158038115	158038165	chr1b.33038115	237.217	.	15911.6	19.48	18.547	15
chr2	43225615	43225647	chr2.43225615	237.196	.	15910.2	17.962	17.072	5
chr13	95643848	95643952	chr13.95643848	237.17	.	15908.5	35.0524	33.806	0
chr3	133617178	133617201	chr3b.42617178	237.026	.	15898.8	12.6146	11.9004	0
chr8	144140547	144140573	chr8.144140547	236.859	.	15887.6	14.3944	13.6005	0
chr8	144316498	144316532	chr8.144316498	236.817	.	15884.8	11.8519	11.1677	2
chr2	219539252	219539301	chr2b.125539252	236.801	.	15883.7	16.8207	15.9528	3
chrX	119606196	119606476	chrX.119606196	236.733	.	15879.1	92.4478	88.4532	0
chr3	126630804	126630847	chr3b.35630804	236.643	.	15873.1	16.8397	15.9703	14
chr17	78854607	78854655	chr17.78854607	236.605	.	15870.5	27.5075	26.417	27
chr3	184176998	184177018	chr3b.93176998	236.547	.	15866.7	10.8384	10.2364	10
chr16	2103756	2103803	chr16.2103756	236.294	.	15849.6	26.91	25.8284	13
chr8	143247417	143247464	chr8.143247417	236.133	.	15838.9	26.91	25.8284	0
chr3	127606729	127606767	chr3b.36606729	236.125	.	15838.3	21.5374	20.5613	2
chr16	88808204	88808249	chr16.88808204	235.835	.	15818.9	25.7153	24.6519	37
chr13	109755057	109755162	chr13.109755057	235.807	.	15817	35.2439	33.9822	0
chr5	141320683	141320714	chr5b.57320683	235.793	.	15816.1	10.8536	10.2413	0
chr12	6935613	6935714	chr12.6935613	235.744	.	15812.8	33.9193	32.7297	8
chr8	144083765	144083805	chr8.144083765	235.709	.	15810.4	22.7304	21.727	0
chr13	73061718	73061823	chr13.73061718	235.667	.	15807.6	35.2439	33.9822	0
chr1	236551169	236551216	chr1b.111551169	235.577	.	15801.6	26.91	25.8284	0
chr9	127449316	127449335	chr9.127449316	235.286	.	15782.1	10.2473	9.7254	12
chr7	2256912	2256927	chr7.2256912	235.117	.	15770.7	7.88963	7.59127	0
chr5	62306237	62306275	chr5.62306237	235.098	.	15769.4	21.5374	20.5613	0
chr13	59937878	59937983	chr13.59937878	235.065	.	15767.2	35.2709	33.9822	0
chr7	99456887	99456928	chr7.99456887	234.975	.	15761.2	23.3271	22.3107	9
chr1	246209825	246209885	chr1b.121209825	234.94	.	15758.9	20.4491	19.4923	16
chr12	56612095	56612124	chr12.56612095	234.691	.	15742.1	16.1771	15.3264	23
chr2	27661068	27661091	chr2.27661068	234.552	.	15732.8	12.6146	11.9004	17
chr1	8014167	8014210	chr1.8014167	234.237	.	15711.7	24.521	23.4783	8
chr2	74462252	74462290	chr2.74462252	234.234	.	15711.5	21.5374	20.5613	0
chr9	134164481	134164493	chr9.134164481	234.199	.	15709.1	6.131	5.9951	4
chr3	141945742	141945783	chr3b.50945742	234.109	.	15703.1	23.3271	22.3107	9
chr1	180197469	180197519	chr1b.55197469	234.1	.	15702.5	17.1508	16.2804	15
chr3	51994902	51994940	chr3.51994902	234.055	.	15699.5	13.1817	12.4353	1
chr16	88734791	88734815	chr16.88734791	233.682	.	15674.5	13.2075	12.4588	4
chr3	98799475	98799511	chr3b.7799475	233.674	.	15674	20.3449	19.3975	0
chr11	61795634	61795660	chr11.61795634	233.643	.	15671.9	14.3944	13.6005	0
chr13	95640402	95640488	chr13.95640402	233.532	.	15664.4	33.0058	31.8361	0
chr13	43758887	43758973	chr13.43758887	233.532	.	15664.4	33.0058	31.8361	0
chr13	114117097	114117183	chr13.114117097	233.532	.	15664.4	33.0058	31.8361	0
chr13	101343212	101343298	chr13.101343212	233.532	.	15664.4	33.0058	31.8361	0
chr4	82844403	82844434	chr4.82844403	233.42	.	15656.9	10.8546	10.2413	0
chr13	33137897	33138000	chr13.33137897	233.405	.	15655.9	34.6226	33.4079	0
chr16	30357284	30357326	chr16.30357284	233.167	.	15639.9	23.924	22.8943	1
chr20	62307641	62307679	chr20.62307641	233.05	.	15632.1	21.5374	20.5613	9
chr20	44068866	44068919	chr20.44068866	233.048	.	15632	18.1411	17.2426	5
chr17	50090322	50090373	chr17.50090322	232.982	.	15627.5	17.481	16.5977	20
chr13	49500312	49500416	chr13.49500312	232.91	.	15622.7	34.97	33.7252	0
chr7	135618522	135618552	chr7.135618522	232.877	.	15620.5	16.7718	15.9116	5
chr3	134370849	134370886	chr3b.43370849	232.712	.	15609.4	12.8484	12.1116	26
chr15	96336033	96336064	chr15.96336033	232.037	.	15564.1	17.3668	16.4918	15
chr5	57237101	57237144	chr5.57237101	231.962	.	15559.1	24.521	23.4783	15
chr14	72670356	72670393	chr14.72670356	231.889	.	15554.2	20.941	19.9813	11
chr15	56918728	56918836	chr15.56918728	231.72	.	15542.9	36.2142	34.8681	0
chr20	45946306	45946349	chr20.45946306	231.645	.	15537.9	24.521	23.4783	19
chr13	112558254	112558300	chr13.112558254	231.575	.	15533.1	15.8298	14.9827	0
chrX	73844910	73844944	chrX.73844910	231.529	.	15530	19.1531	18.2327	12
chr11	64237508	64237554	chr11.64237508	231.319	.	15515.9	26.3126	25.2407	28
chr8	144496696	144496728	chr8.144496696	231.306	.	15515.1	17.962	17.072	0
chr17	40168239	40168284	chr17.40168239	231.265	.	15512.4	25.7153	24.6519	15
chr3	184172070	184172133	chr3b.93172070	231.109	.	15501.9	21.4372	20.4625	30
chr6	36923548	36923624	chr6.36923548	231.012	.	15495.4	25.7133	24.6511	1
chr6	150975789	150975854	chr6b.65975789	230.968	.	15492.4	22.0957	21.1072	0
chr9	128981289	128981335	chr9.128981289	230.853	.	15484.7	26.3126	25.2407	21
chr13	114002007	114002043	chr13.114002007	230.833	.	15483.3	14.1928	13.4019	12
chr7	100875268	100875323	chr7.100875268	230.572	.	15465.9	18.8012	17.8851	40
chr16	28830000	28830033	chr16.28830000	230.569	.	15465.6	18.5575	17.6525	11
chr11	67286066	67286135	chr11.67286066	230.394	.	15454	23.4118	22.3858	28
chr2	74529126	74529207	chr2.74529126	230.312	.	15448.5	27.356	26.2677	6
chr1	25815774	25815857	chr1.25815774	230.202	.	15441.1	28.0129	26.915	19
chr8	143920498	143920525	chr8.143920498	230.057	.	15431.3	14.9883	14.1694	10
chr8	143928509	143928528	chr8.143928509	230.055	.	15431.2	10.2473	9.7254	5
chr22	38730705	38730771	chr22.38730705	229.962	.	15425	22.4246	21.4231	24
chr6	2785064	2785110	chr6.2785064	229.818	.	15415.3	26.3126	25.2407	0
chr12	56601609	56601644	chr12.56601609	229.703	.	15407.6	19.7489	18.8154	0
chr8	143247281	143247351	chr8.143247281	229.365	.	15384.9	23.7406	22.7126	9
chr6	35426755	35426798	chr6.35426755	229.264	.	15378.1	24.521	23.4783	0
chr11	65636444	65636479	chr11.65636444	229.117	.	15368.3	19.7489	18.8154	31
chr5	176595866	176595898	chr5b.92595866	228.722	.	15341.8	17.962	17.072	13
chr6	43179131	43179194	chr6.43179131	228.599	.	15333.6	21.437	20.4625	15
chr5	134578592	134578637	chr5b.50578592	228.591	.	15333	25.7153	24.6519	8
chr22	36292071	36292129	chr22.36292071	228.582	.	15332.4	19.7899	18.8473	56
chr12	48938379	48938423	chr12.48938379	228.574	.	15331.8	25.1181	24.0645	0
chr8	22566437	22566456	chr8.22566437	228.446	.	15323.2	10.2473	9.7254	0
chr14	98973001	98973033	chr14.98973001	228.306	.	15313.9	17.962	17.072	5
chr22	21000039	21000107	chr22.21000039	228.21	.	15307.4	23.0827	22.0679	20
chr15	96332164	96332190	chr15.96332164	228.118	.	15301.2	14.3944	13.6005	1
chr6	131950524	131950547	chr6b.46950524	228.102	.	15300.2	12.6146	11.9004	10
chr1	58782034	58782170	chr1.58782034	228.016	.	15294.4	45.3852	42.9877	48
chrX	154535227	154535252	chrX.154535227	227.932	.	15288.8	13.8008	13.0317	18
chr14	95533476	95533526	chr14.95533476	227.724	.	15274.8	17.1508	16.2804	13
chr8	144099958	144099988	chr8.144099958	227.713	.	15274.1	16.7718	15.9116	14
chr5	150387964	150388002	chr5b.66387964	227.694	.	15272.8	21.5374	20.5613	0
chr7	44061088	44061143	chr7.44061088	227.642	.	15269.3	18.8009	17.8851	22
chr20	41204488	41204535	chr20.41204488	227.64	.	15269.2	26.91	25.8284	21
chrX	57596619	57596650	chrX.57596619	227.561	.	15263.9	17.3668	16.4918	0
chrX	154461452	154461483	chrX.154461452	227.512	.	15260.6	17.3668	16.4918	13
chr3	127606173	127606211	chr3b.36606173	227.491	.	15259.2	21.5374	20.5613	20
chr7	74122173	74122208	chr7.74122173	227.482	.	15258.6	19.7489	18.8154	3
chrX	73827366	73827399	chrX.73827366	227.38	.	15251.8	18.5575	17.6525	0
chr20	34742643	34742735	chr20.34742643	227.357	.	15250.2	30.9672	29.8456	42
chr8	22250596	22250662	chr8.22250596	227.314	.	15247.4	22.4246	21.4231	22
chr13	42317590	42317695	chr13.42317590	227.27	.	15244.4	35.2315	33.9822	0
chr12	6748068	6748097	chr12.6748068	227.158	.	15236.9	16.1771	15.3264	0
chr15	74449289	74449335	chr15.74449289	226.79	.	15212.2	15.8296	14.9827	7
chr2	97756929	97756967	chr2b.3756929	226.747	.	15209.3	21.5374	20.5613	0
chr7	99562971	99563013	chr7.99562971	226.715	.	15207.2	23.924	22.8943	14
chr9	116235182	116235225	chr9.116235182	226.538	.	15195.3	24.521	23.4783	21
chr17	77402525	77402570	chr17.77402525	226.52	.	15194	25.7153	24.6519	19
chr6	89868696	89868768	chr6b.4868696	226.467	.	15190.5	24.3985	23.3574	0
chr7	73700232	73700277	chr7.73700232	226.434	.	15188.3	25.7153	24.6519	25
chrX	154359833	154359864	chrX.154359833	226.368	.	15183.9	17.3668	16.4918	11
chr10	103445946	103445979	chr10.103445946	226.259	.	15176.6	18.5575	17.6525	5
chr12	2859025	2859100	chr12.2859025	226.194	.	15172.2	25.3846	24.3241	58
chr13	113857801	113857840	chr13.113857801	226.035	.	15161.5	13.5121	12.7462	0
chr3	123733039	123733079	chr3b.32733039	226.033	.	15161.4	22.7304	21.727	7
chr4	2939705	2939744	chr4.2939705	225.995	.	15158.8	13.5118	12.7462	7
chr7	66945125	66945166	chr7.66945125	225.984	.	15158.1	23.3271	22.3107	0
chr2	101272959	101272996	chr2b.7272959	225.91	.	15153.1	20.941	19.9813	19
chr19	38729441	38729491	chr19.38729441	225.899	.	15152.4	17.1509	16.2804	20
chr14	22981601	22981636	chr14.22981601	225.797	.	15145.6	19.7489	18.8154	18
chr9	127506456	127506489	chr9.127506456	225.714	.	15140	18.5575	17.6525	11
chr7	130201987	130202030	chr7.130201987	225.6	.	15132.3	24.521	23.4783	10
chr2	231708678	231708729	chr2b.137708678	225.519	.	15126.9	17.481	16.5977	9
chrX	63638119	63638157	chrX.63638119	225.406	.	15119.4	21.5374	20.5613	5
chr9	127506018	127506049	chr9.127506018	225.275	.	15110.5	17.3668	16.4918	13
chr3	49534862	49534898	chr3.49534862	225.264	.	15109.8	20.3449	19.3975	1
chr7	5500761	5500818	chr7.5500761	225.259	.	15109.5	19.4603	18.5296	37
chr15	90918231	90918270	chr15.90918231	225.254	.	15109.1	22.1338	21.1438	0
chr2	121338185	121338240	chr2b.27338185	225.181	.	15104.3	18.8009	17.8851	21
chr2	131052353	131052376	chr2b.37052353	224.933	.	15087.6	12.6146	11.9004	4
chr2	97803683	97803779	chr2b.3803683	224.884	.	15084.4	36.7509	35.4	0
chr17	77213955	77214111	chr17.77213955	224.796	.	15078.5	51.9298	49.2173	114
chr1	110043161	110043210	chr1.110043161	224.759	.	15075.9	28.1051	27.0058	9
chr2	86144499	86144514	chr2.86144499	224.363	.	15049.4	7.88963	7.59127	0
chr9	72364776	72364818	chr9.72364776	224.286	.	15044.3	23.924	22.8943	1
chr11	1757377	1757420	chr11.1757377	224.231	.	15040.5	24.521	23.4783	5
chrX	10128599	10128631	chrX.10128599	224.056	.	15028.8	17.962	17.072	7
chr12	132076559	132076591	chr12.132076559	224.026	.	15026.8	17.962	17.072	4
chr20	45420388	45420410	chr20.45420388	224.02	.	15026.4	12.022	11.3295	6
chr14	90540933	90540967	chr14.90540933	223.851	.	15015	19.1531	18.2327	15
chr3	47406000	47406026	chr3.47406000	223.826	.	15013.3	14.3944	13.6005	20
chr5	138391480	138391571	chr5b.54391480	223.776	.	15010	30.6391	29.5195	23
chr1	46028892	46028927	chr1.46028892	223.709	.	15005.5	19.7489	18.8154	8
chr2	238268132	238268165	chr2b.144268132	223.649	.	15001.5	18.5575	17.6525	11
chr11	64767238	64767261	chr11.64767238	223.637	.	15000.7	12.6146	11.9004	13
chr15	25438860	25438887	chr15.25438860	223.217	.	14972.5	14.9883	14.1694	19
chr14	104793901	104794102	chr14.104793901	223.104	.	14964.9	67.4641	64.1467	0
chr7	101131946	101131987	chr7.101131946	223.091	.	14964.1	23.3271	22.3107	13
chr13	114283806	114283909	chr13.114283806	222.799	.	14944.5	34.5759	33.3781	0
chr12	53286378	53286417	chr12.53286378	222.701	.	14937.9	22.1338	21.1438	21
chr11	76796066	76796196	chr11.76796066	222.543	.	14927.3	43.4209	41.117	70
chr13	110508111	110508132	chr13.110508111	222.49	.	14923.8	11.43	10.764	4
chr2	238091789	238091878	chr2b.144091789	222.413	.	14918.6	29.9827	28.8665	21
chr3	188179339	188179382	chr3b.97179339	222.091	.	14897	24.521	23.4783	0
chr3	51663081	51663168	chr3.51663081	222.077	.	14896.1	29.3262	28.2141	11
chr4	1947301	1947378	chr4.1947301	222.003	.	14891.1	29.6285	28.5143	24
chr5	150711146	150711186	chr5b.66711146	221.961	.	14888.2	22.7304	21.727	38
chr5	177442426	177442469	chr5b.93442426	221.889	.	14883.4	24.521	23.4783	0
chr1	113941051	113941155	chr1.113941051	221.761	.	14874.9	34.903	33.6863	103
chr6	142760129	142760174	chr6b.57760129	221.661	.	14868.1	25.7153	24.6519	11
chr12	54400920	54400953	chr12.54400920	221.415	.	14851.6	18.5575	17.6525	0
chr10	132782136	132782199	chr10.132782136	221.28	.	14842.6	21.4371	20.4625	25
chr14	104770780	104770823	chr14.104770780	221.23	.	14839.2	24.521	23.4783	20
chr3	184577381	184577419	chr3b.93577381	221.132	.	14832.6	14.9499	14.1331	1
chr4	2418426	2418463	chr4.2418426	220.775	.	14808.7	20.941	19.9813	0
chr1	16250923	16250966	chr1.16250923	220.476	.	14788.6	24.521	23.4783	0
chr4	26321673	26321706	chr4.26321673	220.301	.	14776.9	18.5575	17.6525	8
chr10	102480427	102480462	chr10.102480427	220.295	.	14776.5	19.7489	18.8154	24
chr4	83107836	83107863	chr4.83107836	220.183	.	14769	14.9883	14.1694	0
chr1	109928875	109929021	chr1.109928875	220.182	.	14768.9	48.658	46.1052	29
chr11	134178682	134178737	chr11.134178682	220.179	.	14768.7	18.8009	17.8851	0
chr11	70407591	70407637	chr11.70407591	220.105	.	14763.8	15.8292	14.9827	14
chr15	43894160	43894201	chr15.43894160	220.061	.	14760.8	23.3271	22.3107	16
chr1	24653012	24653047	chr1.24653012	219.89	.	14749.4	19.7489	18.8154	16
chr10	73799377	73799412	chr10.73799377	219.755	.	14740.3	19.7489	18.8154	11
chr4	1716210	1716248	chr4.1716210	219.694	.	14736.2	21.5374	20.5613	3
chr11	35139232	35139286	chr11.35139232	219.621	.	14731.3	18.471	17.5689	29
chr13	110677021	110677051	chr13.110677021	219.53	.	14725.2	16.7718	15.9116	2
chr7	99396084	99396187	chr7.99396084	219.419	.	14717.8	34.5751	33.3781	0
chr2	174562511	174562537	chr2b.80562511	219.406	.	14716.9	14.3944	13.6005	21
chr7	102469621	102469651	chr7.102469621	219.378	.	14715	16.7718	15.9116	5
chr3	99708433	99708536	chr3b.8708433	219.372	.	14714.6	34.5756	33.3781	0
chr7	128858802	128858843	chr7.128858802	219.343	.	14712.7	23.3271	22.3107	13
chr9	35689851	35689872	chr9.35689851	219.157	.	14700.2	11.43	10.764	14
chr5	34761638	34761683	chr5.34761638	218.735	.	14671.9	17.5948	16.7081	0
chr9	135501051	135501081	chr9.135501051	218.729	.	14671.5	16.7718	15.9116	16
chr5	641546	641643	chr5.641546	218.724	.	14671.2	32.6078	31.4615	0
chr1	32771542	32771589	chr1.32771542	218.716	.	14670.6	26.91	25.8284	15
chr13	97979462	97979560	chr13.97979462	218.663	.	14667	32.9369	31.7873	0
chr20	44065926	44066011	chr20.44065926	218.624	.	14664.4	28.6696	27.5631	57
chr10	100913016	100913034	chr10.100913016	218.587	.	14661.9	9.65682	9.18443	0
chrX	49250345	49250392	chrX.49250345	218.557	.	14660	26.91	25.8284	4
chr16	23683920	23684016	chr16.23683920	218.479	.	14654.7	32.2795	31.1359	71
chr13	113851943	113851967	chr13.113851943	218.122	.	14630.8	13.2075	12.4588	0
chr6	41935957	41935998	chr6.41935957	218.089	.	14628.5	23.3271	22.3107	4
chr2	73226085	73226158	chr2.73226085	218.061	.	14626.7	24.7272	23.6763	48
chr19	18569017	18569076	chr19.18569017	218.022	.	14624.1	20.1195	19.1743	35
chr5	69171300	69171335	chr5.69171300	217.933	.	14618.1	19.7489	18.8154	7
chr9	127935248	127935294	chr9.127935248	217.836	.	14611.6	26.3126	25.2407	20
chr1	113973333	113973369	chr1.113973333	217.822	.	14610.7	20.3449	19.3975	12
chr7	143382391	143382429	chr7.143382391	217.667	.	14600.2	21.5374	20.5613	0
chr2	73607435	73607471	chr2.73607435	217.534	.	14591.4	14.1928	13.4019	22
chr12	49796140	49796283	chr12.49796140	217.394	.	14582	47.6763	45.1683	60
chr12	57225578	57225622	chr12.57225578	217.173	.	14567.1	25.1181	24.0645	0
chr17	47824277	47824335	chr17.47824277	217.169	.	14566.9	19.7899	18.8473	9
chr3	127017567	127017705	chr3b.36017567	217.062	.	14559.6	46.0399	43.6183	6
chr11	46428688	46428726	chr11.46428688	216.99	.	14554.9	21.5374	20.5613	0
chr2	202377036	202377069	chr2b.108377036	216.953	.	14552.4	18.5575	17.6525	0
chr14	73715788	73715876	chr14.73715788	216.923	.	14550.4	29.6544	28.5401	33
chr12	48941067	48941097	chr12.48941067	216.84	.	14544.8	16.7718	15.9116	21
chr8	37697156	37697223	chr8.37697156	216.792	.	14541.6	22.7537	21.7402	33
chr15	32771888	32771925	chr15.32771888	216.747	.	14538.5	14.5717	13.7603	17
chr1	156123747	156123790	chr1b.31123747	216.736	.	14537.8	24.521	23.4783	12
chr9	130884761	130884869	chr9.130884761	216.734	.	14537.7	36.2142	34.8681	49
chr2	131520397	131520431	chr2b.37520397	216.709	.	14536	19.1531	18.2327	10
chr10	123154438	123154472	chr10.123154438	216.677	.	14533.9	19.1531	18.2327	9
chr2	96297700	96297727	chr2b.2297700	216.633	.	14530.9	14.9883	14.1694	11
chr4	1212343	1212371	chr4.1212343	216.577	.	14527.2	15.5826	14.7463	9
chr6	43143463	43143639	chr6.43143463	216.546	.	14525	58.4707	55.5325	4
chrX	54810050	54810091	chrX.54810050	216.485	.	14521	23.3271	22.3107	0
chr2	218664441	218664503	chr2b.124664441	216.404	.	14515.5	21.1077	20.1366	0
chr10	95621122	95621172	chr10.95621122	216.34	.	14511.2	17.1508	16.2804	29
chr22	41434865	41434896	chr22.41434865	216.287	.	14507.7	17.3668	16.4918	21
chr14	102507330	102507376	chr14.102507330	216.136	.	14497.6	26.3126	25.2407	2
chr16	28835329	28835349	chr16.28835329	216.123	.	14496.7	10.8384	10.2364	0
chr16	67658177	67658239	chr16.67658177	216.039	.	14491	21.1077	20.1366	51
chr2	174571883	174571925	chr2b.80571883	216.012	.	14489.2	14.5058	13.6973	11
chr17	2043142	2043237	chr17.2043142	216.01	.	14489.1	31.9515	30.811	42
chr5	112160951	112160979	chr5b.28160951	215.99	.	14487.8	15.5826	14.7463	0
chr10	24546004	24546044	chr10.24546004	215.956	.	14485.5	22.7304	21.727	2
chr6	116278512	116278542	chr6b.31278512	215.862	.	14479.2	16.7718	15.9116	2
chr2	26135791	26135835	chr2.26135791	215.662	.	14465.8	25.1181	24.0645	2
chr1	156136992	156137012	chr1b.31136992	215.52	.	14456.3	10.8384	10.2364	0
chr17	40356228	40356335	chr17.40356228	215.507	.	14455.3	35.8864	34.5455	47
chr7	40094198	40094233	chr7.40094198	215.388	.	14447.4	19.7489	18.8154	0
chr5	74640022	74640060	chr5.74640022	215.347	.	14444.6	21.5374	20.5613	0
chrX	72145396	72145464	chrX.72145396	215.272	.	14439.6	23.0827	22.0679	0
chr6	17760718	17760770	chr6.17760718	215.204	.	14435	17.8111	16.9242	21
chr7	149879405	149879473	chr7.149879405	215.15	.	14431.4	23.0827	22.0679	41
chr2	109503172	109503213	chr2b.15503172	215.06	.	14425.4	16.0844	15.236	1
chr4	7055483	7055535	chr4.7055483	214.991	.	14420.8	17.8111	16.9242	0
chr9	129095266	129095315	chr9.129095266	214.961	.	14418.7	28.1051	27.0058	0
chr6	26123534	26123558	chr6.26123534	214.906	.	14415.1	13.2075	12.4588	21
chr4	1024623	1024656	chr4.1024623	214.791	.	14407.3	18.5575	17.6525	6
chr8	18532944	18532990	chr8.18532944	214.757	.	14405.1	26.3126	25.2407	11
chr3	186787192	186787232	chr3b.95787192	214.747	.	14404.4	22.7304	21.727	18
chr9	136476314	136476350	chr9.136476314	214.562	.	14392	20.3449	19.3975	29
chr8	41308804	41308820	chr8.41308804	214.503	.	14388	8.4779	8.14119	0
chr5	176507148	176507200	chr5b.92507148	214.343	.	14377.3	17.8114	16.9242	12
chr9	127942926	127942968	chr9.127942926	214.205	.	14368.1	23.924	22.8943	0
chr4	1983640	1983668	chr4.1983640	214.138	.	14363.6	15.5826	14.7463	3
chr2	74556887	74556924	chr2.74556887	214.122	.	14362.4	20.941	19.9813	19
chr2	163675906	163675954	chr2b.69675906	214.059	.	14358.2	18.7262	17.8114	0
chr3	127003345	127003382	chr3b.36003345	213.967	.	14352.1	20.941	19.9813	7
chr6	36686638	36686664	chr6.36686638	213.938	.	14350.1	14.3944	13.6005	0
chr13	75481319	75481424	chr13.75481319	213.844	.	14343.8	35.2315	33.9822	0
chr4	1823045	1823078	chr4.1823045	213.791	.	14340.3	11.5194	10.8436	25
chr9	137083530	137083618	chr9.137083530	213.778	.	14339.4	29.6545	28.5401	47
chr7	66903519	66903559	chr7.66903519	213.681	.	14332.9	22.7304	21.727	27
chr5	179801618	179801649	chr5b.95801618	213.674	.	14332.4	17.3668	16.4918	0
chr5	180790698	180790767	chr5b.96790698	213.59	.	14326.8	23.4117	22.3858	22
chr21	44331263	44331340	chr21.44331263	213.523	.	14322.3	27.7059	26.6085	0
chrX	54815412	54815431	chrX.54815412	213.518	.	14322	10.2473	9.7254	6
chr2	218643428	218643447	chr2b.124643428	213.517	.	14321.9	10.2473	9.7254	0
chr13	113853878	113853983	chr13.113853878	213.286	.	14306.4	35.2315	33.9822	0
chr9	136728060	136728092	chr9.136728060	213.229	.	14302.5	17.962	17.072	18
chr2	218642789	218642811	chr2b.124642789	213.155	.	14297.6	12.022	11.3295	0
chr13	98021951	98021978	chr13.98021951	213.106	.	14294.3	14.9883	14.1694	6
chrX	72146976	72147109	chrX.72146976	213.088	.	14293.1	44.4032	42.0513	0
[truncated: 37,462 more rows]

## Sheet: JAMM_VA13_hTR_2
Chrom	Start	End	Name	Score	Strand	Peak score	pVal	qVal	Point-source
chr10	17229444	17229739	chr10.17229444	10000	.	526790	97.3445	93.4792	98
chr4	2249454	2249785	chr4.2249454	9145.11	.	481755	109.096	105.016	222
chr7	5528341	5528732	chr7.5528341	8677.82	.	457139	128.675	124.157	377
chr1	109100240	109100584	chr1.109100240	6344.44	.	334219	113.338	109.063	317
chr5	80651494	80651539	chr5.80651494	5640.89	.	297156	25.7153	24.7214	22
chr14	20343178	20343365	chr14.20343178	4953.41	.	260940	62.0669	59.2016	140
chr13	45341096	45341142	chr13.45341096	4754.23	.	250448	26.3126	25.3116	24
chr21	37202377	37202546	chr21.37202377	4004.37	.	210946	56.1817	53.4909	82
chr9	35657834	35657933	chr9.35657834	3810.12	.	200713	33.2635	32.2075	87
chrX	154348700	154348844	chrX.154348700	3554.02	.	187222	48.0035	45.7373	82
chr13	45340129	45340181	chr13.45340129	3550.29	.	187026	17.8111	16.9752	51
chrX	154354937	154355006	chrX.154354937	3416.73	.	179990	23.4117	22.4523	41
chr22	36282431	36282667	chr22.36282431	2585.59	.	136207	78.0782	74.6652	160
chr3	129314830	129315078	chr3b.38314830	2581.55	.	135993	81.9977	78.4682	30
chr12	6537609	6538002	chr12.6537609	2433.84	.	128212	118.641	114.22	59
chr17	81511221	81511637	chr17.81511221	2396.42	.	126241	136.832	132.012	75
chr8	143915876	143915985	chr8.143915876	2395.8	.	126208	36.5419	35.4166	59
chr6	26056040	26056104	chr6.26056040	2351.1	.	123854	21.7663	20.8376	45
chr2	84906386	84906648	chr2.84906386	2343.77	.	123467	45.4803	43.3032	144
chr13	45340752	45340808	chr13.45340752	2143.12	.	112898	19.1306	18.2634	17
chr3	184183603	184183720	chr3b.93183603	2128.97	.	112152	39.1633	37.9511	99
chr18	49814058	49814151	chr18.49814058	2122.7	.	111822	31.2953	30.2533	11
chr18	49814326	49814421	chr18.49814326	2103.99	.	110836	31.9514	30.9042	55
chr3	184321488	184321625	chr3b.93321488	2082.81	.	109720	45.7125	43.5344	42
chr8	130060802	130060973	chr8.130060802	1982.53	.	104438	56.8357	54.12	30
chrX	65741048	65741250	chrX.65741048	1944.63	.	102441	66.9696	63.9696	45
chr8	143930379	143930578	chr8.143930379	1840.64	.	96963.1	65.9892	63.0178	73
chrX	154399888	154399940	chrX.154399888	1783.27	.	93940.8	17.8111	16.9752	27
chr7	5527356	5527447	chr7.5527356	1720.71	.	90645.3	30.639	29.6008	49
chr6	26156653	26156699	chr6.26156653	1638.72	.	86325.9	26.3126	25.3116	5
chr13	29514297	29514412	chr13.29514297	1637.34	.	86253.2	38.5081	37.307	60
chr15	72199095	72199157	chr15.72199095	1624.2	.	85561.5	21.1077	20.191	17
chr16	30070041	30070362	chr16.30070041	1608.66	.	84742.9	56.3934	53.6862	215
chr11	65505472	65505640	chr11.65505472	1577.33	.	83092	55.8547	53.1797	111
chr6	113857454	113857530	chr6b.28857454	1575.83	.	83013.4	25.7132	24.7206	35
chr5	72198593	72198726	chr5.72198593	1573.26	.	82877.8	44.4031	42.2851	67
chr15	69452888	69452979	chr15.69452888	1551.14	.	81712.5	30.639	29.6008	52
chrX	154367472	154367520	chrX.154367472	1523.33	.	80247.5	27.5075	26.491	25
chr7	5527777	5527876	chr7.5527777	1507.86	.	79432.8	33.2635	32.2075	78
chr1	152032564	152032630	chr1b.27032564	1492.74	.	78636.3	22.4246	21.4863	9
chr13	110512089	110512140	chr13.110512089	1480.08	.	77969.3	17.4811	16.6508	14
chr4	2250414	2250623	chr4.2250414	1472.22	.	77554.9	69.2571	66.1779	32
chr1	156114762	156114978	chr1b.31114762	1429.54	.	75306.5	71.5444	68.3532	58
chr8	100706740	100706789	chr8.100706740	1380.16	.	72705.2	28.1051	27.0817	25
chr8	143925614	143925907	chr8.143925614	1378.43	.	72614.4	96.6916	92.872	262
chr6	73518741	73518811	chr6.73518741	1366.61	.	71991.6	23.7406	22.7791	26
chr8	143921914	143922138	chr8.143921914	1331.93	.	70164.9	74.1581	70.8949	46
chrX	154349509	154349555	chrX.154349509	1309.11	.	68962.6	26.3126	25.3116	44
chr2	96253553	96253764	chr2b.2253553	1260.15	.	66383.3	69.9106	66.7901	27
chrX	154360068	154360149	chrX.154360068	1204.55	.	63454.5	27.356	26.3413	36
chr3	184317443	184317496	chr3b.93317443	1182.49	.	62292.3	18.1411	17.293	45
chr2	215375229	215375432	chr2b.121375229	1162.9	.	61260.2	47.4676	45.2256	126
chr2	237340923	237341089	chr2b.143340923	1156.93	.	60946.1	55.2006	52.5658	123
chr1	201483608	201483794	chr1b.76483608	1156.68	.	60932.9	61.74	58.8842	129
chr6	44253631	44253733	chr6.44253631	1155.49	.	60870.3	34.2472	33.1738	57
chr18	47868384	47868423	chr18.47868384	1150.24	.	60593.6	22.1338	21.2017	8
chr14	68874755	68874878	chr14.68874755	1139.65	.	60035.7	41.1287	39.7862	80
chr6	157201330	157201402	chr6b.72201330	1112.39	.	58599.7	24.3983	23.4253	22
chr18	35140635	35140679	chr18.35140635	1094.53	.	57658.9	25.1181	24.1339	16
chr1	159918400	159918533	chr1b.34918400	1073	.	56524.5	44.4031	42.2851	88
chr8	143917630	143917792	chr8.143917630	1072.65	.	56506	53.8924	51.3618	83
chr6	44253298	44253332	chr6.44253298	1068.27	.	56275.2	19.1531	18.2835	23
chr12	56117642	56117703	chr12.56117642	1067.64	.	56242.3	20.7784	19.8711	27
chr11	65892973	65893019	chr11.65892973	1061.77	.	55932.8	26.3126	25.3116	30
chr8	143918329	143918463	chr8.143918329	1053.66	.	55505.7	44.7305	42.5931	23
chr8	144791359	144791448	chr8.144791359	1051.99	.	55417.9	29.9827	28.9477	51
chrX	53379809	53380219	chrX.53379809	1051.84	.	55409.9	134.874	130.231	42
chrX	153861888	153862103	chrX.153861888	1049.07	.	55264.1	71.2176	68.0416	27
chr10	97432544	97432582	chr10.97432544	1031.13	.	54318.9	21.5374	20.6168	32
chr2	215372108	215372391	chr2b.121372108	1024.21	.	53954.3	70.9808	67.8096	205
chr9	125240728	125240797	chr9.125240728	1023.88	.	53937.2	23.4117	22.4523	25
chr6	26204641	26204761	chr6.26204641	1010.19	.	53215.7	40.1461	38.8944	25
chr5	72199719	72199807	chr5.72199719	1009.89	.	53199.8	29.6544	28.621	30
chr1	151400071	151400119	chr1b.26400071	1004.03	.	52891	27.5075	26.491	5
chr7	143390775	143390867	chr7.143390775	998.699	.	52610.4	30.9672	29.9265	45
chr11	74254438	74254497	chr11.74254438	994.671	.	52398.3	20.1195	19.2257	19
chrX	154364665	154364701	chrX.154364665	994.051	.	52365.6	20.3449	19.4479	19
chr12	6935671	6935899	chr12.6935671	991.901	.	52252.4	75.4649	72.1638	50
chr12	6536718	6536817	chr12.6536718	990.656	.	52186.8	33.2635	32.2075	66
chr9	110136267	110136320	chr9.110136267	990.471	.	52177	18.1411	17.293	22
chr5	179836748	179836815	chr5b.95836748	989.534	.	52127.7	22.7537	21.8055	33
chr15	96337405	96337559	chr15.96337405	983.585	.	51814.3	51.2755	48.8976	26
chr10	102643743	102644008	chr10.102643743	979.359	.	51591.6	87.5494	83.934	178
chr3	185824865	185824942	chr3b.94824865	942.794	.	49665.4	26.042	25.0428	31
chr1	43591253	43591380	chr1.43591253	935.675	.	49290.4	42.4386	40.9499	69
chr20	24963892	24963964	chr20.24963892	933.63	.	49182.7	24.3983	23.4253	40
chr8	144312005	144312163	chr8.144312005	931.815	.	49087.1	52.584	50.0979	10
chr9	35689787	35689871	chr9.35689787	930.601	.	49023.1	28.3412	27.3145	46
chr5	17275773	17275814	chr5.17275773	919.468	.	48436.6	23.3271	22.3748	30
chr16	88734748	88734956	chr16.88734748	915.596	.	48232.7	68.9304	65.8667	175
chr5	177491000	177491108	chr5b.93491000	913.396	.	48116.8	36.2142	35.0931	59
chr12	6537176	6537222	chr12.6537176	912.977	.	48094.7	26.3126	25.3116	33
chr13	113820892	113821002	chr13.113820892	912.144	.	48050.9	36.8697	35.7396	41
chr6	27867175	27867222	chr6.27867175	907.589	.	47810.9	26.91	25.9017	15
chr19	41259735	41260006	chr19.41259735	902.096	.	47521.5	89.5086	85.8194	95
chr7	2661837	2662129	chr7.2661837	901.452	.	47487.6	96.3651	92.5667	59
chr13	113322348	113322439	chr13.113322348	898.52	.	47333.1	30.639	29.6008	80
chr6	27892887	27893062	chr6.27892887	882.098	.	46468	58.1437	55.3942	7
chr18	12325456	12325551	chr18.12325456	880.077	.	46361.6	31.9514	30.9042	23
chr8	143992963	143993021	chr8.143992963	876.113	.	46152.7	19.7899	18.8991	2
chr13	29513144	29513199	chr13.29513144	874.431	.	46064.1	18.8009	17.937	20
chr18	49489424	49489467	chr18.49489424	870.597	.	45862.2	24.521	23.5468	4
chr7	5529589	5529666	chr7.5529589	866.847	.	45664.6	26.0419	25.0428	69
chr8	143923382	143923480	chr8.143923382	861.873	.	45402.6	32.9355	31.8817	52
chr7	5529334	5529379	chr7.5529334	859.881	.	45297.7	25.7153	24.7214	42
chr12	6870395	6870512	chr12.6870395	840.994	.	44302.7	39.1634	37.9511	87
chr16	2519748	2519793	chr16.2519748	839.98	.	44249.3	25.7153	24.7214	8
chrX	154354451	154354477	chrX.154354451	838.866	.	44190.6	14.3944	13.6658	10
chr2	231712938	231712995	chr2b.137712938	833.412	.	43903.3	19.4603	18.5815	2
chr9	125241048	125241235	chr9.125241048	833.217	.	43893	62.0669	59.2016	38
chr9	137242738	137242790	chr9.137242738	829.842	.	43715.2	17.8111	16.9752	30
chr11	62790553	62790749	chr11.62790553	824.034	.	43409.3	65.0087	62.0554	74
chrX	154360329	154360387	chrX.154360329	823.162	.	43363.4	19.7901	18.8991	22
chrX	41347929	41347985	chrX.41347929	821.89	.	43296.4	19.1306	18.2634	11
chr6	148544432	148544624	chr6b.63544432	816.939	.	43035.5	63.7013	60.7875	32
chr12	55727210	55727260	chr12.55727210	815.228	.	42945.4	17.1508	16.3326	4
chr8	143925330	143925459	chr8.143925330	811.675	.	42758.2	43.0936	41.3842	91
chr3	184174926	184174966	chr3b.93174926	811.559	.	42752.1	22.7304	21.7899	27
chr2	215435902	215435955	chr2b.121435902	808.236	.	42577.1	18.1411	17.293	27
chr4	7760909	7761073	chr4.7760909	806.204	.	42470	54.5465	51.9392	20
chr7	5528131	5528172	chr7.5528131	797.38	.	42005.2	23.3271	22.3748	38
chr3	124968113	124968178	chr3b.33968113	796.053	.	41935.3	22.0955	21.1652	32
chr13	44575460	44575625	chr13.44575460	790.709	.	41653.7	54.8736	52.2513	131
chr8	38060174	38060233	chr8.38060174	785.789	.	41394.6	20.1195	19.2257	9
chr2	70088256	70088403	chr2.70088256	781.75	.	41181.8	48.9852	46.6933	129
chr6	158095854	158095898	chr6b.73095854	779.936	.	41086.3	25.1181	24.1339	16
chr16	30069884	30070040	chr16.30069884	775.598	.	40857.7	51.9297	49.5038	135
chr3	50259020	50259204	chr3.50259020	775.425	.	40848.6	61.0862	58.2421	119
chr2	206160005	206160065	chr2b.112160005	764.021	.	40247.9	20.449	19.5439	36
chr5	138467074	138467220	chr5b.54467074	759.792	.	40025.1	48.658	46.38	33
chr4	2928609	2928716	chr4.2928609	758.749	.	39970.1	35.8864	34.7772	21
chr8	144356354	144356534	chr8.144356354	757.667	.	39913.1	59.7785	56.976	132
chr2	73075286	73075530	chr2.73075286	754.736	.	39758.8	80.6912	77.1939	28
chr17	7513147	7513486	chr17.7513147	753.762	.	39707.4	111.707	107.489	123
chr14	68789750	68789865	chr14.68789750	748.181	.	39413.4	38.5081	37.307	56
chr3	184317742	184317787	chr3b.93317742	745.177	.	39255.2	25.7153	24.7214	29
chr20	63521535	63521614	chr20.63521535	743.312	.	39156.9	26.699	25.6916	33
chr6	160047843	160047875	chr6b.75047843	740.313	.	38998.9	17.962	17.1233	5
chr7	100886377	100886476	chr7.100886377	740.204	.	38993.2	33.2635	32.2075	44
chr2	151410235	151410473	chr2b.57410235	739.735	.	38968.5	78.7315	75.2641	173
chr18	74520084	74520148	chr18.74520084	739.136	.	38936.9	21.7665	20.8376	31
chr9	88476393	88476434	chr9.88476393	736.491	.	38797.6	23.3271	22.3748	8
chrX	154400525	154400566	chrX.154400525	733.696	.	38650.3	23.3271	22.3748	0
chrX	47214937	47215023	chrX.47214937	730.03	.	38457.3	28.9979	27.9682	12
chr20	43716150	43716355	chr20.43716150	726.376	.	38264.7	67.95	64.9229	35
chr4	6641071	6641114	chr4.6641071	725.805	.	38234.7	24.521	23.5468	16
chr15	43793801	43793840	chr15.43793801	723.488	.	38112.6	22.1338	21.2017	14
chr9	35697578	35697773	chr9.35697578	721.088	.	37986.2	64.6818	61.7374	121
chr10	102141028	102141233	chr10.102141028	720.044	.	37931.2	67.95	64.9229	78
chr13	112558311	112558394	chr13.112558311	719.61	.	37908.4	28.0129	26.9907	46
chr1	54851366	54851559	chr1.54851366	714.253	.	37626.1	64.0281	61.1007	29
chr13	113860771	113860836	chr13.113860771	713.366	.	37579.4	22.0955	21.1652	14
chr1	39413754	39413965	chr1.39413754	711.46	.	37479	69.9107	66.7901	157
chr8	38413228	38413395	chr8.38413228	709.084	.	37353.8	55.5276	52.8665	125
chr12	6538142	6538262	chr12.6538142	706.567	.	37221.2	34.7454	33.6667	67
chr3	184334955	184335015	chr3b.93334955	704.989	.	37138.1	20.449	19.5439	26
chrX	47229331	47229497	chrX.47229331	698.693	.	36806.4	55.2006	52.5658	135
chr5	73498471	73498509	chr5.73498471	696.921	.	36713.1	21.5374	20.6168	27
chr6	148544234	148544368	chr6b.63544234	695.506	.	36638.6	45.6699	43.4923	31
chr11	65855111	65855201	chr11.65855111	690.357	.	36367.3	30.3109	29.2738	17
chr1	25815575	25815873	chr1.25815575	689.067	.	36299.4	98.3239	94.4338	185
chr13	26687504	26687552	chr13.26687504	688.858	.	36288.4	27.5075	26.491	16
chr21	44851197	44851297	chr21.44851197	686.556	.	36167.1	33.5914	32.5299	32
chr14	74781616	74781868	chr14.74781616	686.154	.	36145.9	83.3041	79.7398	64
chr3	58123208	58123249	chr3.58123208	681.053	.	35877.2	23.3271	22.3748	6
chr1	154157474	154157615	chr1b.29157474	680.554	.	35850.9	47.0217	44.7921	106
chr11	65920930	65920973	chr11.65920930	679.635	.	35802.5	24.521	23.5468	17
chr20	63521722	63521814	chr20.63521722	676.374	.	35630.7	30.9672	29.9265	48
chr6	121446994	121447034	chr6b.36446994	673.918	.	35501.3	22.7304	21.7899	16
chr4	10075342	10075374	chr4.10075342	664.481	.	35004.2	17.962	17.1233	18
chrX	65741581	65741644	chrX.65741581	662.909	.	34921.4	21.437	20.5182	22
chr8	26656581	26656642	chr8.26656581	662.262	.	34887.3	20.7784	19.8711	18
chr11	75404756	75404806	chr11.75404756	660.754	.	34807.8	17.1508	16.3326	26
chr5	179623061	179623106	chr5b.95623061	660.667	.	34803.3	25.7153	24.7214	20
chr12	6937044	6937129	chr12.6937044	658.925	.	34711.5	28.6696	27.6415	36
chr12	6770773	6770808	chr12.6770773	658.482	.	34688.2	19.7489	18.8671	11
chr11	66277113	66277208	chr11.66277113	657.316	.	34626.7	31.9514	30.9042	62
chr10	100360942	100360980	chr10.100360942	657.127	.	34616.8	21.5374	20.6168	19
chrX	12975151	12975171	chrX.12975151	653.918	.	34447.7	10.8384	10.3671	8
chr22	36348963	36349098	chr22.36348963	653.437	.	34422.4	45.0578	42.8982	14
chr18	28177295	28177574	chr18.28177295	651.551	.	34323.1	92.1208	88.3804	214
chr8	143916989	143917062	chr8.143916989	647.472	.	34108.2	24.7271	23.7462	40
chr3	188609310	188609358	chr3b.97609310	637.899	.	33603.9	27.5075	26.491	0
chr4	2247930	2248098	chr4.2247930	636.355	.	33522.5	55.8547	53.1797	41
chr12	6967370	6967517	chr12.6967370	634.905	.	33446.2	48.9852	46.6933	5
chr1	633975	634042	chr1.633975	632.234	.	33305.5	22.7537	21.8055	33
chr6	27146510	27146634	chr6.27146510	631.479	.	33265.7	41.4562	40.1073	64
chr1	26281202	26281280	chr1.26281202	631.126	.	33247.1	26.3705	25.3647	55
chr10	97457162	97457220	chr10.97457162	629.901	.	33182.6	19.7901	18.8991	35
chr8	143924060	143924140	chr8.143924060	629.484	.	33160.6	27.0275	26.0143	43
chr7	150373427	150373527	chr7.150373427	629.339	.	33153	33.5914	32.5299	39
chr6	158767393	158767439	chr6b.73767393	624.929	.	32920.6	26.3126	25.3116	38
chr5	31526487	31526642	chr5.31526487	624.125	.	32878.3	51.6026	49.1896	101
chr8	144527234	144527438	chr8.144527234	621.723	.	32751.7	67.6232	64.603	43
chr2	121338518	121338674	chr2b.27338518	616.287	.	32465.4	51.9297	49.5038	139
chrX	153948786	153948899	chrX.153948786	615.66	.	32432.4	37.8528	36.6929	74
chrX	47586659	47586700	chrX.47586659	614.809	.	32387.5	23.3271	22.3748	14
chr20	50082312	50082429	chr20.50082312	614.14	.	32352.3	39.1633	37.9511	79
chr1	149812063	149812110	chr1b.24812063	611.679	.	32222.6	26.91	25.9017	15
chr5	176392582	176392626	chr5b.92392582	610.323	.	32151.2	25.1181	24.1339	27
chr8	130092011	130092058	chr8.130092011	608.153	.	32036.9	26.91	25.9017	22
chr1	149926431	149926478	chr1b.24926431	604.428	.	31840.6	26.91	25.9017	0
chr9	127506968	127507202	chr9.127506968	600.818	.	31650.5	77.4249	74.0286	197
chr2	55049855	55049946	chr2.55049855	600.658	.	31642.1	30.639	29.6008	45
chr4	10099036	10099077	chr4.10099036	600.359	.	31626.3	23.3271	22.3748	6
chr22	42615305	42615349	chr22.42615305	599.324	.	31571.8	25.1181	24.1339	9
chr10	102657682	102657789	chr10.102657682	597.541	.	31477.9	35.8864	34.7772	76
chr6	26158464	26158526	chr6.26158464	596.435	.	31419.6	21.1077	20.191	37
chr6	108681436	108681481	chr6b.23681436	596.085	.	31401.2	25.7153	24.7214	4
chr9	129095258	129095403	chr9.129095258	594.231	.	31303.5	48.3308	46.0596	74
chr10	100347194	100347224	chr10.100347194	593.487	.	31264.3	16.7718	15.9641	0
chr1	180196345	180196400	chr1b.55196345	592.421	.	31208.1	18.8009	17.937	16
chr1	93346245	93346513	chr1.93346245	591.559	.	31162.8	88.529	84.8709	175
chrX	47228784	47228842	chrX.47228784	590.603	.	31112.4	19.7899	18.8991	26
chr12	6870665	6870705	chr12.6870665	587.255	.	30936	22.7304	21.7899	16
chr18	8769703	8769917	chr18.8769703	586.594	.	30901.2	76.0083	72.6724	47
chr14	22846830	22846875	chr14.22846830	585.61	.	30849.4	25.7153	24.7214	21
chr7	135977083	135977218	chr7.135977083	582.606	.	30691.1	45.0578	42.8982	30
chr4	2928819	2928905	chr4.2928819	579.428	.	30523.7	28.9979	27.9682	10
chr6	26124262	26124297	chr6.26124262	579.264	.	30515.1	19.7489	18.8671	28
chr1	149923536	149923727	chr1b.24923536	579.147	.	30508.9	63.3744	60.4713	22
chr10	97715124	97715273	chr10.97715124	571.526	.	30107.4	49.6396	47.3086	85
chr22	42619294	42619470	chr22.42619294	570.837	.	30071.1	58.4706	55.7099	29
chr2	43225071	43225230	chr2.43225071	570.287	.	30042.1	52.9111	50.4086	13
chr13	44989143	44989242	chr13.44989143	568.948	.	29971.6	33.2636	32.2075	2
chr9	134843496	134843699	chr9.134843496	567.43	.	29891.6	67.2964	64.2796	0
chr14	102029588	102029632	chr14.102029588	566.75	.	29855.8	25.1181	24.1339	7
chr5	38933323	38933425	chr5.38933323	566.473	.	29841.3	34.2472	33.1738	24
chr1	154207472	154207612	chr1b.29207472	564.618	.	29743.5	46.6944	44.4829	93
chr6	113860500	113860537	chr6b.28860500	563.546	.	29687	20.941	20.032	3
chr1	150294251	150294309	chr1b.25294251	562.23	.	29617.7	19.7899	18.8991	38
chr2	27041353	27041521	chr2.27041353	560.179	.	29509.7	55.8547	53.1797	70
chr10	74095751	74095795	chr10.74095751	558.952	.	29445	25.1181	24.1339	14
chr20	36549631	36549693	chr20.36549631	558.101	.	29400.2	21.1078	20.191	24
chr3	23917932	23917970	chr3.23917932	557.354	.	29360.8	21.5374	20.6168	0
chr6	38703033	38703088	chr6.38703033	556.941	.	29339.1	18.8009	17.937	7
chrX	10567375	10567498	chrX.10567375	555.176	.	29246.1	41.1287	39.7862	57
chr5	917504	917548	chr5.917504	554.955	.	29234.5	25.1181	24.1339	5
chr5	154815643	154815849	chr5b.70815643	553.076	.	29135.5	68.2768	65.2354	136
chr5	147391435	147391516	chr5b.63391435	552.062	.	29082.1	27.356	26.3413	37
chr2	74361294	74361350	chr2.74361294	551.614	.	29058.5	19.1306	18.2634	44
chr16	2767763	2767856	chr16.2767763	548.398	.	28889.1	31.2953	30.2533	79
chr11	65423457	65423694	chr11.65423457	548.005	.	28868.4	78.4048	74.9655	206
chr2	174571799	174571911	chr2b.80571799	545.449	.	28733.7	37.5251	36.3709	45
chr13	110485716	110485756	chr13.110485716	544.597	.	28688.8	22.7304	21.7899	0
chr3	134370879	134370915	chr3b.43370879	543.625	.	28637.6	20.3449	19.4479	0
chr2	215371943	215372074	chr2b.121371943	543.402	.	28625.9	39.0165	37.8046	30
chrX	153862416	153862580	chrX.153862416	542.236	.	28564.4	54.5465	51.9392	24
chr5	179774508	179774672	chr5b.95774508	540.566	.	28476.5	54.5465	51.9392	105
chr9	129006689	129006871	chr9.129006689	538.659	.	28376	60.4323	57.6128	81
chr6	52498420	52498486	chr6.52498420	537.517	.	28315.9	22.4246	21.4863	18
chr3	127604922	127605076	chr3b.36604922	537.211	.	28299.8	51.2755	48.8976	138
chr18	59697361	59697442	chr18.59697361	537.157	.	28296.9	27.356	26.3413	32
chr13	60163613	60163665	chr13.60163613	537.109	.	28294.4	20.2335	19.3376	10
chr8	143991910	143992069	chr8.143991910	536.369	.	28255.4	52.9111	50.4086	30
chr3	47845775	47845808	chr3.47845775	536.364	.	28255.1	18.5575	17.7032	0
chr16	28835586	28835699	chr16.28835586	534.625	.	28163.5	37.8528	36.6929	18
chr14	99514481	99514617	chr14.99514481	534.558	.	28160	45.3852	43.212	32
chr2	96297499	96297524	chr2b.2297499	534.324	.	28147.6	13.8008	13.1037	23
chr5	177483447	177483503	chr5b.93483447	531.118	.	27978.8	19.1306	18.2634	12
chr18	49490520	49490545	chr18.49490520	530.346	.	27938.1	13.8008	13.1037	11
chr5	73447005	73447044	chr5.73447005	530.131	.	27926.7	22.1338	21.2017	4
chr7	99365933	99365984	chr7.99365933	528.81	.	27857.2	17.481	16.6508	22
chrX	154019252	154019359	chrX.154019252	528.45	.	27838.2	35.8864	34.7772	61
chr1	149852713	149852743	chr1b.24852713	528.171	.	27823.5	16.7718	15.9641	5
chr13	113854571	113854704	chr13.113854571	526.116	.	27715.3	44.4031	42.2851	0
chr8	133238076	133238114	chr8.133238076	525.23	.	27668.6	21.5374	20.6168	23
chr3	47410193	47410357	chr3.47410193	525.021	.	27657.6	54.5465	51.9392	29
chr13	49198411	49198454	chr13.49198411	524.332	.	27621.3	24.521	23.5468	27
chr11	66003917	66004066	chr11.66003917	523.448	.	27574.7	49.6396	47.3086	117
chr12	55726945	55726985	chr12.55726945	523.445	.	27574.5	22.7304	21.7899	15
chr8	100721777	100721834	chr8.100721777	521.49	.	27471.6	19.4603	18.5815	53
chr8	66429383	66429428	chr8.66429383	521.325	.	27462.9	25.7153	24.7214	29
chr13	113832451	113832488	chr13.113832451	520.904	.	27440.7	20.941	20.032	8
chr6	89146197	89146323	chr6b.4146197	520.849	.	27437.8	42.1111	40.6958	6
chr4	17811046	17811090	chr4.17811046	519.626	.	27373.4	25.1181	24.1339	0
chrX	154352318	154352365	chrX.154352318	518.972	.	27338.9	26.91	25.9017	5
chr6	130890343	130890387	chr6b.45890343	518.707	.	27324.9	25.1181	24.1339	10
chr13	46052519	46052560	chr13.46052519	517.908	.	27282.9	16.0842	15.2959	0
chr13	114325370	114325397	chr13.114325370	517.767	.	27275.4	14.9883	14.2361	4
chr18	32413187	32413222	chr18.32413187	517.516	.	27262.2	19.7489	18.8671	10
chr3	47410815	47411004	chr3.47410815	517.419	.	27257.1	62.7207	59.8356	57
chr6	34245127	34245149	chr6.34245127	517.411	.	27256.7	12.022	11.4053	0
chr12	15882530	15882741	chr12.15882530	517.034	.	27236.8	69.9106	66.7901	181
chr22	24542476	24542779	chr22.24542476	516.877	.	27228.5	99.9561	96.0116	69
chr5	73446650	73446720	chr5.73446650	516.278	.	27197	23.7406	22.7791	0
chr2	226797693	226797851	chr2b.132797693	515.26	.	27143.4	52.584	50.0979	0
chr14	102049830	102049872	chr14.102049830	514.482	.	27102.4	23.924	22.9607	18
chr10	73760098	73760201	chr10.73760098	512.803	.	27013.9	34.5751	33.4983	41
chr13	113979188	113979231	chr13.113979188	511.763	.	26959.1	24.521	23.5468	17
chr1	85580972	85581033	chr1.85580972	511.459	.	26943.1	20.7784	19.8711	52
chr4	40815746	40815802	chr4.40815746	510.982	.	26918	19.1306	18.2634	19
chr15	43746472	43746528	chr15.43746472	510.728	.	26904.6	19.1306	18.2634	11
chr6	43505269	43505577	chr6.43505269	509.991	.	26865.8	101.588	97.6139	37
chr6	131949296	131949565	chr6b.46949296	509.196	.	26824	88.8556	85.1822	23
chr7	100477682	100477889	chr7.100477682	508.9	.	26808.3	68.6036	65.5512	143
chr11	69648023	69648085	chr11.69648023	505.838	.	26647	21.1077	20.191	27
chrX	154362302	154362323	chrX.154362302	504.707	.	26587.5	11.43	10.8788	4
chr10	68210862	68210925	chr10.68210862	502.897	.	26492.1	21.4371	20.5182	0
chr1	205791198	205791339	chr1b.80791198	502.85	.	26489.6	47.0218	44.7921	44
chrX	65740882	65740943	chrX.65740882	502.622	.	26477.6	20.7785	19.8711	34
chr1	230280972	230281151	chr1b.105280972	499.45	.	26310.5	59.4515	56.6634	6
chr7	100107315	100107536	chr7.100107315	498.335	.	26251.8	73.178	69.955	193
chr6	26273064	26273163	chr6.26273064	496.081	.	26133	33.2635	32.2075	86
chrX	49030035	49030140	chrX.49030035	495.75	.	26115.6	35.2308	34.1479	64
chr4	2514250	2514344	chr4.2514250	493.68	.	26006.6	31.6234	30.5792	44
chr2	9584583	9584634	chr2.9584583	491.045	.	25867.8	17.481	16.6508	10
chr9	33166890	33167179	chr9.33166890	490.971	.	25863.9	95.3857	91.6075	224
chr6	85449954	85450009	chr6b.449954	490.103	.	25818.1	18.8009	17.937	23
chr8	47961593	47961641	chr8.47961593	488.897	.	25754.6	27.5075	26.491	25
chr18	59576721	59576870	chr18.59576721	488.02	.	25708.4	56.5775	53.8669	16
chr5	138467378	138467463	chr5b.54467378	487.319	.	25671.5	28.6696	27.6415	41
chr5	154815285	154815318	chr5b.70815285	486.746	.	25641.3	18.5575	17.7032	6
chr3	39410829	39410900	chr3.39410829	486.368	.	25621.4	24.0695	23.0987	50
chr18	70169352	70169512	chr18.70169352	485.734	.	25588	60.688	57.8575	0
chr15	39582241	39582282	chr15.39582241	484.176	.	25505.9	23.3271	22.3748	4
chr18	74836238	74836399	chr18.74836238	483.677	.	25479.6	61.0616	58.2198	0
chrX	49174744	49174794	chrX.49174744	483.137	.	25451.2	17.1508	16.3326	0
chr7	143305045	143305098	chr7.143305045	482.856	.	25436.4	18.1411	17.293	3
chr18	50275023	50275077	chr18.50275023	481.962	.	25389.3	18.4711	17.6191	14
chr7	76302720	76302771	chr7.76302720	481.786	.	25380	17.481	16.6508	4
chr15	75208381	75208546	chr15.75208381	481.27	.	25352.8	62.556	59.676	86
chr13	113821976	113822041	chr13.113821976	480.842	.	25330.3	22.0955	21.1652	35
chr5	172951434	172951478	chr5b.88951434	480.685	.	25322	25.1181	24.1339	43
chr9	93529475	93529524	chr9.93529475	479.305	.	25249.3	28.1051	27.0817	34
chr1	27547716	27548072	chr1.27547716	479.111	.	25239.1	117.255	112.912	151
chr16	2976843	2976986	chr16.2976843	478.769	.	25221.1	47.6763	45.4214	108
chr8	100721470	100721506	chr8.100721470	477.572	.	25158	20.3449	19.4479	0
chr13	29523304	29523431	chr13.29523304	476.588	.	25106.2	42.4387	40.9499	0
chr13	110492093	110492125	chr13.110492093	474.567	.	24999.7	17.962	17.1233	9
chr1	119916097	119916220	chr1.119916097	474.45	.	24993.6	41.1287	39.7862	29
chr9	128166195	128166277	chr9.128166195	473.338	.	24935	27.6845	26.6643	1
chr5	14262872	14263035	chr5.14262872	472.738	.	24903.4	61.8088	58.946	45
chr9	35682048	35682082	chr9.35682048	472.638	.	24898.1	19.1531	18.2835	10
chr2	26778289	26778362	chr2.26778289	471.1	.	24817.1	24.7271	23.7462	32
chr16	28835299	28835403	chr16.28835299	468.578	.	24684.2	34.9029	33.8235	53
chr1	156468120	156468329	chr1b.31468120	468.477	.	24678.9	69.2571	66.1779	124
chr15	43800669	43800704	chr15.43800669	467.708	.	24638.4	19.7489	18.8671	20
chrX	47571506	47571563	chrX.47571506	467.421	.	24623.3	19.4603	18.5815	40
chr20	38551105	38551147	chr20.38551105	467.286	.	24616.2	23.924	22.9607	17
chr7	101133745	101133800	chr7.101133745	465.827	.	24539.3	18.8009	17.937	10
chr7	2662547	2662821	chr7.2662547	464.413	.	24464.8	90.4882	86.7656	22
chrX	154435166	154435208	chrX.154435166	464.004	.	24443.3	23.924	22.9607	11
chr8	143917891	143917954	chr8.143917891	463.995	.	24442.8	21.437	20.5182	39
chr11	119094892	119094966	chr11.119094892	463.862	.	24435.8	25.0559	24.0731	29
chr11	66244331	66244483	chr11.66244331	462.875	.	24383.8	50.6212	48.258	2
chr10	80169185	80169227	chr10.80169185	459.011	.	24180.2	23.924	22.9607	38
chr2	84906013	84906170	chr2.84906013	458.879	.	24173.3	22.1469	21.2086	98
chr15	74802435	74802616	chr15.74802435	457.774	.	24115.1	60.1054	57.2966	93
chr8	144435068	144435164	chr8.144435068	457.266	.	24088.3	32.2795	31.2294	0
chr3	112638712	112638754	chr3b.21638712	456.65	.	24055.9	23.924	22.9607	12
chr13	110183207	110183246	chr13.110183207	456.251	.	24034.8	22.1338	21.2017	7
chr4	1984045	1984144	chr4.1984045	455.348	.	23987.3	33.2637	32.2075	35
chr4	7054706	7054819	chr4.7054706	454.963	.	23967	37.856	36.6929	0
chr8	143927283	143927344	chr8.143927283	454.732	.	23954.8	20.7784	19.8711	21
chr8	41308801	41308844	chr8.41308801	453.706	.	23900.8	24.521	23.5468	35
chrX	154353098	154353150	chrX.154353098	452.98	.	23862.5	17.8111	16.9752	20
chr8	133238621	133238679	chr8.133238621	452.852	.	23855.8	19.7899	18.8991	20
chr14	21393737	21393854	chr14.21393737	452.648	.	23845	39.1633	37.9511	49
chr16	89561658	89561699	chr16.89561658	452.595	.	23842.2	23.3271	22.3748	0
chrX	10117277	10117393	chrX.10117277	451.799	.	23800.3	38.8357	37.6259	16
chr8	127922554	127922731	chr8.127922554	451.703	.	23795.3	67.0386	64.0286	47
chr20	34280931	34280979	chr20.34280931	451.681	.	23794.1	27.5075	26.491	44
chr1	154602417	154602463	chr1b.29602417	451.444	.	23781.6	26.3126	25.3116	2
chr6	41599425	41599611	chr6.41599425	451.194	.	23768.5	61.74	58.8842	98
chr13	75853184	75853274	chr13.75853184	451.088	.	23762.9	30.3109	29.2738	17
chr5	178153734	178153777	chr5b.94153734	450.7	.	23742.4	24.521	23.5468	14
chr10	102657166	102657245	chr10.102657166	449.776	.	23693.8	26.6991	25.6916	75
chr9	131197856	131197930	chr9.131197856	448.97	.	23651.3	25.0559	24.0731	16
chr18	14964028	14964220	chr18.14964028	448.347	.	23618.5	63.7021	60.7875	11
chr5	65926624	65926742	chr5.65926624	448.042	.	23602.4	39.4909	38.2759	76
chr1	26731211	26731337	chr1.26731211	447.573	.	23577.7	42.1112	40.6958	48
chr7	101160601	101160751	chr7.101160601	447.074	.	23551.4	49.9668	47.6294	22
chr1	19339317	19339406	chr1.19339317	445.489	.	23467.9	29.9827	28.9477	46
chr8	144359212	144359368	chr8.144359212	445.44	.	23465.4	51.9297	49.5038	0
chr8	143929755	143929817	chr8.143929755	445.042	.	23444.4	21.1078	20.191	61
chr14	22982162	22982261	chr14.22982162	444.626	.	23422.5	33.2635	32.2075	94
chr11	65424303	65424528	chr11.65424303	443.964	.	23387.6	74.4848	71.2093	9
chr13	113863075	113863129	chr13.113863075	442.669	.	23319.4	18.471	17.6191	22
chr13	113857639	113857682	chr13.113857639	441.942	.	23281.1	24.521	23.5468	0
chr13	79481430	79481470	chr13.79481430	440.254	.	23192.2	22.7304	21.7899	9
chr7	137879238	137879494	chr7.137879238	439.391	.	23146.7	84.6104	81.0213	214
chr4	82373777	82373837	chr4.82373777	439.159	.	23134.5	20.449	19.5439	0
chr1	201484640	201484682	chr1b.76484640	437.191	.	23030.8	23.924	22.9607	13
chrX	53588420	53588463	chrX.53588420	437.029	.	23022.3	24.521	23.5468	2
chr3	47412975	47413197	chr3.47412975	436.995	.	23020.4	73.5047	70.2592	144
chr8	144400020	144400064	chr8.144400020	436.712	.	23005.5	25.1181	24.1339	17
chr15	59080975	59081024	chr15.59080975	434.912	.	22910.7	28.1051	27.0817	12
chr8	144436292	144436394	chr8.144436292	434.702	.	22899.6	34.2473	33.1738	52
chr12	52170220	52170303	chr12.52170220	434.041	.	22864.8	28.0129	26.9907	29
chr10	128098704	128098754	chr10.128098704	431.194	.	22714.9	17.1508	16.3326	6
chr21	43757154	43757232	chr21.43757154	428.406	.	22568	26.3705	25.3647	3
chr12	48938757	48938919	chr12.48938757	427.052	.	22496.7	53.8924	51.3618	34
chr13	110307899	110307920	chr13.110307899	426.898	.	22488.6	11.43	10.8788	0
chrX	154441168	154441210	chrX.154441168	426.823	.	22484.6	23.924	22.9607	13
chr6	158767005	158767072	chr6b.73767005	426.244	.	22454.1	22.7537	21.8055	37
chr18	3278011	3278061	chr18.3278011	423.958	.	22333.7	17.1508	16.3326	14
chr5	126777442	126777477	chr5b.42777442	423.5	.	22309.6	19.7489	18.8671	5
chr11	1753342	1753466	chr11.1753342	422.886	.	22277.2	41.4566	40.1073	53
chr6	27893770	27893842	chr6.27893770	421.827	.	22221.4	24.3983	23.4253	48
chr2	206160615	206160655	chr2b.112160615	420.94	.	22174.7	22.7304	21.7899	18
chr20	35279039	35279151	chr20.35279039	420.797	.	22167.2	37.5251	36.3709	14
chr10	79353989	79354105	chr10.79353989	420.284	.	22140.2	38.8357	37.6259	27
chr7	137879852	137880047	chr7.137879852	419.537	.	22100.8	64.6818	61.7374	49
chr13	79368840	79368874	chr13.79368840	419.262	.	22086.3	11.8519	11.2629	7
chrX	153958156	153958192	chrX.153958156	418.653	.	22054.2	20.3449	19.4479	5
chr18	12985379	12985442	chr18.12985379	418.583	.	22050.5	21.4422	20.5217	33
chr1	228098645	228098691	chr1b.103098645	417.745	.	22006.4	26.3126	25.3116	11
chr9	133362461	133362505	chr9.133362461	417.652	.	22001.5	25.1181	24.1339	13
chr13	43879976	43880088	chr13.43879976	417.325	.	21984.3	42.7411	41.1289	0
chr17	50186688	50186779	chr17.50186688	417.303	.	21983.1	30.639	29.6008	15
chrX	154362113	154362144	chrX.154362113	416.517	.	21941.7	17.3668	16.5432	14
chr3	129315487	129315536	chr3b.38315487	415.99	.	21913.9	16.8207	16.0058	14
chr9	127692011	127692177	chr9.127692011	415.584	.	21892.5	55.2006	52.5658	12
chr1	228494111	228494210	chr1b.103494111	415.347	.	21880.1	33.2636	32.2075	30
chr10	17234758	17234790	chr10.17234758	415.195	.	21872	17.962	17.1233	0
chr20	4699759	4699798	chr20.4699759	414.777	.	21850.1	22.1338	21.2017	12
chr13	110307484	110307527	chr13.110307484	414.41	.	21830.7	24.521	23.5468	23
chr6	113857741	113857794	chr6b.28857741	414.081	.	21813.4	18.1411	17.293	15
chr2	231708678	231708728	chr2b.137708678	413.465	.	21780.9	17.1508	16.3326	33
chr6	89081096	89081167	chr6b.4081096	412.736	.	21742.5	24.0695	23.0987	3
chr10	100362736	100362801	chr10.100362736	412.656	.	21738.3	22.0955	21.1652	38
chr5	80651218	80651239	chr5.80651218	411.958	.	21701.6	11.43	10.8788	4
chr2	46297648	46297696	chr2.46297648	411.837	.	21695.2	27.5075	26.491	11
chr13	45339552	45339590	chr13.45339552	410.78	.	21639.5	13.1802	12.5058	15
chr16	30724406	30724582	chr16.30724406	410.608	.	21630.4	58.4707	55.7099	72
chr3	45224838	45224974	chr3.45224838	410.041	.	21600.6	45.3852	43.212	118
chr6	108663659	108663696	chr6b.23663659	408.813	.	21535.8	20.941	20.032	26
chr8	23368246	23368315	chr8.23368246	408.653	.	21527.4	23.4117	22.4523	1
chr17	50186812	50186912	chr17.50186812	408.628	.	21526.1	33.5914	32.5299	85
chr12	110720144	110720201	chr12.110720144	408.327	.	21510.2	19.4603	18.5815	41
chr12	118246279	118246331	chr12.118246279	407.975	.	21491.7	17.8111	16.9752	28
chr8	23006940	23007105	chr8.23006940	407.043	.	21442.6	54.8736	52.2513	49
chrX	154535248	154535279	chrX.154535248	406.621	.	21420.4	17.3668	16.5432	26
chr13	112884879	112884920	chr13.112884879	406.456	.	21411.7	23.3271	22.3748	5
chr10	79314276	79314403	chr10.79314276	406.425	.	21410.1	42.4386	40.9499	94
chr6	139372377	139372422	chr6b.54372377	405.941	.	21384.6	25.7153	24.7214	23
chr5	176290554	176290753	chr5b.92290554	405.083	.	21339.4	65.9892	63.0178	117
chr12	6537371	6537394	chr12.6537371	404.792	.	21324	12.6146	11.97	13
chr3	128650689	128650719	chr3b.37650689	404.587	.	21313.2	16.7718	15.9641	21
chr14	50944204	50944288	chr14.50944204	404.573	.	21312.5	28.3413	27.3145	28
chr6	89081251	89081321	chr6b.4081251	404.558	.	21311.7	23.7406	22.7791	32
chr1	150509693	150509789	chr1b.25509693	404.01	.	21282.8	32.2796	31.2294	48
chr8	144086092	144086141	chr8.144086092	402.239	.	21189.5	28.1051	27.0817	23
chr2	233275907	233275982	chr2b.139275907	401.873	.	21170.3	25.3846	24.3935	47
chr6	160072820	160072862	chr6b.75072820	401.684	.	21160.3	23.924	22.9607	20
chr7	128651503	128651680	chr7.128651503	400.365	.	21090.8	58.7976	56.0254	149
chr16	28835100	28835208	chr16.28835100	400.298	.	21087.3	36.2142	35.0931	87
chr18	58919932	58920016	chr18.58919932	399.459	.	21043.1	28.3414	27.3145	38
chr12	56160661	56160686	chr12.56160661	399.238	.	21031.5	13.8008	13.1037	9
chr15	41480858	41480902	chr15.41480858	399.224	.	21030.7	25.1181	24.1339	23
chr13	114324951	114325041	chr13.114324951	398.844	.	21010.7	30.3109	29.2738	25
chrX	53604641	53604674	chrX.53604641	398.026	.	20967.6	18.5575	17.7032	10
chr4	10088312	10088352	chr4.10088312	397.865	.	20959.1	22.7304	21.7899	2
chr11	57699899	57700046	chr11.57699899	396.002	.	20861	48.9852	46.6933	13
chr13	48976780	48976856	chr13.48976780	395.8	.	20850.4	25.7132	24.7206	24
chr4	1025820	1025861	chr4.1025820	395.73	.	20846.7	23.3271	22.3748	19
chr5	14487895	14487974	chr5.14487895	395.41	.	20829.8	26.699	25.6916	4
chr6	36968463	36968514	chr6.36968463	395.145	.	20815.8	17.481	16.6508	27
chr14	22877730	22877776	chr14.22877730	395.139	.	20815.5	26.3126	25.3116	17
chr1	173477416	173477486	chr1b.48477416	395.058	.	20811.3	23.7406	22.7791	18
chr1	149886341	149886433	chr1b.24886341	394.714	.	20793.1	30.9672	29.9265	50
chr8	144397741	144397868	chr8.144397741	392.769	.	20690.7	42.4386	40.9499	49
chr3	45225927	45226087	chr3.45225927	391.685	.	20633.6	53.2382	50.7262	111
chr21	44327017	44327052	chr21.44327017	391.659	.	20632.2	19.7489	18.8671	31
chr8	144264264	144264426	chr8.144264264	391.514	.	20624.6	53.8924	51.3618	136
chr18	31625368	31625516	chr18.31625368	391.157	.	20605.8	56.2038	53.5032	12
chr1	153990795	153990836	chr1b.28990795	391.032	.	20599.2	23.3271	22.3748	15
chr12	49128454	49128499	chr12.49128454	390.652	.	20579.2	25.7153	24.7214	11
chr12	6866021	6866081	chr12.6866021	390.455	.	20568.8	20.449	19.5439	16
chrX	154359557	154359582	chrX.154359557	389.453	.	20516	13.8008	13.1037	1
chr1	9730257	9730472	chr1.9730257	389.115	.	20498.2	71.2176	68.0416	34
chr5	149247834	149247881	chr5b.65247834	388.945	.	20489.2	26.91	25.9017	9
chr15	60347524	60347584	chr15.60347524	388.849	.	20484.2	20.449	19.5439	0
chr2	43224878	43224982	chr2.43224878	388.828	.	20483.1	34.903	33.8235	12
chr7	101137983	101138031	chr7.101137983	387.061	.	20390	27.5075	26.491	8
chr5	150554115	150554167	chr5b.66554115	386.068	.	20337.7	17.8111	16.9752	34
chr7	143381608	143381751	chr7.143381608	385.645	.	20315.4	47.6763	45.4214	30
chr8	144084459	144084504	chr8.144084459	385.581	.	20312	25.7153	24.7214	23
chr5	137498420	137498585	chr5b.53498420	385.53	.	20309.3	54.8736	52.2513	122
chr5	177337403	177337438	chr5b.93337403	384.996	.	20281.2	19.7489	18.8671	5
chr5	10353740	10353786	chr5.10353740	384.768	.	20269.2	26.3126	25.3116	20
chr9	122858915	122858957	chr9.122858915	384.298	.	20244.5	23.924	22.9607	0
chr8	144107419	144107521	chr8.144107419	383.96	.	20226.6	34.2472	33.1738	51
chr5	141528846	141528927	chr5b.57528846	383.868	.	20221.8	27.356	26.3413	43
chr17	78174517	78174798	chr17.78174517	383.608	.	20208.1	92.7738	89.0149	35
chr20	63933312	63933441	chr20.63933312	383.538	.	20204.4	43.0935	41.3842	63
chr5	77076269	77076408	chr5.77076269	382.967	.	20174.3	46.3671	44.1693	10
chr13	113263687	113263723	chr13.113263687	382.603	.	20155.2	20.3449	19.4479	8
chr1	203796353	203796501	chr1b.78796353	381.804	.	20113	49.3124	47.0074	29
chr21	44871088	44871259	chr21.44871088	381.634	.	20104.1	64.7975	61.8472	10
chr4	20252796	20252841	chr4.20252796	381.086	.	20075.2	25.7153	24.7214	12
chr6	26251692	26251852	chr6.26251692	379.8	.	20007.5	53.2382	50.7262	148
chr5	10679684	10679720	chr5.10679684	379.478	.	19990.5	20.3449	19.4479	0
chr2	26135717	26135762	chr2.26135717	377.645	.	19893.9	25.7153	24.7214	28
chr5	177351562	177351608	chr5b.93351562	377.561	.	19889.5	26.3126	25.3116	13
chr5	173328070	173328113	chr5b.89328070	376.779	.	19848.3	24.521	23.5468	3
chr6	113859899	113859937	chr6b.28859899	376.484	.	19832.8	21.5374	20.6168	20
chr21	44323862	44323906	chr21.44323862	375.444	.	19778	25.1181	24.1339	1
chr18	62187543	62187671	chr18.62187543	375.261	.	19768.4	42.7674	41.1289	0
chrX	154443008	154443038	chrX.154443008	374.998	.	19754.5	16.7718	15.9641	22
chr11	75404082	75404188	chr11.75404082	374.673	.	19737.4	35.5586	34.4656	5
chr8	144527515	144527642	chr8.144527515	374.109	.	19707.7	42.4386	40.9499	58
chr16	25178099	25178157	chr16.25178099	374.092	.	19706.8	19.7899	18.8991	28
chr14	104719379	104719433	chr14.104719379	373.882	.	19695.7	18.471	17.6191	15
chr5	132876202	132876425	chr5b.48876202	373.239	.	19661.8	73.8314	70.5742	42
chr2	24821034	24821140	chr2.24821034	372.058	.	19599.6	35.5586	34.4656	47
chr7	100089331	100089374	chr7.100089331	372.019	.	19597.6	14.8368	14.0903	18
chr11	69653999	69654137	chr11.69653999	370.898	.	19538.6	46.0398	43.8563	85
chr3	100748213	100748276	chr3b.9748213	370.88	.	19537.6	21.437	20.5182	7
chrX	153952770	153952948	chrX.153952770	370.436	.	19514.2	59.1246	56.3405	140
chr14	22981986	22982031	chr14.22981986	369.771	.	19479.2	25.7153	24.7214	22
chr5	72196721	72196749	chr5.72196721	369.743	.	19477.7	15.5826	14.8108	12
chr4	6302356	6302510	chr4.6302356	369.294	.	19454.1	51.2755	48.8976	118
chr5	10681020	10681061	chr5.10681020	368.447	.	19409.4	23.3271	22.3748	0
chr7	100430598	100430739	chr7.100430598	368.104	.	19391.3	47.0217	44.7921	65
chr2	64636401	64636525	chr2.64636401	367.337	.	19350.9	41.4562	40.1073	51
chr9	115090785	115090821	chr9.115090785	367.281	.	19348	20.3449	19.4479	18
chr19	583240	583283	chr19.583240	367.029	.	19334.7	24.521	23.5468	10
chr13	24905762	24905871	chr13.24905762	367.01	.	19333.7	37.155	36.0196	0
chr13	23355207	23355247	chr13.23355207	366.885	.	19327.2	22.7304	21.7899	0
chrX	12976262	12976327	chrX.12976262	366.534	.	19308.7	22.0955	21.1652	33
chr18	5238466	5238513	chr18.5238466	365.973	.	19279.1	26.91	25.9017	32
chr13	113835901	113835989	chr13.113835901	365.358	.	19246.7	29.6546	28.621	25
chr1	8013557	8013600	chr1.8013557	364.978	.	19226.7	24.521	23.5468	21
chr9	137255559	137255606	chr9.137255559	364.796	.	19217.1	26.91	25.9017	26
chr3	49531756	49531799	chr3.49531756	363.301	.	19138.4	24.521	23.5468	20
chr13	109784650	109784688	chr13.109784650	363.132	.	19129.4	21.5374	20.6168	1
chr3	129120486	129120724	chr3b.38120486	362.261	.	19083.5	87.7551	84.1259	9
chrX	73844945	73845082	chrX.73844945	361.267	.	19031.2	45.7125	43.5344	85
chr11	62881136	62881173	chr11.62881136	360.513	.	18991.5	20.941	20.032	15
chr8	70608167	70608214	chr8.70608167	360.441	.	18987.7	26.91	25.9017	18
chr9	131485040	131485070	chr9.131485040	360.408	.	18985.9	16.7718	15.9641	22
chr13	114325061	114325131	chr13.114325061	360.303	.	18980.4	23.7408	22.7791	41
chr8	23842653	23842759	chr8.23842653	359.807	.	18954.3	35.5586	34.4656	38
chrX	154361393	154361433	chrX.154361393	359.756	.	18951.6	22.7304	21.7899	35
chr9	128822494	128822706	chr9.128822494	359.272	.	18926.1	70.2374	67.0991	66
chr5	10258199	10258221	chr5.10258199	359.05	.	18914.4	12.022	11.4053	6
chr19	48966674	48966736	chr19.48966674	359.006	.	18912.1	21.1077	20.191	34
chr16	28836756	28836838	chr16.28836756	358.598	.	18890.6	27.6845	26.6643	26
chr2	231455523	231455594	chr2b.137455523	358.164	.	18867.7	24.0695	23.0987	39
chr8	144314393	144314433	chr8.144314393	357.16	.	18814.9	22.7304	21.7899	36
chr10	100913049	100913095	chr10.100913049	357.157	.	18814.7	26.3126	25.3116	16
chr13	113837815	113837964	chr13.113837815	355.438	.	18724.1	49.6892	47.3561	13
chrX	40654436	40654470	chrX.40654436	355.23	.	18713.1	19.1531	18.2835	9
chr4	521696	521905	chr4.521696	355.163	.	18709.6	69.2571	66.1779	0
chr10	86521438	86521573	chr10.86521438	355.025	.	18702.4	51.3442	48.9552	93
chr5	41918387	41918457	chr5.41918387	354.995	.	18700.8	23.7406	22.7791	60
chr5	467153	467223	chr5.467153	354.058	.	18651.4	23.7406	22.7791	35
chr9	120856153	120856262	chr9.120856153	353.871	.	18641.6	36.542	35.4166	48
chr14	77027054	77027218	chr14.77027054	353.423	.	18618	54.5465	51.9392	0
chr8	27605006	27605087	chr8.27605006	352.989	.	18595.1	27.3562	26.3413	52
chr11	319733	319758	chr11.319733	352.809	.	18585.6	13.8008	13.1037	3
chr2	85320354	85320508	chr2.85320354	352.684	.	18579	51.2755	48.8976	35
chr9	111904113	111904267	chr9.111904113	351.995	.	18542.8	58.446	55.6928	16
chr11	60922270	60922454	chr11.60922270	351.939	.	18539.8	61.0862	58.2421	15
chr1	151581707	151581753	chr1b.26581707	351.653	.	18524.7	26.3126	25.3116	15
chrX	49071797	49071830	chrX.49071797	351.442	.	18513.6	18.5575	17.7032	23
chr2	25744003	25744112	chr2.25744003	351.287	.	18505.4	36.5419	35.4166	36
chr19	3053307	3053489	chr19.3053307	351.134	.	18497.4	60.4323	57.6128	129
chr13	113978880	113978919	chr13.113978880	351.126	.	18497	22.1338	21.2017	0
chr5	98793467	98793636	chr5b.14793467	351.12	.	18496.6	56.1817	53.4909	32
chr8	39103764	39103928	chr8.39103764	350.702	.	18474.6	62.1825	59.3099	3
chrX	73846865	73847055	chrX.73846865	350.691	.	18474	63.0476	60.1523	157
chr3	47870908	47871009	chr3.47870908	350.678	.	18473.4	33.9193	32.852	96
chr13	33286699	33286791	chr13.33286699	350.526	.	18465.4	35.2523	34.1626	0
chr7	5312607	5312776	chr7.5312607	349.048	.	18387.5	56.1817	53.4909	99
chr4	70688729	70688768	chr4.70688729	348.924	.	18381	22.1338	21.2017	11
chr15	75340021	75340145	chr15.75340021	348.135	.	18339.4	41.4562	40.1073	0
chr17	50201524	50201570	chr17.50201524	348.008	.	18332.7	26.3126	25.3116	36
chr6	160063454	160063557	chr6b.75063454	347.864	.	18325.1	34.5753	33.4983	22
chr19	3976430	3976515	chr19.3976430	347.76	.	18319.6	28.6697	27.6415	5
chr5	179617838	179617882	chr5b.95617838	347.743	.	18318.7	25.1181	24.1339	16
chr4	1978693	1978745	chr4.1978693	347.713	.	18317.2	17.8111	16.9752	31
chr12	56615295	56615471	chr12.56615295	347.445	.	18303	58.4706	55.7099	28
chr10	97717791	97717837	chr10.97717791	347.067	.	18283.1	15.8292	15.0435	25
chr2	130345862	130345925	chr2b.36345862	347.063	.	18282.9	21.4371	20.5182	44
chr5	132934363	132934435	chr5b.48934363	346.579	.	18257.4	24.3984	23.4253	38
chr11	72015877	72016056	chr11.72015877	346.342	.	18244.9	59.4515	56.6634	112
chr8	143921200	143921253	chr8.143921200	345.586	.	18205.1	18.1411	17.293	11
chr6	27865597	27865763	chr6.27865597	345.284	.	18189.2	55.2006	52.5658	0
chr18	8825650	8825733	chr18.8825650	345.151	.	18182.2	28.0129	26.9907	0
chr8	144311572	144311613	chr8.144311572	345.086	.	18178.8	14.1746	13.4536	20
chr7	44115850	44115898	chr7.44115850	344.521	.	18149	27.5075	26.491	31
chrX	154531811	154531856	chrX.154531811	344.511	.	18148.5	25.7153	24.7214	29
chr6	144095074	144095141	chr6b.59095074	344.141	.	18129	22.7538	21.8055	24
chr1	43605334	43605400	chr1.43605334	343.945	.	18118.7	22.4246	21.4863	45
chr7	76304155	76304213	chr7.76304155	343.841	.	18113.2	19.7899	18.8991	31
chr11	102205922	102205965	chr11.102205922	343.717	.	18106.7	24.521	23.5468	29
chr9	137242539	137242582	chr9.137242539	343.239	.	18081.5	24.521	23.5468	13
chr5	31526309	31526405	chr5.31526309	343.199	.	18079.4	32.2795	31.2294	36
chr22	37805541	37805580	chr22.37805541	342.894	.	18063.3	22.1338	21.2017	16
chr2	189006383	189006432	chr2b.95006383	342.756	.	18056	28.1051	27.0817	17
chr5	65926238	65926291	chr5.65926238	342.384	.	18036.4	18.1412	17.293	15
chr13	45278387	45278477	chr13.45278387	341.955	.	18013.8	34.5027	33.4266	0
chr12	106238904	106238961	chr12.106238904	341.669	.	17998.8	19.4603	18.5815	28
chr3	53255868	53255904	chr3.53255868	341.29	.	17978.8	20.3449	19.4479	10
chr15	75690488	75690731	chr15.75690488	340.863	.	17956.3	80.3647	76.8776	91
chr5	180790808	180790845	chr5b.96790808	340.707	.	17948.1	20.941	20.032	13
chr13	21176978	21177021	chr13.21176978	340.705	.	17948	24.521	23.5468	0
chr11	35231043	35231083	chr11.35231043	340.592	.	17942.1	22.7304	21.7899	27
chr13	113860195	113860337	chr13.113860195	340.439	.	17934	47.3491	45.111	0
chr1	8361286	8361410	chr1.8361286	340.345	.	17929	41.4562	40.1073	71
chrX	119574684	119574734	chrX.119574684	339.977	.	17909.6	17.1508	16.3326	2
chr3	196049976	196050097	chr3b.105049976	339.689	.	17894.5	40.4736	39.2079	0
chr10	119818178	119818320	chr10.119818178	339.115	.	17864.2	53.9611	51.4203	0
chr9	131497224	131497268	chr9.131497224	338.925	.	17854.2	25.1181	24.1339	1
chr9	128633536	128633599	chr9.128633536	338.821	.	17848.8	21.437	20.5182	47
chrX	9894499	9894641	chrX.9894499	338.427	.	17828	53.9611	51.4203	0
chr2	151410034	151410152	chr2b.57410034	338.348	.	17823.8	39.4909	38.2759	48
chr14	24149420	24149521	chr14.24149420	338.342	.	17823.5	33.9194	32.852	0
chr13	112881859	112881925	chr13.112881859	338.284	.	17820.4	22.4246	21.4863	0
chr8	144397550	144397675	chr8.144397550	338.243	.	17818.3	41.7837	40.409	32
chr18	9536689	9536736	chr18.9536689	338.094	.	17810.5	16.1599	15.3694	40
chr11	61967531	61967568	chr11.61967531	337.978	.	17804.4	12.8484	12.1825	13
chr2	99550731	99550871	chr2b.5550731	337.031	.	17754.5	47.5887	45.3461	15
chr10	102644569	102644642	chr10.102644569	336.952	.	17750.3	24.7271	23.7462	33
chr3	49359430	49359472	chr3.49359430	336.845	.	17744.7	23.924	22.9607	19
chr9	124353542	124353612	chr9.124353542	336.84	.	17744.4	23.7406	22.7791	9
chr6	44255160	44255205	chr6.44255160	336.688	.	17736.4	25.7153	24.7214	35
chr1	27307076	27307497	chr1.27307076	336.462	.	17724.5	138.463	133.342	31
chrX	71300007	71300052	chrX.71300007	336.421	.	17722.3	25.7153	24.7214	0
chr2	74504019	74504159	chr2.74504019	336.172	.	17709.2	53.2135	50.7057	72
chr6	151349782	151349871	chr6b.66349782	336.026	.	17701.5	29.9829	28.9477	2
chr2	235042629	235042703	chr2b.141042629	335.938	.	17696.9	25.0559	24.0731	16
chrX	153952086	153952160	chrX.153952086	335.81	.	17690.2	25.0559	24.0731	7
chr8	144360991	144361036	chr8.144360991	335.736	.	17686.3	25.7153	24.7214	14
chr18	59650197	59650308	chr18.59650197	335.636	.	17681	37.5443	36.3871	0
chr14	68882928	68882991	chr14.68882928	335.626	.	17680.5	21.437	20.5182	11
chr5	14471368	14471409	chr5.14471368	335.322	.	17664.4	23.3271	22.3748	0
chr8	144360224	144360253	chr8.144360224	335.134	.	17654.5	16.1771	15.3849	5
chrX	130013953	130014105	chrX.130013953	335.101	.	17652.8	50.6212	48.258	81
chrX	47211078	47211110	chrX.47211078	334.582	.	17625.5	17.962	17.1233	10
chr6	35835282	35835325	chr6.35835282	334.534	.	17622.9	24.521	23.5468	0
chr11	35139233	35139266	chr11.35139233	334.431	.	17617.5	18.5575	17.7032	18
chr4	2514122	2514200	chr4.2514122	334.333	.	17612.3	26.3705	25.3647	21
chr1	113905548	113905702	chr1.113905548	334.109	.	17600.5	51.2755	48.8976	58
chr3	23918463	23918511	chr3.23918463	333.965	.	17593	27.5075	26.491	31
chr1	158094889	158094980	chr1b.33094889	333.955	.	17592.4	30.6391	29.6008	63
chr13	113264194	113264226	chr13.113264194	333.411	.	17563.8	17.962	17.1233	0
chr16	29799678	29799724	chr16.29799678	332.971	.	17540.6	26.3126	25.3116	6
chr18	13763315	13763373	chr18.13763315	332.699	.	17526.3	19.7899	18.8991	19
chr5	176347604	176347725	chr5b.92347604	332.562	.	17519	40.4736	39.2079	0
chr2	86144486	86144528	chr2.86144486	332.455	.	17513.4	23.924	22.9607	13
chr1	35192550	35192627	chr1.35192550	332.116	.	17495.5	26.0419	25.0428	7
chr13	75853353	75853427	chr13.75853353	331.929	.	17485.7	25.0559	24.0731	42
chr2	237366773	237366901	chr2b.143366773	331.396	.	17457.6	42.7661	41.1289	21
chr11	74012988	74013109	chr11.74012988	331.142	.	17444.2	40.4736	39.2079	48
chr2	37645939	37646007	chr2.37645939	331.075	.	17440.7	23.0827	22.1325	40
chr7	27154433	27154527	chr7.27154433	330.775	.	17424.9	31.6234	30.5792	4
chr11	61866095	61866344	chr11.61866095	330.705	.	17421.2	82.3243	78.7835	83
chr2	234496360	234496476	chr2b.140496360	330.533	.	17412.2	39.078	37.866	59
chr9	33111633	33111677	chr9.33111633	330.082	.	17388.4	25.1181	24.1339	16
chr7	72948847	72949099	chr7.72948847	329.9	.	17378.8	83.5063	79.9298	78
chr1	43617854	43617892	chr1.43617854	329.61	.	17363.5	21.5374	20.6168	10
chr17	38919525	38919559	chr17.38919525	329.463	.	17355.8	19.1531	18.2835	24
chr8	144139361	144139480	chr8.144139361	329.222	.	17343.1	39.8185	38.5928	40
chr2	219224642	219224681	chr2b.125224642	329.094	.	17336.4	22.1338	21.2017	30
chr5	76732463	76732501	chr5.76732463	328.893	.	17325.8	13.1802	12.5058	0
chr18	51030505	51030531	chr18.51030505	328.697	.	17315.4	14.3944	13.6658	17
chr2	215434798	215434841	chr2b.121434798	328.128	.	17285.5	14.8368	14.0903	22
chr16	2766076	2766156	chr16.2766076	327.771	.	17266.7	27.0275	26.0143	39
chr5	154799720	154799765	chr5b.70799720	327.411	.	17247.7	25.7153	24.7214	16
chr8	28347101	28347169	chr8.28347101	327.072	.	17229.8	23.0828	22.1325	13
chr21	33555088	33555172	chr21.33555088	326.839	.	17217.5	28.3412	27.3145	23
chr1	156250033	156250163	chr1b.31250033	326.632	.	17206.7	43.4209	41.403	68
chr1	154963388	154963525	chr1b.29963388	326.044	.	17175.7	45.7125	43.5344	0
chr4	2248271	2248352	chr4.2248271	325.791	.	17162.4	27.3561	26.3413	26
chr1	156134864	156134914	chr1b.31134864	325.688	.	17156.9	17.1508	16.3326	2
chr14	102933430	102933458	chr14.102933430	325.556	.	17149.9	15.5826	14.8108	16
chr13	113862653	113862689	chr13.113862653	325.362	.	17139.7	20.3449	19.4479	0
chr2	1648528	1648559	chr2.1648528	325.344	.	17138.8	17.3668	16.5432	9
chr2	206004367	206004548	chr2b.112004367	325.268	.	17134.8	60.1054	57.2966	118
chr2	20202632	20202826	chr2.20202632	324.914	.	17116.2	64.355	61.4219	119
chr2	28413642	28413732	chr2.28413642	324.5	.	17094.3	30.3109	29.2738	74
chr12	122143254	122143398	chr12.122143254	324.375	.	17087.7	48.0036	45.7373	119
chr1	116404461	116404502	chr1.116404461	324.206	.	17078.9	23.3271	22.3748	17
chr13	109782986	109783043	chr13.109782986	324.117	.	17074.1	19.4608	18.5815	0
chr11	65921380	65921424	chr11.65921380	324.099	.	17073.2	25.1181	24.1339	3
chr9	127516897	127517015	chr9.127516897	323.67	.	17050.6	39.4909	38.2759	31
chr13	25340002	25340035	chr13.25340002	323.121	.	17021.7	13.0557	12.3867	5
chr1	154963021	154963072	chr1b.29963021	323.087	.	17019.9	17.481	16.6508	1
chr6	154733808	154733873	chr6b.69733808	323.038	.	17017.3	22.0957	21.1652	31
chr14	22877238	22877362	chr14.22877238	322.726	.	17000.9	41.4562	40.1073	0
chr3	51936321	51936468	chr3.51936321	322.513	.	16989.7	55.8301	53.1612	17
chr4	39457641	39457679	chr4.39457641	322.465	.	16987.1	21.5374	20.6168	19
chr8	143919413	143919468	chr8.143919413	321.951	.	16960.1	18.8009	17.937	23
chr9	135500711	135500756	chr9.135500711	321.554	.	16939.1	25.7153	24.7214	16
chr7	2729927	2730015	chr7.2729927	321.486	.	16935.5	29.6544	28.621	50
chr18	59663511	59663642	chr18.59663511	321.357	.	16928.8	43.7485	41.6502	0
chr12	110019188	110019239	chr12.110019188	321.246	.	16922.9	17.481	16.6508	14
chr19	46788217	46788546	chr19.46788217	320.985	.	16909.1	106.805	102.763	270
chr17	81511974	81512020	chr17.81511974	320.786	.	16898.7	26.3126	25.3116	0
chrX	150768747	150768872	chrX.150768747	320.281	.	16872.1	41.7837	40.409	36
chr5	32126152	32126237	chr5.32126152	319.892	.	16851.6	28.6696	27.6415	21
chrX	47636866	47636984	chrX.47636866	319.679	.	16840.4	39.491	38.2759	23
chr7	2646897	2646943	chr7.2646897	319.637	.	16838.2	26.3126	25.3116	2
chr4	6641783	6641808	chr4.6641783	319.557	.	16834	13.8008	13.1037	0
chr18	36798475	36798503	chr18.36798475	319.475	.	16829.6	15.5826	14.8108	1
chr6	27838960	27839060	chr6.27838960	319.429	.	16827.2	33.5914	32.5299	69
chr17	81510738	81510804	chr17.81510738	319.344	.	16822.7	22.4246	21.4863	65
chr8	144516670	144516758	chr8.144516670	319.061	.	16807.8	29.6544	28.621	47
chr9	127510214	127510275	chr9.127510214	318.105	.	16757.4	20.7784	19.8711	37
chr1	54871495	54871556	chr1.54871495	317.88	.	16745.6	20.7784	19.8711	39
chr20	63933555	63933675	chr20.63933555	317.316	.	16715.9	40.1461	38.8944	59
chr18	70325129	70325252	chr18.70325129	317.002	.	16699.3	41.1287	39.7862	0
chr10	79306218	79306262	chr10.79306218	316.863	.	16692	25.1181	24.1339	0
chr13	111283198	111283218	chr13.111283198	316.562	.	16676.2	10.8384	10.3671	0
chr7	2664170	2664210	chr7.2664170	316.549	.	16675.5	22.7304	21.7899	14
chr4	73142267	73142365	chr4.73142267	316.539	.	16675	32.9355	31.8817	6
chr8	144456540	144456728	chr8.144456540	316.509	.	16673.4	62.4154	59.5379	23
chr13	29511123	29511184	chr13.29511123	316.314	.	16663.1	20.7785	19.8711	31
chr7	139571220	139571262	chr7.139571220	315.983	.	16645.6	23.924	22.9607	0
chrX	153954260	153954284	chrX.153954260	315.972	.	16645.1	13.2075	12.5305	0
chr5	41918677	41918716	chr5.41918677	315.424	.	16616.2	13.5118	12.8175	20
chr12	57525420	57525644	chr12.57525420	314.901	.	16588.6	74.1581	70.8949	46
chr2	120988774	120988929	chr2b.26988774	314.785	.	16582.5	58.8198	56.0397	11
chr13	111303762	111303822	chr13.111303762	314.569	.	16571.2	23.244	22.2924	0
chr1	214551421	214551461	chr1b.89551421	314.393	.	16561.9	22.7304	21.7899	9
chr7	100154717	100154826	chr7.100154717	314.357	.	16560	41.6182	40.2681	41
chr10	93333809	93333859	chr10.93333809	314.317	.	16557.9	17.1508	16.3326	17
chr10	72013143	72013196	chr10.72013143	314.113	.	16547.2	18.1411	17.293	23
chr8	26655908	26655952	chr8.26655908	314.055	.	16544.1	25.1181	24.1339	30
chr1	153535326	153535353	chr1b.28535326	314.031	.	16542.9	14.9883	14.2361	21
chr16	3022826	3022947	chr16.3022826	313.786	.	16529.9	40.4736	39.2079	69
chr1	156136951	156137037	chr1b.31136951	313.202	.	16499.2	28.9979	27.9682	26
chr7	75422290	75422374	chr7.75422290	313.186	.	16498.3	28.3412	27.3145	47
chr7	44766252	44766299	chr7.44766252	312.728	.	16474.2	26.91	25.9017	23
chrX	47199508	47199558	chrX.47199508	312.062	.	16439.1	17.1508	16.3326	26
chr1	54850109	54850157	chr1.54850109	311.687	.	16419.4	27.5075	26.491	31
chr15	57706781	57706828	chr15.57706781	311.579	.	16413.7	26.91	25.9017	15
chr20	33676258	33676396	chr20.33676258	310.942	.	16380.1	46.0399	43.8563	88
chr21	38823029	38823069	chr21.38823029	310.873	.	16376.5	22.7304	21.7899	0
chr11	65430196	65430253	chr11.65430196	310.715	.	16368.2	19.4603	18.5815	10
chr14	99515010	99515104	chr14.99515010	310.376	.	16350.3	31.6234	30.5792	27
chr18	39742452	39742563	chr18.39742452	310.117	.	16336.7	37.1992	36.0619	0
chr13	44575166	44575222	chr13.44575166	309.732	.	16316.4	19.1306	18.2634	0
chr11	65597897	65598024	chr11.65597897	309.662	.	16312.7	42.4386	40.9499	52
chr15	40466511	40466716	chr15.40466511	309.383	.	16298	67.95	64.9229	40
chr8	142735493	142735539	chr8.142735493	309.37	.	16297.3	26.3126	25.3116	21
chr21	34517878	34518039	chr21.34517878	309.204	.	16288.6	53.5653	51.0468	42
chr18	45954640	45954697	chr18.45954640	309.016	.	16278.7	19.9669	19.0731	7
chr4	41014016	41014190	chr4.41014016	308.991	.	16277.3	57.8167	55.0727	37
chr11	73368603	73368835	chr11.73368603	308.991	.	16277.3	76.7716	73.3914	94
chr8	143935029	143935150	chr8.143935029	308.608	.	16257.1	33.6457	32.5806	51
chr18	23529444	23529533	chr18.23529444	307.801	.	16214.6	34.1281	33.0565	10
chr4	2251117	2251149	chr4.2251117	307.773	.	16213.2	17.962	17.1233	8
chrX	130081441	130081490	chrX.130081441	307.514	.	16199.5	28.1051	27.0817	16
chr13	75823783	75823831	chr13.75823783	307.227	.	16184.4	16.4903	15.6845	17
chr21	45515755	45515860	chr21.45515755	307.182	.	16182.1	35.231	34.1479	36
chr2	54657967	54658010	chr2.54657967	307.043	.	16174.7	24.521	23.5468	26
chr2	191390363	191390412	chr2b.97390363	306.757	.	16159.6	28.1051	27.0817	39
chr8	38057133	38057181	chr8.38057133	306.677	.	16155.4	27.5075	26.491	26
chr2	112659208	112659342	chr2b.18659208	306.311	.	16136.2	44.7305	42.5931	13
chr13	20974677	20974720	chr13.20974677	305.702	.	16104.1	16.8397	16.0235	0
chr21	44806227	44806260	chr21.44806227	305.476	.	16092.2	18.5575	17.7032	11
chr1	36177997	36178044	chr1.36177997	305.178	.	16076.5	26.91	25.9017	18
chr6	34246626	34246672	chr6.34246626	305.048	.	16069.6	26.3126	25.3116	7
chr1	63634894	63634947	chr1.63634894	304.417	.	16036.4	18.1411	17.293	1
chr10	8058609	8058687	chr10.8058609	303.688	.	15998	26.3705	25.3647	37
chr3	49531625	49531658	chr3.49531625	303.579	.	15992.2	18.5575	17.7032	0
chr6	111483331	111483367	chr6b.26483331	303.481	.	15987.1	14.1928	13.4685	10
chr10	101003764	101003806	chr10.101003764	303.357	.	15980.5	23.924	22.9607	17
chr5	14422115	14422195	chr5.14422115	303.261	.	15975.5	27.0276	26.0143	20
chr4	17810380	17810562	chr4.17810380	303.157	.	15970	60.4332	57.6128	0
chr11	74034164	74034221	chr11.74034164	302.989	.	15961.2	19.4603	18.5815	26
chr12	50099983	50100175	chr12.50099983	302.915	.	15957.3	63.7013	60.7875	26
chr1	94174175	94174230	chr1.94174175	302.433	.	15931.9	18.8009	17.937	37
chr1	158096670	158096752	chr1b.33096670	302.2	.	15919.6	27.6845	26.6643	48
chr9	98087199	98087248	chr9.98087199	302.159	.	15917.4	28.1051	27.0817	16
chr6	82365347	82365466	chr6.82365347	301.19	.	15866.4	39.8185	38.5928	45
chr13	113321712	113321731	chr13.113321712	300.646	.	15837.7	10.2473	9.84491	15
chr22	42619754	42619830	chr22.42619754	300.597	.	15835.2	25.7132	24.7206	62
chr14	68792896	68792992	chr14.68792896	300.18	.	15813.2	32.2795	31.2294	36
chr4	2829527	2829584	chr4.2829527	300.147	.	15811.5	20.5146	19.6079	19
chr18	45934844	45934879	chr18.45934844	299.98	.	15802.7	19.7489	18.8671	6
chr6	26240698	26240746	chr6.26240698	299.683	.	15787	27.5075	26.491	17
chr6	163479960	163480101	chr6b.78479960	299.544	.	15779.7	53.5873	51.0611	5
chr3	127677702	127677804	chr3b.36677702	299.341	.	15769	34.2472	33.1738	52
chr5	73447387	73447416	chr5.73447387	299.333	.	15768.6	16.1771	15.3849	0
chr2	240569062	240569106	chr2b.146569062	299.233	.	15763.3	25.1181	24.1339	39
chr22	30340735	30340777	chr22.30340735	298.965	.	15749.2	23.924	22.9607	12
chr13	20988928	20988963	chr13.20988928	298.824	.	15741.8	19.7489	18.8671	0
chr5	98794241	98794289	chr5b.14794241	298.69	.	15734.7	27.5075	26.491	41
chr12	109450559	109450712	chr12.109450559	298.224	.	15710.1	50.9483	48.5813	26
chrX	141908870	141908928	chrX.141908870	298.22	.	15709.9	19.7899	18.8991	15
chr11	65920632	65920670	chr11.65920632	297.762	.	15685.8	21.5374	20.6168	26
chr4	48831197	48831236	chr4.48831197	297.76	.	15685.7	22.1338	21.2017	38
chr5	150521605	150521647	chr5b.66521605	297.548	.	15674.5	23.924	22.9607	35
chr16	1998403	1998488	chr16.1998403	297.392	.	15666.3	28.6696	27.6415	49
chr6	34288389	34288533	chr6.34288389	297.306	.	15661.8	48.0036	45.7373	63
chr7	74122112	74122160	chr7.74122112	297.171	.	15654.7	27.5075	26.491	9
chr7	100678767	100678813	chr7.100678767	297.167	.	15654.5	26.3126	25.3116	13
chr17	38920471	38920537	chr17.38920471	297.149	.	15653.5	22.4247	21.4863	26
chr7	100868531	100868578	chr7.100868531	296.816	.	15636	26.91	25.9017	26
chr14	104770373	104770404	chr14.104770373	296.32	.	15609.8	17.3668	16.5432	25
chr2	54645322	54645467	chr2.54645322	296.126	.	15599.6	48.3308	46.0596	100
chr8	143437844	143437927	chr8.143437844	296.07	.	15596.7	28.0129	26.9907	25
chr13	113834625	113834662	chr13.113834625	296.048	.	15595.5	12.8484	12.1825	5
chrX	135032856	135032883	chrX.135032856	296.03	.	15594.6	14.9883	14.2361	9
chr4	55396055	55396084	chr4.55396055	296.009	.	15593.5	16.1771	15.3849	0
chrX	73842997	73843044	chrX.73842997	295.991	.	15592.5	26.91	25.9017	43
chr18	74518568	74518608	chr18.74518568	295.882	.	15586.8	15.7063	14.9228	19
chr9	129006509	129006643	chr9.129006509	295.7	.	15577.2	44.7305	42.5931	17
chr1	24654911	24654941	chr1.24654911	295.628	.	15573.4	16.7718	15.9641	2
chr8	143933206	143933288	chr8.143933206	295.224	.	15552.1	27.6845	26.6643	42
chr5	176290179	176290224	chr5b.92290179	295.208	.	15551.2	25.7153	24.7214	23
chr18	58396317	58396378	chr18.58396317	295.044	.	15542.6	20.7784	19.8711	39
chr9	136833383	136833545	chr9.136833383	294.853	.	15532.5	61.4353	58.5865	30
chr19	41230994	41231079	chr19.41230994	294.847	.	15532.3	28.6696	27.6415	37
chr14	49586050	49586098	chr14.49586050	294.044	.	15490	27.5075	26.491	0
chr20	45420401	45420443	chr20.45420401	293.358	.	15453.8	23.924	22.9607	20
chrX	53433776	53433818	chrX.53433776	293.043	.	15437.2	23.924	22.9607	31
chr10	70146332	70146435	chr10.70146332	292.785	.	15423.6	34.5751	33.4983	0
chr4	75644003	75644160	chr4.75644003	292.504	.	15408.8	52.2569	49.8239	0
chr6	7883091	7883127	chr6.7883091	292.491	.	15408.2	12.5164	11.8752	13
chr16	55505643	55505692	chr16.55505643	292.456	.	15406.3	28.1051	27.0817	7
chr6	159779946	159780001	chr6b.74779946	292.394	.	15403	18.8009	17.937	18
chr6	27807760	27807836	chr6.27807760	292.247	.	15395.3	25.7132	24.7206	33
chr13	21177079	21177152	chr13.21177079	291.922	.	15378.1	24.7272	23.7462	10
chr17	44076091	44076215	chr17.44076091	291.574	.	15359.8	41.4562	40.1073	47
chr21	34834432	34834536	chr21.34834432	291.529	.	15357.5	34.9029	33.8235	49
chr8	23297944	23297965	chr8.23297944	290.675	.	15312.4	11.43	10.8788	0
chr13	113184865	113184915	chr13.113184865	290.652	.	15311.3	19.48	18.5994	0
chr1	42926665	42926719	chr1.42926665	290.373	.	15296.6	18.471	17.6191	18
chrX	24996137	24996311	chrX.24996137	290.193	.	15287.1	57.8167	55.0727	113
chr10	73813197	73813246	chr10.73813197	289.808	.	15266.8	19.1032	18.2369	23
chr15	66502688	66502716	chr15.66502688	289.797	.	15266.2	15.5826	14.8108	9
chr6	116278687	116278724	chr6b.31278687	289.7	.	15261.1	20.941	20.032	6
chr12	6766567	6766661	chr12.6766567	289.211	.	15235.3	31.6234	30.5792	73
chr2	46380299	46380354	chr2.46380299	289.009	.	15224.7	18.8009	17.937	54
chr1	43620891	43620934	chr1.43620891	288.722	.	15209.6	24.521	23.5468	3
chr18	9513062	9513091	chr18.9513062	288.641	.	15205.3	16.1771	15.3849	6
chr14	99510652	99510791	chr14.99510652	288.615	.	15204	46.3671	44.1693	60
chrX	154022778	154022912	chrX.154022778	288.575	.	15201.8	47.2009	44.968	1
chr12	6384284	6384366	chr12.6384284	288.115	.	15177.6	27.6845	26.6643	16
chr9	134031165	134031208	chr9.134031165	287.722	.	15156.9	24.521	23.5468	5
chr5	32229101	32229151	chr5.32229101	287.719	.	15156.7	17.1509	16.3326	0
chr4	39977642	39977689	chr4.39977642	287.622	.	15151.6	18.3491	17.4984	0
chr7	44767909	44767979	chr7.44767909	287.178	.	15128.3	23.7406	22.7791	26
chr5	112842355	112842404	chr5b.28842355	287.174	.	15128.1	16.821	16.0058	23
chr14	102507207	102507416	chr14.102507207	287.174	.	15128	69.2571	66.1779	33
chr11	65501408	65501440	chr11.65501408	287.17	.	15127.8	17.962	17.1233	11
chr2	238161710	238161757	chr2b.144161710	286.832	.	15110	26.91	25.9017	5
chr5	39376703	39376741	chr5.39376703	286.804	.	15108.6	21.5374	20.6168	0
chr4	10097776	10097823	chr4.10097776	286.783	.	15107.5	26.91	25.9017	5
chr13	113952031	113952070	chr13.113952031	286.702	.	15103.2	15.3281	14.561	0
chr7	100820195	100820230	chr7.100820195	286.462	.	15090.5	19.7489	18.8671	3
chr6	44254771	44254997	chr6.44254771	286.387	.	15086.6	74.8115	71.5298	55
chr5	149551013	149551068	chr5b.65551013	286.308	.	15082.4	18.8009	17.937	1
chr12	6528028	6528066	chr12.6528028	285.943	.	15063.2	21.5374	20.6168	28
chr14	51715371	51715418	chr14.51715371	285.747	.	15052.9	26.91	25.9017	14
chr3	184171046	184171079	chr3b.93171046	285.362	.	15032.6	18.5575	17.7032	15
chr2	28751873	28751910	chr2.28751873	285.174	.	15022.7	14.5714	13.8287	0
chr3	50288412	50288541	chr3.50288412	285.135	.	15020.6	43.0935	41.3842	83
chrX	49075599	49075655	chrX.49075599	285.135	.	15020.6	19.1306	18.2634	8
chr2	74205765	74205809	chr2.74205765	285.097	.	15018.6	25.1181	24.1339	16
chr13	113854276	113854315	chr13.113854276	284.805	.	15003.3	22.1338	21.2017	21
chr5	179775796	179775841	chr5b.95775796	284.608	.	14992.8	25.7153	24.7214	8
chr5	140567502	140567568	chr5b.56567502	284.249	.	14974	22.4246	21.4863	0
chr6	158489635	158489678	chr6b.73489635	284.145	.	14968.5	24.521	23.5468	0
chr12	56272176	56272304	chr12.56272176	284.092	.	14965.7	42.7661	41.1289	36
chr3	52524645	52524687	chr3.52524645	283.986	.	14960.1	23.924	22.9607	23
chr7	151081790	151081906	chr7.151081790	283.922	.	14956.8	38.8358	37.6259	3
chr5	73447704	73447768	chr5.73447704	283.432	.	14930.9	21.7663	20.8376	54
chr12	49040352	49040440	chr12.49040352	283.406	.	14929.6	29.6545	28.621	40
chr18	46086184	46086201	chr18.46086184	283.189	.	14918.1	9.067	8.77524	16
chr6	132328454	132328500	chr6b.47328454	283.126	.	14914.8	26.3126	25.3116	23
chr6	36923589	36923628	chr6.36923589	282.928	.	14904.3	22.1338	21.2017	7
chr3	58156002	58156041	chr3.58156002	282.773	.	14896.2	22.1338	21.2017	12
chr22	35424267	35424339	chr22.35424267	282.72	.	14893.4	24.3983	23.4253	30
chr10	87743493	87743530	chr10.87743493	282.551	.	14884.5	20.941	20.032	0
chr14	99502879	99502904	chr14.99502879	282.253	.	14868.8	13.8008	13.1037	14
chr11	62533352	62533405	chr11.62533352	282.104	.	14861	18.1412	17.293	17
chr10	100987387	100987422	chr10.100987387	282.078	.	14859.6	19.7489	18.8671	0
chr14	74903023	74903084	chr14.74903023	281.953	.	14853	20.7784	19.8711	22
chr8	28351598	28351643	chr8.28351598	281.712	.	14840.3	25.7153	24.7214	24
chr18	23535565	23535601	chr18.23535565	281.45	.	14826.5	20.3449	19.4479	20
chr3	48589853	48589970	chr3.48589853	281.384	.	14823	39.1633	37.9511	30
chr3	129272357	129272381	chr3b.38272357	281.127	.	14809.5	13.2075	12.5305	12
chr2	43225612	43225738	chr2.43225612	281.112	.	14808.7	42.1111	40.6958	0
chr8	102863884	102863977	chr8.102863884	281.061	.	14806	31.2953	30.2533	7
chr10	80520578	80520622	chr10.80520578	280.823	.	14793.5	25.1181	24.1339	0
chr6	42268325	42268485	chr6.42268325	280.545	.	14778.8	53.2382	50.7262	77
chr13	113832171	113832233	chr13.113832171	280.468	.	14774.8	21.1079	20.191	8
chr5	10679469	10679503	chr5.10679469	280.441	.	14773.3	19.1531	18.2835	0
chr5	173317909	173317965	chr5b.89317909	280.326	.	14767.3	19.1306	18.2634	20
chrX	54815323	54815423	chrX.54815323	280.261	.	14763.9	33.5914	32.5299	94
chr9	128908404	128908581	chr9.128908404	279.688	.	14733.7	58.7976	56.0254	46
chr14	24302292	24302333	chr14.24302292	279.232	.	14709.6	23.3271	22.3748	7
chr15	75412802	75412845	chr15.75412802	279.11	.	14703.2	24.521	23.5468	19
chr9	128163499	128163570	chr9.128163499	279.002	.	14697.6	24.0695	23.0987	16
chr7	47302969	47303159	chr7.47302969	278.781	.	14685.9	63.0476	60.1523	0
chr15	68291265	68291389	chr15.68291265	278.48	.	14670.1	44.6748	42.5379	31
chrX	154011622	154011711	chrX.154011622	277.8	.	14634.3	29.9827	28.9477	75
chrX	73843962	73844221	chrX.73843962	277.585	.	14622.9	85.5901	81.9881	98
chr6	43179166	43179223	chr6.43179166	277.557	.	14621.4	19.4605	18.5815	1
chr2	36513605	36513660	chr2.36513605	277.526	.	14619.8	18.8009	17.937	35
chr15	72375880	72375919	chr15.72375880	276.894	.	14586.5	22.1338	21.2017	7
chr18	2567517	2567557	chr18.2567517	276.71	.	14576.8	22.7304	21.7899	0
chr10	24607791	24607816	chr10.24607791	276.69	.	14575.8	13.8008	13.1037	0
chr16	27461195	27461345	chr16.27461195	276.306	.	14555.5	49.9668	47.6294	123
chr12	56159658	56159693	chr12.56159658	276.12	.	14545.7	19.7489	18.8671	12
chr15	74035529	74035574	chr15.74035529	276.116	.	14545.5	25.7153	24.7214	6
chr1	32771001	32771050	chr1.32771001	275.958	.	14537.2	28.1051	27.0817	23
chr3	141447126	141447154	chr3b.50447126	275.718	.	14524.6	15.5826	14.8108	0
chr1	156738610	156738683	chr1b.31738610	275.213	.	14497.9	24.7271	23.7462	40
chr15	48537673	48537717	chr15.48537673	274.803	.	14476.3	25.1181	24.1339	16
chr1	8861287	8861330	chr1.8861287	274.736	.	14472.8	24.521	23.5468	18
chrX	51895292	51895317	chrX.51895292	274.559	.	14463.5	13.8008	13.1037	8
chr10	79385656	79385751	chr10.79385656	274.46	.	14458.3	31.9516	30.9042	0
chr16	2176770	2176812	chr16.2176770	274.366	.	14453.3	23.924	22.9607	18
chr7	100107978	100108081	chr7.100107978	274.202	.	14444.7	34.5751	33.4983	53
chr10	101005460	101005607	chr10.101005460	274.094	.	14439	49.3187	47.0083	0
chr8	130054049	130054138	chr8.130054049	273.847	.	14426	29.9827	28.9477	21
chr12	120212021	120212145	chr12.120212021	273.726	.	14419.6	41.4562	40.1073	68
chr1	150159050	150159123	chr1b.25159050	273.309	.	14397.7	24.7271	23.7462	48
chr11	64767601	64767722	chr11.64767601	273.196	.	14391.7	40.4736	39.2079	1
chr7	100882062	100882149	chr7.100882062	272.873	.	14374.7	29.3262	28.2952	36
chr13	113857942	113857992	chr13.113857942	272.774	.	14369.4	17.1509	16.3326	17
chr11	65871175	65871266	chr11.65871175	272.761	.	14368.8	30.639	29.6008	39
chr3	184177037	184177064	chr3b.93177037	272.59	.	14359.8	14.9883	14.2361	24
chr5	141573851	141573924	chr5b.57573851	272.586	.	14359.5	24.7272	23.7462	31
chr15	72200541	72200574	chr15.72200541	272.534	.	14356.8	18.5575	17.7032	28
chr18	21111583	21111611	chr18.21111583	272.453	.	14352.6	15.5826	14.8108	0
chr5	140529429	140529471	chr5b.56529429	272.398	.	14349.6	23.924	22.9607	13
chr8	47961153	47961195	chr8.47961153	272.299	.	14344.4	23.924	22.9607	21
chr11	33710049	33710100	chr11.33710049	271.839	.	14320.2	17.481	16.6508	30
chr18	39518108	39518148	chr18.39518108	271.809	.	14318.6	22.7304	21.7899	22
chr2	215414868	215414904	chr2b.121414868	271.415	.	14297.9	20.3449	19.4479	1
chr15	84798009	84798051	chr15.84798009	271.321	.	14292.9	23.924	22.9607	13
chr5	154814464	154814571	chr5b.70814464	270.917	.	14271.7	35.8865	34.7772	0
chr9	130233213	130233290	chr9.130233213	270.746	.	14262.6	26.0419	25.0428	34
chr10	102479428	102479476	chr10.102479428	270.634	.	14256.7	27.5075	26.491	0
chr5	154419328	154419398	chr5b.70419328	270.6	.	14254.9	23.7406	22.7791	28
chr12	52286408	52286453	chr12.52286408	270.562	.	14252.9	25.7153	24.7214	12
chrX	154436008	154436046	chrX.154436008	270.407	.	14244.8	21.5374	20.6168	0
chrX	154483836	154483882	chrX.154483836	270.086	.	14227.9	26.3126	25.3116	12
chr5	14335350	14335456	chr5.14335350	269.621	.	14203.4	35.5586	34.4656	26
chr2	69247719	69247777	chr2.69247719	269.499	.	14197	19.7899	18.8991	33
chr13	109784192	109784228	chr13.109784192	269.493	.	14196.6	12.5168	11.8752	0
chr4	1011727	1011802	chr4.1011727	269.446	.	14194.2	28.8781	27.8487	26
chr18	32092788	32092814	chr18.32092788	269.297	.	14186.3	14.3944	13.6658	0
chr13	40771041	40771072	chr13.40771041	269.232	.	14182.9	17.3668	16.5432	3
chr3	33114316	33114405	chr3.33114316	269.111	.	14176.5	29.9827	28.9477	33
chr12	6936569	6936629	chr12.6936569	268.97	.	14169.1	20.449	19.5439	33
chr5	141938659	141938747	chr5b.57938659	268.625	.	14150.9	29.6546	28.621	37
chr10	75398852	75398901	chr10.75398852	268.549	.	14146.9	28.1051	27.0817	34
chr21	36413128	36413196	chr21.36413128	268.335	.	14135.6	23.0827	22.1325	26
chr13	79366106	79366127	chr13.79366106	268.316	.	14134.6	11.43	10.8788	8
chr10	102160648	102160730	chr10.102160648	267.916	.	14113.5	27.6845	26.6643	23
chr12	56160296	56160342	chr12.56160296	267.853	.	14110.2	26.3126	25.3116	21
chr8	144313974	144314045	chr8.144313974	267.716	.	14103	24.0695	23.0987	24
chrX	154016442	154016482	chrX.154016442	267.681	.	14101.2	22.7304	21.7899	39
chr8	143991727	143991794	chr8.143991727	267.453	.	14089.2	22.7537	21.8055	35
chr15	88899384	88899427	chr15.88899384	267.336	.	14083	24.521	23.5468	29
chr1	1338038	1338085	chr1.1338038	267.175	.	14074.5	26.91	25.9017	32
chr5	14316602	14316662	chr5.14316602	267.093	.	14070.2	20.449	19.5439	33
chr3	49705616	49705657	chr3.49705616	267.003	.	14065.5	23.3271	22.3748	0
chr2	113240174	113240318	chr2b.19240174	266.967	.	14063.6	48.0035	45.7373	0
chr2	215404487	215404591	chr2b.121404487	266.946	.	14062.4	34.9029	33.8235	66
chr16	28823193	28823269	chr16.28823193	266.654	.	14047.1	25.7132	24.7206	24
chr18	23530080	23530114	chr18.23530080	266.587	.	14043.5	19.1531	18.2835	11
chr10	125148891	125149068	chr10.125148891	266.563	.	14042.3	58.7977	56.0254	26
chr10	95290882	95290925	chr10.95290882	266.505	.	14039.2	24.521	23.5468	0
chr1	155660033	155660155	chr1b.30660033	266.483	.	14038.1	40.8012	39.4726	104
chrX	48893771	48893831	chrX.48893771	266.48	.	14037.9	20.449	19.5439	40
chrX	150474620	150474782	chrX.150474620	266.449	.	14036.3	61.4353	58.5865	24
chr6	169701678	169701886	chr6b.84701678	265.987	.	14011.9	78.614	75.1656	0
chr18	59610948	59610989	chr18.59610948	265.825	.	14003.4	23.3271	22.3748	0
chr11	72007309	72007356	chr11.72007309	265.771	.	14000.5	26.91	25.9017	17
chr4	1877372	1877425	chr4.1877372	265.719	.	13997.8	18.1412	17.293	7
chr9	137448701	137448750	chr9.137448701	265.237	.	13972.4	28.1051	27.0817	47
chrX	153700800	153700853	chrX.153700800	265.087	.	13964.5	18.1411	17.293	5
chr12	98594054	98594119	chr12.98594054	264.896	.	13954.4	22.0955	21.1652	36
chrX	39787020	39787048	chrX.39787020	264.777	.	13948.2	15.5826	14.8108	0
chr2	96283629	96283678	chr2b.2283629	263.87	.	13900.4	28.1051	27.0817	46
chr6	107068265	107068404	chr6b.22068265	263.672	.	13890	46.3673	44.1693	0
chr5	31495537	31495628	chr5.31495537	263.524	.	13882.2	34.8775	33.7986	46
chr17	7930400	7930586	chr17.7930400	263.416	.	13876.5	61.74	58.8842	11
chr5	9545788	9545877	chr5.9545788	263.257	.	13868.1	29.9827	28.9477	27
chr11	63976309	63976407	chr11.63976309	262.992	.	13854.2	32.9355	31.8817	17
chr2	231807814	231807858	chr2b.137807814	262.885	.	13848.5	25.1181	24.1339	0
chr7	128854626	128854670	chr7.128854626	262.684	.	13837.9	25.1181	24.1339	0
chr10	72275250	72275290	chr10.72275250	262.617	.	13834.4	22.7304	21.7899	8
chr7	143382381	143382428	chr7.143382381	262.365	.	13821.1	26.91	25.9017	0
chr7	55206681	55206715	chr7.55206681	262.121	.	13808.3	19.1531	18.2835	5
chr6	52500957	52500984	chr6.52500957	262.088	.	13806.5	14.9883	14.2361	8
chr8	47836428	47836445	chr8.47836428	261.952	.	13799.4	9.067	8.77524	12
chr14	68892127	68892155	chr14.68892127	261.753	.	13788.9	15.5826	14.8108	0
chr3	125595233	125595299	chr3b.34595233	261.628	.	13782.3	23.3128	22.3605	16
chr11	72238799	72239020	chr11.72238799	261.584	.	13780	73.178	69.955	190
chr10	119042010	119042201	chr10.119042010	261.576	.	13779.5	63.3744	60.4713	15
chr7	98281895	98281945	chr7.98281895	261.493	.	13775.2	17.1508	16.3326	37
chr13	39013565	39013623	chr13.39013565	261.356	.	13768	19.7899	18.8991	17
chr1	150268782	150268826	chr1b.25268782	261.214	.	13760.5	25.1181	24.1339	0
chr3	184171411	184171443	chr3b.93171411	261.194	.	13759.5	12.6763	12.0185	0
chr10	17229951	17229965	chr10.17229951	261.16	.	13757.6	7.30229	7.14526	1
chrX	48560636	48560691	chrX.48560636	260.99	.	13748.7	18.8009	17.937	27
chr14	104770807	104770834	chr14.104770807	260.908	.	13744.4	14.9883	14.2361	9
chr8	37698508	37698606	chr8.37698508	260.808	.	13739.1	32.9355	31.8817	77
chrX	154470012	154470136	chrX.154470012	260.8	.	13738.7	41.4713	40.1213	0
chr3	47588055	47588140	chr3.47588055	260.714	.	13734.2	28.6696	27.6415	7
chr1	156044060	156044179	chr1b.31044060	260.487	.	13722.2	39.8186	38.5928	13
chr20	45898468	45898505	chr20.45898468	260.34	.	13714.4	12.8484	12.1825	5
chr3	49534820	49534892	chr3.49534820	260.291	.	13711.9	24.3984	23.4253	29
chr15	96331936	96331970	chr15.96331936	260.226	.	13708.5	19.1531	18.2835	11
chr9	134727371	134727399	chr9.134727371	260.207	.	13707.4	15.5826	14.8108	19
chr9	131484739	131484786	chr9.131484739	260.104	.	13702	26.91	25.9017	13
chr3	4979716	4979758	chr3.4979716	259.649	.	13678	23.924	22.9607	25
chr17	42404615	42404661	chr17.42404615	259.544	.	13672.5	15.8292	15.0435	31
chr20	5119612	5119648	chr20.5119612	259.344	.	13662	20.3449	19.4479	9
chr1	154959520	154959597	chr1b.29959520	259.243	.	13656.6	26.042	25.0428	5
chr12	120701715	120701779	chr12.120701715	259.115	.	13649.9	21.7663	20.8376	29
chr2	84870662	84870707	chr2.84870662	259.042	.	13646.1	25.7153	24.7214	10
chr13	75636524	75636546	chr13.75636524	259.012	.	13644.5	12.022	11.4053	0
chr4	6923450	6923502	chr4.6923450	258.884	.	13637.8	17.8111	16.9752	5
chr6	88612731	88612754	chr6b.3612731	258.798	.	13633.2	12.6146	11.97	0
chr11	61404559	61404607	chr11.61404559	258.715	.	13628.9	27.5075	26.491	13
chr3	150411166	150411206	chr3b.59411166	258.688	.	13627.4	22.7304	21.7899	16
chr7	2729592	2729665	chr7.2729592	258.581	.	13621.8	24.7271	23.7462	49
chr2	240466747	240466803	chr2b.146466747	258.572	.	13621.3	19.1306	18.2634	26
chr3	17160817	17160861	chr3.17160817	258.404	.	13612.5	25.1181	24.1339	14
chr1	183552814	183552936	chr1b.58552814	258.284	.	13606.2	41.3715	40.0227	60
chr1	43603706	43603783	chr1.43603706	258.132	.	13598.1	26.0419	25.0428	53
chr14	23307897	23308018	chr14.23307897	258.109	.	13596.9	40.4736	39.2079	28
chr8	25411482	25411606	chr8.25411482	258.08	.	13595.4	41.4563	40.1073	0
chr5	74627907	74627945	chr5.74627907	257.965	.	13589.3	21.5374	20.6168	1
chr12	12908449	12908576	chr12.12908449	257.961	.	13589.1	42.4386	40.9499	53
chr7	92391197	92391231	chr7.92391197	257.832	.	13582.3	19.1531	18.2835	7
chr9	136465983	136466079	chr9.136465983	257.633	.	13571.8	32.2795	31.2294	43
chr1	30876705	30876859	chr1.30876705	256.963	.	13536.6	51.2755	48.8976	54
chrX	71246053	71246086	chrX.71246053	256.87	.	13531.6	18.5575	17.7032	12
chr15	73926516	73926544	chr15.73926516	256.583	.	13516.6	15.5826	14.8108	0
chr3	51420139	51420202	chr3.51420139	256.581	.	13516.4	21.437	20.5182	28
chr5	38933036	38933080	chr5.38933036	256.475	.	13510.8	25.1181	24.1339	20
chr12	124334527	124334567	chr12.124334527	256.206	.	13496.7	22.7304	21.7899	16
chr8	144399641	144399681	chr8.144399641	256.158	.	13494.1	22.7304	21.7899	7
chr5	14487653	14487709	chr5.14487653	255.923	.	13481.8	19.1306	18.2634	13
chr5	150553766	150553877	chr5b.66553766	255.265	.	13447.1	37.1974	36.0619	100
chr1	24841130	24841156	chr1.24841130	255.218	.	13444.7	14.3944	13.6658	0
chr14	75469302	75469406	chr14.75469302	255.148	.	13441	34.9029	33.8235	42
chr5	43556622	43556671	chr5.43556622	254.917	.	13428.8	28.1051	27.0817	9
chr13	20773376	20773525	chr13.20773376	254.761	.	13420.5	56.5777	53.8669	0
chr2	73079855	73079972	chr2.73079855	254.649	.	13414.7	39.1633	37.9511	50
chr11	67398435	67398528	chr11.67398435	254.592	.	13411.7	31.2953	30.2533	83
chr3	150742537	150742581	chr3b.59742537	254.484	.	13405.9	25.1181	24.1339	15
chr5	75350825	75350874	chr5.75350825	254.478	.	13405.7	28.1051	27.0817	0
chr20	35954115	35954313	chr20.35954115	254.282	.	13395.3	65.6623	62.7001	25
chr5	178149704	178149751	chr5b.94149704	254.202	.	13391.1	26.91	25.9017	13
chr18	59656936	59656996	chr18.59656936	254.198	.	13390.9	23.2443	22.2924	25
chr14	55063101	55063153	chr14.55063101	253.988	.	13379.9	17.8111	16.9752	46
chr6	73517836	73517884	chr6.73517836	253.839	.	13372	16.4903	15.6845	0
chr21	43934993	43935159	chr21.43934993	253.704	.	13364.9	62.9297	60.0395	0
chr8	143932877	143932915	chr8.143932877	253.518	.	13355.1	21.5374	20.6168	7
chr8	102412615	102412660	chr8.102412615	253.43	.	13350.4	25.7153	24.7214	12
chr6	43132541	43132574	chr6.43132541	253.429	.	13350.4	18.5575	17.7032	5
chr5	115625907	115625996	chr5b.31625907	253.326	.	13344.9	29.9827	28.9477	35
chr3	172247652	172247681	chr3b.81247652	252.844	.	13319.6	16.1771	15.3849	13
chr8	144789861	144789944	chr8.144789861	252.747	.	13314.5	28.0129	26.9907	42
chr1	201782316	201782433	chr1b.76782316	252.67	.	13310.4	39.1633	37.9511	71
chr1	50969174	50969281	chr1.50969174	252.636	.	13308.6	35.8864	34.7772	47
chr9	110171682	110171782	chr9.110171682	252.632	.	13308.4	33.5914	32.5299	35
chr1	43619721	43619762	chr1.43619721	252.554	.	13304.3	23.3271	22.3748	15
chr3	127690747	127690796	chr3b.36690747	252.49	.	13300.9	28.1051	27.0817	25
chr15	39596003	39596045	chr15.39596003	252.458	.	13299.2	23.924	22.9607	0
chr14	22876332	22876381	chr14.22876332	252.316	.	13291.8	28.1051	27.0817	19
chrX	150513714	150513766	chrX.150513714	252.076	.	13279.1	17.8111	16.9752	23
chr3	48681515	48681717	chr3.48681515	252.026	.	13276.5	66.9697	63.9696	32
chrX	154019469	154019490	chrX.154019469	251.942	.	13272.1	11.43	10.8788	9
chr14	102726754	102726896	chr14.102726754	251.742	.	13261.5	47.349	45.111	82
chr4	7032792	7032872	chr4.7032792	251.427	.	13244.9	27.0279	26.0143	38
chr8	11838514	11838571	chr8.11838514	251.338	.	13240.2	19.4604	18.5815	5
chr17	75846162	75846398	chr17.75846162	251.288	.	13237.6	78.0782	74.6652	52
chr2	27041026	27041162	chr2.27041026	251.116	.	13228.5	45.3852	43.212	42
chr10	102360247	102360287	chr10.102360247	250.862	.	13215.2	22.7304	21.7899	12
chr6	73518987	73519015	chr6.73518987	250.838	.	13213.9	15.5826	14.8108	8
chr3	33866455	33866484	chr3.33866455	250.264	.	13183.7	16.1771	15.3849	11
chrX	135033096	135033147	chrX.135033096	250.056	.	13172.7	17.481	16.6508	49
chr4	6277547	6277597	chr4.6277547	250.008	.	13170.2	17.1508	16.3326	28
chr8	26408064	26408099	chr8.26408064	249.774	.	13157.8	19.7489	18.8671	33
chr6	143826242	143826273	chr6b.58826242	249.732	.	13155.6	10.8541	10.3754	17
chr7	101206279	101206347	chr7.101206279	249.679	.	13152.8	23.0827	22.1325	29
chr11	62572632	62572653	chr11.62572632	249.631	.	13150.3	7.50565	7.32444	8
chr18	50285158	50285200	chr18.50285158	249.465	.	13141.6	23.924	22.9607	0
chr12	55728330	55728358	chr12.55728330	249.276	.	13131.6	15.5826	14.8108	5
chr18	48758210	48758247	chr18.48758210	249.231	.	13129.2	14.5714	13.8287	0
chr18	47176223	47176251	chr18.47176223	249.19	.	13127.1	9.85323	9.48927	17
chr11	64768155	64768194	chr11.64768155	249.099	.	13122.3	22.1338	21.2017	6
chr9	137217771	137217820	chr9.137217771	249.002	.	13117.2	28.1051	27.0817	8
chr15	90265857	90265896	chr15.90265857	248.956	.	13114.7	22.1338	21.2017	0
chr13	99068101	99068244	chr13.99068101	248.854	.	13109.4	54.3353	51.767	0
chr13	31132144	31132287	chr13.31132144	248.854	.	13109.4	54.3353	51.767	0
chr18	12329579	12329647	chr18.12329579	248.397	.	13085.3	23.0827	22.1325	9
chr5	134552113	134552155	chr5b.50552113	248.385	.	13084.7	23.924	22.9607	9
chr12	120469443	120469509	chr12.120469443	248.231	.	13076.5	22.4246	21.4863	25
chr21	34888139	34888195	chr21.34888139	248.171	.	13073.4	19.1308	18.2634	14
chr10	71816446	71816478	chr10.71816446	248.164	.	13073.1	17.962	17.1233	0
chr5	173321399	173321455	chr5b.89321399	248.052	.	13067.1	19.1306	18.2634	10
chr6	85641949	85642080	chr6b.641949	248.049	.	13067	43.7486	41.6502	3
chr2	68252358	68252434	chr2.68252358	247.865	.	13057.3	25.7132	24.7206	23
chr20	43702605	43702626	chr20.43702605	247.834	.	13055.6	11.43	10.8788	0
chr11	102110810	102110859	chr11.102110810	247.616	.	13044.2	28.1051	27.0817	27
chr12	753538	753660	chr12.753538	247.359	.	13030.6	40.8012	39.4726	103
chr13	34072726	34072868	chr13.34072726	247.338	.	13029.5	53.9615	51.4203	0
chr12	131982316	131982429	chr12.131982316	247.128	.	13018.5	37.8528	36.6929	54
chr2	159712399	159712523	chr2b.65712399	247.094	.	13016.7	42.4703	40.9499	0
chr3	48469091	48469170	chr3.48469091	246.968	.	13010	26.6991	25.6916	11
chr22	39313280	39313315	chr22.39313280	246.967	.	13010	19.7489	18.8671	15
chr10	102423319	102423343	chr10.102423319	246.873	.	13005	13.2075	12.5305	7
chr4	1980945	1981004	chr4.1980945	246.463	.	12983.4	20.1195	19.2257	1
chr15	64963098	64963140	chr15.64963098	246.42	.	12981.2	16.462	15.6585	10
chr18	23524751	23524788	chr18.23524751	246.364	.	12978.2	14.5717	13.8287	0
chr14	22846177	22846226	chr14.22846177	246.136	.	12966.2	28.1051	27.0817	21
chr5	179616157	179616193	chr5b.95616157	246.068	.	12962.6	20.3449	19.4479	20
chr6	158033528	158033564	chr6b.73033528	245.548	.	12935.2	12.5164	11.8752	0
chr13	45969117	45969154	chr13.45969117	245.437	.	12929.4	20.941	20.032	0
chr15	90953767	90953883	chr15.90953767	245.363	.	12925.5	38.8357	37.6259	20
chr8	144400213	144400239	chr8.144400213	244.964	.	12904.5	14.3944	13.6658	4
chr5	14247114	14247168	chr5.14247114	244.898	.	12901	20.9867	20.0707	1
chrX	57596669	57596720	chrX.57596669	244.87	.	12899.5	19.8568	18.9641	16
chrX	119468482	119468497	chrX.119468482	244.822	.	12897	5.47065	5.41696	0
chr11	117204371	117204431	chr11.117204371	244.814	.	12896.5	20.449	19.5439	17
chr3	51663158	51663262	chr3.51663158	244.556	.	12883	34.903	33.8235	47
chr8	143920955	143921007	chr8.143920955	244.057	.	12856.7	17.8111	16.9752	27
chr21	45991003	45991050	chr21.45991003	243.991	.	12853.2	26.91	25.9017	7
chr2	46382073	46382117	chr2.46382073	243.988	.	12853.1	15.1681	14.4032	13
chr20	36784126	36784280	chr20.36784126	243.908	.	12848.8	51.2755	48.8976	10
chr19	1440376	1440457	chr19.1440376	243.826	.	12844.5	27.356	26.3413	34
chr1	204411173	204411372	chr1b.79411173	243.822	.	12844.3	65.9892	63.0178	30
chr1	44221266	44221346	chr1.44221266	243.643	.	12834.9	27.0276	26.0143	18
chr16	3023296	3023325	chr16.3023296	243.523	.	12828.6	16.1771	15.3849	5
chr12	57526064	57526164	chr12.57526064	243.227	.	12813	33.5915	32.5299	29
chr10	101002631	101002654	chr10.101002631	243.166	.	12809.7	12.6146	11.97	2
chr5	32125410	32125508	chr5.32125410	243.072	.	12804.8	32.9355	31.8817	54
chr6	26123847	26123888	chr6.26123847	242.939	.	12797.8	23.3271	22.3748	8
chr13	113209738	113209775	chr13.113209738	242.692	.	12784.8	20.941	20.032	16
chr18	8825172	8825204	chr18.8825172	242.556	.	12777.6	17.962	17.1233	0
chr18	51177045	51177065	chr18.51177045	242.279	.	12763	10.8384	10.3671	0
chr5	642000	642100	chr5.642000	242.217	.	12759.7	33.5944	32.5299	0
chr21	44311052	44311092	chr21.44311052	242.134	.	12755.4	22.7304	21.7899	29
chr10	77577972	77578265	chr10.77577972	241.972	.	12746.8	110.331	106.21	0
chr5	59039075	59039118	chr5.59039075	241.916	.	12743.9	24.521	23.5468	14
chr12	56241559	56241604	chr12.56241559	241.74	.	12734.6	25.7153	24.7214	5
chr3	50253071	50253125	chr3.50253071	241.604	.	12727.4	18.471	17.6191	22
chr3	9447758	9447804	chr3.9447758	241.449	.	12719.3	26.3126	25.3116	7
chr13	49989548	49989592	chr13.49989548	241.197	.	12706	17.2174	16.3959	0
chr2	241495455	241495529	chr2b.147495455	241.164	.	12704.3	25.0559	24.0731	17
chr4	1246046	1246123	chr4.1246046	240.885	.	12689.6	29.6285	28.5958	14
chr4	1980420	1980521	chr4.1980420	240.765	.	12683.3	33.9193	32.852	50
chr5	177457381	177457436	chr5b.93457381	240.493	.	12668.9	18.8009	17.937	29
chr1	179099854	179099896	chr1b.54099854	240.424	.	12665.3	23.924	22.9607	21
chr6	108074370	108074394	chr6b.23074370	240.312	.	12659.4	13.2075	12.5305	6
chr1	15409999	15410235	chr1.15409999	240.151	.	12650.9	78.0782	74.6652	181
chr8	22420115	22420162	chr8.22420115	239.882	.	12636.7	26.91	25.9017	31
chr8	22574704	22574730	chr8.22574704	239.699	.	12627.1	14.3944	13.6658	4
chr13	99538282	99538417	chr13.99538282	239.627	.	12623.3	51.3442	48.9552	0
chr3	51960262	51960307	chr3.51960262	239.624	.	12623.2	25.7153	24.7214	5
chr1	234607625	234607681	chr1b.109607625	239.541	.	12618.8	19.1306	18.2634	32
chr1	153607409	153607460	chr1b.28607409	239.486	.	12615.9	17.481	16.6508	27
chr5	137753871	137753913	chr5b.53753871	239.484	.	12615.8	23.924	22.9607	2
chr3	184167694	184167737	chr3b.93167694	239.18	.	12599.8	24.521	23.5468	6
chr16	2002275	2002362	chr16.2002275	239.03	.	12591.9	29.3262	28.2952	27
chr4	1986294	1986369	chr4.1986294	238.681	.	12573.5	25.3846	24.3935	0
chr16	24931226	24931312	chr16.24931226	238.672	.	12573	28.9979	27.9682	40
chr5	151101176	151101200	chr5b.67101176	238.579	.	12568.1	13.2075	12.5305	0
chr3	44443070	44443116	chr3.44443070	238.573	.	12567.8	26.3126	25.3116	13
chr2	215394610	215394661	chr2b.121394610	238.564	.	12567.3	17.4811	16.6508	7
chr20	50192348	50192383	chr20.50192348	238.562	.	12567.2	19.7489	18.8671	24
chr12	2874243	2874299	chr12.2874243	238.52	.	12565	19.1306	18.2634	20
chr12	121233602	121233724	chr12.121233602	238.421	.	12559.8	40.8012	39.4726	44
[truncated: 62,928 more rows]

## Sheet: JAMM_VA13_hTR_3
Chrom	Start	End	Name	Score	Strand	Peak score	pVal	qVal	Point-source
[truncated: 38,574 more rows]

[truncated: 1 more sheets: JAMM_HeLa_hTR]
