# Supplementary figures and images for: The RNA interactome of human telomerase RNA reveals a coding-independent role for a histone mRNA in telomere homeostasis
Source: eLife journal article supplement (doi:10.7554/elife.40037), 2018-10-25

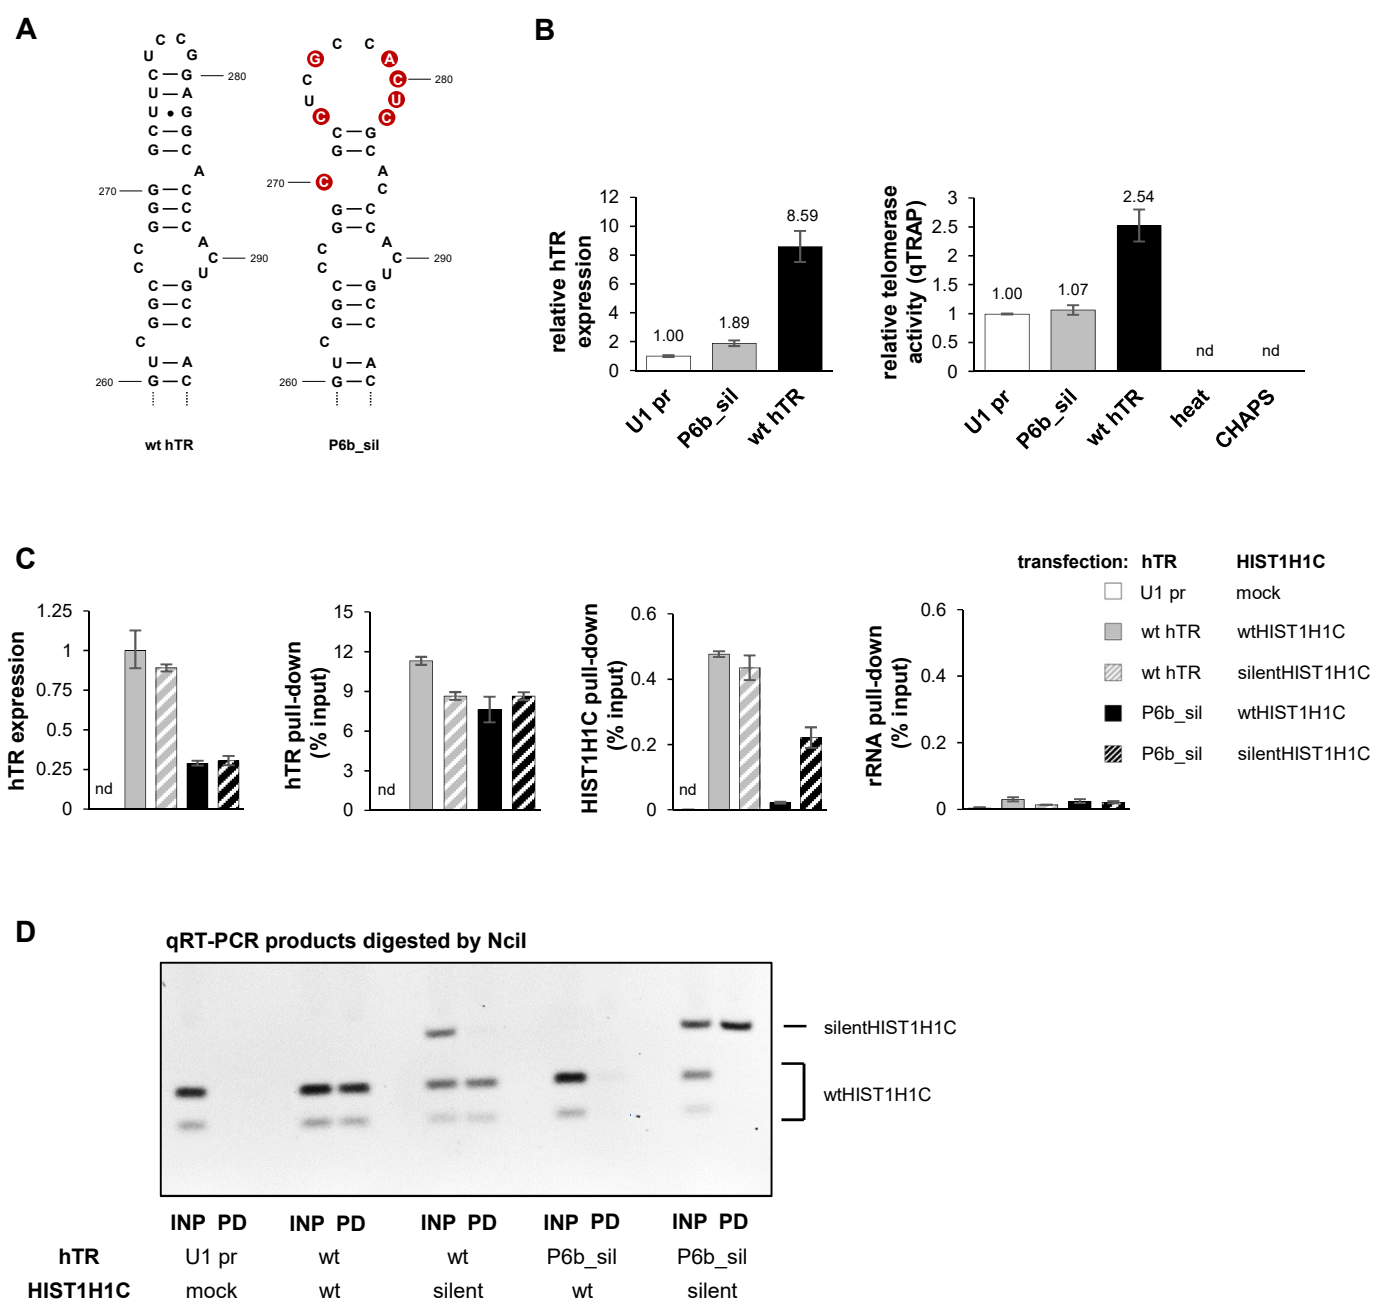

Figure 5 - figure supplement 1

Supplement: supp [file elife-40037-supp-v1.zip › elife_poa_e40037_Figure_5_figure_supplement_1.pdf]

**A**

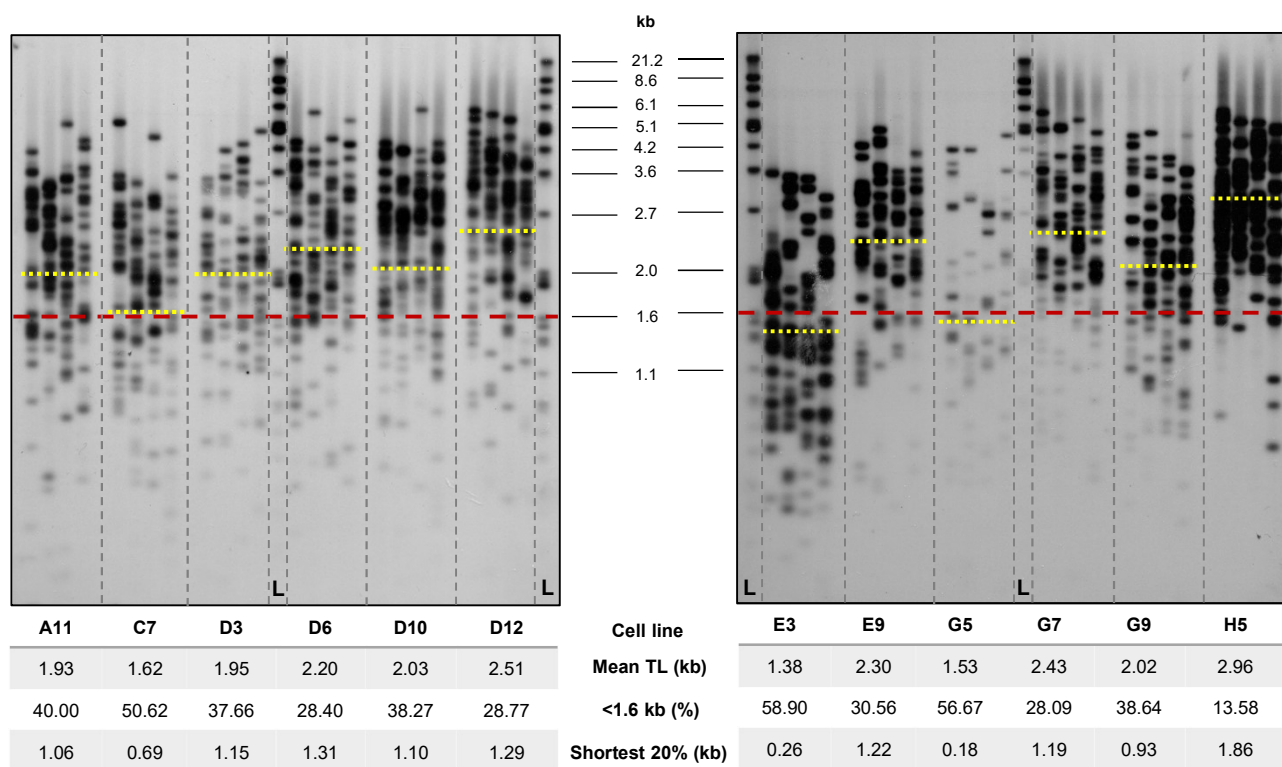

**B**

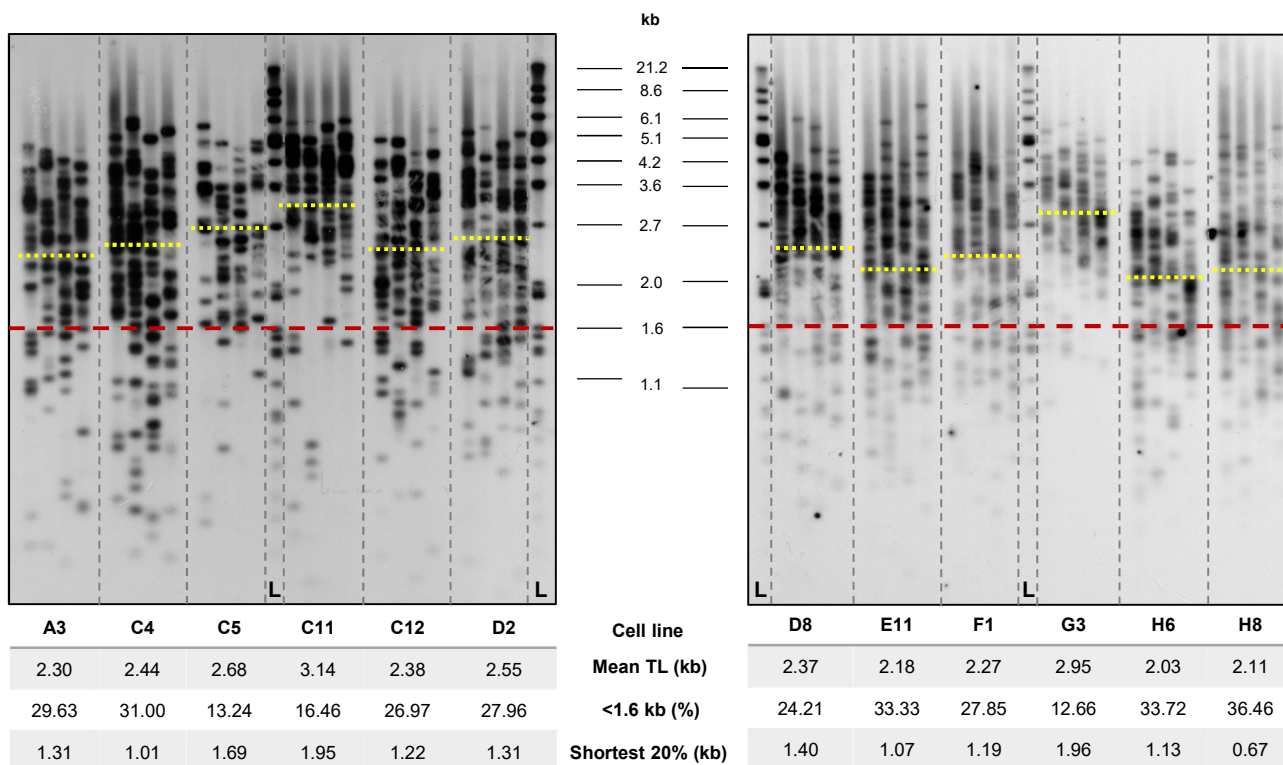

**Figure 6 - figure supplement 2**

Supplement: supp [file elife-40037-supp-v1.zip › elife_poa_e40037_Figure_6_figure_supplement_2.pdf]

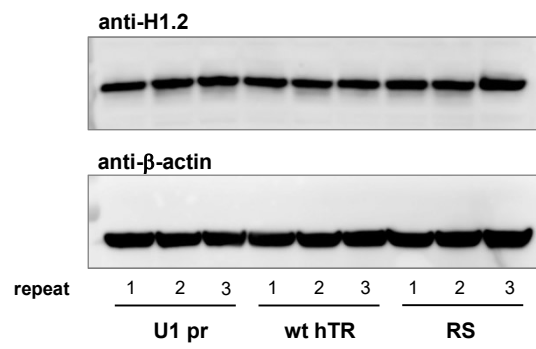

**Figure 4 - figure supplement 1**

Supplement: supp [file elife-40037-supp-v1.zip › elife_poa_e40037_Figure_4_figure_supplement_1.pdf]

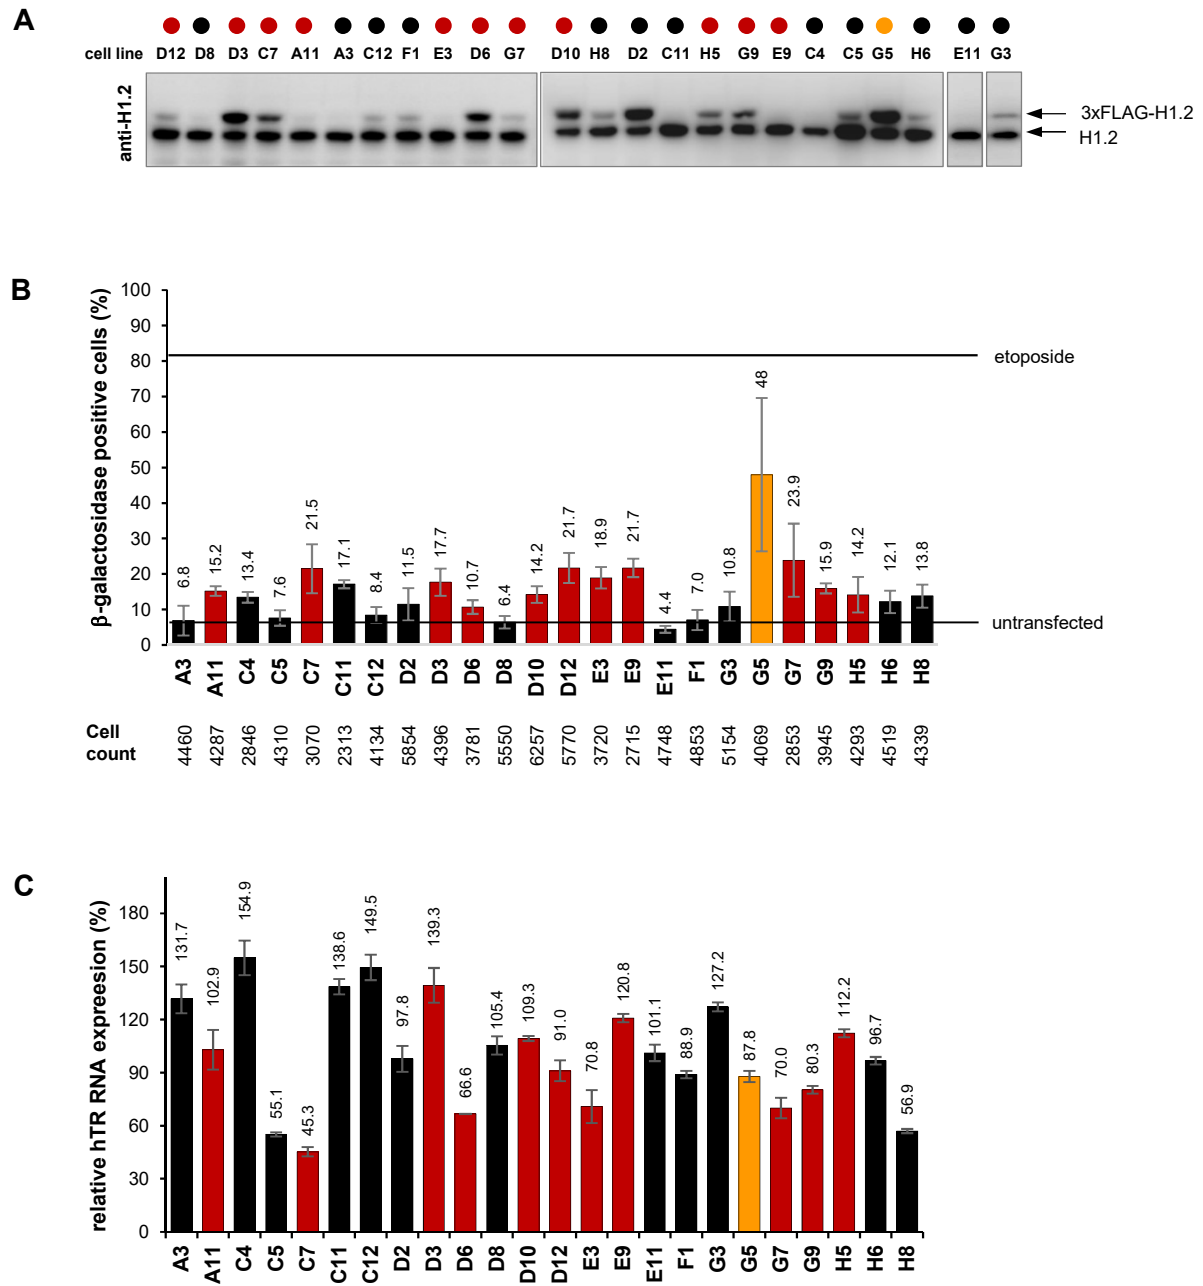

Figure 6 - figure supplement 1

Supplement: supp [file elife-40037-supp-v1.zip › elife_poa_e40037_Figure_6_figure_supplement_1.pdf]

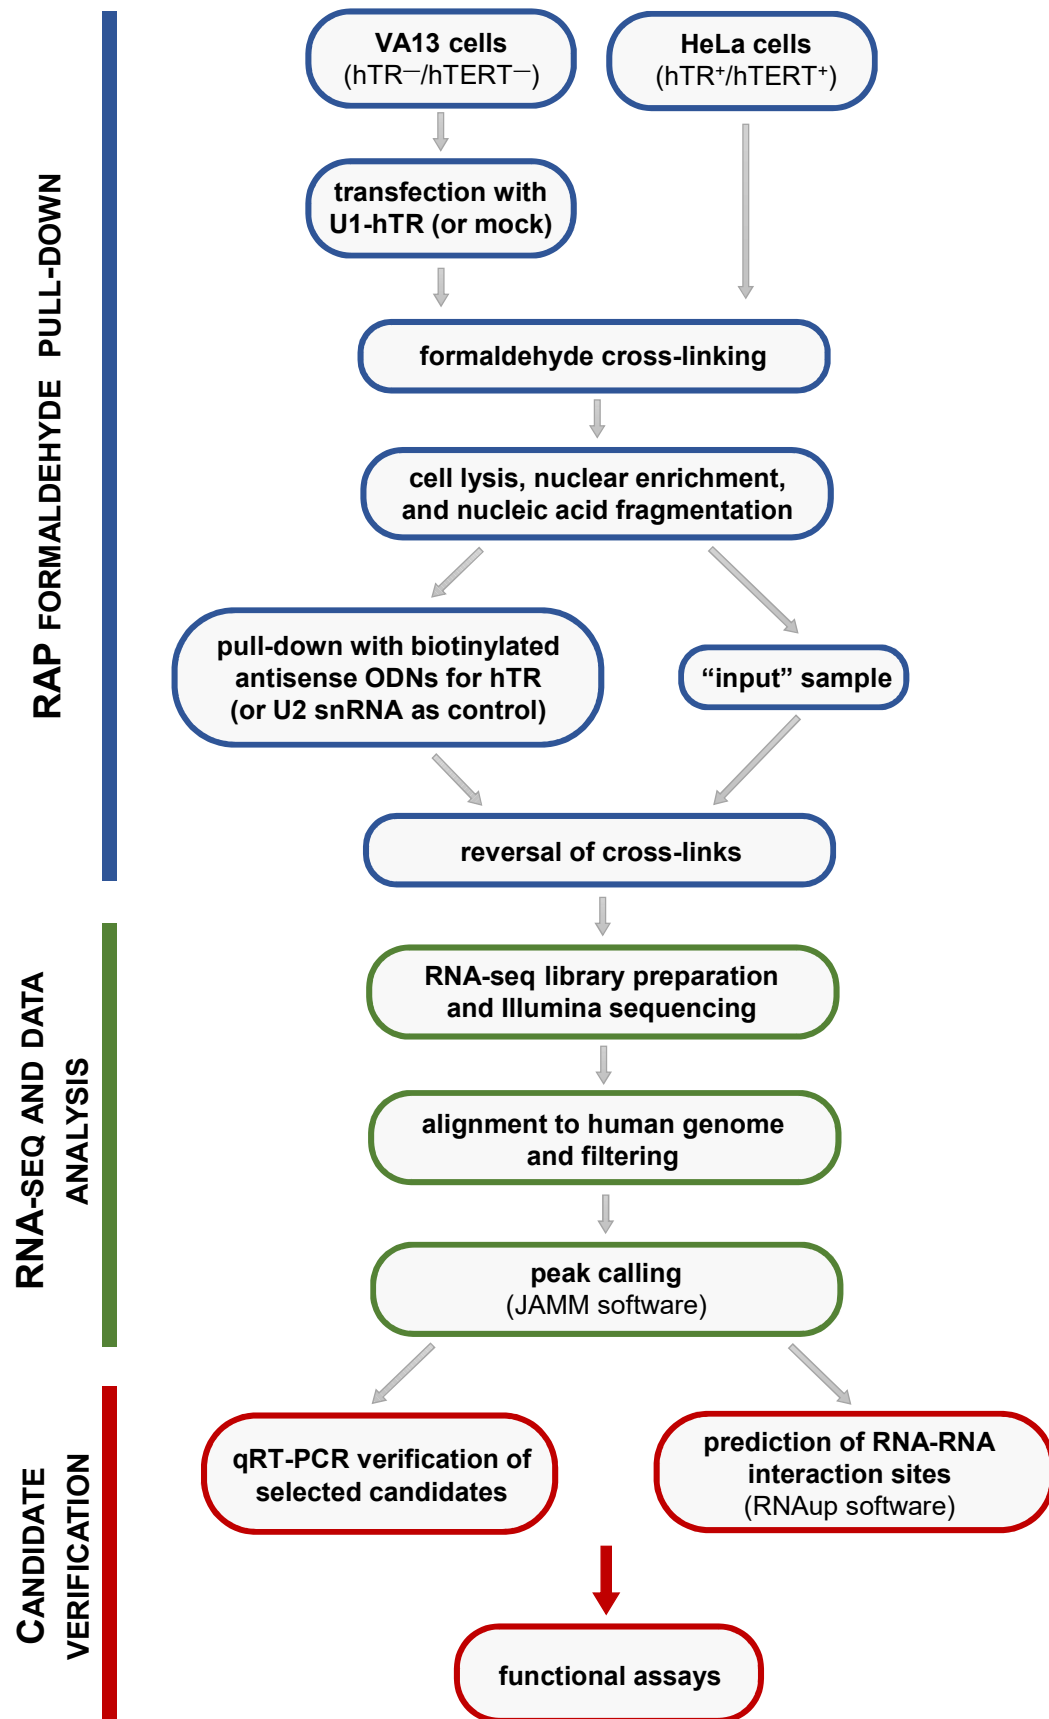

Figure 1 - figure supplement 1

Supplement: supp [file elife-40037-supp-v1.zip › elife_poa_e40037_Figure_1_figure_supplement_1.pdf]

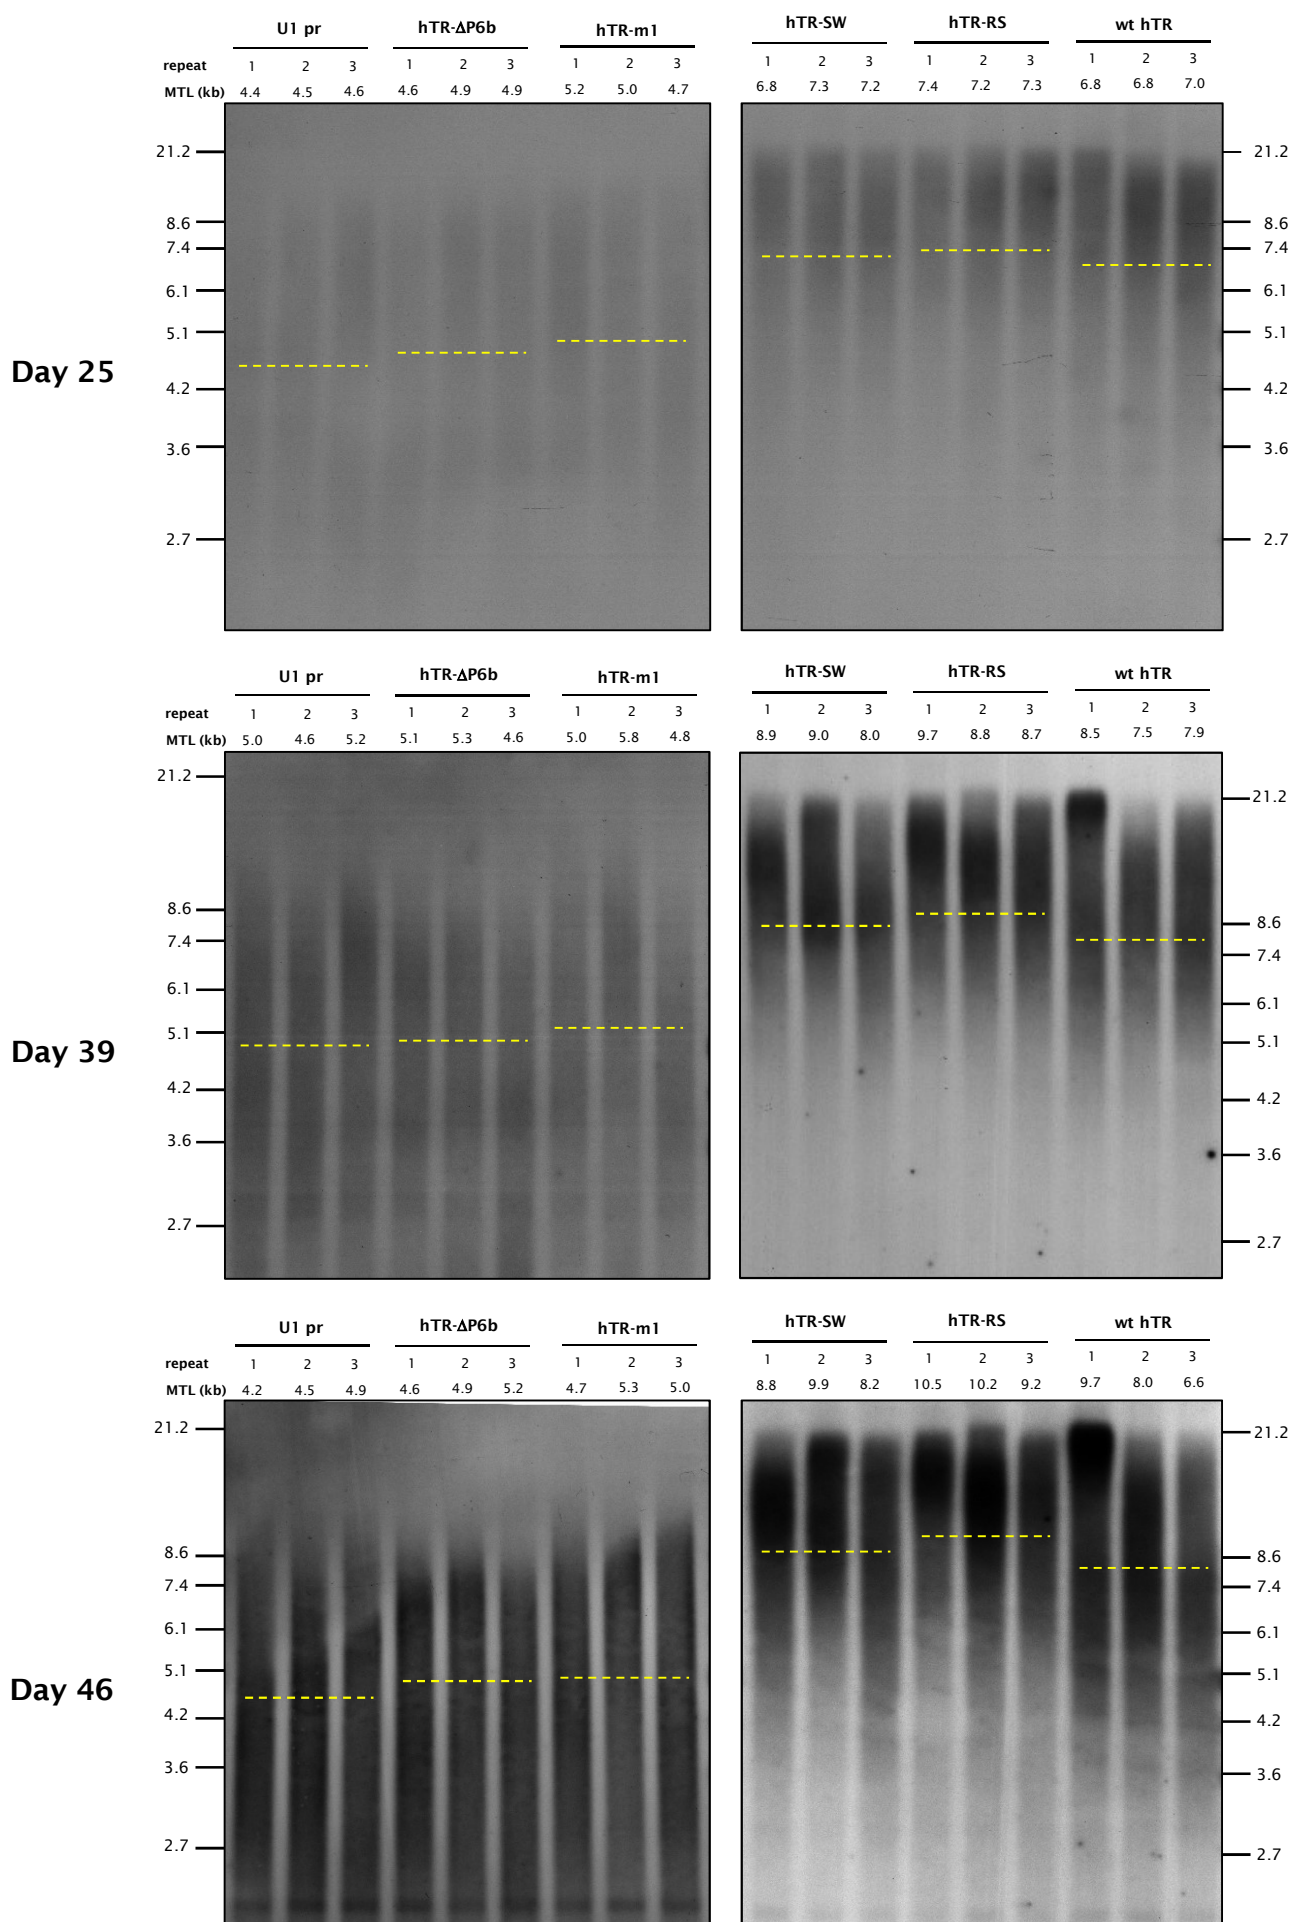

**Figure 4 - figure supplement 2**

Supplement: supp [file elife-40037-supp-v1.zip › elife_poa_e40037_Figure_4_figure_supplement_2.pdf]

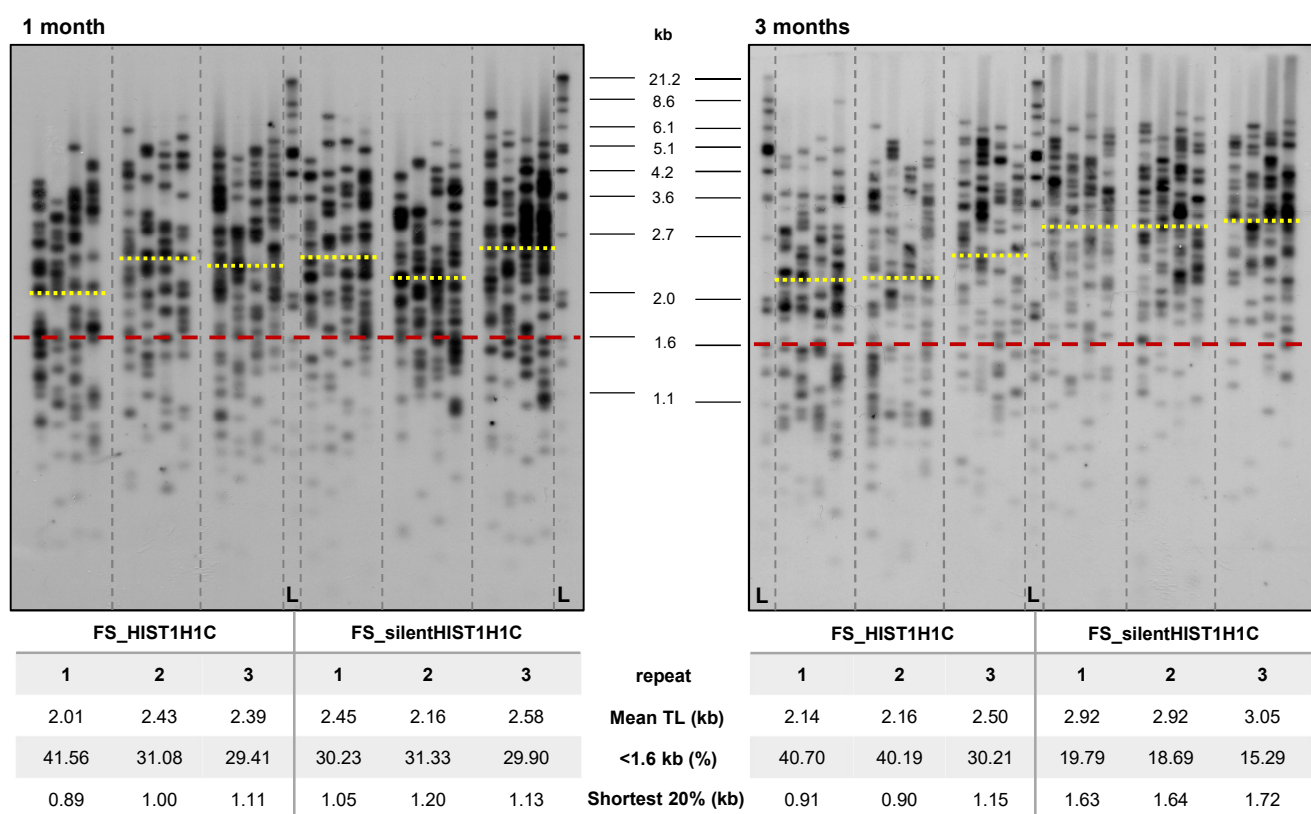

**Figure 7 - figure supplement 1**

Supplement: supp [file elife-40037-supp-v1.zip › elife_poa_e40037_Figure_7_figure_supplement_1.pdf]
